# Supplementary material for: The fate of pyruvate dictates cell growth by modulating cellular redox potential
Source: eLife. 2025 Dec 16;13:RP103705. doi: 10.7554/eLife.103705 (PMC12707817; doi:10.7554/eLife.103705)
Supplement: Figure 1—figure supplement 1—source data 1. [file elife-103705-fig1-figsupp1-data1.xlsx]

## Sheet: a and b
	72h	72h	72h	72h	84h	84h	84h	84h	84h	96h	96h	96h	96h	96h	108h	108h	108h	108h	120h	120h	120h	120h	120h
FBgn0267431	9	17	2	3	9	2	5	5	2	6	10	6	3	8	39	11	11	9	13	17	15	18	6
FBgn0085804	0	0	0	0	0	0	0	0	0	0	0	0	0	0	0	0	0	0	0	0	0	0	0
FBgn0039987	0	0	0	0	0	0	0	0	0	0	0	0	0	0	0	0	0	0	0	0	0	0	0
FBgn0267798	255	536	535	434	515	897	1053	755	881	450	262	570	549	393	191	177	272	209	145	82	144	112	168
FBgn0267797	0	0	0	0	2	4	1	4	2	1	12	4	4	6	24	36	13	34	45	40	16	44	50
FBgn0058182	0	0	0	0	0	0	0	0	0	0	0	0	0	0	0	0	0	0	0	0	0	0	0
FBgn0267430	13	14	3	1	18	40	7	10	13	12	36	41	30	43	146	163	36	85	144	281	198	384	162
FBgn0266747	0	1	0	0	1	4	1	1	0	5	6	2	0	6	14	9	5	12	5	21	5	10	19
FBgn0086917	1	338	19	174	142	140	5	44	1	238	93	5	0	547	320	135	840	38	369	314	476	23	0
FBgn0010247	2247	1973	1258	1207	1130	2138	1185	1681	1023	725	890	1504	1434	1471	1526	1968	1538	1872	1692	1766	1389	1968	1201
FBgn0086378	1700	1293	1202	1163	1239	1146	972	1221	879	685	1174	1049	862	786	1010	990	1088	898	1152	1021	1358	850	612
FBgn0267816	0	0	0	0	0	0	2	0	0	0	1	1	0	5	8	2	6	5	7	16	5	15	14
FBgn0263977	6539	5021	4542	4440	4539	4148	3148	3638	3127	1849	3346	2845	2439	2098	2353	2114	2227	2060	2470	2361	2818	1903	1646
FBgn0069923	1227	984	741	726	813	773	474	974	773	367	556	470	392	345	222	209	277	214	249	250	369	199	84
FBgn0039955	2677	2255	1801	1909	1714	2214	1616	2082	1346	1013	1051	1793	1423	1557	1581	1573	1636	1603	1773	1534	1502	1690	1337
FBgn0259821	54	156	139	139	69	162	46	78	66	63	58	50	128	98	100	66	175	81	121	76	126	111	83
FBgn0027341	1096	1205	3335	4196	477	1100	882	526	668	824	1057	1454	1144	691	1146	836	2136	845	859	335	1280	380	221
FBgn0085812	18	20	15	8	11	38	13	40	6	6	27	23	9	37	49	50	19	34	58	58	63	63	72
FBgn0058198	36	211	228	34	48	104	11	64	105	8	7	71	6	3	3	6	7	7	7	6	60	8	8
FBgn0286937	1	1	0	0	2	3	4	2	1	0	1	1	4	2	1	1	1	8	4	10	9	3	7
FBgn0037213	326	659	409	595	385	504	320	420	362	417	335	481	343	471	455	215	664	194	520	277	539	256	90
FBgn0053294	8	7	3	4	4	2	4	7	6	0	3	4	1	3	7	6	9	2	7	8	8	5	8
FBgn0000500	1	53	36	44	16	11	0	0	2	14	10	1	10	20	20	1	50	4	17	8	27	5	1
FBgn0037215	4121	3851	3921	3301	2833	3939	3317	3046	2759	2377	2596	3055	2671	2502	1492	1646	1884	2032	1697	1677	1602	1662	1550
FBgn0037217	185	870	516	902	146	145	240	139	142	323	202	287	202	129	649	113	125	71	128	104	99	84	60
FBgn0037218	2902	2368	1589	1985	1470	2302	1493	1861	1297	999	1201	1632	1522	1425	1766	1836	1481	1874	1532	1440	1143	1998	2017
FBgn0051516	0	11	5	8	0	2	5	0	0	8	8	24	10	7	50	5	8	7	36	32	17	18	10
FBgn0261436	3276	2370	2573	2230	2591	2229	2262	1921	1885	1851	2735	2542	2166	1688	899	1159	1220	1561	785	694	1084	740	732
FBgn0037220	2142	1698	1414	1429	1489	1605	1286	1416	1028	711	1340	1280	1131	1114	1548	1442	1160	1280	1254	1254	1072	1414	1345
FBgn0015331	686	556	417	482	456	662	500	548	268	232	465	525	419	468	1018	897	524	770	918	916	698	968	1051
FBgn0010225	38803	41810	48530	42065	34074	54001	49229	35327	35416	39089	45277	53614	43514	40485	24289	31382	25426	38288	34432	33764	25136	34228	35210
FBgn0267988	1	1	0	0	1	0	3	7	1	0	2	4	1	0	6	4	1	3	9	6	7	11	1
FBgn0037222	407	300	350	399	260	320	250	385	182	111	273	267	218	249	483	477	198	408	454	559	328	517	679
FBgn0085334	13	47	424	485	40	25	8	10	47	3	10	68	2	1	155	35	30	31	6	6	125	9	4
FBgn0037223	0	2	8	2	1	4	3	0	1	1	2	2	4	2	3	1	2	2	5	7	12	0	7
FBgn0037224	2	0	4824	2613	0	0	1	0	0	0	0	4	1	0	2	3	0	2	1	2	4	5	3
FBgn0037225	286	216	2655	2893	232	240	147	264	148	60	139	82	83	73	10	18	25	25	10	10	17	9	13
FBgn0250821	20	33	31	11	65	139	84	161	47	61	221	212	196	165	687	709	313	551	793	945	635	1001	1112
FBgn0037227	7	11	72	73	3	6	7	10	3	0	3	4	8	5	13	5	11	7	7	13	19	9	3
FBgn0041621	1	0	0	0	0	0	1	0	0	0	0	0	0	0	2	0	0	0	0	0	0	0	0
FBgn0037228	1231	1742	1711	1475	1639	2173	2216	1846	1299	1427	1899	1787	1515	1403	813	881	712	1301	492	417	547	427	520
FBgn0037229	307	134	118	15	38	25	54	24	13	6	43	28	33	28	115	97	54	103	102	153	77	132	136
FBgn0267157	1	1	0	0	0	1	0	2	3	1	0	0	0	0	0	0	0	0	0	1	2	0	0
FBgn0041605	610	2441	1701	1327	1168	1119	449	464	825	348	400	246	727	775	408	129	905	179	488	331	528	286	148
FBgn0037230	10917	8244	9790	10417	4464	4989	2768	2224	4122	618	1285	613	927	560	79	105	93	152	64	71	54	62	91
FBgn0262214	0	0	0	0	0	0	0	0	0	0	0	0	0	0	0	0	0	0	0	0	1	0	1
FBgn0037231	1106	934	720	887	674	885	625	946	504	355	654	638	577	540	1011	1000	684	800	1051	1139	960	945	1065
FBgn0027930	3351	3083	3363	3992	2291	2688	2989	2462	2004	2030	2588	2945	2237	2286	2326	2046	1370	1997	2814	2686	2002	2761	2832
FBgn0267815	38	29	23	33	12	19	14	21	17	9	16	12	12	14	22	24	11	13	40	41	24	39	38
FBgn0037232	1973	1599	1423	1561	1104	1189	922	943	890	356	487	610	522	534	377	459	352	466	367	343	317	408	389
FBgn0261086	124	130	92	83	91	175	95	134	52	32	121	84	115	148	172	245	176	198	184	220	127	188	265
FBgn0037234	700	561	443	499	374	527	375	459	287	205	323	308	299	343	581	463	447	491	585	442	416	621	576
FBgn0027866	2960	2364	1810	2133	1622	2281	1610	1858	1156	942	1440	1628	1508	1483	2127	2044	1821	1966	2220	1931	1917	2014	2070
FBgn0037236	904	633	604	604	455	476	353	420	257	213	353	378	306	311	340	327	358	249	281	213	207	220	183
FBgn0040687	76	14	1	22	3	5	2	8	0	0	3	1	5	3	2	1	0	3	2	2	1	5	3
FBgn0037235	795	677	458	683	482	705	450	671	312	343	673	685	581	629	1009	1139	756	939	1292	1069	722	1345	1257
FBgn0261434	3	16	9	4	5	8	1	1	10	0	8	1	7	4	7	9	15	2	11	9	8	3	7
FBgn0037238	21	111	88	74	47	94	5	19	45	13	13	10	39	70	33	22	54	25	65	46	44	57	50
FBgn0266227	33	137	118	87	41	80	3	17	34	11	15	2	45	45	22	1	52	3	30	23	46	19	11
FBgn0037239	14664	11262	11757	11169	10371	10304	8604	7348	9003	4824	6722	5859	6576	5365	2768	3621	2502	3886	4140	4243	3118	4185	4405
FBgn0037240	1990	1967	1401	1712	929	1891	1166	1225	813	1068	1071	1706	1591	1570	1831	1744	2055	1646	1892	1351	1279	1985	1825
FBgn0003882	1710	1358	1179	1350	1236	1255	806	984	939	560	779	847	734	726	579	590	557	605	671	717	600	873	637
FBgn0037241	935	803	695	877	530	766	675	650	388	524	734	800	590	557	624	638	713	712	577	457	530	493	443
FBgn0086608	174	107	96	94	132	140	92	222	94	117	100	98	72	101	66	135	138	75	48	81	92	69	34
FBgn0267814	6	7	11	6	8	11	5	12	2	2	2	4	4	9	4	4	5	8	4	8	7	15	12
FBgn0267661	72	34	45	68	73	69	60	142	53	42	50	67	35	35	20	44	37	39	12	23	29	15	14
FBgn0037242	1113	1053	918	858	822	1178	872	1056	700	623	1246	1077	998	1053	2098	1996	1095	1786	2277	2453	1865	2735	2646
FBgn0086605	2171	1571	1394	1521	1330	1488	1159	1346	977	611	1223	1147	1016	925	1377	1283	970	1105	1251	1087	1063	1221	1295
FBgn0037244	1142	735	510	538	494	477	436	458	305	261	474	513	345	352	477	489	519	378	565	560	644	434	425
FBgn0266697	16	13	23	9	11	16	6	11	7	5	15	11	4	5	10	12	4	3	7	12	9	1	6
FBgn0263594	20048	18236	14956	13908	14862	16935	10922	13602	11969	6210	8081	10646	10249	8993	9561	9758	7057	9217	8290	8246	7033	9877	8650
FBgn0052944	64	125	63	103	43	127	87	127	62	47	85	91	85	162	284	281	174	232	328	273	246	388	353
FBgn0051528	174	142	92	110	131	399	223	352	109	78	585	328	293	375	1641	1350	511	1129	1544	1908	1201	2062	2058
FBgn0037248	2025	1965	1448	1526	1271	1573	1208	966	1044	738	614	1027	1059	817	533	499	657	553	556	448	459	495	486
FBgn0051525	336	268	184	152	197	387	239	416	127	88	437	289	256	296	954	889	351	710	820	924	679	1109	1156
FBgn0037249	14778	12459	11489	12788	9807	11928	9554	8321	8070	6226	7804	9565	8359	6919	7742	7347	7879	7612	8035	6888	6939	6845	7188
FBgn0037250	818	613	543	628	452	526	350	409	291	197	292	361	275	312	255	300	252	291	265	216	300	263	245
FBgn0267813	0	2	0	1	1	0	2	1	0	1	7	2	6	1	11	15	10	8	7	20	17	17	26
FBgn0037251	689	525	426	503	437	464	310	432	319	224	414	381	283	194	316	323	359	334	254	255	285	263	210
FBgn0264983	2	0	0	2	1	0	2	4	0	0	8	4	2	9	64	41	11	34	73	59	41	68	87
FBgn0037252	1753	1759	1258	1540	988	1715	1198	1428	864	864	1179	1490	1403	1276	1756	1693	1491	1600	1328	1257	1099	1866	1785
FBgn0051522	1643	1807	3312	3127	1170	1433	747	1435	1100	686	534	655	678	735	1176	476	759	529	1281	2443	1263	2465	1579
FBgn0263620	78	75	65	57	71	67	62	64	77	31	37	48	23	22	12	6	21	7	10	12	19	7	13
FBgn0051523	2769	1732	3330	2186	1782	2600	1597	2539	1417	1550	1490	1465	1268	1835	2885	2757	2060	2272	3580	3929	2736	4758	4003
FBgn0037254	12	19	19	5	35	116	82	98	34	49	177	214	152	175	767	802	272	576	734	792	468	1238	1214
FBgn0037255	1549	1201	901	1204	883	1015	721	773	504	436	664	705	657	530	648	631	750	554	622	501	510	556	556
FBgn0085386	13	112	82	102	47	87	11	32	48	29	18	14	67	67	42	25	57	32	37	42	54	19	30
FBgn0085454	1	10	25	1	52	140	97	149	47	50	297	206	194	213	1295	1139	424	879	1315	1593	1022	1888	2013
FBgn0051526	0	0	0	0	3	3	3	3	0	0	10	7	6	9	66	80	26	40	81	138	88	146	121
FBgn0037260	0	0	0	0	0	0	1	0	1	0	0	0	0	0	0	0	0	0	1	0	0	0	0
FBgn0052945	3	4	4	4	1	17	10	10	1	1	23	3	9	14	120	56	19	36	75	87	76	94	100
FBgn0267118	2	3	1	3	3	4	1	7	1	0	5	0	2	2	7	7	1	3	8	7	1	7	3
FBgn0265376	2	3	5	3	1	0	0	2	1	1	0	2	0	2	34	5	21	10	42	28	24	19	3
FBgn0087012	7	9	11	9	11	9	9	14	0	3	12	24	6	12	83	69	29	47	69	57	51	78	67
FBgn0267233	2	0	0	0	0	0	0	0	0	0	0	4	0	0	0	0	0	0	0	0	0	0	0
FBgn0037261	2659	2318	1907	2185	1823	2114	1577	1853	1514	857	1423	1518	1361	1420	1977	1646	1759	1591	1903	1616	1643	1593	1535
FBgn0286036	0	0	0	0	0	0	0	0	0	0	0	0	0	0	0	0	0	0	0	0	0	0	0
FBgn0037262	1628	1198	772	926	721	1030	751	1021	407	314	884	698	575	632	1120	1182	775	1032	1087	1008	758	1112	1310
FBgn0037263	72	61	30	62	38	42	21	38	29	17	24	29	21	22	36	40	36	34	41	35	29	37	25
FBgn0040466	233	248	199	244	193	225	197	242	130	127	174	213	190	139	150	170	205	147	183	136	167	172	154
FBgn0022981	522	382	194	218	200	447	227	350	121	80	190	215	264	231	501	550	230	467	356	437	288	536	641
FBgn0265038	2	0	1	1	1	8	6	15	2	3	10	17	5	7	123	83	34	54	85	105	51	138	151
FBgn0087013	17521	14214	12692	11743	11396	14064	9990	9196	9717	6699	7622	9310	9294	7477	6974	7646	6993	7804	6204	6338	5174	8229	8701
FBgn0037265	170	226	145	183	181	195	163	198	154	182	263	336	210	189	233	291	260	356	259	197	269	207	218
FBgn0263346	1606	1387	1365	1406	878	1492	921	1129	823	866	784	1276	1151	1174	1363	1218	1530	1514	1491	1295	1088	1839	1761
FBgn0265039	0	0	0	0	0	1	0	1	0	0	7	3	1	2	39	27	14	20	32	53	30	53	41
FBgn0265040	1	0	0	0	1	5	0	3	2	1	11	6	6	4	40	31	7	35	46	56	33	78	48
FBgn0053927	0	0	0	0	0	0	0	3	0	0	0	1	0	0	0	0	0	2	0	0	0	0	0
FBgn0037270	7591	5785	5372	5820	5067	4735	4063	4156	3618	2686	4687	3718	3392	2561	3241	2801	3906	3038	3200	2611	3252	2277	2318
FBgn0266228	2	4	3	3	3	1	0	0	1	2	1	0	3	0	1	3	1	4	0	0	1	1	4
FBgn0027570	1421	1463	1991	2690	1133	1456	1075	919	957	968	1137	1254	1111	953	885	1045	917	1105	1606	1429	1163	1399	1421
FBgn0026620	2831	2422	2005	2177	1884	2653	1693	2066	1361	990	1349	1919	1688	1839	2540	2615	2336	2384	2417	2351	2113	2580	2597
FBgn0267812	1	2	0	0	0	0	0	0	0	0	0	0	0	0	0	0	0	0	0	0	0	0	0
FBgn0283546	0	0	0	0	0	0	0	0	0	0	0	0	0	0	0	0	0	0	0	0	0	0	0
FBgn0010750	1737	1392	1110	1295	1006	1301	873	1055	689	512	857	820	769	711	964	828	879	862	866	725	818	821	872
FBgn0264907	124	954	595	1092	286	445	255	304	407	963	205	292	403	291	363	105	423	59	99	214	129	53	46
FBgn0264897	0	0	0	0	2	2	5	0	0	1	1	6	1	0	12	19	2	8	14	17	22	28	21
FBgn0037275	18	21	47	47	10	11	7	19	13	9	3	11	12	17	23	25	22	11	25	25	20	36	49
FBgn0037276	131	224	138	109	238	755	406	631	203	149	626	617	571	634	2005	2054	785	1654	1806	2099	1274	2571	2877
FBgn0260794	10513	7659	5082	6068	4109	7866	4418	5305	3557	2654	2464	4926	4904	5191	9183	8684	4950	7595	7199	7434	4697	14228	14429
FBgn0026417	117	72	86	91	41	57	35	59	32	27	46	25	33	40	45	34	37	28	55	31	48	46	53
FBgn0037279	1810	1588	1160	1338	1554	1810	1260	1471	1134	869	1487	1529	1267	1079	1536	1349	1730	1405	1251	1019	1212	1114	895
FBgn0037280	8	4	1	5	2	5	7	4	5	0	1	2	5	1	4	8	9	3	5	4	2	0	1
FBgn0037282	1084	906	641	735	575	861	496	756	411	300	492	575	499	622	750	756	651	755	663	658	555	768	647
FBgn0037283	28	34	36	13	60	183	119	196	44	79	409	225	218	259	1177	1058	343	813	1243	1410	918	1613	1752
FBgn0037284	0	0	0	0	2	4	1	2	5	3	17	7	8	9	84	62	22	33	77	111	67	108	101
FBgn0003002	8	87	16	31	11	15	7	8	7	15	11	4	8	73	63	11	105	11	73	45	83	11	2
FBgn0020280	2	15	16	5	30	107	77	99	28	38	191	172	145	194	829	764	270	579	827	910	588	1139	1090
FBgn0267140	6	3	1	1	4	11	7	13	5	1	11	9	13	24	36	43	18	44	62	63	38	82	89
FBgn0004913	1914	1458	975	1263	904	1365	870	1053	654	478	742	886	877	943	1521	1455	976	1270	1362	1250	1046	1597	1670
FBgn0265082	1576	1936	1584	1783	1290	1868	1174	1338	1138	1251	850	1507	1426	1218	921	822	1411	1021	1282	1141	962	1505	1043
FBgn0266698	0	1	4	0	6	14	6	10	2	5	25	20	22	28	102	87	50	72	161	188	109	232	141
FBgn0004183	0	1	0	0	0	1	2	2	0	0	0	0	0	0	0	1	0	0	0	0	0	0	0
FBgn0004436	2685	2362	1995	2044	2170	2195	1693	2146	1521	1071	1766	1807	1526	1383	1742	1616	1698	1572	1884	1831	1640	1775	1528
FBgn0037288	1	2	7	1	0	1	0	0	3	0	0	0	0	0	1	0	0	0	0	0	9	1	0
FBgn0250839	281	13	70	1910	4	0	4	9	0	5	0	0	3	3	13	2	2	3	42	24	21	72	7
FBgn0037290	237	113	125	362	83	69	22	51	58	25	57	37	31	62	67	62	89	60	60	65	99	52	81
FBgn0037291	30	31	33	3	25	63	26	62	33	21	49	48	60	65	217	224	74	166	208	218	143	276	285
FBgn0263455	0	0	0	0	0	0	0	0	0	0	0	2	0	0	1	0	0	0	0	1	0	2	1
FBgn0263343	1	2	3	0	11	30	15	17	9	8	34	31	30	41	121	129	53	109	151	155	125	252	196
FBgn0037292	0	0	2	2	0	0	0	3	0	0	0	0	0	0	2	0	0	1	0	6	1	1	3
FBgn0267145	3	1	0	0	0	2	0	0	0	0	1	0	3	0	3	1	8	5	2	1	3	2	0
FBgn0286032	4	1	1	0	1	0	0	2	0	3	0	3	2	0	3	7	5	2	0	0	0	1	1
FBgn0263626	0	0	2	1	1	4	4	5	0	1	4	3	6	4	7	9	2	1	20	5	10	16	11
FBgn0267148	2	0	1	2	1	0	0	1	0	0	0	0	0	0	1	2	0	0	1	0	0	0	0
FBgn0010313	470	948	584	668	378	562	568	513	435	591	438	582	592	553	649	391	895	370	727	536	507	494	316
FBgn0262605	2	1	0	0	5	3	1	3	0	3	0	8	2	0	32	6	5	2	2	1	60	4	0
FBgn0037293	1072	732	627	721	675	659	471	625	490	328	518	629	476	490	554	605	491	576	605	546	537	635	575
FBgn0040684	12	21	19	4	21	63	59	74	22	26	79	70	85	98	327	299	114	265	386	393	261	389	466
FBgn0037295	244	188	92	145	107	191	127	193	70	36	121	143	147	137	247	290	121	255	240	256	211	308	404
FBgn0037294	235	156	91	166	75	109	55	72	39	19	41	35	45	61	47	82	37	83	48	64	20	48	38
FBgn0286879	10	3	3	9	0	5	2	3	1	0	0	3	2	2	0	2	1	0	2	1	0	1	6
FBgn0259212	1497	1422	828	1223	703	1357	862	776	626	619	444	830	930	880	1000	897	1031	940	1292	958	745	1371	1205
FBgn0263018	0	1	1	0	0	0	0	1	0	0	0	0	0	0	1	0	0	0	0	1	1	0	0
FBgn0037296	201	154	150	133	216	500	260	492	140	108	583	463	370	423	1264	1385	481	1085	1481	1689	1081	1949	1836
FBgn0037297	719	536	372	537	394	491	387	494	273	224	448	402	353	316	552	491	442	415	480	391	432	415	451
FBgn0037298	6821	5268	5450	5242	4635	5465	4885	4521	4089	3175	5109	4428	3825	3367	2870	3442	2409	3526	2830	2838	2684	2701	3067
FBgn0040682	1	1	2	1	0	2	3	0	1	0	5	1	1	2	1	4	8	0	3	1	1	1	3
FBgn0037299	803	643	560	589	517	565	396	562	408	296	543	581	408	405	573	574	429	514	634	613	538	522	546
FBgn0040208	1224	981	705	884	591	947	666	848	439	344	574	606	631	603	953	907	743	800	860	748	666	839	831
FBgn0037301	2153	1500	1269	1355	1203	1562	1077	1259	842	535	1024	952	932	893	1373	1472	871	1230	1156	1117	903	1333	1555
FBgn0087005	0	0	4	1	1	1	0	0	0	3	1	0	1	2	1	0	1	2	5	1	0	0	0
FBgn0260462	3504	3221	2501	3309	1790	2540	1866	2285	1472	1639	1908	2210	1702	1935	3182	2783	2891	2404	5016	4706	3062	4886	3899
FBgn0053293	17	37	39	5	92	213	198	285	62	93	593	360	323	373	1821	1489	584	1220	1915	2278	1532	2525	2337
FBgn0264789	2	6	3	1	1	0	3	5	0	1	1	1	1	7	3	4	4	1	7	14	2	18	10
FBgn0037304	3	3	4	4	6	0	1	3	1	2	2	0	2	2	11	10	9	4	6	7	10	7	8
FBgn0037305	2222	1332	1282	1515	1390	1059	769	949	844	403	752	575	528	470	492	483	412	494	514	448	552	415	490
FBgn0264785	1362	1092	803	1117	748	1067	649	973	597	489	651	732	620	722	945	1007	888	902	725	846	635	924	956
FBgn0037307	4	6	4	6	4	22	21	20	3	18	54	38	36	64	382	311	98	198	454	544	387	691	628
FBgn0267443	20	11	15	14	4	4	6	12	3	4	4	1	4	4	2	7	3	3	6	7	4	3	5
FBgn0266393	0	0	0	0	0	0	0	0	0	0	0	0	0	0	0	0	0	0	0	0	0	0	0
FBgn0013576	4956	4529	4122	4405	3066	3893	2690	3194	2411	2072	2138	3519	2798	2570	2434	2666	3366	2688	2581	2192	2327	2237	2050
FBgn0051538	176	299	257	89	420	1385	941	1320	432	460	2374	1798	1611	1873	8330	7667	2878	5805	8432	9915	6318	12552	12620
FBgn0037310	314	244	195	172	162	412	301	406	174	91	449	340	350	384	1076	1080	398	884	975	1176	759	1333	1463
FBgn0037312	3188	2372	2344	2760	2028	2570	2627	2506	1742	1798	2820	2460	1942	1901	1589	1943	1825	2070	1199	1073	1289	972	1226
FBgn0037313	3471	2635	2743	2841	1899	2214	1994	2227	1598	1337	2178	2071	1559	1581	1786	1762	1643	1793	1816	1744	1585	1495	1665
FBgn0250746	7428	5142	4713	5647	4850	4911	3919	4419	3283	2282	4646	3714	3322	2688	3740	3849	3071	3436	3636	3497	3332	3499	3810
FBgn0037315	1069	778	607	726	471	860	567	785	480	366	570	683	537	559	1146	1295	842	1095	1105	1021	781	1290	1341
FBgn0264912	1	1	1	0	1	0	0	1	0	0	0	0	0	0	0	4	0	0	1	1	1	0	1
FBgn0051542	0	0	0	0	0	0	0	0	0	0	0	0	0	0	0	0	0	0	0	0	0	0	0
FBgn0085306	0	0	0	0	0	0	0	0	0	0	0	0	0	0	0	0	0	0	0	0	0	0	0
FBgn0003275	1580	1277	959	1150	1055	961	789	872	560	378	1042	726	665	567	864	794	639	668	812	732	749	734	787
FBgn0086695	333	260	217	220	183	182	110	142	87	68	172	124	105	100	80	81	121	94	64	45	83	69	49
FBgn0037317	301	258	186	251	223	212	163	251	140	104	195	196	170	163	276	292	184	262	281	243	240	267	360
FBgn0041707	248	449	368	443	215	249	40	137	130	84	127	39	115	223	268	116	393	98	384	298	292	224	210
FBgn0001311	185	384	1160	1624	132	245	71	130	239	129	95	233	93	279	490	199	428	127	328	119	519	209	125
FBgn0037320	2	4	8	1	8	17	22	49	11	10	94	49	52	63	386	301	125	244	389	461	302	633	587
FBgn0011965	0	0	0	0	0	0	0	0	0	0	0	0	0	0	0	0	0	0	0	0	0	0	0
FBgn0264712	1222	900	735	703	678	907	608	764	481	347	627	654	594	599	1125	1056	607	949	1247	1286	942	1465	1206
FBgn0037322	0	0	0	0	0	0	0	0	0	0	0	0	0	0	1	0	0	0	1	0	0	0	0
FBgn0037323	265	64	119	159	77	17	4	10	3	22	9	0	11	0	4	9	16	2	18	17	22	31	5
FBgn0037324	10	13	6	9	7	27	15	21	7	3	14	16	12	15	23	32	19	30	35	33	19	36	30
FBgn0037326	108	167	77	70	70	67	21	40	38	18	29	19	52	101	117	71	134	66	160	96	120	126	102
FBgn0037325	0	0	3	0	10	25	27	31	7	33	158	92	63	91	914	728	281	474	970	1109	775	1356	1377
FBgn0037327	2794	2456	1871	2119	1546	2429	1554	1746	1653	1435	1317	1914	1590	1603	1370	1643	1475	1805	1439	1312	1050	1569	1808
FBgn0037328	35685	24949	25699	29081	22069	22982	18676	18057	20128	9899	21780	15479	14159	11097	10064	10377	10841	9061	9014	7311	8945	6599	7644
FBgn0037329	2411	1705	1570	1803	1247	1769	1214	1448	1049	548	1374	1121	1098	955	2289	2268	986	1780	2194	2393	1696	2738	3097
FBgn0037330	3197	2113	2211	2575	1681	1893	1328	1475	1421	583	967	744	825	553	415	440	454	444	402	324	374	274	351
FBgn0011715	741	769	552	681	564	571	464	492	355	320	584	471	416	453	615	432	669	411	668	482	644	358	456
FBgn0266539	0	0	0	0	0	0	0	0	0	0	0	0	0	0	0	0	0	0	0	0	0	0	0
FBgn0025825	0	0	0	0	0	0	0	0	0	0	0	0	0	0	0	0	0	0	0	0	0	0	0
FBgn0037332	1097	929	781	755	691	884	690	621	501	394	415	565	543	576	542	542	436	559	509	469	385	537	506
FBgn0015402	934	729	567	654	474	743	511	654	379	299	498	505	461	520	800	600	500	652	683	607	513	694	742
FBgn0051550	1648	1491	1194	1425	1149	1391	1071	1194	1004	612	861	904	727	803	1140	980	1074	967	1070	901	909	940	1058
FBgn0051547	182	476	262	471	229	223	89	454	123	271	272	143	113	207	976	359	1336	494	679	404	578	488	274
FBgn0010399	15	128	108	132	87	85	12	35	45	33	38	18	54	88	69	52	82	37	94	54	69	79	76
FBgn0010051	1402	2307	2392	1863	2004	3649	2453	1884	2586	2320	1316	2837	2855	2232	926	976	1847	1707	1064	1111	1179	1427	849
FBgn0264427	0	1	1	0	2	18	12	12	3	10	59	34	27	32	281	198	80	147	278	367	240	381	428
FBgn0037336	2362	2030	1323	1655	1043	1862	1156	1433	915	789	686	1235	1271	1381	1278	1214	1402	1245	1343	1283	1016	1506	1281
FBgn0014342	609	350	222	280	245	415	264	425	175	96	284	265	256	270	551	597	330	465	470	597	338	644	747
FBgn0086768	1219	958	762	819	746	933	681	979	565	394	952	844	742	686	1190	1179	795	1012	1110	1100	993	1045	1168
FBgn0037338	471	322	204	255	187	183	167	210	115	75	132	173	123	148	179	122	112	149	141	108	117	129	104
FBgn0037339	1075	1002	762	795	918	1184	883	1076	687	641	1079	1210	977	964	2644	2246	1968	2319	2949	2767	2369	3141	2895
FBgn0263484	0	0	1	0	0	1	0	0	0	0	0	0	0	0	0	0	2	1	2	1	0	1	1
FBgn0267811	1	0	1	0	0	0	0	1	0	0	265	9	2	4	1311	320	582	386	1064	493	478	373	310
FBgn0037340	891	615	554	704	541	574	360	519	382	228	432	309	248	221	220	253	217	217	250	223	257	156	238
FBgn0037341	2057	1374	1878	2074	1128	1338	1022	1368	966	612	877	746	609	678	519	561	518	615	493	418	443	365	378
FBgn0037342	825	619	430	511	492	523	393	495	292	194	493	374	268	347	631	598	368	581	672	625	512	605	682
FBgn0041191	2182	1769	1546	1784	1429	1729	1244	1674	1014	735	1601	1419	1172	1079	1893	1927	1259	1635	1927	1689	1351	1973	2104
FBgn0023023	110	396	372	428	139	187	46	121	120	94	61	72	120	155	296	71	316	56	392	268	237	411	198
FBgn0037344	2663	2543	1724	2178	1481	2392	1526	1657	1418	1258	1100	1838	1769	1765	2190	2005	1962	2003	1897	1663	1527	2456	2454
FBgn0286738	0	0	0	0	0	0	0	0	0	0	0	0	0	0	0	0	0	0	0	0	0	0	0
FBgn0037345	236	180	140	154	153	185	154	172	106	82	211	204	140	122	212	298	147	193	247	271	214	240	256
FBgn0014366	1682	1165	964	1079	943	1082	744	916	595	354	752	711	633	666	931	932	723	848	878	687	695	709	852
FBgn0283535	26341	30676	21851	25292	20214	23633	12297	32396	19072	13601	9718	11974	9615	11597	7779	8792	10193	8386	6141	6988	6427	6937	5863
FBgn0250753	24970	22419	23055	22215	19638	18275	16561	16024	13674	8680	15512	13805	13233	10817	11434	10060	10463	10827	11765	10733	10626	11140	10456
FBgn0082961	2	7	1	8	7	8	7	6	3	2	19	3	2	4	0	0	0	6	5	1	1	0	1
FBgn0082962	1	1	2	3	2	3	3	5	1	0	0	0	0	2	0	0	0	0	0	0	0	1	0
FBgn0082978	7	1	2	1	3	1	5	4	0	1	1	0	2	3	1	0	1	1	1	1	2	0	1
FBgn0082979	0	0	1	3	0	1	1	2	1	2	1	1	0	0	0	0	2	1	0	1	1	1	0
FBgn0082954	6	4	0	1	1	1	3	9	3	2	4	0	2	2	0	5	6	2	0	2	3	2	0
FBgn0086662	7	8	7	3	6	6	9	11	6	4	5	3	3	3	6	5	4	9	1	3	3	5	2
FBgn0082988	4	6	2	5	4	5	13	11	9	11	5	7	5	4	2	1	3	4	6	5	2	3	1
FBgn0082989	3	3	2	2	2	6	3	4	4	6	2	3	7	8	3	0	5	8	1	1	1	6	0
FBgn0037347	854	715	608	719	554	795	584	651	373	286	585	537	478	540	889	887	627	760	886	820	680	838	1023
FBgn0261004	1257	1007	581	801	530	915	620	734	326	288	575	617	607	684	1182	1252	692	1091	1036	910	760	1211	1412
FBgn0017550	3031	2454	1845	2219	1853	2061	1554	1624	1163	988	1388	1666	1342	1339	1707	1362	1630	1393	2004	1558	1658	1543	1414
FBgn0263619	19	1	4	5	7	4	3	2	2	1	6	0	3	0	9	1	2	4	7	10	5	8	18
FBgn0285959	15	12	9	9	4	0	5	7	6	2	10	6	6	8	16	4	8	14	10	10	20	13	9
FBgn0267810	28	21	15	21	10	22	13	12	13	6	11	6	9	10	20	25	8	13	19	12	14	12	19
FBgn0019637	1915	1337	899	1231	854	1079	840	815	582	420	745	633	625	591	695	553	688	572	623	486	590	500	568
FBgn0044823	535	409	324	455	247	337	233	374	174	141	281	289	195	264	600	447	340	380	467	905	523	489	415
FBgn0037350	270	174	187	185	167	175	177	183	112	91	208	171	115	130	251	242	151	146	200	348	261	135	196
FBgn0037351	59308	46088	47332	51719	39746	43143	38189	36201	35921	20558	38099	28520	27470	21761	18262	18406	20400	17758	17640	13774	16657	13384	14844
FBgn0260002	0	3	1	0	0	1	5	0	0	0	0	0	3	0	0	0	2	0	0	0	0	0	0
FBgn0086051	0	0	0	0	0	0	0	0	0	0	0	0	0	0	0	0	0	0	0	0	0	0	0
FBgn0051551	33	65	44	18	69	188	100	116	66	53	104	172	118	163	300	365	139	286	334	343	236	410	436
FBgn0051549	1040	590	495	480	402	392	329	274	191	220	484	356	275	233	420	314	423	314	279	345	346	345	353
FBgn0037354	7337	4447	4754	4895	4386	4037	3744	4450	3758	1964	3477	2696	2208	1794	714	1108	1165	1284	863	809	1207	658	758
FBgn0051546	14	11	17	5	17	66	57	58	24	33	159	119	92	108	645	535	181	422	680	717	567	961	935
FBgn0051548	4508	3570	3706	3580	4508	4186	3226	3787	3690	1596	3042	2357	2057	1623	762	1000	1099	985	472	479	761	459	486
FBgn0037356	1812	1207	1414	1351	910	1110	837	985	897	457	799	672	570	538	649	608	457	662	546	516	450	487	486
FBgn0027951	1789	1895	1264	1479	1076	1479	1080	1247	807	744	818	1261	1214	1351	1396	1087	1554	1177	1502	1303	1322	1468	1188
FBgn0262125	9725	9059	8496	9025	9039	9686	8815	7909	7277	6495	10799	9484	8580	6289	6444	6334	8521	7723	4555	3769	4938	4316	4741
FBgn0037358	2635	2869	3334	3167	2992	2908	1484	3332	2714	1731	1573	1499	1495	1652	868	1293	1332	1200	686	987	880	666	664
FBgn0037359	567	397	278	383	365	464	376	560	240	162	478	320	335	366	912	958	481	699	910	939	695	1013	1115
FBgn0037360	2504	1844	1463	1857	1410	1859	1263	1473	1082	757	1265	1340	1113	1154	1438	1471	1454	1417	1344	1081	1110	1191	1316
FBgn0264902	11	8	4	6	6	11	7	8	14	6	14	16	13	5	8	6	7	8	7	8	10	8	2
FBgn0046222	2167	1685	1331	1591	1390	1666	1277	1381	1030	788	1239	1198	1178	1051	1349	1444	1132	1358	1188	1136	952	1203	1498
FBgn0267809	0	1	3	0	1	9	8	18	4	8	8	11	13	13	80	92	44	71	123	131	74	129	133
FBgn0010772	2064	2052	1521	1808	1190	1816	1617	1765	1093	921	1335	1383	1259	1134	1807	1392	1474	1369	1606	1305	1184	1435	1435
FBgn0037363	1564	1265	888	1007	684	1135	786	923	651	512	464	881	839	709	778	844	780	817	996	969	634	1301	1012
FBgn0037364	34	52	37	46	37	62	41	67	21	26	91	75	46	101	199	225	133	179	232	223	178	260	242
FBgn0261261	727	738	525	550	376	693	303	535	308	152	200	311	359	461	606	565	495	539	478	417	352	594	681
FBgn0037365	0	0	1	0	1	3	5	12	2	4	30	21	26	25	252	202	93	161	236	341	226	431	389
FBgn0004878	16	565	207	466	234	142	5	11	28	115	64	7	166	350	182	7	408	18	149	95	144	27	20
FBgn0266229	0	0	0	0	0	1	1	5	0	0	8	3	2	6	24	14	2	5	12	12	15	14	17
FBgn0037368	366	230	188	211	177	165	127	199	108	58	162	118	110	115	129	134	83	169	138	124	103	135	169
FBgn0037369	1366	1013	914	995	741	1084	796	850	571	397	762	703	688	700	1414	1292	678	1108	1396	1420	1012	1534	1595
FBgn0037370	2329	1774	1668	1855	1849	1905	1599	1615	1330	1777	3378	3420	2239	2117	5860	5864	4408	5631	8109	8720	8664	8472	8183
FBgn0037371	1807	1317	883	1146	800	1207	760	827	536	469	624	854	766	748	1008	1011	822	961	826	796	658	889	1038
FBgn0027497	1322	1199	869	1015	772	990	686	838	612	508	644	898	749	720	836	794	891	842	774	645	641	696	748
FBgn0037372	827	574	488	697	484	493	331	448	292	208	356	305	321	310	359	275	418	296	370	271	328	277	239
FBgn0266672	2222	1676	1521	1638	1275	1757	1176	1397	1047	745	1161	1266	1186	1052	1100	1238	1069	1237	1160	1076	985	1134	1291
FBgn0027608	81	222	153	113	170	472	305	502	177	148	470	407	416	451	1317	1387	613	1081	1307	1516	977	1852	1798
FBgn0037374	3218	2842	3049	2574	2358	2629	2625	2526	2096	2110	2553	3236	2358	2166	1502	1847	1785	1946	1338	1299	1549	1224	1051
FBgn0037375	76	173	100	92	119	293	201	273	80	102	417	311	321	419	1347	1354	608	1017	1362	1501	1033	1930	2061
FBgn0037376	1146	915	655	812	579	874	572	655	379	340	747	672	586	720	1397	1308	920	1175	1592	1535	1320	1805	1743
FBgn0028690	7281	5631	4794	5698	4928	5118	4116	4551	2869	2600	4380	3914	3524	3139	4286	4295	3730	4186	4514	4060	3575	4072	4151
FBgn0037377	555	433	356	396	351	406	274	409	207	188	308	281	295	266	375	348	325	292	354	286	310	266	289
FBgn0037378	1639	1170	1075	1153	955	1218	927	1180	614	422	1064	968	803	779	1331	1385	775	1131	1279	1429	1047	1370	1507
FBgn0037379	643	544	442	426	389	697	446	603	298	273	428	629	533	515	794	925	557	887	822	747	650	951	905
FBgn0263353	51	287	224	212	82	140	17	42	91	30	47	13	95	107	102	56	168	47	120	68	89	93	80
FBgn0261561	204	268	213	235	271	784	557	735	286	263	934	802	714	747	2174	2613	1182	2134	2653	2834	2093	3313	3577
FBgn0037382	1358	929	674	858	653	932	662	881	457	302	721	649	575	652	1085	1041	653	963	988	900	760	984	1237
FBgn0284081	140	108	223	131	103	103	72	71	88	19	29	17	25	20	2	8	6	5	9	1	11	4	1
FBgn0037383	291	316	267	315	303	393	248	284	264	182	412	421	296	269	358	420	438	499	397	328	309	300	324
FBgn0037384	782	596	389	503	370	572	393	584	266	152	401	346	337	404	633	764	361	633	589	574	433	731	693
FBgn0037385	0	5	2	1	13	35	18	29	9	6	61	40	34	42	233	206	89	153	287	324	204	367	376
FBgn0037386	178	32	1507	152	114	34	60	185	211	40	53	77	15	388	117	70	100	300	185	50	95	179	43
FBgn0266702	3	0	0	6	0	1	5	0	0	0	5	1	3	1	3	6	2	1	4	9	3	11	3
FBgn0037387	1367	1123	1340	2815	405	343	221	403	221	169	293	132	146	115	131	140	210	75	112	118	108	94	98
FBgn0037388	30	35	18	15	59	126	80	163	36	57	307	253	218	273	1345	1374	501	989	1655	1978	1212	2565	2276
FBgn0037389	3	15	5	4	19	30	14	38	12	8	27	23	33	31	66	89	31	77	105	136	88	106	119
FBgn0029088	775	711	399	520	371	638	428	483	307	283	241	466	364	398	458	388	436	416	496	381	395	485	409
FBgn0085316	0	1	3	0	3	27	21	12	7	5	48	38	39	39	321	254	100	188	241	315	260	449	396
FBgn0028436	1121	805	774	904	620	640	483	578	546	191	408	296	253	228	188	215	140	188	191	187	217	181	191
FBgn0037391	1019	915	704	722	637	983	836	1149	480	522	847	778	689	709	1176	1139	714	938	1403	1419	1002	1377	1527
FBgn0267808	8	6	5	11	8	17	8	8	6	4	3	10	3	10	6	3	1	4	7	0	6	3	6
FBgn0083949	21	114	69	90	39	66	19	22	20	23	28	12	39	67	54	30	90	28	83	60	41	58	54
FBgn0267399	0	0	0	0	0	0	0	1	0	0	1	1	0	0	20	16	5	5	14	25	16	30	16
FBgn0267400	0	0	0	0	0	1	0	1	0	0	1	0	1	2	9	2	5	4	10	16	8	20	8
FBgn0040679	19	64	23	23	35	163	104	152	35	24	166	110	119	156	497	481	183	379	527	671	477	746	687
FBgn0266230	0	0	0	0	0	0	0	0	0	0	2	0	1	2	4	8	3	2	16	16	7	10	17
FBgn0266231	0	0	0	0	0	0	0	2	0	0	4	5	0	0	25	8	5	4	18	14	11	27	18
FBgn0284417	0	0	0	0	0	0	0	1	0	0	0	0	0	0	1	0	0	1	1	0	0	2	0
FBgn0011281	0	1	2	0	0	5	1	0	1	0	1	1	0	0	1	0	0	0	0	0	2	0	0
FBgn0010403	13	13	14	12	5	21	15	15	3	1	16	13	14	14	13	33	9	11	20	14	12	16	31
FBgn0266232	0	0	0	0	0	0	1	1	1	0	0	0	0	0	1	1	0	1	0	4	2	0	2
FBgn0266233	0	0	0	0	0	0	1	0	0	1	3	3	2	2	6	4	0	1	5	4	9	5	5
FBgn0003261	19743	18476	14555	15519	12037	13576	10520	12101	9120	6643	7347	8611	8255	7457	9459	6962	10715	7255	8556	6771	7659	7267	6216
FBgn0037395	2	8	213	183	6	5	0	17	3	2	1	0	0	2	3	0	4	2	4	1	1	0	1
FBgn0037396	1	0	4	2	0	0	0	0	0	1	6	3	1	4	1916	187	58	113	3904	4808	1200	6862	3235
FBgn0037397	0	0	0	0	0	0	0	0	0	0	0	0	0	0	0	0	0	0	3	1	0	2	0
FBgn0267941	0	2	0	0	1	0	0	0	0	0	0	0	0	0	0	0	2	0	0	0	0	1	0
FBgn0266226	0	0	1	0	2	1	0	4	0	0	4	2	1	5	28	38	12	15	51	58	44	68	35
FBgn0037398	4	9	6	10	33	61	53	82	31	50	256	131	170	185	1050	1069	336	709	1193	1379	840	1743	1699
FBgn0037399	0	1	0	0	0	2	3	6	0	0	3	3	1	0	17	4	1	2	4	7	6	9	17
FBgn0026077	169	1101	16826	12396	293	481	80	492	350	294	187	283	131	284	348	162	431	135	250	80	654	104	17
FBgn0266234	0	0	15	4	2	0	2	1	2	0	0	0	0	0	1	2	0	0	2	1	4	1	2
FBgn0046878	10886	7340	8813	12163	3733	4380	2360	1945	3832	367	596	355	435	186	5	7	16	36	6	3	7	7	17
FBgn0046876	255	193	276	311	169	194	159	163	178	69	74	112	87	66	889	185	139	182	1755	1647	727	2800	1287
FBgn0046875	124	202	2346	2548	74	147	24	93	88	47	25	133	14	36	86	51	110	22	17	10	142	14	16
FBgn0037402	19	25	32	17	65	165	93	176	50	58	245	227	187	230	763	740	259	614	771	778	556	956	870
FBgn0263497	0	0	0	0	0	0	0	0	0	0	0	0	1	1	5	6	2	2	11	5	8	0	9
FBgn0263498	0	0	1	0	0	0	1	0	0	2	3	0	0	0	24	8	1	3	12	18	9	16	13
FBgn0051559	7	14	20	134	10	11	3	18	35	2	4	9	1	0	33	15	13	18	36	34	15	37	47
FBgn0037405	15	7	9	9	6	14	7	8	4	1	16	19	13	13	76	50	25	38	67	95	52	119	132
FBgn0037406	0	0	0	1	0	1	0	0	0	0	0	0	0	0	1	0	0	0	0	0	0	1	0
FBgn0051562	3	0	0	1	0	0	2	5	1	2	4	3	2	0	0	1	1	0	0	1	5	0	0
FBgn0037408	96	80	58	95	35	54	40	61	40	46	28	28	37	29	28	40	50	14	32	23	16	23	9
FBgn0037409	91	36	13	1245	19	18	11	30	13	32	16	5	11	27	23	16	27	14	29	22	29	19	26
FBgn0037410	97	33	1025	1100	199	24	2	3	1	3	7	3	0	9	30	18	19	24	23	21	29	33	17
FBgn0037411	0	2	0	0	0	0	0	1	0	1	0	0	0	0	0	2	0	0	0	0	2	1	0
FBgn0037412	0	0	1	3	0	0	1	0	0	0	0	0	1	0	1	0	3	0	2	1	0	0	1
FBgn0037413	1	1	0	51	0	4	0	4	0	0	8	0	2	0	13	10	8	11	9	5	11	23	19
FBgn0027527	1949	34	309	39235	9	20	14	26	11	17	61	38	31	49	126	133	67	97	107	158	105	201	206
FBgn0037414	539	10	282	5610	0	4	1	1	5	4	0	2	1	0	0	0	0	0	0	3	1	0	0
FBgn0037415	0	0	5	12	0	1	0	0	0	0	0	0	0	0	0	0	0	1	0	0	0	0	0
FBgn0037416	917	63	3350	8492	2	9	1	5	6	1	5	7	4	8	22	14	6	8	15	18	15	22	15
FBgn0037417	0	0	36	34	0	0	0	0	0	0	0	0	0	0	2	0	0	1	1	0	0	0	2
FBgn0037418	0	0	0	0	0	1	0	1	2	0	3	2	2	2	10	8	0	3	4	15	15	11	10
FBgn0037419	0	1	1	1	1	2	6	5	1	2	3	3	6	11	37	20	16	15	21	30	30	28	41
FBgn0037420	7	455	55	4	163	149	33	38	223	1	6	489	12	0	122	19	69	81	15	9	614	49	6
FBgn0037421	0	2	1	0	0	0	0	0	0	0	1	0	0	0	0	0	0	0	0	0	0	0	3
FBgn0037422	2	1	2	5	2	1	0	2	0	0	1	0	0	1	3	1	0	1	4	2	1	6	5
FBgn0040279	1160	74	1437	12701	26	20	2	16	3	13	24	8	14	7	6	9	4	12	5	1	10	2	0
FBgn0037424	1403	396	10614	13363	7	5	0	1	1	0	0	6	0	1	0	0	0	0	0	1	0	2	0
FBgn0286874	0	0	7	12	0	0	0	0	0	0	0	0	0	0	0	0	0	0	0	3	0	0	0
FBgn0051561	0	0	0	2	0	0	0	0	0	0	0	0	0	2	0	0	0	0	0	0	0	0	0
FBgn0267690	3	0	21	22	0	1	0	0	0	0	0	0	0	0	0	0	0	0	0	0	0	0	0
FBgn0051560	0	0	0	0	0	0	0	0	0	0	0	0	0	0	0	0	0	0	0	0	0	0	0
FBgn0037427	127	7	26	1271	2	8	10	14	6	7	14	24	18	9	36	55	34	65	50	49	35	91	103
FBgn0037428	639	47	3458	4257	0	0	0	0	0	0	0	0	0	0	0	0	0	0	0	0	0	0	0
FBgn0037429	888	187	7163	7262	0	1	10	9	1	0	0	0	0	0	0	0	2	0	0	1	0	0	0
FBgn0037430	1206	279	12981	10562	1	0	0	0	0	0	1	0	1	0	0	2	0	0	2	3	3	1	0
FBgn0037431	1	0	9	3	0	0	0	0	0	0	1	0	0	0	0	0	1	1	0	0	0	0	0
FBgn0037432	14	22	27	10	56	148	101	150	41	64	285	181	206	234	814	799	284	610	804	947	644	1198	1240
FBgn0037433	127	116	225	339	53	72	21	106	86	39	26	43	17	42	91	43	100	38	103	51	104	45	42
FBgn0261789	2602	1753	1486	1978	1608	1505	1137	1315	926	548	1267	980	902	769	867	867	995	858	845	656	986	574	675
FBgn0037435	337	308	205	219	239	207	156	182	114	69	140	124	96	91	119	109	108	101	122	84	91	80	65
FBgn0037436	0	1	1	1	0	1	0	0	0	0	0	0	0	0	1	0	0	0	3	0	1	0	1
FBgn0267698	1930	1603	1277	1442	979	1574	867	1223	953	592	637	894	850	883	1005	1087	942	1157	956	829	730	1091	1041
FBgn0261641	2129	2123	1442	1776	1322	1879	1478	1468	984	887	1006	1398	1320	1352	1941	1630	1765	1498	1866	1376	1581	1626	1710
FBgn0037439	2375	1811	1446	1570	1434	1266	977	970	838	540	865	814	801	606	516	419	575	468	451	347	451	379	421
FBgn0037440	3945	2996	3809	3650	3415	4212	3956	3297	3141	3780	4728	4891	4248	4009	2769	3836	3599	4640	2530	2428	3463	2146	2565
FBgn0260766	14	12	6	18	12	16	20	10	14	26	18	20	16	17	21	12	13	17	13	13	22	15	27
FBgn0261006	0	0	0	0	0	0	0	0	0	0	0	0	0	0	0	0	0	0	0	0	0	0	0
FBgn0027514	602	414	313	380	288	392	262	359	174	124	246	282	257	247	353	411	278	351	356	315	281	344	337
FBgn0260645	1	0	0	1	2	0	0	0	0	0	0	0	0	0	1	0	0	0	0	1	3	2	0
FBgn0010282	2717	2239	2030	2289	2121	2281	2001	1959	1370	1186	2180	1884	1768	1511	2090	2244	1677	2138	1766	1780	1696	1802	1945
FBgn0037442	1730	1607	1198	1237	980	1583	1024	1385	872	836	1079	1393	1244	1215	1639	1671	1373	1680	2123	2207	1377	2701	2224
FBgn0037443	2737	2006	2470	2774	2328	2105	1535	1766	1599	866	908	1171	1054	1002	918	882	924	811	1332	1223	1003	1393	1001
FBgn0264495	2384	2208	1491	1549	1069	2637	1585	1882	1110	829	1165	1841	1969	2184	4200	3977	2094	3388	3134	3392	2207	5804	5940
FBgn0264787	0	0	0	0	0	5	3	16	0	4	27	15	16	21	82	106	22	64	181	197	76	78	92
FBgn0037445	1846	1502	1031	1177	992	1463	992	1223	910	639	579	1084	970	948	1070	1108	788	1114	1039	1007	695	1284	1060
FBgn0283558	0	0	0	0	0	0	0	0	0	0	0	0	0	0	0	0	0	0	0	0	0	0	0
FBgn0037446	1000	854	606	688	651	849	531	749	359	291	650	574	573	553	1042	951	688	838	1002	879	740	1030	1099
FBgn0037447	324	382	1397	1344	242	448	103	299	357	106	54	176	79	154	62	62	137	66	71	77	215	27	20
FBgn0037448	38	25	19	58	26	31	22	53	14	23	21	26	17	29	38	47	43	49	40	34	36	46	40
FBgn0011919	0	0	0	0	0	0	0	0	0	0	0	0	0	0	0	0	0	0	0	0	0	0	0
FBgn0037449	436	245	183	251	135	190	118	182	66	45	114	126	120	119	236	278	89	205	210	197	110	226	242
FBgn0053202	27	149	134	164	52	86	7	28	38	28	25	9	41	55	58	17	113	18	68	65	61	45	39
FBgn0046873	1	6	5	2	27	55	52	66	18	25	156	106	109	116	569	466	206	372	582	610	451	785	817
FBgn0267807	2	4	0	0	0	6	0	0	0	2	4	0	4	5	18	12	5	14	13	9	13	21	14
FBgn0037454	18	43	17	1	77	186	162	216	77	90	442	389	321	370	1662	1604	591	1304	1821	2005	1444	2501	2386
FBgn0037455	0	4	10	0	29	64	40	71	20	30	201	127	119	145	806	710	265	528	830	968	668	1153	1163
FBgn0267806	0	1	0	0	0	2	1	0	0	2	14	4	0	2	44	36	15	22	58	71	43	79	75
FBgn0037456	13	21	12	9	33	77	70	77	14	16	94	91	82	84	542	476	160	334	670	706	426	847	701
FBgn0051482	2	24	22	9	45	156	109	189	45	61	291	205	161	190	767	808	264	595	927	1096	783	1081	1077
FBgn0250846	105	97	87	56	122	345	226	344	109	85	398	327	269	340	1004	996	378	884	1077	1185	805	1225	1362
FBgn0037460	23	52	45	9	92	280	207	243	93	74	492	344	283	390	1395	1270	512	1058	1569	1819	1298	1966	1911
FBgn0037461	154	175	150	91	199	542	353	623	142	119	710	544	533	515	1951	1949	704	1554	1966	2254	1575	2437	2484
FBgn0037462	0	2	2	0	5	14	8	8	1	2	64	19	24	29	230	172	71	122	271	297	256	399	352
FBgn0051286	0	7	11	0	40	121	97	142	58	53	304	265	203	249	1142	1010	409	869	1116	1295	836	1636	1505
FBgn0026565	491	147	512	431	167	176	125	365	243	114	130	25	37	82	27	117	105	74	41	48	63	34	48
FBgn0010355	2209	1859	1494	1818	1347	2079	1412	1469	1199	929	1048	1473	1451	1485	1778	1574	1411	1536	1472	1382	1210	1733	1910
FBgn0026566	3424	2338	2184	2438	1513	1867	1517	1628	1143	800	1650	1388	1152	1044	1346	1510	960	1225	1218	1164	1103	1257	1405
FBgn0262801	9227	7512	7999	9259	6761	8646	9557	7798	5422	6871	11985	10121	7726	6641	7683	7395	8247	7509	5851	4116	6107	3755	4339
FBgn0024912	140	100	71	112	60	68	66	54	26	42	45	40	32	30	60	49	58	58	63	58	97	51	52
FBgn0002522	17	15	10	6	6	24	23	100	9	2	21	20	12	16	47	65	29	31	56	66	24	68	65
FBgn0000552	0	0	1	1	0	0	0	0	0	0	1	0	1	1	0	0	1	0	0	0	0	0	2
FBgn0004777	1383	2662	5035	1521	659	336	196	946	1271	35	53	146	96	53	0	8	10	0	1	1	137	6	3
FBgn0004778	8	44	80	18	7	3	0	17	0	0	0	0	0	0	2	3	0	1	3	2	9	6	0
FBgn0004779	1528	2356	2982	913	1252	83	7	4	4	0	2	0	0	0	0	0	0	0	0	0	0	0	0
FBgn0004780	116	582	833	163	44	4	1	5	3	0	0	2	0	0	6	1	1	1	1	2	39	10	3
FBgn0004781	0	1	9	18	0	0	0	0	0	0	1	0	0	0	0	0	0	0	0	0	6	0	0
FBgn0063127	0	155	14	23	46	16	29	0	0	121	81	0	107	467	813	146	1074	41	1192	451	753	136	41
FBgn0004782	18	123	70	18	10	13	3	51	100	0	2	3	2	0	3	2	2	0	1	1	150	12	0
FBgn0004783	10	105	78	8	5	2	1	11	6	0	2	0	0	3	7	5	0	2	10	1	37	6	5
FBgn0051481	0	10	5	3	3	9	4	8	6	4	16	8	10	14	45	42	17	24	44	37	19	54	71
FBgn0004054	0	0	0	0	0	0	0	0	0	0	0	0	0	0	0	0	0	0	1	1	0	0	1
FBgn0085326	0	0	0	0	0	0	0	0	0	0	0	3	0	0	2	1	0	0	0	0	0	0	0
FBgn0004053	3	1	0	1	0	0	1	0	0	1	2	0	1	0	0	2	3	4	4	2	5	2	5
FBgn0000166	13	3	0	7	3	3	3	0	2	0	0	3	0	1	1	1	1	3	2	3	6	9	13
FBgn0267153	0	13	2	2	2	9	3	7	0	2	11	11	9	10	86	32	20	27	227	283	76	456	138
FBgn0000071	93	346	124	170	178	137	32	41	43	88	98	92	113	300	2695	341	663	371	10949	10640	2638	11987	6075
FBgn0266235	0	0	0	0	1	1	0	0	0	0	0	0	0	0	1	0	0	0	5	4	0	2	3
FBgn0261638	0	3	1	1	0	6	1	3	0	0	3	0	1	3	0	2	6	1	9	7	3	2	1
FBgn0262174	0	0	0	0	0	0	0	0	0	0	0	0	0	0	0	0	0	0	0	0	0	0	0
FBgn0263383	13	5	6	1	13	28	14	9	4	3	18	19	13	27	36	39	23	45	24	21	27	35	43
FBgn0000439	0	10	8	7	3	4	2	2	0	1	5	3	1	5	5	4	18	3	9	10	12	5	11
FBgn0261503	0	2	1	9	0	2	0	17	0	4	0	0	0	0	0	0	1	0	1	3	0	0	0
FBgn0262424	0	0	0	0	0	0	0	0	0	0	0	0	0	0	0	0	0	0	0	0	0	0	0
FBgn0267575	2	0	1	0	2	0	4	5	1	1	0	0	2	0	0	0	0	1	0	0	1	3	0
FBgn0051485	3	1	0	2	0	0	0	0	0	0	0	0	0	0	0	1	2	0	0	0	0	0	1
FBgn0026162	0	0	0	0	0	0	0	0	0	0	0	0	0	0	0	0	0	0	0	0	0	0	0
FBgn0261504	0	0	0	2	0	2	5	6	1	0	0	2	0	0	1	6	3	0	3	0	2	5	4
FBgn0026163	0	0	0	0	0	0	0	0	0	0	0	0	0	0	0	0	0	0	0	0	0	0	0
FBgn0026164	0	0	0	0	0	0	0	0	0	0	0	0	0	0	0	0	0	0	0	0	0	0	0
FBgn0000003	2	0	0	2	1	1	4	9	0	1	1	0	0	1	0	3	0	1	2	4	0	1	3
FBgn0011904	0	0	0	0	0	0	0	0	0	0	0	0	0	0	0	0	0	0	0	0	0	0	0
FBgn0003339	1	47	37	26	11	16	14	7	25	25	17	19	23	25	38	6	97	14	140	22	94	26	4
FBgn0267561	0	0	0	0	0	4	1	6	0	1	7	0	1	0	17	12	7	12	25	30	14	38	15
FBgn0267562	0	0	0	0	0	0	0	0	0	0	0	0	0	0	0	0	0	0	0	0	0	0	1
FBgn0267563	0	0	0	0	0	0	0	0	0	0	0	0	0	0	0	0	0	0	0	0	0	0	0
FBgn0267564	0	0	0	0	0	1	0	0	0	0	0	0	0	1	0	0	0	0	0	0	0	0	0
FBgn0267565	0	0	0	0	0	0	0	0	0	0	0	0	0	1	0	0	0	0	0	1	0	0	0
FBgn0267560	0	0	0	0	0	0	0	0	0	2	0	0	0	0	0	1	0	0	2	0	2	0	1
FBgn0001077	1	2	0	2	2	5	5	8	1	0	16	5	5	5	39	23	10	15	21	24	26	58	54
FBgn0266236	0	0	0	0	0	0	0	0	0	0	0	0	0	0	0	0	1	1	0	0	1	1	1
FBgn0267119	0	3	3	1	2	1	0	1	3	1	2	3	2	1	3	3	18	4	26	9	10	7	3
FBgn0266237	10	15	18	15	13	18	11	21	14	7	19	22	20	16	10	16	14	4	11	12	6	17	16
FBgn0260642	241	531	481	317	509	397	315	333	431	300	306	427	510	418	157	153	308	199	294	345	292	439	203
FBgn0262897	0	6	1	3	1	8	11	6	4	0	14	18	3	11	63	62	10	37	53	74	47	82	93
FBgn0267559	0	0	0	0	0	0	0	1	0	0	0	0	0	0	0	0	0	0	0	0	2	0	0
FBgn0266238	0	0	0	0	0	0	0	0	1	0	0	2	2	0	1	0	0	0	0	0	2	2	0
FBgn0024289	12962	8584	9314	6911	9950	9118	6762	6938	7560	2136	4496	2978	2870	2417	857	2124	1485	1256	1191	746	864	854	1406
FBgn0026563	176	285	460	271	214	724	340	583	330	308	843	839	856	987	3532	3371	1167	2509	3239	3829	2379	5218	5117
FBgn0019828	45	119	96	38	228	634	392	570	172	200	951	786	671	829	3023	2963	1161	2216	3078	3777	2565	4787	4004
FBgn0037463	116	159	93	60	139	346	218	390	134	103	503	400	350	410	1497	1472	560	1124	1520	1773	1283	1982	1994
FBgn0037464	200	216	184	105	228	666	418	496	227	175	706	631	586	680	2455	2280	865	1917	2235	2637	1819	3268	3297
FBgn0037465	1791	1698	1619	1631	1797	1975	1629	1731	1422	1226	1714	1875	1392	1306	1898	1502	1550	1531	1714	1612	1640	1356	1227
FBgn0037466	958	820	598	645	544	716	536	626	419	320	336	504	457	493	725	463	566	456	585	523	520	598	419
FBgn0037467	2243	2041	2228	2386	1587	2381	1935	1657	1389	1356	2054	2155	1820	1696	2021	1989	2342	2259	1922	1519	1699	1528	1662
FBgn0267568	1	2	1	2	1	4	9	1	2	1	0	0	4	1	12	10	15	10	16	4	3	11	6
FBgn0037468	2568	2377	1455	2145	1773	1704	1237	1621	1368	811	1482	1384	1152	1194	2596	1687	2784	1795	2909	2445	2845	2399	1699
FBgn0010774	5400	4390	3417	3813	3247	3753	2911	3381	2218	1494	2801	2603	2353	2460	3360	3012	2729	2740	3046	2800	2876	3027	2770
FBgn0037469	924	620	482	583	452	707	501	608	346	190	548	425	375	380	736	655	444	629	764	725	543	682	729
FBgn0037470	1406	1401	1303	1288	1266	1269	1182	1224	980	799	1157	1176	1047	866	1383	1152	1209	1113	1417	1367	1237	1688	1618
FBgn0267567	8	11	8	11	5	7	5	12	6	3	9	13	12	8	2	2	4	4	7	12	8	6	5
FBgn0003884	71155	62994	60049	65368	57191	59313	42932	58696	42632	28767	52022	45255	38958	37949	47358	42491	46280	42651	43098	42119	44264	41067	41877
FBgn0263768	266	210	209	195	218	254	206	233	154	80	248	193	165	225	313	299	261	270	337	332	279	347	347
FBgn0040670	134	127	51	87	68	172	107	177	59	36	174	151	129	129	460	423	154	356	408	463	326	529	494
FBgn0261238	906	954	523	734	501	736	426	551	313	328	390	485	522	729	907	591	1006	593	761	699	566	975	868
FBgn0267566	0	0	0	0	0	0	0	0	0	0	0	0	0	0	0	0	0	0	0	0	0	0	0
FBgn0014863	653	793	3189	2944	480	1230	190	716	921	336	108	621	158	328	388	154	402	207	18	59	1140	122	21
FBgn0037472	398	412	281	341	260	341	207	299	209	182	331	321	242	277	615	529	632	497	727	589	594	508	517
FBgn0037473	947	914	880	748	666	948	631	737	625	426	565	725	511	504	453	447	398	458	407	399	359	427	337
FBgn0262149	175	102	82	107	77	133	74	156	54	34	93	77	54	85	135	148	77	132	140	125	106	150	128
FBgn0051248	769	742	934	622	1207	922	841	849	920	490	940	662	564	409	52	82	72	117	30	28	67	24	25
FBgn0051494	0	0	2	0	0	0	1	3	1	0	0	0	0	1	0	0	0	0	0	0	2	0	0
FBgn0051491	0	0	0	0	0	0	0	0	0	0	0	0	0	0	0	0	0	0	0	0	0	0	0
FBgn0051493	3	1	2	3	0	1	1	1	0	0	3	0	0	0	0	0	0	0	0	0	0	0	0
FBgn0037475	9	32	19	29	22	16	8	7	7	19	16	5	28	25	65	20	64	18	60	24	32	20	18
FBgn0261702	1	0	0	0	1	5	4	3	3	1	6	8	6	15	25	44	18	30	22	18	24	51	50
FBgn0037477	7	14	8	5	21	11	17	33	30	14	11	32	19	20	73	48	28	53	81	65	42	53	46
FBgn0037478	860	542	402	490	376	409	306	387	190	144	329	258	244	233	355	390	245	353	392	432	344	314	347
FBgn0250732	915	914	781	905	590	820	518	564	437	383	503	646	622	629	768	763	741	786	790	602	559	767	869
FBgn0011020	625	432	240	345	247	286	171	260	141	78	182	158	178	200	287	271	234	206	249	182	189	202	236
FBgn0037481	440	312	253	252	214	250	225	260	144	102	249	203	188	188	248	260	196	248	300	222	213	245	285
FBgn0267569	1	1	3	3	1	0	2	1	0	1	0	0	0	1	0	0	0	0	0	4	3	0	0
FBgn0002306	748	1029	981	1816	524	992	388	852	578	316	357	536	449	688	1090	981	789	899	910	660	801	993	1047
FBgn0037482	1575	1277	965	991	901	1312	919	1211	593	433	991	1030	995	1102	2141	2260	1171	1812	1960	2151	1760	2624	2614
FBgn0086372	1809	1971	1377	1422	1294	1939	1251	1615	1040	887	903	1443	1438	1415	1592	1488	1473	1572	2117	2110	1575	2444	1752
FBgn0037483	23	35	20	11	57	189	112	177	57	81	346	287	231	307	1655	1475	486	1019	1661	1829	1238	2434	2330
FBgn0250845	154	176	182	75	268	669	411	715	212	189	1129	734	663	784	3368	2953	1176	2468	3441	4079	2913	5022	4564
FBgn0037485	1782	1204	1773	1594	894	1153	1003	1642	598	468	562	766	570	423	299	350	330	381	274	493	263	485	346
FBgn0037486	13	31	35	6	65	162	114	170	58	70	258	245	181	221	964	887	285	751	999	1323	712	1345	1158
FBgn0037487	19	134	92	104	21	58	9	40	56	27	14	35	34	24	69	44	61	32	46	33	123	62	54
FBgn0037488	0	0	0	0	0	0	0	0	0	0	2	0	0	1	2	0	1	1	1	2	4	2	2
FBgn0037489	1845	1285	1001	1227	942	1047	794	795	540	382	596	588	620	530	623	633	469	578	571	442	440	548	622
FBgn0037490	295	210	152	217	167	237	181	238	112	103	289	188	153	195	417	461	263	387	421	460	331	456	455
FBgn0037491	1046	716	672	770	801	585	512	628	479	357	520	519	405	328	186	254	313	272	221	200	259	198	192
FBgn0037492	489	357	324	318	346	312	223	218	213	137	194	180	177	131	78	116	109	89	68	85	79	62	89
FBgn0011282	0	0	0	0	1	0	0	3	0	0	1	0	1	1	2	0	0	3	0	2	0	4	7
FBgn0001112	8	31	55	104	7	12	4	4	6	9	11	12	6	8	41	8	38	17	36	168	60	47	39
FBgn0265426	0	0	0	0	0	1	0	0	4	0	1	0	0	0	5	2	1	0	0	1	4	6	1
FBgn0028400	50	484	293	268	153	212	39	47	96	80	69	32	172	254	303	98	509	80	417	274	288	187	164
FBgn0037493	0	0	0	0	0	0	0	0	0	0	0	0	0	0	0	0	0	0	0	0	0	0	0
FBgn0267337	4	94	19	14	28	68	16	8	7	52	25	58	43	164	160	51	281	61	192	135	166	65	53
FBgn0265421	0	0	0	0	0	0	0	1	0	0	0	1	0	0	5	1	0	3	2	3	5	13	7
FBgn0045843	27	18	16	14	26	71	36	54	13	21	82	85	67	89	341	320	150	239	426	434	227	579	499
FBgn0260713	0	0	0	0	0	0	0	0	0	0	0	0	0	0	0	0	0	0	0	0	0	0	0
FBgn0265422	0	0	0	0	4	12	0	0	0	0	0	6	0	2	17	2	19	4	3	0	16	1	0
FBgn0267805	0	0	0	0	0	0	0	0	0	0	0	0	0	0	0	0	0	0	0	0	0	0	0
FBgn0037498	0	0	0	0	0	0	0	0	0	0	0	0	0	0	1	1	0	0	1	1	0	0	0
FBgn0283626	0	0	0	0	0	0	0	0	0	0	0	0	0	0	0	0	0	0	0	0	1	0	0
FBgn0267944	0	0	0	0	0	0	0	0	0	0	0	1	1	0	2	0	0	1	0	3	1	0	0
FBgn0265423	1	3	8	0	8	14	9	20	6	6	37	25	20	21	152	134	59	93	134	153	129	210	196
FBgn0265424	0	0	0	0	0	0	0	0	0	0	0	0	0	0	0	0	0	0	1	0	0	0	0
FBgn0265425	5	0	3	0	1	2	2	2	0	3	6	12	4	11	35	31	16	23	27	50	35	45	59
FBgn0051496	305	2280	1168	1658	781	1996	2751	540	920	2218	4485	4033	3687	2030	4188	2350	5492	2737	3050	1442	2536	1632	1258
FBgn0051501	0	2	1	0	17	41	21	56	11	17	118	126	86	103	614	483	231	394	691	835	582	938	930
FBgn0262982	31	40	26	20	58	115	52	98	30	31	170	102	83	133	357	380	151	321	427	488	344	519	403
FBgn0037500	3	2	5	1	13	53	36	52	19	20	142	104	75	92	453	471	183	387	615	655	461	690	703
FBgn0004175	44	77	62	31	96	287	210	307	91	69	566	313	260	349	1466	1310	515	1067	1738	1934	1384	1974	1893
FBgn0004174	43	101	66	45	132	352	216	381	94	98	790	452	381	487	1984	1763	700	1478	2333	2619	1909	2747	2589
FBgn0004173	62	40	86	43	114	280	188	186	165	71	510	267	265	399	1466	1279	633	986	1276	1353	1751	2867	2443
FBgn0004172	72	96	116	55	171	478	363	509	155	148	957	521	459	537	2541	2367	874	1992	2865	2971	2095	3342	3440
FBgn0015770	1	0	0	0	0	0	4	4	0	0	3	3	4	5	9	13	2	5	8	14	13	17	13
FBgn0267120	0	0	0	0	0	3	0	0	0	0	2	2	0	6	23	24	4	13	36	53	23	53	47
FBgn0261502	4	16	3	2	17	47	46	71	9	30	112	85	78	51	409	357	105	262	509	597	264	320	320
FBgn0037501	1	0	0	1	0	0	1	0	0	0	0	0	0	0	1	1	1	0	0	0	1	5	1
FBgn0283627	0	1	0	0	0	2	0	0	0	0	1	0	1	1	2	2	4	1	6	1	2	1	5
FBgn0037502	20	25	51	2	83	220	139	179	100	60	295	294	238	328	1151	1199	461	922	1348	1574	1101	1799	1738
FBgn0037503	33	45	12	48	17	28	1	3	22	2	6	20	6	12	39	14	79	17	19	16	43	24	12
FBgn0011999	0	0	0	0	0	0	0	0	0	0	0	0	0	0	0	0	0	0	0	0	0	0	0
FBgn0263565	0	0	0	0	0	0	0	0	0	0	0	0	0	0	0	0	0	0	0	0	0	0	0
FBgn0011998	0	0	0	0	0	0	0	0	0	0	0	0	0	0	0	0	0	0	0	0	0	0	0
FBgn0266239	0	1	2	0	9	4	2	2	1	4	13	7	7	4	41	37	24	30	40	30	50	100	63
FBgn0012000	0	0	0	0	0	0	0	0	0	0	0	0	0	0	0	0	0	0	0	0	0	0	0
FBgn0037504	1017	877	676	694	662	553	496	535	415	243	494	362	379	336	461	376	441	352	462	377	424	418	395
FBgn0043853	4	2	8	9	4	9	8	16	2	3	4	4	1	4	6	5	10	7	4	2	2	1	0
FBgn0065099	6	5	5	6	7	3	29	98	6	2	3	13	3	1	9	16	4	5	7	11	3	5	3
FBgn0012001	0	0	0	0	0	0	0	0	0	0	0	0	0	0	0	0	0	0	0	0	0	0	0
FBgn0015569	926	668	1113	743	929	1206	851	851	920	552	607	688	675	766	482	668	483	737	452	555	465	629	630
FBgn0261508	1	115	20	41	63	33	2	306	52	50	5	3	0	27	64	39	101	21	1	168	20	9	7
FBgn0015577	1159	1118	1386	1386	1274	877	638	824	766	353	265	479	541	483	193	186	262	186	207	242	287	251	120
FBgn0037506	3	17	9	11	24	84	73	145	37	58	302	197	176	186	1012	1020	346	682	1029	1338	818	1547	1509
FBgn0015576	1618	1308	923	1401	894	644	796	620	754	726	1226	1866	1131	1247	1431	1709	1203	1494	795	1173	1184	1188	1019
FBgn0017456	31	47	44	25	57	108	80	133	57	46	222	137	119	144	537	488	227	431	514	588	391	730	738
FBgn0015575	7560	7128	7475	6815	9128	8269	6463	5679	7240	4279	6795	6646	6170	4935	1704	2446	2409	3538	2610	2326	2387	2742	2203
FBgn0015574	249	252	153	142	178	469	246	405	165	95	441	371	400	375	1004	1191	415	949	1087	1185	763	1416	1561
FBgn0027934	1216	823	589	1199	622	830	538	1495	371	213	587	399	306	112	41	127	130	77	7	17	51	15	7
FBgn0015831	49	69	65	13	96	271	173	310	106	68	445	370	358	390	1564	1511	597	1110	1524	1780	1355	2224	1992
FBgn0003885	6510	5174	4309	4789	4172	4101	2874	3786	2716	1604	3176	2605	2600	2529	3835	3083	2445	2718	3397	3765	3011	4198	4503
FBgn0261393	1828	1169	1470	1519	1505	1306	758	1600	1090	586	723	629	513	563	432	635	610	610	420	539	494	459	488
FBgn0015572	755	173	652	368	356	299	216	556	415	303	233	148	91	255	106	381	334	232	146	138	222	140	99
FBgn0267803	42	16	20	10	13	26	16	24	7	5	19	12	11	18	29	36	20	33	26	22	22	29	16
FBgn0015571	1422	907	755	692	818	1104	728	1307	698	582	948	901	740	835	1688	1971	1099	1614	1913	2316	1673	2502	2615
FBgn0015570	752	1354	1283	1337	2540	2178	2091	1828	2090	2845	3760	4796	2846	3252	1722	4377	3897	6014	1076	1022	3300	1088	1261
FBgn0267804	4	6	4	3	7	9	10	0	17	1	2	1	3	3	2	2	4	4	0	4	1	9	8
FBgn0015568	2981	2804	3682	2084	3736	3814	3015	2518	3567	1890	3033	2776	2357	1903	559	936	1146	1499	655	691	764	793	677
FBgn0267105	0	0	0	1	0	0	1	4	0	0	2	0	1	1	6	3	0	2	3	1	3	3	8
FBgn0083963	4	106	56	60	34	89	36	65	44	28	68	46	79	70	158	172	116	137	156	174	102	260	252
FBgn0265420	1	2	0	4	1	6	2	12	5	0	13	9	11	4	39	31	16	17	45	32	15	39	39
FBgn0051146	25	22	36	40	16	31	11	14	27	13	24	29	29	48	59	65	40	62	63	65	44	81	96
FBgn0265200	0	0	0	0	0	0	1	0	0	0	0	0	0	0	0	0	0	0	0	0	0	0	0
FBgn0037512	296	176	142	130	140	342	209	316	114	79	354	273	230	218	775	829	297	699	736	852	669	986	1162
FBgn0262899	0	0	0	0	0	0	0	0	0	0	0	0	0	1	0	0	0	0	0	0	0	0	0
FBgn0266240	0	0	0	0	0	0	0	0	0	0	1	0	0	1	9	1	2	0	4	7	8	25	13
FBgn0037513	2039	1936	1879	1863	1958	1622	1065	1164	1160	557	1029	1053	782	631	404	483	452	462	445	541	580	513	588
FBgn0037514	12	40	34	6	72	170	119	270	63	61	286	224	191	247	937	865	301	664	889	1003	713	1294	1311
FBgn0037515	4257	3260	3681	4094	2052	2387	2448	1810	1891	943	1496	1290	1274	953	2067	1138	668	1022	2576	3164	1676	3830	2758
FBgn0037516	0	0	0	0	0	3	2	4	0	3	26	7	6	9	60	56	17	22	55	73	48	104	90
FBgn0267945	0	0	0	0	0	1	0	2	1	0	0	0	0	0	8	2	2	8	4	0	3	6	2
FBgn0267946	0	0	0	0	0	3	0	0	0	1	0	1	0	1	6	6	1	3	8	2	1	8	8
FBgn0042104	795	367	458	430	307	276	293	345	245	171	147	141	183	191	48	114	114	113	60	46	91	55	42
FBgn0042102	792	198	279	245	214	265	222	393	279	177	131	90	82	153	38	180	160	98	81	149	113	194	80
FBgn0042105	269	25	168	54	71	75	75	133	101	44	28	10	17	27	7	37	44	22	11	32	25	22	6
FBgn0042103	90	52	28	57	50	51	44	83	46	30	19	17	19	21	15	26	15	22	8	15	17	34	18
FBgn0037517	1423	931	969	1004	880	918	506	1088	654	380	352	499	416	394	231	357	241	317	294	360	266	399	395
FBgn0037518	285	322	294	280	338	296	274	322	277	251	385	443	362	272	421	388	360	490	676	576	496	719	699
FBgn0042101	41	5	143	31	35	56	16	27	131	23	11	5	5	29	2	47	46	31	7	7	28	4	5
FBgn0037519	215	156	146	136	155	241	121	234	116	46	55	82	65	73	43	57	54	46	39	50	28	34	42
FBgn0037520	219	191	155	184	225	275	147	233	149	69	58	115	88	93	44	76	74	60	25	81	79	60	61
FBgn0037521	47	215	118	143	53	94	14	40	67	34	27	9	83	91	86	25	172	25	151	91	127	92	87
FBgn0051472	1504	1245	1139	1047	1173	1377	949	1187	1028	621	1012	1045	735	702	817	904	925	867	760	640	826	619	591
FBgn0051473	98	99	99	68	88	256	192	233	74	69	399	258	254	295	851	924	344	720	981	1062	762	1282	1341
FBgn0085413	492	438	296	318	169	292	163	223	107	71	107	127	164	215	361	326	259	261	276	270	203	449	429
FBgn0037525	167	704	448	390	312	387	181	184	234	236	167	154	302	388	301	130	558	119	369	233	352	257	170
FBgn0267802	0	0	0	0	1	0	1	0	0	3	2	0	0	0	9	9	7	8	12	10	21	34	23
FBgn0037526	603	426	430	444	341	395	324	403	288	193	221	263	218	220	221	192	183	203	165	130	179	161	166
FBgn0037529	4979	3345	3401	4192	2924	3028	2590	2890	2212	1042	1847	1466	1517	1211	1006	1044	1029	1014	1012	899	966	814	935
FBgn0260005	1121	690	796	951	568	789	601	538	404	531	304	609	501	371	120	253	290	235	191	250	195	233	198
FBgn0037530	7658	6493	6626	6408	4475	6996	4940	4452	4235	2954	3439	4278	4196	3720	3692	4160	2838	4059	3573	3685	2806	4611	4814
FBgn0024909	541	389	302	317	255	370	229	315	165	134	267	237	212	178	356	397	260	324	449	445	360	435	431
FBgn0004901	1140	1009	857	894	620	686	568	491	470	285	406	406	392	364	292	306	328	267	327	165	306	203	191
FBgn0014930	1822	1497	1475	1347	1422	1447	1061	1256	1142	744	1436	1215	923	750	501	628	846	737	450	387	656	323	356
FBgn0014931	197	162	153	143	161	141	129	113	142	78	100	138	105	112	105	90	82	113	142	133	126	130	122
FBgn0037531	273	258	140	193	161	235	142	184	85	71	131	144	116	131	144	167	107	157	163	168	93	103	139
FBgn0002542	1402	1068	637	800	681	1119	733	950	352	323	598	831	751	794	1510	1513	941	1301	1427	1395	1061	1654	1871
FBgn0261453	0	0	0	0	0	0	0	2	0	0	0	0	0	0	0	0	1	0	1	0	0	0	0
FBgn0000504	340	277	288	160	303	425	369	394	353	215	197	349	288	239	170	177	176	247	238	266	229	246	231
FBgn0037533	12608	10756	9508	13091	6698	9781	6659	5641	7562	3113	4051	3639	4325	4088	2812	2507	3949	2711	3469	2634	2967	3469	2407
FBgn0010401	0	0	1	0	0	0	1	1	0	0	1	2	0	4	4	2	3	1	9	2	6	5	1
FBgn0259974	0	0	0	0	0	0	0	0	0	0	0	0	0	0	0	0	0	0	1	0	2	0	0
FBgn0037534	257	148	4176	3862	95	124	51	152	71	76	67	53	61	72	77	56	69	52	33	30	76	48	17
FBgn0267818	0	0	3	7	0	0	0	0	0	0	1	0	0	1	0	0	0	3	1	1	1	0	0
FBgn0267817	0	1	2	3	0	0	0	1	2	0	9	6	8	4	32	19	15	22	30	21	19	40	26
FBgn0037535	565	317	315	308	248	355	245	363	170	115	245	231	190	203	258	287	181	248	244	213	203	210	227
FBgn0266598	119	156	70	102	99	77	64	79	46	38	79	59	56	70	108	54	132	73	134	77	98	84	53
FBgn0037536	2002	1936	1632	1617	1237	1998	1383	1502	1169	839	882	1378	1203	1283	1418	1265	1098	1159	1228	1211	1021	1584	1440
FBgn0037537	1351	1539	1588	1786	1856	1652	1524	1641	1226	1278	2459	1956	1649	1334	1639	1454	1431	1570	1571	1548	2001	1475	1357
FBgn0040524	165	100	85	70	105	206	138	255	77	47	233	160	171	191	395	493	184	396	454	463	349	548	501
FBgn0037538	799	697	473	540	504	648	473	629	306	260	573	531	458	527	1223	1083	629	948	1221	1258	957	1429	1350
FBgn0037539	899	751	507	621	506	644	505	669	342	261	458	456	412	399	641	664	462	536	626	598	494	646	681
FBgn0037540	172	140	103	88	66	116	77	106	40	52	50	85	75	71	86	87	83	85	90	80	75	84	89
FBgn0037541	1952	1797	1718	1852	1424	1876	1118	1131	1247	1038	806	1284	1318	1173	760	652	1044	827	1030	857	770	891	667
FBgn0001255	44	42	38	56	25	39	22	13	19	11	27	15	29	42	110	57	58	43	195	92	82	115	64
FBgn0037543	1308	855	762	851	643	644	563	490	459	287	476	404	385	327	287	365	325	327	366	351	330	305	378
FBgn0037544	391	272	260	270	272	249	192	272	167	129	232	152	118	122	281	337	192	225	474	412	321	481	509
FBgn0010812	1181	828	982	946	625	939	577	703	595	392	617	678	561	586	1056	1036	703	847	868	901	743	850	1039
FBgn0266241	0	0	1	3	1	3	3	0	1	0	1	1	0	0	1	3	2	0	1	0	0	0	0
FBgn0262362	1	1	0	2	2	4	4	4	5	11	20	14	11	18	283	75	49	71	395	423	140	355	298
FBgn0263596	0	0	0	0	0	0	0	0	0	0	0	0	2	1	1	0	0	0	0	0	0	2	0
FBgn0262363	0	0	0	0	0	0	0	0	0	0	0	0	0	0	0	0	0	0	0	0	0	1	3
FBgn0037546	7	47	33	40	15	32	4	8	14	13	7	0	7	29	14	6	40	4	21	13	16	13	13
FBgn0086052	0	0	0	0	0	0	0	0	0	0	0	0	0	0	0	0	0	0	0	0	0	0	0
FBgn0037547	7	122	272	235	45	203	80	94	31	47	245	163	137	150	689	569	268	484	641	722	568	873	981
FBgn0265418	118	105	44	98	58	110	94	136	38	19	75	81	71	62	77	128	49	125	100	71	45	78	94
FBgn0037548	1280	1124	1303	1599	870	1537	1235	1143	889	1058	1117	1160	1088	984	478	759	639	831	692	485	645	499	563
FBgn0243512	599	602	519	345	364	385	316	467	351	278	264	306	263	303	315	312	434	238	302	325	301	238	186
FBgn0265419	9	5	13	12	5	12	6	16	12	3	5	7	3	11	5	6	5	3	9	7	9	9	3
FBgn0037549	3424	2242	1523	1967	1412	1920	1248	1506	837	592	1178	1247	1137	925	1489	1359	1040	1240	1302	1157	903	1438	1375
FBgn0037550	780	522	397	553	461	427	310	377	305	178	452	278	259	211	267	245	300	271	224	175	234	195	187
FBgn0037551	1270	1059	952	1052	770	980	713	880	603	598	734	849	682	744	815	723	798	834	1037	1072	816	1133	857
FBgn0051583	0	0	0	0	0	0	0	0	0	0	0	0	0	0	0	0	0	0	0	0	0	0	0
FBgn0011963	0	0	0	0	0	0	0	0	0	0	0	0	0	0	0	0	0	0	0	0	0	0	0
FBgn0011962	0	0	0	0	0	0	0	0	0	0	0	0	0	0	0	0	0	0	0	0	0	0	0
FBgn0011961	0	0	0	0	0	0	0	0	0	0	0	0	0	0	0	0	0	0	0	0	0	0	0
FBgn0011960	0	0	0	0	0	0	0	0	0	0	0	0	0	0	0	0	0	0	0	0	0	0	0
FBgn0011959	0	0	0	0	0	0	0	0	0	0	0	0	0	0	1	0	0	0	1	1	0	0	0
FBgn0001138	98	58	50	154	36	79	43	70	26	46	22	17	21	58	68	17	104	10	77	38	73	71	10
FBgn0262994	0	1	0	2	0	0	2	1	0	0	0	2	1	1	3	0	2	1	0	0	0	1	1
FBgn0262995	0	0	2	0	0	0	1	0	0	3	5	2	3	3	18	13	3	5	6	16	12	13	11
FBgn0261290	0	0	0	0	0	0	0	2	2	0	0	0	0	0	0	0	0	0	2	1	0	0	0
FBgn0037552	2384	2114	2206	1949	1524	1874	1692	1219	1243	1194	1388	1442	1218	1111	551	740	653	861	693	595	570	649	525
FBgn0037553	343	535	615	354	578	797	789	634	546	662	993	1022	724	703	946	801	625	757	1537	1809	949	1760	1613
FBgn0267111	1	0	0	1	0	2	0	0	0	0	1	1	0	1	6	6	3	3	1	2	3	4	3
FBgn0267110	0	1	1	0	2	9	2	3	1	1	6	12	6	12	28	26	12	22	34	40	15	41	50
FBgn0267109	23	6	2	9	5	7	3	4	6	2	8	16	11	20	19	21	9	9	17	13	10	23	15
FBgn0037554	728	456	380	435	333	577	366	520	223	162	340	367	374	327	577	586	383	468	472	431	339	599	607
FBgn0037555	659	568	454	426	465	522	451	562	267	268	444	495	392	404	659	561	622	603	656	601	573	702	583
FBgn0037556	921	807	524	573	439	796	479	680	308	272	432	580	624	629	975	924	739	880	917	816	607	942	1017
FBgn0042182	0	0	0	0	0	0	0	0	0	0	0	0	0	0	0	0	0	0	0	0	0	0	0
FBgn0064126	0	0	0	0	0	0	0	0	0	0	0	0	0	0	0	0	0	0	0	0	0	0	0
FBgn0040528	38	36	24	23	25	40	39	33	25	12	13	17	29	31	50	38	37	42	62	56	44	64	51
FBgn0260386	215	143	729	1873	110	131	69	100	68	32	54	40	64	82	84	63	89	88	66	37	56	39	52
FBgn0037560	139	149	112	118	155	162	91	142	135	84	98	111	75	67	70	93	79	79	78	106	99	82	69
FBgn0010173	2468	1931	1514	1770	1227	1450	938	1151	783	655	919	998	938	982	1411	1166	1230	1175	1456	1331	1160	1455	1544
FBgn0014861	758	766	524	576	557	522	354	374	312	250	358	435	378	398	470	331	635	327	406	282	404	269	274
FBgn0037561	1064	785	608	630	566	480	391	359	315	179	265	270	279	261	198	167	182	161	182	154	180	133	166
FBgn0010433	0	25	1	0	6	1	5	0	1	9	20	5	2	30	39	10	82	3	34	14	29	4	0
FBgn0265377	26	13	18	8	16	7	13	21	12	10	4	2	3	8	1	2	4	4	1	0	4	3	0
FBgn0037562	34	8	92	26	17	20	17	43	33	15	10	3	5	7	2	9	6	8	2	4	2	7	4
FBgn0037563	5532	1358	826	2201	597	1762	45	1132	28	831	1653	46	731	22	1	534	1070	86	269	10	1	0	0
FBgn0051464	1150	242	176	406	122	346	11	291	2	248	441	10	180	3	2	209	338	37	125	7	2	0	0
FBgn0051463	116	2	593	71	36	7	13	23	105	14	18	2	2	151	0	40	5	50	0	0	82	9	1
FBgn0037565	152	112	146	200	66	113	43	96	47	23	24	46	27	43	44	67	35	65	46	44	34	61	76
FBgn0037566	3342	2187	1881	2335	1668	1653	1264	1488	1479	497	807	671	661	578	381	462	348	398	358	312	318	270	350
FBgn0265351	394	266	382	392	199	249	267	257	234	205	350	259	219	209	299	331	442	298	270	222	286	157	202
FBgn0265101	1222	1015	960	999	784	1054	750	971	661	503	1019	870	765	789	1495	1579	963	1299	1600	1604	1337	1739	1751
FBgn0037569	541	406	285	355	308	342	260	370	198	128	343	272	256	241	351	328	264	367	350	288	369	238	320
FBgn0263550	0	0	0	0	0	0	0	0	0	0	0	0	0	0	0	0	0	0	0	0	0	0	0
FBgn0037570	0	0	0	0	0	0	0	0	0	0	0	0	1	0	2	4	2	0	1	5	1	2	1
FBgn0037571	0	4	6	0	6	20	20	27	15	16	100	68	55	79	430	349	164	254	498	558	411	773	758
FBgn0037572	0	1	0	0	1	5	2	7	3	3	31	19	18	20	216	171	64	105	235	304	188	311	306
FBgn0037573	3032	2250	1704	2103	1747	1857	1339	1806	1051	742	1539	1321	1249	1183	1486	1439	1375	1416	1358	1095	1147	1036	1163
FBgn0037574	540	427	435	371	333	389	287	354	282	144	270	238	225	221	317	374	191	285	279	315	264	327	354
FBgn0266742	20	24	23	5	14	20	12	19	5	11	11	9	4	10	0	5	16	12	17	9	9	8	5
FBgn0062412	496	177	365	241	226	175	216	296	166	175	258	271	184	228	472	830	600	475	486	673	704	716	741
FBgn0003129	20	19	8	22	4	25	1	9	3	9	12	11	14	12	18	10	17	12	24	26	26	58	20
FBgn0037576	0	0	0	1	0	0	3	5	1	0	0	0	0	0	3	1	2	1	1	1	1	1	1
FBgn0037577	0	0	0	1	1	0	0	0	0	1	0	0	0	0	0	0	0	0	1	0	0	0	3
FBgn0040529	24423	15819	15804	16911	15622	14476	11084	14860	11998	5898	10839	8997	7495	6467	4600	5916	4993	5063	3682	3880	4814	3090	3579
FBgn0004908	550	383	291	346	293	407	284	381	201	146	344	311	271	264	595	528	351	518	646	554	570	604	651
FBgn0037578	987	676	533	700	492	644	389	486	287	206	370	388	327	352	496	480	353	477	457	438	411	385	463
FBgn0037579	27	36	31	6	42	142	96	164	55	62	278	188	160	213	803	735	288	568	737	840	570	1065	1155
FBgn0037580	13858	10319	9371	10824	8023	9943	7662	8454	5752	4352	8140	6903	6450	5747	8385	8762	6848	8203	7676	7342	6419	8985	9538
FBgn0037581	204	150	107	134	105	176	97	154	63	70	196	150	134	219	640	582	235	467	605	634	452	671	734
FBgn0283560	1	0	0	0	0	0	0	0	0	0	0	0	0	0	0	0	1	0	0	0	0	0	0
FBgn0261108	798	746	576	609	580	662	547	694	572	511	480	707	525	521	524	560	482	542	561	573	467	542	428
FBgn0020249	1488	1317	1378	1463	1235	1276	947	1296	1048	700	924	1047	810	738	746	649	798	579	694	679	755	526	504
FBgn0037583	1478	1022	870	939	739	1006	645	900	462	301	609	670	584	535	645	718	571	729	598	535	448	557	576
FBgn0037584	2	0	3	0	0	6	3	5	0	0	1	3	1	1	7	1	1	1	0	6	0	2	3
FBgn0266801	117	228	139	234	111	339	163	220	119	113	265	240	285	352	964	868	383	669	818	866	587	1322	1438
FBgn0267801	0	0	0	0	0	0	2	0	0	0	0	0	0	2	0	1	2	0	2	2	1	1	1
FBgn0037589	0	0	0	0	2	0	0	0	0	0	0	0	0	0	0	0	0	0	0	0	0	1	1
FBgn0267800	0	0	0	0	0	0	0	0	0	1	3	0	0	3	8	7	3	9	10	22	11	18	15
FBgn0037590	2	1	0	0	0	0	4	1	0	0	0	0	0	2	1	3	0	1	1	2	2	3	1
FBgn0037591	0	1	1	1	0	0	2	0	3	3	0	1	0	1	1	3	0	1	2	1	0	1	1
FBgn0267948	0	0	0	0	0	0	0	3	0	0	0	2	2	3	1	9	1	8	4	3	7	12	7
FBgn0037592	1335	1016	1103	912	942	1236	840	1186	794	548	958	988	798	872	1398	1448	876	1265	2040	2052	1157	2135	1807
FBgn0051454	397	82	201	194	138	185	128	133	95	71	92	30	35	58	11	42	30	26	30	33	38	22	17
FBgn0051259	943	140	502	376	237	253	167	212	141	68	125	24	54	98	4	21	39	7	12	23	17	42	7
FBgn0040531	31	39	54	1	11	3	38	141	20	43	3	13	15	3	0	11	5	1	12	69	11	14	5
FBgn0267135	0	0	1	0	3	2	3	10	4	0	4	0	2	8	19	19	8	17	17	11	8	26	15
FBgn0267134	1	1	2	0	2	3	2	7	2	2	7	5	3	8	21	22	12	23	40	26	22	47	30
FBgn0037594	0	0	0	0	0	0	0	0	0	0	1	0	0	0	0	0	0	0	0	0	0	1	0
FBgn0051453	1360	954	565	757	467	779	467	650	234	183	479	356	338	497	805	612	659	653	771	470	605	516	579
FBgn0051450	1864	1236	1130	1212	1037	920	682	903	770	275	704	446	503	340	535	582	357	422	458	439	444	430	465
FBgn0051460	340	292	222	300	196	330	210	264	160	138	287	254	207	196	319	317	380	320	339	270	297	271	262
FBgn0265318	40	17	14	20	25	46	34	45	19	15	38	47	46	48	125	121	47	108	111	111	93	121	99
FBgn0266916	811	755	435	582	427	777	513	677	363	263	395	496	473	637	959	903	695	852	814	713	693	880	977
FBgn0261929	3	27	8	21	3	17	3	3	12	5	7	5	9	12	4	10	9	6	9	4	1	10	9
FBgn0267799	2	4	3	0	7	15	3	8	2	1	23	16	6	12	50	57	17	35	83	72	44	83	86
FBgn0026399	0	1	0	1	0	0	0	0	0	0	0	0	0	0	0	0	1	0	0	0	0	0	1
FBgn0012028	0	0	0	0	0	0	0	0	0	0	0	0	0	0	0	0	0	0	0	0	0	0	0
FBgn0012027	0	0	0	0	0	0	0	0	0	0	0	0	0	0	0	0	0	0	1	0	1	0	0
FBgn0037601	4	35	25	42	27	42	20	51	31	9	21	31	13	13	38	22	34	19	14	14	70	13	12
FBgn0024326	1539	1531	1264	1299	1333	1269	939	1263	996	856	797	1177	951	943	940	818	1090	904	1014	906	974	973	643
FBgn0037602	296	238	218	293	224	219	194	277	179	69	184	176	126	120	145	126	148	148	114	92	138	106	109
FBgn0000447	2411	1723	1637	1894	1472	1736	1373	1360	1078	943	1725	1533	1329	1158	1927	1934	1373	1839	1986	2037	1781	2308	2442
FBgn0037603	463	387	340	360	257	375	277	350	220	181	437	396	233	217	447	395	552	419	332	253	320	269	299
FBgn0259992	270	207	163	149	210	197	126	275	114	96	354	242	122	142	596	592	1134	721	643	412	609	306	322
FBgn0263231	10374	8926	6385	7647	6788	8019	5551	5890	4770	3381	4162	5450	5493	4953	6853	6503	4911	6059	6317	6171	4770	8036	7845
FBgn0086679	1534	1378	1129	1162	1251	1681	1212	1327	969	805	1218	1503	1234	1122	1468	1688	1201	1572	1515	1527	1087	1717	1702
FBgn0037606	805	713	519	693	471	643	392	520	352	262	335	382	329	381	434	400	385	425	442	388	409	431	440
FBgn0037607	80751	85588	109440	64544	113909	136285	100044	74877	110792	25606	42584	31642	32419	23256	8674	15347	14396	18346	7446	6304	10532	7270	8058
FBgn0012026	0	0	0	0	0	0	0	0	0	0	0	0	0	0	0	0	0	0	0	0	0	0	0
FBgn0012025	0	0	0	0	1	0	1	0	0	0	0	0	1	1	0	0	0	0	0	1	0	0	1
FBgn0012024	0	0	0	0	0	1	0	0	0	0	0	0	0	0	0	0	0	0	0	0	0	0	0
FBgn0037608	2571	1610	1602	1966	1145	1230	769	1196	734	325	634	469	545	478	624	662	466	677	684	579	471	535	574
FBgn0037609	702	560	515	551	371	529	451	455	317	270	535	454	354	355	482	476	469	568	443	390	402	444	419
FBgn0037610	759	560	423	391	479	657	453	768	359	203	875	669	569	621	1934	1730	772	1488	1861	2035	1410	2238	2616
FBgn0037611	160	112	93	146	103	106	80	72	59	34	77	38	70	53	70	71	67	69	60	62	73	68	53
FBgn0053325	0	0	0	0	0	0	1	0	1	0	1	3	1	1	1	5	0	0	2	1	2	0	0
FBgn0266242	0	2	0	0	0	0	0	0	0	0	0	0	0	0	3	4	4	3	3	8	4	4	6
FBgn0265158	0	0	0	0	0	0	0	0	0	0	0	2	2	3	24	15	4	10	15	26	14	36	29
FBgn0001180	0	8	6	3	8	6	1	0	1	2	1	2	1	3	4	2	3	0	4	4	1	5	2
FBgn0037613	356	292	244	276	189	301	215	316	139	95	334	257	215	212	598	492	274	414	493	496	349	617	541
FBgn0037612	235	179	400	234	116	124	134	221	147	57	57	80	76	87	753	154	84	124	2380	1982	508	1900	1657
FBgn0037614	913	680	545	618	475	729	469	541	352	260	308	453	436	408	456	551	346	566	361	311	217	462	518
FBgn0037615	4	4	6	4	1	8	9	11	2	3	1	3	1	6	1	1	3	2	1	4	1	2	3
FBgn0037616	124	172	118	94	229	623	363	671	237	208	921	718	671	732	2710	2602	1003	2067	2645	3007	1831	3780	4132
FBgn0037617	264	240	187	194	174	176	169	211	103	144	97	215	142	157	137	110	134	116	140	189	126	246	165
FBgn0037618	20	14	9	14	15	24	10	16	4	12	20	15	15	25	62	30	35	30	54	54	56	55	54
FBgn0037619	153	104	81	99	90	100	75	73	48	51	60	68	50	53	77	59	90	62	82	70	66	71	70
FBgn0037620	125	72	47	74	44	77	60	55	61	25	58	57	62	50	65	61	39	57	80	49	43	59	70
FBgn0037621	1438	1047	846	958	829	976	715	839	495	385	786	626	583	541	801	742	758	731	677	633	646	630	697
FBgn0037622	617	467	384	387	324	452	311	445	225	215	220	340	280	339	381	278	389	347	426	354	337	362	287
FBgn0037623	222	234	148	211	112	210	93	215	100	70	163	173	129	171	642	402	302	355	515	574	431	955	675
FBgn0037624	1873	1826	1207	1737	1368	1260	1013	973	844	817	1381	1416	1046	1030	3664	1439	3107	1846	3267	2254	2802	2300	1557
FBgn0083971	0	0	0	0	0	0	0	0	0	0	0	0	0	0	0	0	0	0	0	0	0	0	0
FBgn0037625	0	0	0	0	0	0	0	0	0	0	0	0	0	0	0	0	0	0	0	0	0	1	0
FBgn0265159	0	0	0	0	0	0	0	0	0	0	4	7	3	2	95	54	22	47	115	127	70	147	138
FBgn0037626	0	1	0	0	1	9	5	16	1	19	80	63	35	47	573	383	159	271	529	707	451	862	908
FBgn0037627	26	19	19	20	12	12	4	27	10	15	7	6	8	4	11	18	8	15	4	14	9	10	7
FBgn0085330	324	123	373	129	139	118	150	630	118	48	92	39	30	61	23	74	35	37	30	35	33	22	18
FBgn0261015	28	38	52	37	60	125	85	151	74	66	253	214	191	177	700	759	285	571	795	827	575	1113	1135
FBgn0046874	0	0	0	0	0	0	0	0	0	0	0	0	0	0	0	0	0	0	0	0	0	0	0
FBgn0053191	3	8	13	6	4	30	16	18	4	6	59	30	37	39	253	203	60	166	269	326	194	417	382
FBgn0053189	44	51	60	38	106	236	141	208	81	63	300	192	163	195	906	783	288	639	852	977	695	1097	1155
FBgn0037630	7	12	7	9	7	30	14	20	11	4	10	28	12	16	23	52	17	31	40	37	41	37	43
FBgn0037632	8690	6335	5444	5886	4278	5157	3580	4140	2967	1944	3001	3063	2978	2623	2780	2666	2506	2579	2111	1822	1670	2165	2596
FBgn0037633	289	252	224	218	131	162	102	117	93	64	69	92	85	80	91	50	149	62	101	60	101	65	68
FBgn0037634	170	118	106	99	74	60	52	49	45	57	69	75	59	77	121	98	83	88	130	120	120	163	141
FBgn0037635	3404	2491	3479	2638	2206	2959	2603	1916	1992	439	808	825	521	501	1599	711	459	753	2012	2040	1216	2525	1981
FBgn0286516	4211	4468	2819	3497	2064	3308	2255	3005	2478	1824	1323	2019	2035	2291	2256	2434	2799	2172	3103	2668	2440	2933	2410
FBgn0262604	0	0	1	2	0	4	4	9	2	0	16	6	3	10	36	9	2	6	6	25	8	14	22
FBgn0040532	472	1044	555	990	688	759	641	1196	718	818	1082	893	703	992	6398	3069	1469	2211	15171	18853	6580	18961	12750
FBgn0037637	3462	2600	2486	2605	2201	2561	1631	2267	1581	958	1834	1477	1184	1080	1324	1476	909	1216	1378	1447	1391	1277	1344
FBgn0037638	1347	1177	936	967	878	1251	905	1032	647	633	886	1060	883	884	1367	1331	1009	1406	1225	1273	972	1696	1623
FBgn0262614	1374	1742	1109	1413	870	1460	861	1055	737	939	572	1147	1121	1443	1898	1128	2174	1445	2005	1731	1423	2179	1523
FBgn0011966	0	0	0	0	0	0	0	0	0	0	0	0	0	0	0	0	0	0	0	0	0	0	0
FBgn0053551	0	0	0	0	0	0	0	0	0	0	0	0	0	0	0	0	0	0	0	0	0	0	0
FBgn0264790	1	0	0	0	0	0	0	0	0	0	0	0	0	0	0	1	0	0	1	0	0	0	0
FBgn0003015	0	0	2	0	0	0	0	1	0	1	0	0	1	0	1	1	0	0	3	0	0	1	3
FBgn0286867	0	0	0	0	0	0	0	0	0	0	0	0	0	0	0	0	0	0	0	0	0	0	0
FBgn0037643	8991	9273	8468	9255	7780	9417	6891	8392	7181	5195	5546	7095	6065	5877	5921	6741	5257	5914	6399	7342	6263	6404	6603
FBgn0037644	1904	1271	914	1279	987	1021	644	832	532	380	736	634	593	543	664	622	590	594	645	460	540	548	557
FBgn0286204	17	2	2	85	2	2	0	1	0	0	1	0	1	2	2	0	2	1	0	1	0	2	1
FBgn0037646	714	652	703	550	825	624	439	491	725	215	292	233	225	211	143	277	117	141	157	208	181	109	251
FBgn0037647	965	632	638	613	625	589	468	604	450	279	517	583	431	378	449	444	574	431	670	627	580	545	451
FBgn0027503	837	795	568	685	483	761	477	537	371	279	353	467	469	537	702	654	567	616	523	554	432	751	705
FBgn0260243	469	406	300	379	307	390	288	290	207	189	213	289	251	288	362	289	383	306	393	274	323	349	271
FBgn0037648	465	406	362	399	362	377	295	322	256	250	333	402	313	249	443	329	407	355	477	482	392	566	378
FBgn0051100	137	690	576	1423	445	524	61	1073	335	459	99	99	38	281	2337	822	846	866	3750	4000	1894	4570	3817
FBgn0037650	0	0	0	0	0	2	0	0	0	0	0	0	0	0	2	0	0	0	0	0	0	0	0
FBgn0037652	4064	2723	2682	2985	2508	2266	1782	1906	1647	860	1601	1321	1234	875	974	871	812	787	813	712	925	666	713
FBgn0026380	5523	3894	3370	3868	3422	3578	2772	3441	2245	1476	3734	2667	2266	2190	3651	3417	2689	2968	3599	3347	3255	3407	3546
FBgn0037653	1667	1142	919	1062	786	1183	861	1191	620	469	1036	873	838	800	1662	1568	911	1313	1594	1626	1268	1870	2038
FBgn0037654	162	129	104	89	107	333	220	310	123	76	246	318	263	293	862	867	302	648	867	839	540	1019	980
FBgn0037655	2918	2391	1842	2098	1570	2397	1838	2204	1325	994	1782	1814	1637	1655	2689	2460	1779	2334	2684	2532	1980	2649	2902
FBgn0040534	884	588	490	625	500	533	327	481	227	154	485	275	306	294	414	413	329	406	449	413	420	411	454
FBgn0037656	464	370	309	314	293	439	308	421	169	150	364	310	279	257	651	728	426	609	621	636	449	720	759
FBgn0264075	817	816	475	661	472	616	445	513	318	268	381	512	467	477	686	509	651	566	609	506	487	602	620
FBgn0002932	774	702	425	453	369	704	355	523	340	225	310	405	417	546	686	655	650	636	625	610	535	647	654
FBgn0063298	0	0	0	0	3	12	8	7	4	11	31	29	24	35	282	220	90	179	368	434	296	563	562
FBgn0037657	1068	983	732	894	774	892	649	768	475	394	651	728	659	583	831	738	795	846	820	712	698	817	890
FBgn0010222	723	679	389	466	399	580	392	480	366	243	382	314	316	299	475	467	358	345	1252	2154	650	2150	941
FBgn0014018	1740	1599	1456	1316	1566	1766	1921	2753	1830	1013	1217	1284	1143	882	1038	888	1251	884	1639	1534	1342	1274	1486
FBgn0028708	432	345	252	302	259	283	217	258	184	129	228	184	168	197	190	207	246	199	270	207	241	213	192
FBgn0037659	1513	1168	765	971	666	1162	783	870	571	459	444	756	769	771	802	679	771	672	809	516	583	698	650
FBgn0037660	852	642	466	632	451	573	399	519	281	203	468	406	439	398	776	710	534	603	752	662	645	745	833
FBgn0037661	167	165	129	157	134	115	91	110	84	62	136	97	75	84	110	115	82	111	124	135	128	154	139
FBgn0003165	1700	1618	990	1264	761	1163	700	856	676	635	358	645	818	980	797	524	1025	567	879	597	695	720	561
FBgn0037662	0	0	0	0	0	0	0	0	0	0	0	0	0	0	0	0	0	2	0	0	0	0	0
FBgn0266706	4	4	13	4	0	7	10	9	2	6	16	3	6	6	18	12	6	13	15	10	9	15	21
FBgn0000412	6202	5816	3938	4941	4012	5124	3144	4074	2458	1725	3357	3448	3184	3861	5664	5431	4560	4662	5427	4641	4356	5391	5508
FBgn0260935	903	645	441	603	359	603	391	423	341	266	310	380	360	333	458	398	420	445	436	320	256	478	421
FBgn0037664	743	263	173	3516	193	492	304	505	128	109	452	388	365	445	1107	1127	454	980	966	1085	734	1400	1471
FBgn0037665	3	5	0	7	1	0	2	1	0	1	3	0	3	11	43	2	42	0	90	22	35	37	0
FBgn0037666	4	1	0	0	0	2	0	1	0	0	0	0	0	0	0	1	1	0	0	0	0	0	0
FBgn0037667	540	407	322	411	225	350	276	312	169	111	204	207	194	195	321	245	228	256	272	202	223	211	245
FBgn0037668	12	0	6	1	5	7	2	9	5	5	33	16	5	13	94	70	24	60	125	136	100	135	165
FBgn0037669	516	430	314	390	324	366	266	341	197	130	351	289	256	238	444	420	291	359	527	483	394	406	482
FBgn0037670	358	334	233	316	267	247	206	209	153	175	218	240	220	226	230	192	316	197	269	198	301	131	181
FBgn0037671	12169	12741	10401	13412	8830	10586	5849	13864	8164	6678	5391	5860	4572	5825	4722	5547	5978	4890	4072	4238	3740	4055	4030
FBgn0037672	141	414	349	546	145	421	513	141	128	493	2998	2515	1032	834	6951	4430	10049	6906	5223	2566	4592	2375	2251
FBgn0010803	3094	2354	2125	2195	2023	2251	1813	1753	1492	1210	1940	1917	1684	1336	1801	1867	1492	1703	1629	1465	1475	1615	1767
FBgn0285911	1558	1116	945	1164	831	1222	799	956	656	466	710	867	710	695	844	804	787	864	803	651	678	752	791
FBgn0286030	32	35	42	33	42	18	25	31	23	19	18	36	18	16	18	13	13	11	15	9	16	12	7
FBgn0037676	6	91	87	48	29	32	1	13	25	10	5	1	22	28	8	0	23	0	21	26	33	13	17
FBgn0037675	0	0	4	0	1	4	6	4	1	2	13	5	9	9	42	52	22	30	95	94	66	146	80
FBgn0037677	0	0	13	1	0	0	0	0	0	0	2	0	0	0	0	0	1	1	1	0	0	0	0
FBgn0037678	140	24	2714	152	380	182	25	52	598	34	21	8	9	405	12	260	44	235	11	17	1226	61	9
FBgn0037679	457	356	266	336	264	336	233	341	194	135	254	271	242	237	332	354	268	322	383	296	240	379	384
FBgn0037680	263	279	195	285	175	273	219	235	143	188	261	279	222	220	244	228	349	174	294	214	261	190	140
FBgn0262993	24	45	25	52	19	13	8	13	6	7	2	3	3	9	28	9	10	7	15	8	6	17	6
FBgn0266410	3335	3516	2572	2536	2333	2568	1764	2630	1566	1687	1382	2285	1940	1917	2042	1831	2042	1664	2729	2585	2033	2610	1719
FBgn0086053	0	0	0	0	0	0	0	2	0	0	0	0	0	0	0	0	0	0	0	0	1	2	0
FBgn0086054	0	0	0	0	0	1	2	0	0	0	0	0	0	2	0	0	0	0	0	0	0	3	1
FBgn0263750	0	1	3	1	3	8	7	1	0	0	11	5	4	7	28	25	12	28	34	68	29	58	53
FBgn0037683	2547	2312	1877	2140	2533	1967	1514	2376	1213	921	1255	1582	1131	1011	1068	1326	1392	840	870	1859	1114	717	729
FBgn0037684	327	95	829	219	1068	875	177	743	1140	575	324	516	327	1053	2128	3162	1551	1337	3704	3594	2940	2470	2834
FBgn0000723	453	454	383	480	235	404	158	351	258	164	162	270	295	375	601	512	544	491	732	636	620	769	709
FBgn0267820	2	1	1	1	6	10	3	6	2	5	21	12	4	0	25	29	10	22	33	41	21	43	35
FBgn0037685	0	0	0	0	2	0	0	0	0	2	0	0	1	2	0	1	0	0	4	1	0	1	0
FBgn0083953	833	572	494	604	420	455	340	440	281	155	371	332	263	261	413	389	283	324	403	394	352	456	392
FBgn0037686	35372	25669	27531	30721	22031	24399	21255	19775	20479	10556	22216	16487	14590	11829	11035	10510	11417	9717	10554	8108	10507	6838	7924
FBgn0037687	1264	934	955	751	1039	923	682	923	768	419	781	590	519	485	363	425	377	395	418	425	406	420	308
FBgn0037688	615	515	454	522	517	599	541	632	380	317	757	657	508	449	957	977	895	902	955	816	896	889	925
FBgn0037689	0	0	0	0	0	0	0	0	0	0	0	0	0	0	0	0	0	0	0	0	0	0	0
FBgn0260237	0	0	0	0	0	0	0	0	0	0	0	0	0	0	0	0	0	0	0	0	0	0	0
FBgn0265201	330	179	161	157	140	226	187	250	74	35	206	167	118	137	299	326	126	260	287	264	215	269	336
FBgn0003889	202	558	386	168	909	2684	1702	2717	902	967	4740	3665	3226	3789	14112	13894	5263	10506	15201	17748	11845	22572	21778
FBgn0037690	6	54	43	35	13	35	1	2	10	11	9	0	5	17	14	1	53	1	34	9	18	10	8
FBgn0011740	1736	1423	1079	1162	970	1568	1016	1174	835	624	879	1243	1144	1158	1466	1500	1072	1334	1131	985	889	1249	1433
FBgn0261552	4317	5794	6995	6322	4774	6215	4507	5025	4203	3478	2786	4613	4647	3969	3761	3853	4180	4234	3727	3567	3092	4485	3586
FBgn0037696	664	532	463	683	581	543	429	472	424	312	463	375	293	255	155	181	247	177	260	195	233	155	157
FBgn0037697	521	1052	651	838	612	375	181	297	205	218	217	133	291	541	530	60	933	67	556	307	600	126	47
FBgn0037698	22	145	96	93	49	83	7	21	58	26	15	6	45	74	33	10	58	13	39	26	38	29	30
FBgn0266730	1	0	1	0	1	2	1	8	2	4	18	8	6	14	97	66	23	70	69	111	85	114	100
FBgn0043791	127	28	122	373	32	37	27	60	18	2	9	9	6	9	6	8	3	13	44	5	10	8	9
FBgn0014380	1488	816	1185	898	879	758	536	982	699	446	429	501	365	415	426	400	645	493	340	352	560	332	248
FBgn0037700	1475	1303	915	1175	1064	1166	899	1060	699	450	890	841	779	711	954	879	725	801	770	683	688	690	802
FBgn0267790	5528	4537	3178	3738	3043	4023	2712	3243	1805	1677	2895	3117	2787	3011	4259	3977	3179	3634	3957	3525	3223	3880	3984
FBgn0003205	1757	1736	1234	1307	1156	1261	914	1298	776	700	845	1123	977	1046	1321	1114	1516	1060	1684	1408	1454	1338	937
FBgn0014022	700	503	469	491	438	364	270	331	219	165	263	210	196	211	192	226	178	192	171	149	172	185	176
FBgn0014023	2943	1741	1729	2062	1555	1365	1076	1377	1238	438	828	625	635	519	472	511	400	497	427	354	401	332	381
FBgn0037702	2355	2076	1560	1666	1470	2221	1523	2028	1237	1020	1269	1757	1783	1691	2695	2562	1747	2260	2339	2298	1719	3215	3045
FBgn0037703	211	194	194	183	135	175	126	149	120	112	78	166	156	143	180	110	166	113	220	158	146	200	139
FBgn0262180	0	0	0	0	0	1	0	0	0	1	0	0	1	0	0	0	0	0	0	0	0	2	0
FBgn0000244	1137	1330	1101	1326	1092	1158	774	876	952	568	584	693	630	560	575	491	949	531	580	444	659	342	315
FBgn0037705	956	1061	597	709	459	809	493	685	431	442	279	569	579	713	628	514	758	563	745	722	586	875	563
FBgn0260722	394	438	289	312	342	323	341	359	250	271	391	488	383	353	565	393	515	416	547	608	513	532	297
FBgn0037707	1487	1253	903	1239	929	1016	768	839	630	393	853	631	653	625	1007	835	796	792	895	841	741	837	822
FBgn0037708	298	237	217	246	208	177	183	166	142	106	133	145	130	81	65	73	95	82	72	58	85	61	67
FBgn0037709	2887	2552	2632	2963	2775	3044	2639	2462	2511	1285	1688	1752	1780	1200	321	483	633	560	291	249	391	272	244
FBgn0024833	1723	1414	1375	1592	1087	1363	992	1276	812	777	985	1136	873	824	1143	1173	1416	1255	1217	982	1066	1019	976
FBgn0027950	745	631	413	533	398	487	364	520	230	187	424	335	287	350	551	483	452	443	472	387	412	401	456
FBgn0037710	2232	1554	1244	1455	1072	1580	1048	1426	857	460	1236	1014	965	979	2195	2107	993	1837	2249	2224	1568	2612	2643
FBgn0261049	358	299	216	267	177	266	165	243	124	99	173	182	175	130	224	185	184	214	194	197	142	175	279
FBgn0037712	66	52	37	49	21	58	34	38	26	21	35	35	42	41	47	84	57	50	91	96	57	81	78
FBgn0037713	291	181	193	179	162	182	147	235	130	80	131	122	93	80	67	80	76	44	60	63	68	55	47
FBgn0037714	3106	2462	2226	2060	3054	2609	1983	3362	2213	789	1600	1407	1221	1095	108	411	341	429	86	69	167	66	51
FBgn0037715	5118	4016	3679	3090	4511	3715	2516	3279	3280	1054	1701	1294	1326	1121	219	457	473	483	237	241	340	202	163
FBgn0027338	9587	8283	7139	7280	7048	7833	6052	6409	5121	3494	5757	5771	5439	4883	6278	6238	5198	5917	5856	5891	4877	7058	6923
FBgn0037716	754	563	392	457	354	605	375	522	257	237	474	407	415	468	973	845	448	736	763	701	531	906	1039
FBgn0037717	17	93	76	69	31	43	14	23	26	28	21	9	33	30	19	16	42	22	35	28	19	21	32
FBgn0053654	1	0	1	0	0	1	1	1	0	0	0	0	0	0	1	0	0	2	2	7	2	0	0
FBgn0037718	8711	8430	7260	7845	6075	8664	7912	6040	5840	5493	6514	6746	6110	5291	3105	3432	3771	4524	2194	1754	2269	2239	2603
FBgn0037719	817	771	623	687	576	656	510	675	438	341	496	546	418	410	576	619	515	595	540	500	380	630	615
FBgn0037720	884	725	544	607	562	732	490	829	412	287	376	406	414	470	665	656	447	551	592	590	491	757	725
FBgn0037721	89	261	141	284	125	119	19	281	157	91	26	42	23	72	129	56	135	47	49	95	108	34	30
FBgn0037722	435	296	201	280	292	264	172	296	146	90	180	160	166	150	213	213	153	162	204	138	161	193	189
FBgn0005585	77817	65068	69424	79330	51687	68031	67684	53642	44633	52294	78722	66656	55304	49707	37509	47322	48323	53435	29911	27216	37540	23998	29739
FBgn0286035	8	33	29	19	23	46	54	19	21	17	20	34	32	21	9	5	20	14	6	10	2	4	3
FBgn0037723	12588	9408	9194	8443	10390	7690	5736	4793	6415	2012	4379	3063	3347	2153	936	1528	1184	1417	1202	1338	1566	904	1026
FBgn0266413	1	2	1	2	0	1	2	2	3	1	10	5	10	1	51	31	8	17	60	72	62	96	69
FBgn0003334	1087	1008	714	832	715	1046	711	819	570	412	553	779	791	807	1277	1273	870	1160	1028	1040	753	1389	1385
FBgn0012344	267	375	248	255	296	444	301	383	135	217	355	401	405	402	585	615	481	542	583	568	450	531	603
FBgn0037724	87500	57866	70773	70156	55014	65088	47244	75048	46523	37536	41257	48961	33364	34480	15284	51486	37128	34917	18043	26345	25355	19145	24499
FBgn0037726	16	1	9	15	3	18	12	11	3	5	45	22	21	28	140	138	39	103	116	140	76	226	263
FBgn0263389	0	0	0	0	1	0	0	4	0	0	8	4	9	7	85	72	16	65	93	170	102	194	191
FBgn0037727	46	43	31	21	22	18	27	20	18	1	24	15	6	5	9	10	4	5	18	8	6	22	8
FBgn0037728	14057	11738	10131	10531	10241	9789	7495	8563	6407	4077	7452	7152	6749	5718	7431	7306	5804	6709	6920	6378	5813	7408	7618
FBgn0028997	359	272	230	197	223	501	314	482	174	143	548	433	421	430	1452	1395	508	1107	1389	1564	1087	1753	1923
FBgn0037730	156	197	202	149	283	429	493	512	233	713	951	1133	778	835	2541	1904	987	1652	5197	6311	3185	6400	5927
FBgn0069242	4197	3660	3793	4362	2805	3858	4190	3367	2633	2980	5404	3794	3290	2703	2921	3077	3679	3324	2256	1656	2263	1723	1866
FBgn0037731	0	0	0	0	0	0	0	0	0	0	0	0	0	0	0	0	0	0	0	0	0	0	0
FBgn0260463	0	0	0	0	0	0	0	0	0	0	0	0	0	0	0	0	0	0	0	0	0	0	0
FBgn0053105	0	0	0	0	0	0	0	0	0	0	0	0	0	0	0	0	0	0	0	0	0	0	0
FBgn0052939	0	0	0	0	0	0	0	0	0	0	0	0	0	0	0	0	0	0	0	0	0	0	0
FBgn0051352	1809	1446	1352	1275	918	1772	822	956	956	681	810	936	741	730	1267	1356	909	695	1082	771	757	974	605
FBgn0037734	1305	1119	815	857	742	1255	886	1137	682	399	771	991	831	931	1637	1567	884	1477	1448	1487	1039	1899	2038
FBgn0278604	390	464	281	355	301	487	332	411	225	204	280	443	386	392	713	670	507	590	648	615	538	694	667
FBgn0263477	0	0	0	1	0	0	0	0	1	2	0	0	4	4	0	0	0	0	1	1	1	1	2
FBgn0002431	13871	10394	7565	8117	7301	10443	6204	6268	5577	3699	3009	6163	6517	5735	5465	5706	4452	5775	4529	4532	3609	6839	6485
FBgn0262477	7	43	12	30	12	18	1	11	9	9	9	1	19	50	29	1	75	6	75	35	35	17	7
FBgn0003886	13	143	602	635	109	102	79	157	118	104	109	236	139	112	359	215	285	605	403	151	303	357	147
FBgn0037736	58	159	90	131	64	74	21	26	45	40	43	20	56	110	101	86	155	61	168	135	146	102	102
FBgn0037737	458	392	303	345	273	316	254	365	177	114	197	235	177	214	275	216	227	241	281	221	259	205	193
FBgn0085438	32	30	24	48	11	14	11	15	9	3	11	6	10	21	24	36	34	14	35	22	13	24	21
FBgn0051415	9	10	11	7	23	71	36	71	23	30	144	96	89	113	612	534	203	450	690	835	532	910	996
FBgn0037739	453	343	276	294	265	319	211	307	157	134	237	251	196	214	355	318	316	282	370	283	262	245	238
FBgn0005777	2677	2504	2295	2218	2091	2406	1830	2235	1534	1170	1605	1839	1658	1571	2267	2411	1462	2129	2101	2286	1726	2673	2642
FBgn0037741	262	329	225	253	186	217	193	177	151	152	151	213	211	152	119	126	218	148	140	68	114	96	85
FBgn0037742	1911	1176	754	956	653	1369	851	1306	431	282	1124	929	831	934	1877	2142	781	1705	1670	1832	1169	2044	2230
FBgn0037743	1525	1216	1374	1242	906	1202	1209	924	847	1031	1471	1300	951	940	799	1007	1052	1055	788	573	724	621	635
FBgn0286506	5953	4769	5485	3892	5617	5579	4544	4316	4761	1947	3432	2908	2628	2064	1706	2045	1558	2005	1815	1735	1869	1693	1826
FBgn0266720	800	742	606	744	548	467	362	531	424	314	377	400	355	344	409	333	423	383	510	413	427	367	322
FBgn0037746	1054	1001	641	634	828	1704	959	1556	615	430	1506	1429	1267	1577	3840	4089	1762	3095	3282	3253	2272	3978	4367
FBgn0024330	757	550	387	526	359	450	290	399	229	165	335	289	258	300	533	465	372	436	406	372	270	482	468
FBgn0037747	629	481	527	455	485	500	415	621	405	340	427	543	389	377	459	452	476	416	497	469	472	476	405
FBgn0037749	1330	996	853	748	1065	1034	872	1182	781	681	1291	1188	885	803	1033	1326	764	1053	1081	1087	1009	1117	1233
FBgn0037750	824	362	514	418	360	495	306	673	486	248	253	195	168	216	422	610	464	489	565	761	549	680	641
FBgn0037751	834	501	333	377	259	587	379	510	201	108	446	471	340	448	1035	1073	437	967	949	1104	698	1308	1478
FBgn0261599	57359	44365	46554	46115	36357	38379	33882	34397	31209	20693	36991	31659	26291	21915	23810	23634	23308	21545	21293	20288	22149	19735	20571
FBgn0086663	5	5	9	8	6	15	12	18	9	1	19	5	13	9	12	16	9	11	12	24	9	32	31
FBgn0051514	0	0	1	1	0	2	2	2	1	0	2	0	0	1	0	0	0	0	1	0	0	0	0
FBgn0037753	149	134	501	593	41	83	48	33	53	25	39	28	72	35	37	25	63	57	61	45	28	31	28
FBgn0002868	12850	9446	7367	10248	9170	10092	10364	15212	7089	4566	7891	7775	6009	5578	3877	5069	4576	2849	4361	10187	7074	5238	7564
FBgn0037754	9	127	86	87	29	67	4	5	36	14	21	3	40	56	48	5	104	2	66	33	49	31	9
FBgn0037755	514	490	431	538	341	473	362	383	326	317	295	485	397	376	422	378	456	384	409	400	380	382	311
FBgn0037756	4096	3690	3909	4113	2708	3599	3513	2817	2423	2591	3447	3389	2865	2667	1896	2183	1868	2527	2168	1867	1708	2150	2172
FBgn0037757	1047	915	687	895	557	847	584	624	464	436	474	578	574	591	692	585	668	652	632	467	481	619	606
FBgn0267819	2	4	2	7	1	2	0	0	1	1	0	2	0	0	0	1	3	0	0	4	1	0	1
FBgn0037758	1951	1796	1353	1702	1297	1551	1332	1276	973	1280	1864	2159	1509	1293	2183	1944	3096	2347	1452	1146	1467	1423	1341
FBgn0037759	114	138	131	75	224	631	411	684	195	206	903	715	607	731	2612	2399	957	1890	2311	2672	1789	3608	3772
FBgn0037760	2313	1853	1082	1338	1102	1943	1189	1444	751	642	877	1230	1155	1344	1815	1989	1445	1792	1615	1472	1119	2021	2070
FBgn0264827	2	4	4	2	2	2	0	0	0	0	3	2	1	1	0	1	0	0	4	0	0	2	10
FBgn0037761	0	64	38	36	8	121	4	4	14	1	36	0	1	2	16	14	3	7	9	5	36	4	5
FBgn0037762	0	3	33	28	0	0	0	0	0	0	2	0	0	1	3	1	2	0	0	0	5	1	2
FBgn0037763	85	100	127	134	63	214	137	199	79	41	208	186	157	205	477	504	179	430	424	471	289	488	572
FBgn0037764	3	14	41	36	3	20	3	2	0	1	8	4	0	1	6	8	1	7	5	4	12	5	4
FBgn0037765	78	72	119	147	34	63	8	18	11	7	39	9	15	6	28	32	13	23	15	8	9	25	10
FBgn0262104	1158	647	429	577	340	507	322	476	153	49	300	254	238	236	392	530	180	449	313	325	253	342	360
FBgn0267440	23	21	16	11	8	10	18	13	4	1	12	8	7	7	13	22	7	17	22	19	9	11	14
FBgn0085331	169	143	63	98	56	96	62	84	26	12	71	58	58	44	106	116	51	90	139	117	74	104	109
FBgn0262105	2	3	6	0	3	17	18	28	16	8	33	19	20	36	81	86	32	64	61	84	68	88	108
FBgn0037766	14	59	28	56	23	30	3	8	12	7	5	5	16	18	26	2	27	6	26	15	16	18	24
FBgn0267336	570	730	599	838	334	394	318	454	272	183	229	341	348	281	459	303	343	299	498	433	382	563	376
FBgn0266389	0	0	0	0	0	0	0	0	2	0	0	0	1	0	9	4	7	5	7	23	5	13	17
FBgn0037770	916	1011	649	700	632	701	493	511	468	364	373	497	458	541	534	320	738	326	618	434	585	356	300
FBgn0283554	0	0	0	0	0	0	0	0	0	0	0	0	0	0	0	0	0	0	0	0	0	0	0
FBgn0045473	0	0	0	0	0	0	1	0	0	1	0	0	0	0	0	1	0	0	0	0	0	0	0
FBgn0037772	4	5	7	1	3	4	7	12	4	1	9	13	7	4	18	22	4	17	10	18	8	17	27
FBgn0037773	322	258	195	220	184	282	210	256	136	73	185	172	161	137	391	284	191	260	266	245	212	279	303
FBgn0053208	2622	2247	1848	1825	1162	1960	1154	1498	1226	913	839	1194	1192	1358	3009	2148	1627	2005	3596	4360	2315	6874	4432
FBgn0051407	0	4	4	1	4	55	36	65	21	25	187	112	89	119	799	722	241	604	1102	1168	797	1371	1319
FBgn0027524	1310	945	720	848	779	931	671	837	517	332	832	671	581	613	882	899	555	809	754	802	718	734	862
FBgn0037777	1012	676	575	631	562	614	471	668	405	232	508	425	382	349	722	721	334	605	769	786	604	793	843
FBgn0037778	512	427	363	459	344	362	274	313	213	141	237	187	191	167	127	169	158	167	154	121	140	110	124
FBgn0037779	7893	6971	8190	7442	5511	6989	6459	5357	5035	3296	5232	4875	3881	3525	1882	2607	1938	2944	1518	1388	1563	1478	1583
FBgn0037780	1179	810	603	688	549	758	653	750	375	289	585	596	534	538	1135	1049	561	893	1029	1084	730	1212	1317
FBgn0037781	284	103	99	153	96	151	143	215	94	65	172	109	64	127	128	171	109	119	116	144	135	125	136
FBgn0265081	52	31	28	48	38	46	57	75	55	27	15	23	26	44	12	14	13	21	14	5	16	7	9
FBgn0051410	926	183	861	344	225	354	287	452	151	267	415	131	159	261	32	161	218	32	32	132	116	59	17
FBgn0037782	1615	237	1277	745	282	229	772	617	372	296	411	83	33	430	6	72	39	80	9	11	511	44	5
FBgn0037783	265	9	452	220	20	10	117	37	5	4	12	3	0	178	0	60	0	17	0	5	272	33	3
FBgn0266732	2	0	1	0	0	5	1	3	0	2	13	9	4	8	78	35	14	36	25	37	26	37	31
FBgn0053629	0	0	0	0	0	0	0	0	0	0	0	0	0	0	0	0	0	0	0	0	0	0	0
FBgn0053630	0	0	0	0	0	0	0	0	0	0	0	0	0	0	0	0	0	1	0	0	0	0	0
FBgn0053631	0	0	0	0	0	0	0	0	0	0	0	0	0	0	0	0	0	0	0	0	0	0	0
FBgn0053783	0	0	0	0	0	0	0	0	0	0	0	0	0	0	0	0	0	0	0	0	0	0	1
FBgn0053784	0	0	0	0	0	0	0	0	0	0	0	0	0	0	0	0	0	0	0	0	0	0	0
FBgn0041105	3	8	2	10	1	1	1	2	0	5	3	3	0	8	5	4	16	3	8	5	5	5	12
FBgn0037786	100	139	125	132	190	241	169	290	147	135	116	166	88	144	84	163	173	147	26	127	64	49	72
FBgn0266414	0	0	0	0	0	0	0	6	0	2	0	0	1	1	2	0	2	0	2	2	0	1	1
FBgn0262378	0	0	0	0	0	0	0	0	0	0	0	0	0	0	0	0	0	0	0	0	0	0	0
FBgn0263413	36	64	51	72	50	100	169	107	152	36	29	56	34	26	25	55	32	28	26	16	30	13	17
FBgn0262419	0	0	0	0	0	0	0	0	0	0	0	0	0	0	0	0	0	0	0	0	0	0	0
FBgn0262459	0	0	0	0	0	0	0	0	0	0	0	0	0	0	0	0	0	0	0	0	0	0	0
FBgn0028734	2515	2664	1766	2000	1645	2571	1671	2108	1240	1136	1499	2036	2099	2214	4434	4328	2645	3457	3970	4131	3062	5607	5499
FBgn0037788	1269	714	662	652	664	826	782	752	358	394	526	142	234	330	167	134	369	114	140	92	180	77	42
FBgn0266721	23	46	37	31	30	49	24	54	19	4	29	32	36	30	52	78	41	71	67	68	45	72	92
FBgn0051477	1486	845	489	723	383	748	401	629	230	87	513	314	314	333	507	672	257	625	533	548	331	573	522
FBgn0001321	97	185	211	338	75	121	24	173	104	97	25	51	20	81	92	53	168	34	132	66	109	48	17
FBgn0267705	2	1	1	2	7	26	17	26	4	4	37	38	37	30	93	91	26	70	74	83	56	108	111
FBgn0004889	3427	3337	2005	2448	1991	2643	1470	2677	1300	1364	1272	1622	1575	1811	2454	2302	2125	2083	2279	2310	1794	2790	2317
FBgn0037792	796	543	362	391	288	357	266	309	156	138	174	211	234	225	260	240	240	252	242	150	170	210	193
FBgn0261817	296	1238	358	249	140	283	81	24	83	43	112	42	61	13	2	4	1	1	0	0	0	0	3
FBgn0086359	405	504	1050	1158	263	469	229	303	222	139	200	232	259	347	402	397	342	314	335	330	242	322	405
FBgn0085332	0	0	0	0	0	0	0	0	0	0	0	0	0	0	0	0	0	0	0	0	0	0	0
FBgn0037794	308	234	188	200	148	181	128	144	97	76	111	135	90	114	141	87	159	110	190	131	155	122	106
FBgn0040238	1469	1376	955	1186	899	1464	910	1316	1049	627	567	707	680	683	375	399	547	494	368	469	351	397	354
FBgn0037796	381	475	303	267	312	300	44	341	250	242	69	104	88	225	164	91	351	80	182	78	189	75	11
FBgn0004575	43	615	339	372	205	250	11	45	162	72	49	12	138	212	98	17	349	39	189	121	165	92	59
FBgn0025879	81	71	123	199	34	39	31	35	54	39	19	35	56	69	57	65	56	27	65	94	71	61	62
FBgn0037797	1	2	1	0	0	3	0	2	0	1	2	0	5	2	4	3	1	2	5	5	2	4	2
FBgn0037798	80	86	44	33	84	189	94	176	56	44	194	104	150	187	303	459	153	376	359	401	298	447	467
FBgn0083943	169	190	127	90	152	406	294	484	125	113	547	392	323	443	1236	1407	504	1027	1296	1607	1135	1967	1712
FBgn0261928	54	226	153	160	141	344	160	199	128	114	160	292	330	401	974	1177	482	946	1070	1170	747	1724	1914
FBgn0037801	14298	12891	11803	9677	11322	14304	12196	7375	9768	6791	9855	7834	8750	6586	4131	2784	2651	4290	6072	8198	4233	6876	6763
FBgn0037802	71	99	52	79	54	55	54	54	23	39	37	44	41	33	51	43	34	36	57	40	47	51	31
FBgn0040078	3678	2593	2081	2242	2042	2787	1928	2267	1265	903	1932	1747	1606	1588	2718	2829	1608	2493	2504	2620	2072	2810	3145
FBgn0262617	744	794	827	919	540	957	573	873	543	436	569	770	713	826	1712	1674	956	1424	1364	1514	1034	2369	2475
FBgn0011970	0	0	0	0	0	0	0	0	0	0	0	0	0	0	0	0	0	0	0	0	0	1	0
FBgn0037807	538	499	571	400	483	598	196	814	422	233	155	216	146	261	53	105	226	124	40	52	79	39	24
FBgn0266717	8271	6041	4373	5351	3589	6255	3844	3761	3262	2641	1944	4037	3942	3802	4137	4000	3508	4207	3644	3717	2928	5741	5340
FBgn0037809	475	356	272	272	256	300	192	287	154	92	241	212	172	157	268	298	183	201	291	267	216	274	293
FBgn0037810	3915	3043	1728	2242	1796	3404	2039	2386	1144	1000	1445	2263	2433	2669	5692	5463	2699	4554	4307	4502	3098	6898	7220
FBgn0037811	84	120	60	71	81	208	136	194	62	70	172	161	192	179	378	574	246	450	423	492	321	615	724
FBgn0037812	59	70	48	63	47	143	84	160	33	31	154	119	112	122	279	305	145	277	444	342	218	401	430
FBgn0051406	14	47	45	15	75	219	149	255	66	78	413	299	255	304	1282	1345	463	991	1505	1739	1260	1982	1793
FBgn0015396	369	634	250	362	287	343	220	248	159	301	179	290	437	602	635	279	877	311	621	383	641	440	290
FBgn0020379	265	306	244	273	196	341	227	278	150	131	186	249	272	315	455	459	342	404	431	408	357	493	536
FBgn0266243	4	3	4	0	5	2	4	2	2	0	2	3	2	1	2	3	3	1	1	6	0	0	1
FBgn0259938	1139	1415	1117	909	1215	1410	1079	1402	1159	803	600	992	752	752	729	547	787	750	1027	1023	1051	951	704
FBgn0045443	2	6	3	3	0	8	5	3	1	6	4	3	2	3	10	13	1	15	17	13	4	19	11
FBgn0037814	1563	1090	730	873	746	1169	726	1051	494	389	704	887	744	766	1162	1311	734	1271	988	917	786	1233	1299
FBgn0262223	0	0	0	0	0	0	0	0	0	0	0	0	0	0	0	0	0	0	0	0	0	0	0
FBgn0262420	0	0	0	0	0	0	0	0	0	0	0	0	0	0	0	0	0	0	0	0	0	0	0
FBgn0024957	25587	20434	19740	16654	18391	15121	15681	14854	15224	5675	6585	7818	8696	6799	3158	4845	3805	4027	4552	5901	4691	6114	4956
FBgn0037815	737	472	414	456	367	336	306	326	204	116	268	196	188	138	129	94	144	143	124	129	157	84	90
FBgn0037816	567	396	333	394	289	343	226	260	221	114	219	159	141	123	162	189	128	169	176	150	112	151	187
FBgn0278600	0	0	0	0	0	0	0	0	0	0	0	0	0	0	0	0	0	0	0	1	0	0	0
FBgn0037817	766	752	870	733	935	1125	1073	984	728	684	1041	1165	944	895	1052	970	949	983	1954	1770	1565	1464	1323
FBgn0266244	0	0	1	0	1	3	7	16	4	1	16	11	8	7	45	58	20	35	44	47	39	89	82
FBgn0266260	0	1	0	0	0	0	0	0	0	0	5	5	1	3	32	46	16	37	56	67	53	105	100
FBgn0267136	0	0	0	0	1	5	5	3	0	1	5	4	10	14	41	46	14	33	30	63	25	91	78
FBgn0001235	1089	1481	1329	1130	1014	1079	785	979	739	792	273	977	943	932	502	311	807	341	875	644	850	694	332
FBgn0263547	0	0	0	0	0	0	0	0	0	0	1	0	0	0	0	0	0	0	2	0	0	0	0
FBgn0264788	2	17	8	1	2	10	0	2	0	4	5	1	4	7	7	1	7	0	14	4	6	5	2
FBgn0037818	805	950	958	1132	1172	1161	823	1227	676	447	650	838	604	569	359	670	406	552	375	522	589	421	636
FBgn0037819	883	1055	1693	1565	1415	1669	1060	1294	1224	1063	1990	1654	1684	1265	680	1430	874	1310	1326	1091	1339	882	1007
FBgn0265161	17	10	14	4	13	32	22	26	13	20	37	43	37	38	72	82	37	75	59	56	55	70	85
FBgn0262717	649	287	4240	5277	139	149	32	48	100	42	49	172	83	116	184	97	172	102	125	60	331	89	44
FBgn0020385	18093	14056	15900	12960	16074	16719	14799	12481	16195	8799	12063	11837	11314	9191	5681	7339	5739	7500	12233	14092	9547	13953	10458
FBgn0037822	2830	2078	1832	2100	1628	1680	1218	1488	1265	564	1001	849	834	794	684	670	744	760	723	595	651	549	688
FBgn0051391	7	18	16	10	14	37	55	61	12	29	146	128	100	134	1077	851	312	620	959	1174	775	1757	1714
FBgn0051467	90	66	66	56	40	89	70	73	25	28	71	76	72	88	353	330	151	276	385	488	309	688	592
FBgn0037824	0	0	0	0	4	2	1	8	2	0	22	10	9	14	104	87	33	89	165	148	119	219	213
FBgn0051278	273	218	207	254	145	231	148	170	116	89	122	149	107	119	101	147	110	84	87	90	104	111	111
FBgn0051373	1183	1113	644	356	1115	1039	858	1190	698	435	851	905	692	590	334	693	516	419	285	475	556	344	412
FBgn0037826	11	45	23	8	58	171	116	189	49	43	256	230	186	228	782	816	299	685	841	1070	687	1312	1357
FBgn0037827	0	2	0	0	3	11	7	10	0	7	37	29	21	33	254	136	64	142	231	313	211	363	338
FBgn0037828	19	47	28	16	69	199	138	213	56	57	373	203	160	220	1067	1020	375	713	1171	1374	941	1553	1472
FBgn0004841	2	34	25	34	13	37	16	30	20	9	29	29	19	46	88	67	36	56	101	115	77	124	114
FBgn0037829	19	18	12	9	15	72	56	112	26	35	218	160	117	132	721	654	243	467	716	804	532	903	869
FBgn0051272	4483	3035	2076	3251	2027	3255	1765	3010	2148	1139	1440	2147	1220	1312	926	2403	1893	1722	493	1993	1136	964	1166
FBgn0266371	4	2	3	0	3	2	6	6	1	2	35	8	5	16	75	53	25	23	80	81	48	69	78
FBgn0051390	724	562	406	442	383	439	351	462	226	228	384	354	310	266	452	455	400	410	544	422	428	406	431
FBgn0266372	4	2	1	2	2	4	1	9	0	0	5	4	3	6	32	15	10	16	36	41	32	28	37
FBgn0037831	337	438	282	313	218	381	271	315	166	136	143	256	270	328	412	340	319	333	331	330	280	356	344
FBgn0010421	662	515	357	443	448	510	384	494	302	231	449	408	348	397	582	561	456	491	598	513	489	558	563
FBgn0266446	694	715	1954	2432	359	889	206	586	675	230	107	506	125	210	535	240	429	201	44	63	833	94	21
FBgn0266451	0	0	0	0	0	0	0	0	0	0	0	0	0	0	0	0	0	0	0	0	0	0	0
FBgn0266448	66	101	461	418	48	109	20	113	91	43	6	54	35	22	43	11	45	18	0	15	175	15	1
FBgn0037832	4	5	3	3	4	8	0	3	1	0	4	2	0	2	5	2	1	1	3	6	5	1	2
FBgn0261356	14	7	6	6	2	8	6	8	5	4	4	2	4	2	2	8	2	1	5	3	4	0	3
FBgn0261380	2585	2021	1972	2181	1722	1629	1084	1425	1360	472	775	628	698	529	355	417	380	401	332	279	335	291	313
FBgn0260944	2470	1947	1863	1928	1669	1655	1370	1596	1228	633	1248	1089	983	852	1053	968	973	926	1039	959	981	879	900
FBgn0037834	3245	2729	1956	2258	2030	1881	1448	1448	1265	832	1255	1277	1365	1147	1200	854	1285	885	1011	803	957	855	885
FBgn0017577	859	802	640	638	522	498	492	397	244	312	418	488	487	422	402	280	634	310	401	199	361	202	165
FBgn0037835	84	150	97	148	62	90	20	100	50	49	18	13	54	60	64	22	98	10	98	64	57	37	30
FBgn0037836	8	20	18	7	5	8	6	2	6	2	7	5	6	3	11	9	3	7	11	7	6	8	7
FBgn0037837	7	12	7	12	14	50	34	30	14	10	60	41	51	53	202	239	56	144	209	246	196	279	276
FBgn0037838	171	88	125	332	57	97	43	75	35	17	49	50	47	67	96	89	61	95	93	79	65	88	89
FBgn0261053	44	183	116	281	100	113	56	79	86	93	30	70	75	153	186	82	216	61	205	69	164	104	54
FBgn0259740	1012	1506	837	1103	910	1019	890	1250	813	673	778	731	876	699	616	491	704	504	801	671	804	604	436
FBgn0037841	47	24	16	25	26	17	24	22	12	14	13	22	26	21	20	16	23	17	14	12	23	7	5
FBgn0037842	3588	2884	2676	2362	3471	3152	2664	2995	2618	1628	2938	2476	2279	1675	1116	1775	1243	1659	1018	1165	1545	1027	1181
FBgn0037843	2887	2221	1844	2062	1705	2205	1507	2040	1366	797	1668	1637	1605	1525	2530	2678	1748	2300	2196	2222	1938	2874	2973
FBgn0037844	140	178	93	147	111	96	45	55	44	50	75	39	72	123	115	43	184	49	140	88	119	52	51
FBgn0037845	61	34	52	38	45	46	40	60	61	25	20	30	18	38	19	27	24	35	27	18	19	6	12
FBgn0037846	1514	1244	1625	870	1130	1736	1506	1394	1249	1091	1294	1486	1097	1093	444	735	664	770	251	189	544	186	213
FBgn0267376	3906	3246	2417	2565	3275	2913	1956	3815	2094	1004	1958	1898	1340	1446	1260	1592	1506	1488	951	1037	1233	1005	973
FBgn0037848	388	359	243	308	253	283	221	328	173	157	213	333	265	295	307	301	396	312	369	321	323	389	259
FBgn0011768	8998	6394	7159	7523	7734	6755	5412	5551	6379	3853	5987	4827	4332	3451	3002	3377	3170	3278	2904	3097	3494	2610	3135
FBgn0037849	9	98	45	22	23	49	11	25	20	10	20	12	46	68	50	25	94	24	76	41	76	48	34
FBgn0022359	8789	6169	6341	3819	6912	6348	5009	3753	5547	2266	4411	2718	3065	2257	709	869	946	883	622	309	1221	413	372
FBgn0266705	40	17	18	11	17	18	20	12	9	10	26	18	7	12	10	17	31	33	23	12	30	15	17
FBgn0037850	102	65	48	43	59	74	72	88	41	56	98	78	48	48	114	74	108	98	131	92	101	110	67
FBgn0037852	1088	791	780	768	722	747	665	658	519	442	628	712	518	507	553	586	502	643	899	627	550	914	711
FBgn0037853	359	284	182	249	145	192	95	175	109	57	118	58	104	99	102	111	103	107	120	91	69	122	115
FBgn0037856	246	193	116	133	112	140	83	96	67	50	49	85	65	108	125	65	106	83	156	113	133	142	103
FBgn0042094	6122	5489	5904	4515	7800	6943	5092	5450	6219	2576	4424	3964	3387	2412	2198	2804	2050	2735	2263	2467	2794	2529	2627
FBgn0037855	1137	916	691	777	545	753	572	618	420	327	430	470	474	480	502	418	490	430	466	318	337	376	404
FBgn0267137	83	41	26	21	10	62	39	48	12	6	16	7	17	8	23	21	10	26	23	12	7	15	14
FBgn0267138	86	53	37	33	22	44	29	71	28	7	10	18	12	22	19	17	13	28	16	14	10	31	18
FBgn0037857	1	11	7	4	25	94	57	65	37	54	223	136	147	150	678	701	249	555	661	851	557	994	977
FBgn0267121	0	0	0	0	0	0	2	0	0	0	3	1	1	1	13	17	7	7	11	14	7	17	15
FBgn0083950	6	101	57	84	28	53	1	7	24	15	15	4	30	56	47	17	98	5	55	29	37	42	31
FBgn0267671	0	0	0	0	1	0	0	2	0	1	6	0	1	3	16	23	4	18	12	27	17	28	20
FBgn0266245	0	0	0	0	0	0	4	3	0	0	4	1	2	2	5	13	1	2	5	12	5	9	5
FBgn0263403	0	0	0	0	0	0	1	1	0	0	3	2	0	3	70	44	16	29	83	131	81	146	105
FBgn0267139	0	0	0	0	0	0	0	0	0	0	2	0	1	0	12	1	3	4	11	11	10	10	10
FBgn0037860	0	1	5	0	19	49	30	59	14	32	216	167	118	143	788	673	275	577	973	1174	759	1277	1128
FBgn0040256	227	123	127	168	89	68	49	120	35	37	42	74	82	47	57	32	21	35	51	75	37	80	35
FBgn0037862	0	2	9	0	32	96	97	166	35	94	415	302	266	368	2000	1778	680	1260	1771	2207	1357	3269	3232
FBgn0261291	0	0	0	0	0	0	1	2	0	0	0	0	0	0	0	1	0	0	0	0	0	0	0
FBgn0040251	13	39	31	32	18	16	4	8	10	7	7	14	12	20	33	16	62	6	74	28	51	38	13
FBgn0040257	61	35	64	91	13	14	5	13	6	3	0	3	2	5	3	6	9	5	2	2	6	1	2
FBgn0040259	1106	602	1631	753	439	485	407	814	862	281	249	183	200	478	133	168	225	213	263	173	224	157	144
FBgn0027584	0	0	4	1	3	7	7	10	5	24	8	25	11	7	79	188	120	57	760	56	167	54	50
FBgn0040253	38	16	206	51	25	31	19	13	43	8	17	8	18	19	1	2	2	7	0	0	6	1	1
FBgn0040255	91	33	72	116	11	32	12	16	13	6	8	7	1	5	0	0	6	2	2	0	1	0	0
FBgn0026314	267	437	453	601	490	1107	518	1207	640	359	673	625	424	399	56	354	195	268	11	22	76	18	13
FBgn0026315	2817	1972	3778	3443	1866	2578	2310	2425	1923	2192	2015	2389	2097	2287	495	1636	1367	1686	393	185	738	219	258
FBgn0040250	120	27	217	25	63	92	21	117	99	67	19	17	4	75	14	78	104	88	10	49	27	18	31
FBgn0040252	208	43	493	48	131	135	27	247	134	128	5	20	6	134	8	115	122	90	2	10	39	4	5
FBgn0037870	128	45	65	39	47	20	48	30	11	23	51	4	11	19	1	5	13	5	2	2	4	12	1
FBgn0261808	1511	1510	1368	1424	1444	1097	835	1068	791	930	1060	922	721	821	423	464	800	608	722	570	851	476	391
FBgn0037873	7968	5100	4999	5514	5144	4726	3229	5077	3934	2001	3383	2228	2024	2078	1305	1504	1595	1511	1078	938	1182	946	1057
FBgn0037874	31465	28103	28626	27680	27882	26428	20862	23030	21876	14721	20736	20303	19198	15100	10918	11712	13847	12498	11938	11692	13085	11070	9986
FBgn0037875	2591	2385	2591	2453	2027	2876	2503	2316	1752	2263	2448	2993	2554	2185	1098	1456	1598	1725	1124	1257	1300	1179	1169
FBgn0086472	62859	43309	48069	50049	39515	43638	37131	35328	34399	19375	37362	31850	26599	21995	21514	21666	22534	19783	22896	19489	22012	15741	17757
FBgn0037876	431	298	174	263	161	262	210	288	110	69	214	166	147	165	272	344	139	249	228	226	156	261	328
FBgn0037877	496	353	284	388	230	256	203	265	157	114	186	163	146	145	185	150	192	170	151	127	133	147	145
FBgn0037878	1063	826	491	656	537	816	496	699	353	241	836	653	576	657	1285	1272	945	1178	1324	1162	1074	1341	1359
FBgn0020910	98160	78076	77526	85880	69000	72707	57139	52792	61148	32922	60193	49472	48523	37454	29571	29035	37560	32406	32106	24714	30671	23295	25809
FBgn0086055	3	5	13	4	1	0	3	5	4	2	1	0	6	1	0	1	2	0	1	0	1	0	0
FBgn0051144	0	7	4	2	6	20	15	34	5	7	46	45	28	36	209	181	72	125	141	185	136	198	245
FBgn0086056	0	0	0	0	0	0	0	0	0	0	0	0	0	0	0	0	0	0	0	0	0	0	0
FBgn0065064	33	43	38	36	15	50	63	63	33	16	26	28	21	11	14	4	20	21	12	1	10	4	2
FBgn0086057	3	17	19	4	4	17	22	8	10	2	14	12	7	6	1	0	3	1	2	0	4	1	0
FBgn0037879	74	97	88	173	51	70	115	28	34	78	145	71	96	39	27	17	22	10	7	16	19	10	4
FBgn0037880	1091	698	766	846	554	634	469	619	432	220	451	394	308	285	353	441	231	369	279	308	257	332	435
FBgn0037881	2053	1418	1070	1345	921	1147	869	971	718	450	851	815	679	639	886	882	869	926	819	626	658	691	775
FBgn0037882	295	224	157	195	149	155	116	134	104	75	165	117	96	100	117	118	119	99	140	106	138	97	89
FBgn0037883	597	429	364	315	325	276	222	238	217	110	249	166	146	121	104	95	113	114	102	73	142	79	71
FBgn0037884	713	710	449	488	467	760	536	753	386	364	546	712	609	640	926	1092	718	975	1119	1121	844	1201	1122
FBgn0037885	588	429	370	403	290	389	393	362	214	198	409	386	291	252	396	488	289	402	362	355	316	354	398
FBgn0051441	205	160	106	143	105	155	96	148	81	70	86	115	60	77	104	137	96	106	114	120	121	120	117
FBgn0051388	149	98	75	102	80	75	72	74	69	33	49	55	42	47	59	54	108	44	73	36	60	54	50
FBgn0037888	8	5	5	3	5	10	20	13	5	7	4	12	20	9	5	15	8	12	1	1	8	1	1
FBgn0037889	2	4	3	1	2	6	4	1	1	3	6	5	3	2	3	10	9	5	3	2	6	2	3
FBgn0037890	6182	5541	4981	3441	5686	5645	4330	5336	5189	2119	3535	2640	2263	2014	943	1604	1444	1521	826	865	1135	679	790
FBgn0037891	14122	12130	10776	12000	9258	11313	7820	9855	8941	4421	6221	5555	5500	5026	3639	4119	3170	4003	3253	3143	3252	3179	3487
FBgn0262972	69	12518	4173	8324	3796	1670	114	265	362	1595	733	100	2482	4903	2783	248	6415	381	2040	1366	2588	1076	452
FBgn0051386	0	76	32	72	33	15	2	0	2	13	11	0	25	22	20	0	44	2	10	9	12	4	3
FBgn0284418	0	0	0	0	0	0	0	0	0	0	0	0	0	0	1	2	1	1	4	2	2	5	4
FBgn0266415	0	0	0	0	0	0	0	0	0	0	0	1	0	1	12	12	6	4	24	35	11	28	31
FBgn0004595	18	620	149	252	152	121	14	51	38	254	89	31	286	980	1237	65	2239	142	1776	1039	1305	652	284
FBgn0267672	0	1	0	0	0	0	0	0	0	1	0	0	0	0	6	0	0	0	0	2	1	3	2
FBgn0026064	0	0	0	0	0	0	0	0	0	0	0	0	0	0	0	0	0	0	0	0	0	0	0
FBgn0026063	0	0	0	0	0	0	0	0	0	0	0	0	0	0	0	0	0	0	0	0	0	0	0
FBgn0267673	0	0	0	0	0	1	1	0	1	0	4	7	8	0	10	16	7	14	25	22	24	31	37
FBgn0267674	0	0	0	0	1	0	0	2	0	0	14	1	4	0	36	29	16	15	32	64	32	73	66
FBgn0037892	1883	1241	1168	1294	1152	1013	800	952	858	331	666	463	489	423	451	511	316	389	471	356	360	328	411
FBgn0264694	2959	2192	1871	2240	1599	1669	1252	1529	1074	624	1296	1125	1069	1006	1131	1168	867	1106	1177	1055	925	1066	1104
FBgn0011774	640	395	290	369	274	304	274	289	194	154	242	251	219	205	235	229	202	202	294	277	221	242	281
FBgn0263480	0	0	0	1	0	0	1	0	0	0	0	0	0	2	0	0	0	0	0	0	0	0	0
FBgn0037894	4303	3416	2904	2910	2122	3004	2082	2036	1563	1247	1784	1831	1887	1787	3066	2995	1843	2496	2809	2892	2052	3878	4179
FBgn0037895	39	170	154	182	69	84	3	11	40	17	25	0	36	36	19	4	41	0	24	16	21	8	7
FBgn0267236	1	3	1	4	0	0	0	1	1	0	0	0	1	0	0	0	4	0	0	0	0	0	0
FBgn0037896	18	11	8	13	3	10	10	7	0	18	25	14	12	8	26	24	16	17	27	37	25	36	39
FBgn0037897	1140	969	797	823	763	1203	855	933	806	826	786	1353	1127	1063	1230	1216	1024	1368	1723	1659	1388	2312	2063
FBgn0037898	188	106	120	126	94	115	73	90	48	33	70	47	56	34	44	48	45	49	55	42	36	26	48
FBgn0037899	5784	3585	3063	3398	2468	2313	1892	2104	1675	889	1853	1399	1388	1070	1590	1447	1323	1356	1724	1500	1494	1295	1424
FBgn0037900	869	678	638	796	444	785	651	764	409	430	1141	915	634	725	1759	1799	1661	1746	1462	1370	1292	1632	1674
FBgn0037901	1169	780	743	792	570	748	553	629	427	398	740	745	578	531	794	797	622	825	1006	988	695	1153	1154
FBgn0037902	630	381	255	411	178	314	169	287	124	48	191	173	173	206	390	425	194	363	285	318	187	331	435
FBgn0051374	135	165	400	417	88	157	41	92	113	47	29	58	34	79	142	33	91	52	42	70	176	35	19
FBgn0046225	209	191	126	154	153	403	259	381	138	99	505	405	371	472	1754	1462	680	1217	1588	1905	1247	2564	2554
FBgn0263520	0	0	0	0	1	0	0	0	0	0	0	0	0	0	0	0	0	0	0	0	0	0	0
FBgn0037906	1506	535	1186	709	584	283	370	500	200	264	528	312	278	194	330	325	508	351	300	241	314	323	302
FBgn0267141	5	0	1	0	1	1	0	2	0	1	6	4	1	0	22	25	9	8	15	28	10	42	38
FBgn0037908	20	43	45	27	32	18	2	6	21	2	9	3	14	15	14	3	30	6	19	13	19	12	7
FBgn0053512	9	71	69	90	32	58	3	10	37	11	9	1	22	42	27	3	40	4	34	25	18	15	11
FBgn0266416	3	4	1	0	3	13	7	9	1	8	25	26	23	25	149	105	38	95	154	232	145	205	224
FBgn0037910	314	295	194	190	216	583	345	521	158	99	536	383	372	444	1011	1092	441	913	1009	960	703	1147	1112
FBgn0037911	592	368	384	444	266	424	218	369	201	129	258	255	220	224	338	392	227	308	299	301	257	277	312
FBgn0037913	8035	5585	6880	3030	8063	6683	6814	7678	5473	5709	11706	9863	7239	6863	4316	5584	5521	4933	3474	4085	6692	3364	2764
FBgn0037912	0	3	2	0	1	10	7	5	2	0	6	2	5	1	13	14	2	15	24	18	12	27	29
FBgn0263316	3011	2558	2370	2142	2053	2554	1837	2055	1963	1364	1109	1723	1489	1302	542	712	851	779	515	637	643	542	635
FBgn0037915	475	458	310	247	321	1035	614	902	327	253	911	909	840	965	3387	3231	1236	2537	3102	3304	2125	4466	4693
FBgn0037916	203	176	115	109	111	319	185	331	91	74	253	271	252	237	525	657	258	539	497	512	382	699	754
FBgn0037917	697	475	425	584	421	483	315	508	257	228	332	361	353	363	415	387	467	402	448	355	347	350	341
FBgn0037918	1567	1185	702	975	506	974	576	781	470	324	430	666	611	706	989	746	822	733	886	602	591	756	788
FBgn0051363	1474	1478	817	1071	1001	1520	972	1475	625	707	1791	1545	1562	1956	6986	5332	3151	4143	7557	7630	4985	10988	9253
FBgn0037920	521	322	208	333	266	300	176	252	121	63	209	153	130	150	241	208	154	196	184	145	138	164	190
FBgn0037921	175	130	75	75	56	103	68	90	43	18	83	49	55	70	96	120	84	106	150	119	111	140	129
FBgn0037922	677	520	428	409	387	598	389	517	281	189	402	309	291	347	557	595	374	507	506	466	385	505	610
FBgn0037923	119	122	72	79	55	85	59	79	41	32	46	50	60	50	74	77	50	91	52	60	44	70	88
FBgn0042205	113	68	77	99	53	86	66	73	38	50	56	44	46	35	70	71	60	77	79	59	39	61	68
FBgn0037924	1247	1119	721	827	713	1369	856	1168	615	468	1202	1178	1184	1159	3104	3068	1344	2459	2471	2771	1716	4540	4543
FBgn0262081	2086	1828	1426	1532	1129	1725	1187	1465	922	810	1117	1269	1157	1191	1910	1722	1439	1650	1709	1553	1214	1818	1949
FBgn0264986	5	2	2	0	2	5	0	3	3	0	3	1	2	5	5	6	2	2	4	3	2	8	1
FBgn0037926	2778	1921	1478	1619	1173	1429	1021	997	782	549	708	786	820	651	554	555	545	554	532	460	461	431	492
FBgn0259227	606	514	467	523	328	526	338	519	340	338	250	412	358	338	412	311	543	349	457	392	401	437	358
FBgn0037930	7074	5105	5600	5565	4081	4452	4600	3666	3778	2660	4247	3349	2947	2509	1788	2243	1651	2162	1632	1689	1683	1425	1563
FBgn0037931	327	272	196	194	191	298	235	268	108	90	214	172	180	203	283	287	235	295	270	259	214	348	364
FBgn0011290	652	651	496	607	505	431	397	444	307	241	408	416	335	322	380	281	385	273	423	288	343	268	280
FBgn0037933	805	577	450	486	481	657	514	730	359	275	716	528	512	505	1503	1320	651	1122	1869	1789	1180	1914	1714
FBgn0037934	934	237	1498	322	656	534	373	767	587	515	127	69	87	986	15	336	495	186	80	47	141	24	11
FBgn0037935	1397	1424	1677	1486	1273	1657	1605	1366	1051	1353	1398	1364	1591	1349	271	363	449	549	462	381	280	391	279
FBgn0037936	428	220	355	376	488	296	341	470	241	372	543	543	398	359	164	275	247	400	817	543	534	541	476
FBgn0042110	95	34	83	13	24	12	14	18	16	6	14	5	7	4	3	6	6	8	5	4	8	4	3
FBgn0037937	3	11	2	7	0	1	0	1	6	0	3	0	2	1	2	1	5	2	4	1	2	0	3
FBgn0265271	0	1	3	1	7	20	18	29	18	14	73	32	50	66	348	323	131	274	427	541	316	642	567
FBgn0037939	66	193	150	51	289	795	495	745	274	229	1219	1070	917	1036	5113	4380	1559	3327	4636	5453	3318	7210	7420
FBgn0267675	2	0	0	0	0	0	0	0	0	0	0	0	0	1	2	1	0	1	3	7	4	2	6
FBgn0025821	38	62	46	21	61	181	114	240	42	56	274	221	206	240	989	902	375	705	1056	1156	796	1433	1372
FBgn0037940	42	2	0	225	16	1	0	25	0	21	3	0	0	7	3	3	21	2	0	0	0	0	0
FBgn0037941	22	137	83	111	61	142	49	73	50	43	45	48	72	109	128	109	112	114	131	125	87	138	130
FBgn0037942	1406	908	1007	663	1146	1142	1006	971	931	462	1053	1010	792	730	1180	1316	689	1113	1167	1329	1054	1423	1558
FBgn0002906	568	489	345	371	371	692	370	524	225	190	371	516	451	532	1109	1287	580	1094	927	1033	633	1595	1711
FBgn0037943	1932	1534	1197	1318	1246	1464	1043	1236	777	493	1000	1090	1044	903	1256	1309	829	1228	1084	1089	929	1196	1221
FBgn0037944	1757	1368	910	1052	785	1402	1001	1298	615	513	705	968	900	1077	1805	1715	1116	1513	1158	1345	907	2292	2255
FBgn0262364	0	3	1	1	0	1	4	5	1	4	7	11	4	7	64	48	21	46	63	106	55	74	95
FBgn0017581	9918	8450	6148	6877	5704	7739	4870	6482	4551	3540	3301	5445	5067	5395	5986	6375	5800	6287	6985	6565	5023	7970	7227
FBgn0265276	150	1495	628	694	416	533	71	125	212	314	163	119	421	1063	1264	125	2178	148	1832	743	1425	410	135
FBgn0267155	0	0	0	0	0	0	0	0	0	0	0	0	0	0	0	0	0	0	1	0	0	1	0
FBgn0037949	960	848	640	578	497	943	604	660	444	282	409	599	579	656	1206	894	607	870	837	814	632	1140	1137
FBgn0037950	21	11	17	11	14	23	11	17	7	9	15	6	15	4	60	34	19	21	61	107	32	145	76
FBgn0025802	1570	1239	797	943	773	1512	856	1150	627	431	496	1005	931	932	1204	1422	888	1256	1097	1086	768	1712	1662
FBgn0051116	1788	1738	2132	2469	1358	1878	1337	1531	1377	910	824	1283	894	929	798	873	954	1025	1109	1313	1069	1288	1175
FBgn0259139	4541	4315	3285	3852	2858	3458	2496	2617	1820	1697	2149	2221	2097	2303	2883	2066	2904	2126	3096	2210	2533	2103	1939
FBgn0019624	26474	19006	18686	19976	19767	17983	13384	17912	15757	7185	12906	8929	8746	7435	4136	5647	5152	5187	3460	3417	4418	3038	3366
FBgn0037955	5776	4449	4474	4542	4674	4536	3631	4242	3608	1617	3213	2602	2345	2105	1031	1420	1250	1534	1039	967	1137	963	1002
FBgn0037956	108	202	127	145	97	157	71	114	126	94	79	149	119	186	189	99	262	105	257	109	208	135	79
FBgn0003312	9	199	11	123	71	77	4	24	9	155	78	10	8	291	315	147	667	37	401	261	415	51	28
FBgn0037958	769	576	443	501	410	504	366	413	318	202	309	294	340	343	407	384	293	336	407	362	280	384	409
FBgn0051368	1343	1268	791	1094	772	981	716	652	555	421	516	621	610	595	625	510	751	524	533	395	459	467	479
FBgn0037960	214	218	237	128	170	255	230	182	172	130	149	189	124	185	175	112	212	116	159	103	132	101	83
FBgn0037962	7	6	16	1	22	87	54	97	36	37	218	154	122	162	839	688	236	543	857	1025	727	1148	1129
FBgn0037963	404	544	361	515	262	499	325	304	285	304	197	375	417	418	385	276	558	329	340	164	315	266	206
FBgn0085336	0	0	0	0	1	8	1	3	1	0	12	5	9	8	37	29	11	23	43	54	24	50	24
FBgn0037964	6	13	12	1	31	82	48	81	32	48	113	93	85	79	317	381	156	258	331	353	232	494	443
FBgn0051211	1995	1866	1212	1509	1019	1731	1475	1796	979	692	1094	1126	1118	1338	1942	1698	1371	1569	1572	1456	1264	1713	1794
FBgn0013275	31	34	51	53	5	104	5	3	70	1	4	2	1	50	4	39	29	4	6	5	3	1	71
FBgn0013276	96	67	188	161	9	268	18	12	213	4	16	12	5	165	11	102	120	14	35	20	14	9	191
FBgn0260741	583	375	268	362	231	434	277	352	227	137	303	332	263	259	401	468	272	417	370	343	294	332	395
FBgn0000147	328	305	214	242	235	467	277	474	154	132	478	443	359	489	1264	1152	475	899	970	957	688	1355	1436
FBgn0260742	1925	1603	1414	1458	1048	1447	1061	1229	885	778	1078	1176	1048	1125	1434	1388	925	1367	1524	1355	1196	1559	1507
FBgn0260743	1012	909	1334	824	922	1011	499	1024	851	674	598	686	501	566	815	563	697	560	2028	2034	1024	2205	1396
FBgn0260744	1571	1348	1501	1258	1078	1693	1662	1433	812	1871	2957	3448	1900	2110	4806	4550	3161	4386	5686	5898	4298	5673	5476
FBgn0037970	3	15	8	7	24	94	69	100	24	47	169	115	106	112	567	598	222	433	702	736	588	893	868
FBgn0037972	36	72	13	89	32	42	9	62	37	41	39	40	19	34	89	32	80	25	98	68	88	75	19
FBgn0264984	30	12	6	25	8	7	20	21	5	8	17	7	11	6	3	18	11	16	22	24	8	17	13
FBgn0037973	6015	2203	1679	1539	2162	1340	2226	1960	1393	1166	2649	1845	1330	1046	868	1307	1003	1288	1605	1810	2184	1258	1387
FBgn0037974	186	74	68	36	67	28	100	94	48	181	492	377	215	223	2046	1094	681	956	4663	7356	4357	8206	5162
FBgn0037975	17	23	9	1	4	0	5	0	1	0	144	9	0	0	481	36	0	0	0	2	1	1	0
FBgn0260745	4315	4830	2988	14848	2513	4111	2403	4124	4175	2257	2384	2885	2662	2497	1831	1989	1909	1954	3543	3439	2637	3633	2975
FBgn0037976	107	57	136	40	99	137	7	226	163	94	8	0	7	95	18	29	104	26	12	20	27	3	3
FBgn0260746	3303	3422	3767	3969	2372	3445	2979	2300	2222	2155	2788	2905	2340	2060	1272	1565	1463	2089	1737	1424	1376	1820	1505
FBgn0037978	1072	773	676	698	708	954	820	910	527	798	1362	1387	993	1056	1279	1218	816	1356	1537	1432	1063	1329	1419
FBgn0037979	1028	961	750	837	681	1102	743	868	577	464	569	887	797	774	1058	1056	824	1089	986	995	726	1046	1243
FBgn0037980	246	196	166	151	173	266	217	251	159	121	303	286	243	273	758	726	376	623	841	856	596	1040	1044
FBgn0037981	194	142	112	150	129	140	111	151	96	57	141	130	99	84	173	162	133	167	200	156	154	165	147
FBgn0051358	1	1	1	0	0	0	1	0	0	0	0	0	0	1	1	5	0	2	6	2	1	2	1
FBgn0260230	0	0	0	0	0	0	0	0	0	0	0	0	0	0	0	0	0	0	0	0	0	0	0
FBgn0260231	0	0	0	0	0	0	0	0	0	0	0	0	0	0	0	0	0	0	0	0	0	0	0
FBgn0037985	20	116	100	19	205	628	422	664	207	240	970	863	815	826	4000	3539	1209	2478	3697	4274	2653	5425	5607
FBgn0037986	2	3	3	1	4	36	30	35	14	29	115	74	81	95	535	423	164	348	554	667	445	827	829
FBgn0037987	30	60	45	20	87	269	176	265	101	79	373	262	242	299	1010	976	360	867	1229	1316	1036	1439	1560
FBgn0037988	77	132	75	32	187	527	302	529	187	160	726	520	498	643	1915	2051	759	1611	2312	2515	1771	3037	2936
FBgn0037989	1136	1204	680	1011	574	947	827	918	492	681	306	497	913	670	269	263	461	408	275	185	312	319	246
FBgn0051361	239	582	318	439	335	884	767	971	399	421	923	861	1131	1056	2832	2937	1104	2281	2444	2943	2008	4075	4026
FBgn0037992	673	30	251	4478	9	20	13	20	5	7	20	9	17	18	47	59	23	40	39	67	22	62	67
FBgn0011905	0	0	0	0	0	0	0	0	0	0	0	0	0	0	0	0	0	0	0	0	0	0	0
FBgn0037993	6	38	20	28	13	29	2	9	17	5	5	3	5	21	20	10	30	3	23	13	4	14	5
FBgn0261714	1	2	0	0	1	2	0	3	0	0	0	3	0	1	9	3	4	9	7	4	1	5	4
FBgn0037994	1	4	17	2	36	130	87	165	61	74	415	301	247	295	1715	1636	577	1211	1722	1907	1296	2749	2777
FBgn0263404	0	2	0	0	0	1	3	3	0	0	9	2	9	10	78	43	17	37	86	107	62	103	124
FBgn0037995	11	26	26	9	47	144	119	143	40	57	276	219	185	227	1049	949	338	752	1055	1207	801	1472	1442
FBgn0051356	0	0	0	0	0	0	0	0	0	0	0	0	0	0	0	0	0	0	0	0	0	0	0
FBgn0037996	21661	5024	3051	9631	7887	13601	9477	6512	969	2540	5626	747	1693	2672	99	414	1793	68	103	265	116	547	59
FBgn0037998	1373	1117	1015	1087	898	1180	996	1054	693	679	1075	1165	923	804	1344	1360	1306	1250	1093	1044	957	1174	1246
FBgn0037997	0	0	0	0	0	0	0	0	0	0	0	0	0	0	0	0	0	0	0	0	0	0	1
FBgn0037999	640	618	707	741	747	904	683	655	711	353	617	603	589	348	311	314	287	327	452	619	404	555	410
FBgn0267676	0	0	2	0	0	0	0	0	0	0	1	1	0	3	7	3	3	6	10	14	10	20	15
FBgn0038000	82	150	74	51	156	466	314	422	131	118	628	464	409	455	1574	1654	620	1384	1764	1987	1362	2237	2415
FBgn0038001	1	10	15	15	0	5	3	3	1	0	2	3	1	6	3	7	2	5	1	2	3	7	6
FBgn0038002	14	2	104	9	0	1	0	2	0	1	1	1	1	0	2	2	3	3	7	7	3	7	5
FBgn0263454	0	0	0	0	0	5	3	3	1	4	27	22	8	14	82	77	41	61	115	145	99	139	162
FBgn0038003	2	1	0	0	0	0	0	0	2	0	0	0	1	0	8	10	1	4	33	55	19	60	49
FBgn0011270	0	11	13	0	47	139	98	163	30	64	405	225	219	251	1442	1249	461	924	1470	1662	1194	1996	2080
FBgn0038005	6	2	1	8	1	1	0	3	1	0	3	10	0	2	3	1	0	1	1	3	3	1	1
FBgn0038006	0	2	1	3	0	1	0	1	1	2	0	1	0	0	3	1	0	0	0	0	0	1	0
FBgn0038007	1	1	1	2	2	7	5	4	2	1	1	2	1	1	3	3	1	1	4	1	3	7	1
FBgn0264828	0	2	2	1	3	6	0	4	0	1	4	10	12	3	39	24	13	11	30	41	36	46	48
FBgn0267142	2	0	0	0	0	1	0	0	1	0	1	0	1	0	3	0	0	0	2	6	1	4	1
FBgn0038008	0	4	2	0	14	59	26	63	15	28	143	112	111	107	677	649	226	479	837	933	666	1204	1166
FBgn0267922	0	0	0	0	0	0	0	0	1	1	1	0	0	1	2	2	0	3	0	4	4	5	1
FBgn0003651	986	1541	1475	977	1738	1815	1481	1459	1732	1587	1345	1913	1553	1490	723	759	865	1188	1527	1569	1274	1869	1021
FBgn0264829	0	0	0	5	0	5	4	1	3	2	7	6	4	7	48	33	14	18	46	50	59	78	58
FBgn0264830	0	1	0	0	0	0	0	2	0	0	0	0	0	0	1	0	0	0	0	0	0	1	2
FBgn0267677	1	0	0	0	0	3	0	0	1	0	0	3	0	0	2	1	1	0	1	2	1	0	4
FBgn0264831	2	0	0	4	0	0	0	1	0	0	1	0	0	1	3	2	3	2	2	4	0	3	1
FBgn0038009	15	10	10	21	14	20	13	14	8	10	18	34	16	15	529	205	121	79	167	449	697	253	120
FBgn0259975	0	0	0	0	0	0	0	0	0	0	0	0	0	0	0	0	0	0	0	0	0	0	0
FBgn0267678	0	0	1	0	0	0	0	0	0	0	0	0	0	0	0	0	0	0	0	0	0	0	0
FBgn0038011	0	2	2	1	2	0	2	3	1	3	1	1	1	1	0	0	0	0	3	0	0	1	2
FBgn0051432	0	0	0	0	0	0	0	0	0	0	0	0	0	0	0	0	0	0	0	0	0	0	0
FBgn0038012	767	473	319	391	239	432	274	417	153	70	378	246	245	275	561	625	230	557	518	514	372	584	623
FBgn0267144	0	0	0	0	0	0	0	0	1	0	3	1	0	0	2	1	0	4	3	6	0	2	5
FBgn0267143	1	2	1	0	0	2	1	5	6	2	3	5	6	2	5	11	5	16	19	7	10	20	6
FBgn0266246	0	0	0	0	0	0	0	0	0	0	0	0	0	0	1	3	0	0	1	0	1	0	0
FBgn0266261	2	6	3	0	0	2	56	1	3	917	7830	6560	1877	3372	18495	16640	33966	20199	17919	9914	17198	8870	3765
FBgn0038013	931	762	599	693	550	715	510	591	389	245	581	457	458	371	625	651	551	510	660	547	603	543	615
FBgn0038014	25	12	9	17	0	17	0	4	1	5	1	4	13	2	8	11	3	7	7	7	6	0	6
FBgn0038016	1810	1564	1149	1291	1074	1525	1021	1252	836	610	963	1096	1098	1141	1959	1945	1303	1646	1702	1735	1351	2299	2477
FBgn0038017	3045	1305	3845	9353	1450	397	207	602	455	132	171	109	131	125	38	35	62	24	30	27	95	17	8
FBgn0065094	0	0	0	0	0	0	0	0	0	0	0	0	0	0	0	0	0	0	0	0	0	0	0
FBgn0038018	0	2	0	1	6	28	19	25	13	21	92	60	33	58	406	343	147	280	479	561	361	793	676
FBgn0042206	1972	1307	919	1195	1642	1372	1479	1990	961	3506	5006	4958	3488	2535	1610	3019	2017	2577	1527	1622	2641	1338	1362
FBgn0038020	1344	781	437	460	414	524	455	561	363	484	934	869	581	544	1314	1705	1306	1559	1638	1375	1497	1370	1478
FBgn0001149	33172	25065	20622	23664	23552	22829	24411	25968	18365	35256	71407	85665	47071	38883	34963	56355	98426	74248	23317	19091	41982	18810	18841
FBgn0267679	4	0	3	3	4	2	2	1	0	1	5	3	2	1	2	5	0	4	0	3	3	6	1
FBgn0010038	2104	1934	347	487	1999	1221	199	3973	1626	1305	581	1627	473	978	360	923	1121	1025	137	237	344	87	145
FBgn0010039	1722	1042	615	1409	551	622	509	584	374	1279	2983	8380	2248	2980	2349	4395	9380	6833	1269	732	3056	753	755
FBgn0010040	652	335	259	255	209	171	210	276	195	194	330	184	136	103	58	135	155	122	46	107	118	47	54
FBgn0010041	99	45	67	44	44	51	15	48	66	17	37	17	16	18	6	31	19	16	7	10	6	20	14
FBgn0010042	402	378	232	197	206	286	340	467	283	512	709	552	352	338	188	470	239	411	72	55	237	59	69
FBgn0010043	13443	9420	8506	9299	7858	8346	6279	6436	8075	4251	6831	4129	4723	2550	50	291	355	599	21	10	186	16	28
FBgn0010044	211	42	129	46	66	37	62	294	125	11	31	1	8	17	0	17	15	12	0	0	4	2	0
FBgn0038028	0	0	0	0	0	0	0	1	0	0	0	0	0	0	0	0	0	0	0	1	1	0	0
FBgn0038029	2	4	2	6	2	0	0	3	0	0	1	0	2	3	4	2	0	3	3	2	1	4	0
FBgn0085431	10	40	12	31	15	15	7	10	13	9	11	2	8	18	26	12	33	10	31	10	16	14	24
FBgn0053098	30	31	25	17	53	81	76	113	22	21	138	101	77	76	267	310	99	244	296	273	211	288	363
FBgn0038033	0	0	0	0	0	0	0	0	0	0	0	0	0	0	0	0	0	0	0	0	0	0	0
FBgn0038032	0	0	0	0	0	0	0	0	0	0	0	0	0	0	0	0	0	0	0	0	0	0	0
FBgn0038034	433	389	702	601	478	675	393	581	624	445	217	315	282	406	543	384	447	469	1640	1500	857	1442	1048
FBgn0286075	1584	1344	1330	1386	1380	1765	1489	1479	1057	1050	1257	1449	1253	1035	696	829	959	949	863	863	890	811	693
FBgn0038037	2549	977	1774	1474	1322	1312	1147	2175	1298	1183	1048	1043	718	1147	1171	1823	1598	1655	2276	2016	2014	1991	2038
FBgn0038038	9181	8611	10658	8749	8048	10604	10038	8505	7967	6589	9248	9116	6574	6763	4795	7581	6197	8808	4856	5008	5763	4396	5165
FBgn0038039	1671	1291	1043	1300	854	1342	1113	1212	849	677	1077	997	873	805	674	890	823	840	748	565	578	614	660
FBgn0000455	1700	1168	1621	1154	1149	1143	963	1165	894	631	949	944	646	784	969	988	905	925	1141	1037	995	1103	1058
FBgn0065087	0	0	0	0	0	0	0	0	0	0	0	0	0	0	0	0	0	0	0	0	0	0	0
FBgn0082831	2382	1947	1292	1621	1225	1929	1188	1427	949	766	787	1345	1201	1193	1766	1605	1478	1603	1472	1412	1020	1989	2120
FBgn0038042	27	65	59	43	29	37	11	40	24	12	27	21	27	36	74	53	46	42	98	85	62	68	66
FBgn0038043	1930	1428	1067	1301	987	1099	876	1103	652	415	1043	836	730	712	1243	1135	867	1053	1245	1220	962	1114	1285
FBgn0004103	9350	7538	5985	6956	5251	5833	4249	5326	3709	2592	3744	4113	3810	3602	4125	3885	4213	3828	4254	3724	3498	3832	3739
FBgn0038045	36	29	41	36	27	29	18	18	22	10	15	9	7	14	23	14	31	16	34	18	18	25	18
FBgn0038046	2539	1845	1334	1594	1275	1536	1203	1584	826	515	1462	1134	1011	1062	1767	1641	1250	1434	1353	1268	1040	1406	1611
FBgn0038047	46	34	22	17	23	25	19	20	15	19	21	18	20	21	53	42	21	27	26	35	25	37	57
FBgn0086134	7574	5407	4609	5699	4534	4829	3848	4500	3048	2139	4881	3736	3185	2787	4420	4454	3417	3846	4429	4206	3786	4336	4471
FBgn0029512	2725	2006	1519	1864	1582	1710	1239	1427	898	608	1220	1136	972	1063	1301	1175	1223	1131	1219	999	1226	971	1042
FBgn0038049	2296	1645	1428	1684	1273	1636	1171	1452	927	577	1227	948	872	959	1381	1505	933	1329	1443	1339	1073	1496	1591
FBgn0043043	25	16	13	17	4	8	5	3	11	3	9	3	1	4	5	7	10	9	7	8	7	8	2
FBgn0038051	0	0	0	0	0	0	0	0	0	0	0	0	0	0	0	0	0	0	0	0	0	0	0
FBgn0286930	0	0	0	0	0	0	0	0	0	0	0	0	0	0	0	0	0	0	0	0	0	0	0
FBgn0086687	44147	62687	77908	37076	70408	111864	80485	69573	91589	39802	43124	47588	42904	41240	12133	24738	24143	31738	14955	15381	20074	16153	11526
FBgn0286507	244	304	259	177	480	1188	839	1182	395	416	1812	1446	1255	1526	6095	5621	2147	4448	6339	7127	4911	9216	9015
FBgn0038053	436	493	585	490	440	654	569	414	382	425	510	462	374	427	1636	866	975	915	3311	3669	1981	3469	2333
FBgn0038054	7	9	28	5	17	58	32	67	20	19	152	111	66	78	489	401	162	308	583	641	405	771	652
FBgn0038055	1294	889	669	811	513	621	391	545	316	146	368	308	311	271	392	356	243	388	383	338	279	366	400
FBgn0038056	914	673	607	679	535	527	389	420	406	242	441	438	320	231	216	191	232	242	218	193	228	171	140
FBgn0038057	702	477	425	429	385	352	341	316	218	166	252	214	231	159	148	155	197	161	146	115	170	153	120
FBgn0038058	501	385	345	380	293	401	285	349	227	209	243	252	230	264	270	276	281	259	278	247	249	266	230
FBgn0013277	4	6	18	2	3	17	2	0	20	0	1	1	0	10	0	9	4	1	2	2	1	1	8
FBgn0052865	5	15	12	11	2	26	7	4	13	1	1	2	3	5	2	12	9	1	2	2	4	0	7
FBgn0051354	0	0	2	0	1	2	0	0	1	0	0	0	0	2	0	3	1	0	0	0	0	0	1
FBgn0267866	0	0	0	0	0	0	0	0	0	0	0	0	0	0	0	0	0	0	0	0	0	0	0
FBgn0013278	98	83	557	140	8	572	61	10	416	3	17	15	9	227	17	153	278	28	41	24	26	33	272
FBgn0267867	0	0	0	0	0	0	0	0	0	0	0	0	0	0	0	0	0	0	0	0	0	0	0
FBgn0013279	60	69	326	110	10	332	39	7	247	2	20	17	6	137	10	184	142	15	22	13	14	6	235
FBgn0250910	8	69	41	47	26	28	2	4	11	8	6	3	16	10	37	3	44	0	20	8	17	6	6
FBgn0028374	1	246	77	183	84	26	3	1	1	60	28	5	60	166	111	8	256	9	114	60	123	14	1
FBgn0267680	0	0	0	0	1	6	2	8	2	4	13	17	2	12	60	71	21	42	64	73	42	76	108
FBgn0038063	37	61	220	131	24	72	20	66	52	7	37	32	36	36	76	69	37	62	72	67	76	115	96
FBgn0262383	0	0	0	0	0	0	0	0	0	0	0	0	0	0	0	0	0	0	0	0	0	0	0
FBgn0267681	0	0	0	0	0	0	3	0	0	0	2	1	2	0	14	14	6	9	10	12	11	21	14
FBgn0266247	0	0	0	0	0	0	0	0	0	0	0	0	0	0	0	0	0	0	0	0	0	0	0
FBgn0005671	27095	29620	22160	28111	25079	22865	12198	33987	19067	14518	9542	12651	9749	11469	8130	9119	11271	8684	6104	7022	7066	6566	6356
FBgn0038065	3077	2602	2192	2513	2202	2582	1944	2393	1616	1159	2093	2244	1803	1752	2654	2550	1737	2253	2990	3343	2714	3393	3208
FBgn0260444	1056	672	610	635	485	597	428	502	390	264	395	395	365	319	359	371	336	389	389	297	269	338	384
FBgn0042207	14	14	12	13	11	8	5	8	7	5	10	4	10	7	24	8	4	11	10	12	13	23	13
FBgn0267682	0	0	0	0	0	0	0	0	0	0	1	1	0	0	0	2	0	0	1	0	0	2	1
FBgn0038067	4	10	2	6	8	10	2	10	10	2	7	3	12	7	4	17	6	12	7	9	9	10	12
FBgn0038068	2	0	0	0	0	0	0	0	0	0	0	1	1	2	0	0	0	0	2	1	0	0	1
FBgn0038069	0	0	0	0	0	0	0	0	0	0	0	0	0	0	0	0	1	0	0	0	0	1	0
FBgn0038070	20	29	38	85	14	8	1	20	5	7	14	2	7	11	9	4	10	1	21	16	5	12	1
FBgn0286031	0	0	0	0	0	0	0	0	0	0	0	0	0	0	0	0	0	0	0	0	0	0	0
FBgn0038071	14	151	35	65	104	55	5	31	26	66	38	32	64	210	372	71	350	64	787	484	454	880	506
FBgn0038072	187	549	360	390	146	459	467	163	190	407	563	629	730	361	319	316	487	342	296	226	306	306	348
FBgn0267146	0	0	0	0	0	0	0	0	0	0	0	0	2	1	10	13	6	12	13	10	14	17	13
FBgn0038073	3	1	2	22	0	3	1	0	3	2	5	5	6	1	25	12	4	9	7	12	9	24	34
FBgn0038074	17104	10045	5770	7012	7064	3596	4682	7112	5211	6600	13677	17847	8307	6746	7762	13345	9540	14136	12305	9779	22147	10761	11688
FBgn0263621	6	11	31	26	5	9	5	6	8	4	7	1	0	1	7	5	3	2	0	2	9	3	4
FBgn0026207	1861	1259	937	997	845	1236	954	1139	572	396	1028	866	753	801	1487	1446	831	1330	1316	1193	980	1332	1546
FBgn0038076	29	21	130	144	29	12	17	106	71	21	8	15	12	16	7	12	8	11	15	12	18	11	10
FBgn0001296	331	358	248	290	175	252	211	185	147	261	254	334	261	263	380	237	370	368	786	564	626	695	767
FBgn0005355	1060	708	525	689	516	709	548	671	393	325	583	542	445	470	576	620	517	629	576	544	489	584	631
FBgn0051347	3	10	8	9	30	51	66	83	33	37	194	131	120	140	660	552	221	443	717	819	646	893	907
FBgn0011745	3396	2521	2081	2649	2064	2214	1605	2092	1461	1080	1932	1808	1436	1363	1762	1659	1705	1631	1697	1519	1716	1327	1393
FBgn0038078	2	7	6	3	18	30	18	38	9	14	104	63	36	41	300	243	101	191	339	440	290	461	475
FBgn0038079	383	112	48	125	67	143	4	81	2	79	125	9	49	4	9	64	67	11	40	14	8	8	8
FBgn0016693	10229	8663	9678	9964	9650	8890	5441	8050	7472	3303	4258	4827	4182	3907	3195	3270	4261	3878	2172	1790	2281	1968	2072
FBgn0038080	581	454	371	471	470	437	348	408	318	243	484	380	269	277	363	333	335	274	445	435	483	429	352
FBgn0002905	1743	976	659	779	458	781	495	552	285	157	292	408	409	397	685	587	381	495	453	337	242	547	629
FBgn0002719	30086	31492	38317	24178	46635	45147	33397	34300	44339	8169	13577	11974	11414	11114	8147	12441	8484	9134	8447	9951	9490	9433	9874
FBgn0265162	8	3	3	6	4	22	16	26	4	4	20	10	10	16	37	48	11	35	33	47	23	43	47
FBgn0038082	2488	1498	1609	1370	296	306	786	805	337	255	222	184	127	434	8	107	68	89	312	13	102	12	12
FBgn0038083	956	753	685	430	316	385	755	806	297	484	473	696	298	447	701	1059	864	653	2314	2216	1031	1775	1891
FBgn0267958	4	6	5	2	5	11	8	14	4	6	20	13	9	21	40	49	16	42	36	39	26	39	57
FBgn0038084	12	36	24	25	15	16	0	13	14	5	11	0	14	20	24	5	27	12	36	18	24	23	13
FBgn0265164	0	0	0	0	0	0	0	0	0	0	0	0	0	0	0	0	0	0	0	0	0	0	0
FBgn0265163	0	0	0	0	0	0	0	0	0	0	0	1	0	0	0	0	0	0	0	0	0	0	0
FBgn0051345	0	6	33	43	2	1	1	1	2	1	2	1	3	1	3	1	3	0	2	0	4	0	3
FBgn0267937	0	0	0	0	0	0	0	0	0	0	1	0	0	0	1	0	0	0	0	0	0	3	1
FBgn0038087	2	52	32	53	9	19	3	8	7	5	2	0	19	22	5	0	15	3	27	11	23	14	3
FBgn0267147	0	0	0	0	0	0	0	0	0	0	0	0	0	0	1	0	0	0	0	2	0	0	2
FBgn0265165	0	0	0	0	0	0	0	0	0	0	0	0	0	0	0	0	0	0	0	0	0	0	0
FBgn0038088	219	258	176	282	211	370	246	372	150	143	569	341	338	344	1433	1232	665	919	1377	1467	1094	1535	1399
FBgn0267938	0	0	0	0	0	1	0	0	2	0	0	0	0	0	2	2	1	2	0	3	3	4	0
FBgn0265166	0	0	0	0	0	1	1	1	0	1	1	1	0	3	15	10	2	12	11	16	12	23	23
FBgn0038089	3	9	2	1	14	23	19	34	15	13	83	30	43	37	231	238	57	164	267	327	222	352	343
FBgn0053929	0	0	0	0	0	0	0	0	0	0	0	0	0	0	0	0	0	0	1	0	0	0	0
FBgn0038090	0	1	1	0	6	20	15	20	7	22	93	68	51	60	395	323	144	267	360	382	247	468	482
FBgn0038092	11	30	37	28	18	29	8	20	11	17	18	19	26	40	47	61	51	37	84	91	55	68	79
FBgn0265167	0	0	0	0	0	0	0	0	0	0	0	0	2	0	7	2	2	0	1	4	0	3	5
FBgn0040493	4605	3193	3185	4393	2459	2754	2179	2615	1593	1024	2152	2245	1790	1731	4081	3243	2435	3035	4263	4469	3562	5043	5100
FBgn0087021	281	291	191	193	138	225	137	185	79	57	116	107	126	144	244	177	202	161	240	147	172	175	177
FBgn0038095	496	418	1283	1238	307	354	326	568	245	184	281	244	188	233	277	275	251	284	1354	1107	252	648	1140
FBgn0038097	20	27	21	25	70	127	86	132	40	43	212	135	130	126	411	442	161	335	402	440	285	542	526
FBgn0038098	966	74	1948	365	145	124	164	511	770	60	108	14	12	180	10	97	67	100	19	11	350	32	11
FBgn0038099	10	14	5	8	3	6	9	9	0	4	3	4	17	7	29	13	13	21	70	32	28	49	68
FBgn0038100	1716	1856	1105	1135	1171	1931	1206	2001	792	688	1682	1673	1510	1758	3878	4072	2150	3420	4102	4349	3205	4873	4236
FBgn0051342	1454	1035	660	907	577	882	591	796	437	288	326	653	597	638	952	872	679	755	762	583	550	922	853
FBgn0038102	4	12	11	0	11	66	42	47	23	24	128	77	81	83	505	439	168	342	556	660	430	776	825
FBgn0041710	215	147	236	213	157	220	201	241	106	253	342	409	248	354	2437	1363	810	1090	3579	3924	2055	4292	3773
FBgn0038105	3452	2497	2798	2871	1614	1977	1963	1299	1399	1131	1387	1233	1123	947	131	296	241	349	95	49	111	75	83
FBgn0038106	1003	679	608	733	507	626	449	546	383	196	458	432	406	312	434	453	313	423	373	408	320	384	426
FBgn0265083	0	0	0	0	0	0	0	0	0	0	0	0	0	0	0	0	0	0	0	0	0	0	0
FBgn0038107	0	0	0	0	0	0	0	0	0	0	0	0	0	0	0	0	0	0	0	0	0	0	0
FBgn0038108	5826	3765	2324	3274	1832	3316	1839	2271	1450	877	1217	1619	1775	1821	2281	2149	1618	1981	1565	1467	989	2211	2523
FBgn0038110	881	610	558	589	541	493	483	592	415	320	546	526	374	339	860	542	475	511	1068	1028	768	1218	792
FBgn0038109	12	34	28	8	85	203	160	209	49	63	348	261	220	272	1031	1011	403	792	1027	1216	839	1422	1487
FBgn0020496	5915	5895	4155	4445	4259	4615	3323	4042	3106	2337	2452	3318	3230	3208	2829	2155	3452	2409	3023	2400	2772	2407	1635
FBgn0283438	2960	2691	2425	2091	2252	3141	2730	2871	1833	2335	3560	4310	3327	3191	4556	4663	4029	4584	4572	4789	4339	5181	4863
FBgn0283439	9	14	5	7	20	30	25	31	6	11	69	50	29	38	202	160	64	129	239	227	182	266	255
FBgn0002354	509	322	349	320	268	298	215	297	191	107	210	203	154	134	215	203	117	161	193	153	153	135	191
FBgn0003308	3050	2656	2254	2204	2109	1876	1998	2671	1457	1443	1422	1783	1709	1048	727	673	609	822	1406	1696	1107	1334	1365
FBgn0038113	89	22	34	67	31	30	15	67	23	13	28	13	26	9	26	12	29	4	20	17	24	21	16
FBgn0003450	33	19	34	56	18	21	4	36	25	11	22	28	19	25	40	69	28	44	63	83	66	120	115
FBgn0038114	37	55	68	65	24	47	6	4	22	11	38	19	14	20	37	34	23	17	32	17	22	36	24
FBgn0266615	0	2	0	0	0	2	1	4	0	0	1	0	1	0	1	0	1	2	1	1	2	1	3
FBgn0001217	662	617	458	327	507	1324	797	1316	453	344	1665	1139	1183	1355	4383	4477	1604	3366	3976	4466	2946	5838	6371
FBgn0051157	0	5	13	5	1	24	4	2	3	0	4	0	4	2	10	3	1	3	4	3	10	22	12
FBgn0038115	4506	3744	3633	3509	6298	4042	4580	4276	4480	3574	5555	5106	4844	3341	2139	2530	2121	2652	2772	4647	4393	2388	2804
FBgn0260962	6774	4787	3457	4027	3206	4129	2776	3160	2008	1369	1904	2539	2348	2155	2345	2500	1970	2325	1865	1557	1388	1934	2279
FBgn0004666	23	26	11	18	10	25	8	15	4	6	10	10	6	20	42	15	41	22	50	41	24	27	21
FBgn0266302	0	0	0	0	0	0	0	0	0	0	0	0	0	2	0	0	0	0	0	0	0	0	0
FBgn0262365	0	0	0	0	0	0	0	0	0	0	0	0	0	0	0	0	0	0	0	0	0	0	0
FBgn0038118	653	525	494	410	350	429	351	323	218	210	322	285	325	306	440	433	367	337	417	453	414	434	480
FBgn0085337	61	29	36	20	36	95	70	105	26	29	127	101	91	101	450	443	155	360	502	513	398	694	701
FBgn0267683	1	1	1	2	1	3	9	1	4	2	8	7	1	11	19	21	5	11	14	19	16	18	22
FBgn0260793	6	173	73	140	44	67	2	10	32	32	16	3	52	125	61	2	184	4	124	79	92	49	26
FBgn0266578	0	0	0	0	0	0	0	0	0	0	0	0	0	0	0	0	0	0	0	0	0	0	0
FBgn0038122	0	4	2	0	14	52	33	68	11	44	176	127	84	125	629	582	193	424	694	773	556	978	950
FBgn0038123	2	1	6	0	6	23	26	39	5	22	93	76	69	91	602	507	191	410	691	775	480	862	835
FBgn0038124	0	1	3	0	1	9	6	28	0	8	26	23	15	30	181	172	47	141	203	273	188	289	269
FBgn0038125	87	79	59	53	82	185	124	163	65	56	261	175	145	170	561	585	213	468	542	627	456	663	734
FBgn0038126	769	269	310	401	262	96	75	335	268	75	67	47	50	39	31	33	90	23	64	24	65	11	11
FBgn0038127	0	4	7	0	26	54	42	73	20	44	207	136	121	144	900	712	237	538	910	1167	765	1225	1155
FBgn0000024	325	515	389	473	222	301	150	186	213	189	200	158	270	415	316	248	628	257	475	318	375	514	235
FBgn0040551	1882	1179	1069	1079	618	614	408	865	574	259	334	246	233	243	442	475	277	248	1066	758	404	887	702
FBgn0038128	468	324	246	278	241	287	241	345	186	118	249	200	188	172	326	317	222	242	274	256	223	273	289
FBgn0003598	1706	1266	745	941	718	1216	754	776	498	401	537	667	657	847	930	845	840	847	806	686	564	781	812
FBgn0038129	1127	1016	904	733	1119	1188	1106	1295	717	1015	1360	1557	1239	1103	1557	1115	1031	1413	2441	2151	1764	2282	2048
FBgn0038130	588	776	1111	1682	389	607	126	740	1183	212	284	189	251	84	97	126	181	59	34	28	101	29	5
FBgn0038131	0	0	0	0	0	0	0	0	0	0	0	0	0	0	0	0	0	0	0	0	1	0	0
FBgn0038132	414	12	787	1568	3	8	6	3	6	3	0	0	0	1	0	2	1	1	5	1	0	2	0
FBgn0038133	1	0	0	0	2	1	2	3	0	0	2	0	0	0	0	1	0	1	1	1	2	1	1
FBgn0038134	23	2	35	4	9	21	0	13	13	10	1	0	0	5	0	0	1	0	0	0	0	0	0
FBgn0038135	1638	335	8407	782	966	725	408	1264	2155	542	248	150	89	1207	41	666	448	1029	26	30	859	106	15
FBgn0038136	5690	878	14138	935	6729	7513	332	7931	9534	5868	278	22	0	3129	0	1211	835	886	0	0	80	3	0
FBgn0052473	10637	3459	19958	3612	10600	12471	2345	10730	13331	9606	2248	2176	1835	5971	2699	5072	3614	3899	2607	2645	1933	3061	3106
FBgn0262844	35	0	91	3	11	8	1	6	32	2	0	0	1	5	0	4	3	13	0	1	0	0	0
FBgn0264991	0	0	0	0	0	0	0	0	0	0	0	0	0	0	0	0	0	0	0	0	0	0	0
FBgn0286885	7	1	9	2	7	4	2	3	2	4	1	0	2	2	4	2	0	1	1	5	2	1	1
FBgn0266455	0	0	0	0	0	0	0	0	0	0	0	0	0	2	1	0	0	0	0	1	1	0	0
FBgn0038139	3	14	76	87	5	5	2	3	7	3	2	1	7	5	8	1	5	1	16	6	15	11	4
FBgn0038140	26	115	44	91	15	27	23	22	24	7	8	4	8	21	4	0	13	1	23	5	6	4	13
FBgn0045442	1	3	1	2	0	1	8	4	1	6	0	5	9	0	5	3	9	7	9	3	12	9	7
FBgn0086371	1887	1315	1173	1279	1224	1442	1006	1212	939	530	1212	959	774	693	1531	1385	1080	1226	1516	1516	1280	1520	1591
FBgn0027610	8242	7520	7228	6224	8055	7432	4268	6977	6379	2248	2152	2017	2019	2087	1141	1349	1693	1060	731	784	853	736	777
FBgn0038142	5	9	5	6	1	7	3	0	2	1	1	0	0	1	0	1	1	0	1	1	0	2	1
FBgn0023495	143	98	111	89	89	115	73	58	85	25	65	34	40	25	20	29	14	28	34	31	28	33	35
FBgn0259831	0	0	0	0	0	0	0	0	0	0	0	0	0	0	0	0	0	0	1	0	0	0	0
FBgn0038143	45	155	92	111	78	69	22	31	31	41	43	19	62	104	92	62	146	60	128	87	94	83	83
FBgn0264987	164	49	45	34	13	23	14	24	16	55	10	4	5	55	5	19	11	6	2	0	0	3	0
FBgn0038144	6	10	4	16	8	16	11	24	11	16	15	10	25	17	42	69	20	32	59	49	31	64	60
FBgn0044511	1233	809	759	987	748	730	473	628	508	195	496	348	288	265	338	372	292	381	338	363	350	324	388
FBgn0038145	17413	13922	10382	11503	9687	12313	7526	9456	7450	3832	7960	7062	6891	6596	9894	10467	6329	9384	9791	10198	7967	11104	11424
FBgn0038146	2624	1708	1545	1547	1358	1199	875	807	806	411	602	648	646	464	403	343	325	342	344	247	313	310	287
FBgn0038147	3396	4371	5555	4684	5615	6497	4716	4604	5113	2139	3528	3717	2780	2484	1845	2319	1894	2787	2287	2969	2369	2562	1958
FBgn0040553	2	0	0	0	0	0	0	4	0	0	1	0	0	0	0	0	0	0	1	0	0	0	0
FBgn0038148	0	1	0	0	0	0	0	0	0	0	0	0	0	0	0	2	0	0	0	2	1	0	1
FBgn0038149	1289	2149	1838	2585	1161	1746	1405	1636	1269	1748	2001	2527	1834	1888	1649	1294	2777	1267	1532	973	1722	913	597
FBgn0053977	427	309	299	288	250	343	235	372	188	198	380	268	242	218	304	318	466	374	294	218	314	224	125
FBgn0038150	0	14	2	3	5	3	0	1	0	4	0	10	1	7	19	2	16	3	22	2	15	1	1
FBgn0038151	0	40	17	22	10	9	4	7	20	1	1	33	3	14	61	29	46	23	50	32	96	38	39
FBgn0041711	0	70	22	58	21	43	0	44	33	33	3	58	3	10	38	38	65	17	6	23	78	7	3
FBgn0038153	0	0	0	0	0	2	0	1	0	0	1	2	1	1	1	0	0	0	0	0	2	3	1
FBgn0267151	3	5	0	3	1	5	5	2	0	1	2	12	3	2	6	7	2	8	12	8	6	11	7
FBgn0000046	1019	1830	2757	3308	1022	1952	384	1922	1414	1039	601	856	443	711	1804	1165	1891	1068	1109	1604	2323	1797	1803
FBgn0004049	1253	1112	804	865	673	1209	782	1108	557	515	668	946	727	846	1151	1181	1016	1106	906	825	729	1091	1158
FBgn0261814	0	0	0	0	0	0	0	0	0	0	0	0	0	0	15	9	6	4	7	11	9	10	16
FBgn0267239	0	0	0	0	1	0	0	0	0	0	0	0	0	0	0	0	0	0	0	0	0	0	0
FBgn0038156	47	142	106	173	55	66	21	75	62	25	20	15	40	84	84	10	117	17	103	54	69	31	25
FBgn0040554	0	0	2	0	0	1	0	0	0	0	0	0	0	1	0	0	0	0	0	0	0	0	0
FBgn0286034	0	3	1	5	5	3	3	14	5	3	3	7	2	4	12	6	5	5	4	6	8	12	7
FBgn0262323	0	0	0	0	0	0	0	0	0	0	0	0	0	0	0	0	0	0	0	0	0	0	0
FBgn0267574	0	4	1	1	1	0	1	3	2	1	1	1	0	3	0	0	0	0	3	1	2	1	2
FBgn0267149	0	0	1	0	0	0	1	2	0	0	7	2	2	4	16	12	7	18	31	20	34	39	27
FBgn0038157	0	0	2	0	0	0	2	1	0	0	0	1	2	3	3	0	5	9	5	2	3	2	8
FBgn0261846	8	15	14	1	18	77	33	62	23	19	108	54	57	73	193	242	72	197	275	338	246	393	192
FBgn0284419	0	0	0	1	0	0	0	4	0	0	4	3	0	0	11	8	1	3	4	4	4	6	9
FBgn0051337	104	92	55	102	75	99	190	194	52	82	67	97	125	138	93	97	114	154	277	128	179	185	157
FBgn0264430	0	1	0	0	1	3	1	4	0	3	0	2	3	4	11	6	5	6	7	4	7	19	11
FBgn0038158	153	84	79	67	60	147	95	132	56	30	149	88	93	133	340	317	144	271	333	316	254	401	387
FBgn0038159	0	0	4	1	3	10	8	12	4	1	14	9	10	16	59	58	40	39	101	107	80	116	91
FBgn0038160	0	1	0	0	0	0	0	1	0	0	0	0	0	0	0	0	0	0	0	1	4	1	0
FBgn0003060	25	94	7693	7211	27	24	12	9	24	0	8	570	27	4	665	279	411	184	0	2	2018	114	15
FBgn0038161	141	462	519	558	152	366	7	446	199	206	22	0	12	40	144	106	168	36	1	119	69	6	1
FBgn0267240	0	1	0	0	0	0	0	0	0	0	0	0	0	0	0	0	0	0	0	0	0	0	0
FBgn0267154	0	0	0	0	0	0	0	0	0	0	0	0	0	0	0	0	0	0	0	0	0	0	0
FBgn0038163	258	261	196	151	314	881	532	794	303	247	1122	985	880	992	3507	3410	1227	2732	3189	3558	2163	4558	4860
FBgn0263396	16126	17502	14219	14746	13210	13871	10360	12513	10446	7973	7360	11070	10714	8895	6702	6053	8051	6420	5755	4808	6126	5675	4650
FBgn0015778	11985	11004	6952	8059	6014	8963	5725	7028	4400	3610	4216	6464	6537	6223	8505	8260	6438	7299	7793	7491	5901	10054	9345
FBgn0010258	4165	2439	1545	1941	1336	2452	1544	2288	825	412	1746	1457	1299	1428	2306	2659	1108	2339	1590	1558	1029	1887	2474
FBgn0004237	10540	8146	5953	7041	6013	7271	4874	5873	3633	2410	4787	4839	4396	4387	7023	6451	4596	5624	5751	4974	4470	5547	5795
FBgn0004587	10297	8971	7064	8131	6485	6845	5424	5978	4075	2968	4638	4416	4282	4051	4793	3331	4682	3445	4272	3389	3689	3276	3342
FBgn0038165	7	255	86	160	97	51	3	4	25	43	22	14	92	173	218	77	307	71	259	168	187	221	184
FBgn0038166	1282	875	652	827	638	900	581	766	458	347	751	600	478	519	723	719	543	704	782	726	671	712	693
FBgn0038167	1828	1257	960	1129	831	1183	833	1021	697	434	847	780	782	720	1597	1567	766	1380	1352	1434	990	1952	2018
FBgn0038168	1383	893	706	788	631	953	604	769	475	316	596	615	587	569	977	910	581	837	854	921	694	969	1073
FBgn0024555	2582	2221	1426	1696	1332	1916	1153	1354	1020	787	824	1138	1259	1332	1517	1301	1427	1305	1640	1337	1232	1729	1515
FBgn0038170	4	9	4	8	6	4	7	16	2	2	10	5	7	5	9	20	6	7	6	9	13	12	10
FBgn0028487	1019	764	583	536	558	867	621	842	405	322	814	870	774	744	2379	2338	966	1765	2129	2291	1542	3192	3337
FBgn0002937	1	8	0	2	4	0	2	2	0	1	1	3	2	4	12	5	5	10	15	11	7	7	12
FBgn0038172	4727	3111	3196	2582	2222	2739	2481	1695	1849	1339	2066	1840	1775	1357	1271	1226	860	1282	3280	2457	1612	2314	2238
FBgn0038173	371	240	203	185	128	147	89	127	146	17	43	30	30	27	16	13	11	11	21	4	10	24	9
FBgn0051469	57	23	26	26	23	37	32	46	10	29	35	29	16	28	18	20	22	16	16	14	27	22	16
FBgn0040077	0	0	0	0	0	0	0	0	0	0	0	0	0	0	0	0	0	0	0	0	0	0	0
FBgn0040076	0	0	0	0	0	0	0	0	0	0	0	0	0	0	0	0	0	0	0	0	0	0	0
FBgn0054044	1	0	0	2	9	1	5	4	3	0	0	3	4	1	3	2	3	3	8	12	8	7	7
FBgn0085412	170	452	316	454	145	286	84	160	159	111	31	67	135	246	171	55	346	58	211	114	182	117	53
FBgn0267383	32	65	48	31	116	280	187	313	96	83	580	326	297	348	1277	1274	492	969	1541	1585	1159	1795	1962
FBgn0038179	754	675	399	633	461	364	256	461	273	146	258	272	202	178	51	142	117	91	29	24	75	20	32
FBgn0038180	1031	238	446	576	279	68	26	75	112	20	12	31	11	18	48	50	29	16	121	60	91	76	19
FBgn0038181	435	660	4754	3481	164	1396	197	306	968	271	48	635	150	241	226	102	361	235	26	29	1201	114	28
FBgn0260464	0	0	0	0	0	0	0	0	0	0	0	0	0	0	0	0	0	0	0	0	0	0	0
FBgn0259721	0	0	0	0	0	0	0	0	0	0	0	0	0	0	0	0	0	0	0	0	0	0	0
FBgn0038183	2066	1444	1323	1413	1216	1095	810	842	702	421	815	592	633	467	389	345	457	371	419	358	497	311	310
FBgn0000454	7937	6193	8222	5674	8018	7160	5117	7460	5800	3613	4623	4889	4185	4407	3004	3318	3173	3426	3799	3955	3639	4380	3713
FBgn0267150	0	0	0	1	2	0	1	2	0	0	1	1	3	5	7	7	1	6	6	4	4	14	13
FBgn0051588	0	0	0	0	0	0	0	0	0	0	0	0	0	0	0	0	0	0	0	0	0	0	0
FBgn0051331	0	0	0	0	0	0	0	0	0	0	0	0	0	0	0	0	0	0	0	0	0	0	0
FBgn0259730	0	0	0	0	0	0	0	0	0	0	0	0	0	0	0	0	0	0	0	0	0	0	0
FBgn0259732	0	0	0	0	0	0	0	0	0	0	0	0	0	0	0	0	0	0	0	0	0	0	0
FBgn0259731	0	0	0	0	0	0	0	0	0	0	0	0	0	0	0	0	0	0	0	0	0	0	0
FBgn0259733	0	0	0	0	0	0	0	0	0	0	0	0	0	0	0	0	0	0	0	0	0	0	0
FBgn0263650	4	9	3	35	5	6	6	8	2	9	15	6	14	12	10	6	8	10	63	27	10	38	50
FBgn0263651	3	4	0	9	1	0	1	0	0	0	1	0	0	1	1	0	3	1	9	4	1	3	2
FBgn0002862	212	242	220	121	306	941	549	980	300	244	1433	903	826	890	3827	3745	1439	3062	4627	4942	3751	5107	5088
FBgn0262992	5	2	3	2	0	3	3	1	1	0	1	4	3	0	5	6	0	10	14	9	8	6	5
FBgn0266464	2199	1759	1431	1736	1525	1674	1272	1488	1101	893	1048	1630	1239	1088	1177	1326	1282	1280	1309	1130	1172	1095	1188
FBgn0051495	127	103	101	78	104	89	79	121	55	65	111	87	69	84	149	126	97	92	136	112	142	143	108
FBgn0286915	0	0	0	0	0	0	0	0	0	0	0	0	0	0	0	0	0	0	0	0	0	0	0
FBgn0038186	12	16	13	11	40	114	71	106	40	40	168	125	125	131	411	367	168	386	451	430	316	555	487
FBgn0267959	0	0	0	0	1	2	0	7	2	7	18	9	9	10	85	64	19	48	72	75	80	104	88
FBgn0008646	29	34	25	34	13	22	13	27	28	8	25	13	15	28	45	14	47	23	98	56	63	81	30
FBgn0000576	117	137	75	69	39	60	41	53	61	11	30	39	43	38	77	29	62	28	89	56	105	103	25
FBgn0038188	9	18	16	12	22	52	40	70	12	11	71	45	35	63	144	119	37	104	138	106	71	140	117
FBgn0038189	290	235	177	152	117	322	198	262	94	51	223	167	151	172	349	417	133	325	301	312	164	280	346
FBgn0047199	562	295	190	254	165	251	148	240	50	41	185	121	118	152	270	252	100	226	200	212	123	196	260
FBgn0038190	829	450	298	437	269	381	195	333	140	44	217	150	142	141	246	280	103	255	201	191	117	185	239
FBgn0016672	762	620	413	567	357	513	279	506	262	155	304	197	197	306	422	352	376	361	385	389	306	313	314
FBgn0038191	1784	833	552	828	431	541	324	395	183	62	193	184	181	188	295	334	139	329	205	191	133	261	329
FBgn0015270	356	276	191	206	182	197	143	139	79	79	118	159	154	136	131	141	143	113	111	61	87	103	97
FBgn0264493	2200	2070	1651	2100	1503	1453	950	1288	1023	840	699	1087	1057	905	1048	930	1079	999	1107	1205	1010	1216	1109
FBgn0286041	0	1	1	4	0	2	0	1	0	0	0	0	0	3	0	0	0	2	0	0	0	0	1
FBgn0263414	0	0	0	0	0	0	0	0	0	0	0	0	0	0	0	0	0	0	0	0	0	0	0
FBgn0038194	4574	1941	2996	1999	965	1223	1292	997	937	1000	956	871	751	745	794	626	233	423	3524	1968	812	3460	1396
FBgn0038195	3287	2779	2880	3179	2272	2774	2268	2562	1809	1506	2316	2371	1951	1850	2873	2730	2502	2729	2874	2709	2428	3005	3005
FBgn0038196	3020	2169	1962	2082	1853	1837	1351	1574	1111	674	1464	1247	1058	833	1206	1254	780	1162	1302	1330	1197	1390	1352
FBgn0011971	0	0	0	0	0	0	1	1	0	0	1	0	0	0	0	0	0	0	0	0	0	0	0
FBgn0038197	984	1346	1184	1021	1388	1439	1280	1125	1127	886	654	1375	1188	1013	734	606	790	797	1082	1217	1011	1488	906
FBgn0038198	478	348	781	594	242	202	38	289	145	59	59	75	61	50	98	102	96	79	96	101	162	95	72
FBgn0038199	8	6	18	10	6	8	1	9	12	4	2	1	1	15	13	7	9	9	7	11	3	11	5
FBgn0038200	128	281	179	80	412	1105	780	1328	344	350	2113	1410	1184	1458	5909	5639	2047	4207	6238	7546	4745	8998	7553
FBgn0038201	6	0	3	0	1	10	2	3	0	2	1	5	0	6	10	15	3	9	8	12	11	16	16
FBgn0038202	93	130	92	67	94	181	95	151	65	48	170	130	176	213	457	421	248	340	429	464	350	555	541
FBgn0265168	356	237	117	210	104	148	73	118	48	27	63	62	53	54	76	99	37	106	58	58	38	74	87
FBgn0038203	3	0	1	0	0	2	0	1	1	0	0	1	0	0	5	3	2	2	6	2	4	4	7
FBgn0038204	271	176	94	132	64	122	62	66	30	5	29	46	35	44	38	56	20	49	37	34	24	43	36
FBgn0038205	6	11	4	10	3	7	4	4	2	4	2	1	0	3	3	4	6	10	3	6	3	9	3
FBgn0020510	1927	1657	1203	1335	1186	1463	1051	1465	879	616	1027	1204	1071	1103	1282	1345	980	1226	1207	1096	914	1328	1340
FBgn0038206	1027	783	604	707	648	923	627	949	526	351	797	724	555	657	1124	1185	891	1062	1095	1069	945	1146	1094
FBgn0010340	1136	815	817	985	549	715	589	631	450	259	437	415	306	356	337	395	262	388	350	293	305	308	304
FBgn0262955	3645	3063	2490	2945	1917	2702	2038	1892	1497	1307	1574	1751	1616	1683	1666	1386	2129	1741	1847	1505	1503	1533	1475
FBgn0038207	121	69	99	161	45	62	9	97	20	26	45	9	29	20	189	63	93	31	29	63	56	16	27
FBgn0038208	3	70	90	18	241	803	495	793	238	325	1423	1260	1138	1263	5666	5285	1833	4114	5069	6212	3937	8370	8721
FBgn0260226	1	14	1	0	5	5	18	2	10	1	12	168	6	3	3139	1154	804	349	13	50	2566	177	11
FBgn0038209	0	13	6	3	8	23	28	44	15	9	109	65	50	81	423	350	119	286	391	463	284	648	565
FBgn0265146	0	8	0	0	24	4	0	5	6	0	5	21	1	1	53	4	15	2	0	0	21	2	0
FBgn0051533	29	50	36	17	86	259	185	276	110	92	409	334	307	377	1615	1537	536	1111	1646	1878	1229	2374	2432
FBgn0051327	7	30	37	7	111	291	192	288	104	105	520	422	395	470	2112	1938	680	1472	1975	2039	1292	2916	3059
FBgn0038210	0	6	8	0	18	54	47	64	27	21	188	114	109	127	598	530	216	462	647	829	513	904	980
FBgn0011582	9	101	43	88	16	30	0	6	19	28	5	5	28	56	31	16	64	15	29	28	22	15	20
FBgn0038211	22	11	10	13	4	14	9	4	11	3	1	1	2	2	0	0	0	0	0	1	1	2	1
FBgn0051326	12	19	20	21	40	42	31	35	28	24	16	24	21	36	27	42	27	48	85	19	36	24	21
FBgn0053109	0	0	0	0	0	0	1	0	0	0	0	1	0	0	0	0	1	0	2	0	0	0	0
FBgn0053329	25	15	26	43	8	19	12	41	22	4	7	7	12	17	27	13	16	19	20	8	69	12	3
FBgn0027563	4	5	3	4	1	0	2	1	1	0	7	0	1	4	6	2	4	3	6	5	10	13	5
FBgn0038213	2	2	6	0	8	40	19	43	7	17	105	78	61	80	567	417	150	314	509	671	433	818	772
FBgn0262983	782	917	1055	722	909	905	1036	789	807	498	732	716	548	461	283	260	195	311	126	132	197	140	113
FBgn0038214	2268	2324	2765	2503	1741	2062	2073	1697	1667	1226	1757	1795	1328	1181	1568	1275	763	1273	1165	1216	1082	974	1162
FBgn0027083	1260	959	798	954	586	849	549	631	512	194	441	390	347	351	495	543	294	461	403	383	327	454	513
FBgn0262808	990	1162	1075	1164	883	1281	1063	920	808	743	1013	949	755	731	151	387	247	445	174	102	152	73	90
FBgn0038217	1	2	7	0	30	73	52	90	26	22	217	129	85	136	743	619	244	475	760	890	573	984	1160
FBgn0038218	4	2	6	1	13	32	19	57	10	22	86	73	64	50	386	404	105	235	402	458	314	589	556
FBgn0038219	0	4	1	1	4	16	14	34	7	14	84	53	48	39	357	272	101	217	427	530	299	568	587
FBgn0003862	1665	1554	953	1181	771	1664	948	1003	694	577	371	887	966	1094	1342	1120	1322	1108	965	787	780	1178	1049
FBgn0267684	0	0	1	0	1	4	3	2	0	0	5	0	0	2	38	29	14	31	35	40	33	65	42
FBgn0267156	2	0	3	2	4	2	0	9	0	8	0	0	0	0	0	3	2	0	0	3	3	0	0
FBgn0285913	1290	1093	979	1005	872	1151	798	1189	796	710	871	1016	834	968	1877	1779	1158	1624	1706	2039	1446	2376	2177
FBgn0038221	66	42	43	54	23	53	17	43	14	21	20	19	36	25	36	36	27	27	54	58	31	50	43
FBgn0003567	1065	962	810	849	774	884	678	676	536	496	515	811	674	654	865	660	882	620	787	591	736	713	658
FBgn0004855	995	811	679	723	706	706	522	680	411	283	532	530	429	400	499	467	470	412	502	406	479	370	434
FBgn0051321	54	64	37	26	26	32	13	58	78	14	8	56	23	25	73	23	56	24	23	20	126	38	20
FBgn0013767	16	105	60	53	44	47	2	15	17	19	21	2	38	41	30	2	71	6	76	25	40	21	12
FBgn0011474	1243	1088	779	924	667	812	598	626	416	372	402	575	568	622	694	535	630	591	750	538	581	724	615
FBgn0038223	1158	848	629	703	560	945	587	743	407	324	521	682	640	717	1320	1312	862	1129	1279	1304	874	1609	1812
FBgn0038224	15727	11154	10325	11683	10645	10322	7785	9995	9319	4002	8414	5983	5488	4679	3226	4125	3122	3533	2670	2673	2839	2249	2588
FBgn0003480	59	83	57	75	53	118	87	78	36	34	67	54	63	63	87	112	77	108	122	115	88	121	121
FBgn0024321	606	472	313	366	298	531	296	537	188	150	253	258	272	374	471	519	349	417	375	391	301	458	503
FBgn0051320	279	299	194	164	356	636	410	623	248	245	667	753	674	820	2140	2314	990	1746	2246	2444	1639	2969	2994
FBgn0086058	0	0	0	0	0	0	0	0	0	0	0	0	0	0	0	0	0	0	0	0	0	0	1
FBgn0266248	0	0	0	0	2	9	5	9	4	3	26	12	8	32	90	101	34	79	101	109	87	133	146
FBgn0038225	83	167	88	40	170	465	300	509	139	161	752	638	532	683	2684	2363	908	1901	2837	3502	2231	4492	3551
FBgn0285955	826	958	934	847	835	1484	1055	926	928	928	663	1418	1141	977	897	891	1289	1012	1141	914	883	1239	826
FBgn0262327	0	0	0	0	0	0	0	0	0	0	0	0	0	0	0	0	0	0	0	0	0	0	0
FBgn0085417	0	34	24	22	21	18	0	0	0	13	6	3	16	27	15	3	41	3	25	6	19	5	1
FBgn0265065	3	3	1	1	3	12	5	16	5	5	18	9	16	17	60	77	34	55	85	79	69	83	73
FBgn0265066	0	0	0	0	0	2	1	0	3	0	0	1	1	2	0	0	2	2	3	4	0	2	2
FBgn0038233	550	422	403	443	387	544	348	508	319	195	423	405	332	399	846	879	406	703	1073	1165	778	1216	1332
FBgn0038234	1085	726	675	767	598	570	407	549	513	156	360	239	281	243	293	300	186	248	219	186	208	230	229
FBgn0038235	347	236	214	249	260	234	173	175	147	94	205	159	154	125	181	173	151	144	166	191	150	184	153
FBgn0038237	220	419	353	251	243	448	193	229	236	237	137	269	298	218	54	86	141	146	108	108	125	122	89
FBgn0085302	1976	18738	1273	2139	166	375	159	11	66	32	143	31	39	8	10	4	8	1	3	2	1	8	5
FBgn0038236	11	18	4	1	7	11	11	5	5	14	5	1	12	6	0	3	0	0	0	1	0	0	0
FBgn0267685	0	0	0	0	0	0	0	0	0	0	0	0	0	0	0	0	0	0	0	0	0	0	0
FBgn0267686	0	1	0	0	0	3	2	0	1	0	3	0	2	3	2	1	0	8	5	4	2	6	2
FBgn0267687	0	0	2	0	1	4	3	3	1	1	7	8	5	6	74	58	17	27	68	66	56	66	67
FBgn0038238	10	15	5	14	8	8	1	4	2	2	3	7	2	2	6	3	0	0	5	1	2	3	0
FBgn0038239	9433	17930	7875	4166	8599	19383	7951	1813	11478	4106	9755	9139	6789	6072	7379	2660	8109	5999	7180	2830	7087	5280	4604
FBgn0038240	5203	39098	6297	13176	363	1178	352	52	495	329	485	341	600	281	202	183	378	175	230	216	415	181	163
FBgn0038241	2517	3803	1941	3754	1636	5619	3372	698	2596	2773	7435	5867	4923	4528	4595	2792	5811	3399	4121	1853	6588	2581	2086
FBgn0038242	6052	16314	5815	2677	5057	12420	7276	1990	6540	3640	10610	10911	8279	8945	13437	4325	12375	6425	13927	5568	12348	8629	5207
FBgn0051313	7670	8892	9649	6442	8020	10807	10281	8953	7178	5872	11602	10829	7326	7628	7985	11534	6202	9657	5706	4959	8297	4046	6221
FBgn0038243	369	261	292	249	173	230	111	238	184	130	188	170	120	132	157	202	205	165	226	203	226	171	193
FBgn0264904	12	12	7	13	4	9	5	16	16	5	0	2	10	5	10	11	14	7	7	13	9	7	6
FBgn0004629	8161	8908	7386	11864	4983	7801	4486	7269	5035	6345	5901	4275	3772	4945	6512	7597	6779	4982	4848	5038	5626	3774	5213
FBgn0038244	2558	1987	1533	1673	1343	1957	1269	1463	1175	743	916	1151	1212	1072	1079	1077	989	1206	1028	986	760	1192	1238
FBgn0264903	11	46	23	12	0	6	16	2	0	0	9	0	0	0	4	3	1	0	3	1	0	1	1
FBgn0020299	51	203	133	173	115	129	58	98	127	90	115	116	113	120	196	115	198	113	319	235	184	298	241
FBgn0267865	0	0	0	0	0	2	1	0	0	0	0	0	1	0	0	0	0	0	1	1	1	0	4
FBgn0038246	6	48	29	36	18	21	0	6	6	10	3	1	25	40	50	0	49	3	47	38	54	11	6
FBgn0003169	1683	1607	1348	1275	946	1312	838	1038	841	773	738	1185	918	937	924	771	996	948	1120	1000	887	1072	936
FBgn0013981	5117	4393	3331	4157	3394	3720	2568	3455	2313	1763	3441	2841	2317	2497	4444	3214	4585	2823	5042	3946	4730	3226	2901
FBgn0038248	1062	1024	657	524	950	2626	1667	2286	854	665	2549	2387	2203	2595	7947	8066	3077	6578	6945	8004	5168	11648	12583
FBgn0038247	10	0	9	10	3	2	4	10	1	5	3	2	8	5	18	9	16	9	16	18	4	7	14
FBgn0086686	2072	1678	1050	1253	944	1547	989	1290	803	625	571	877	976	1112	1350	1212	1211	1257	1044	1040	849	1347	1253
FBgn0038250	3680	3009	3045	3614	2099	2710	2806	2282	1932	1752	2570	2348	1880	1795	1614	1769	1096	1627	1925	2134	1556	1898	2084
FBgn0038251	769	550	375	490	355	684	466	604	255	164	492	460	461	404	831	862	484	717	753	729	547	771	903
FBgn0025808	396	281	195	206	206	298	217	253	151	111	182	197	152	193	240	261	183	230	223	194	172	253	249
FBgn0038252	593	437	330	310	275	619	420	544	230	112	613	426	392	435	1046	1132	435	957	987	990	650	1001	1247
FBgn0265140	985	935	719	815	640	1046	864	858	575	603	728	927	898	874	1400	1022	1411	1300	1151	1021	1096	1157	1079
FBgn0262127	534	589	545	524	422	615	415	401	404	731	348	523	438	461	374	421	527	618	536	498	469	557	461
FBgn0038256	2125	1808	2005	2151	1311	1541	1240	1139	1175	737	859	980	907	778	372	420	480	473	476	503	419	476	462
FBgn0011217	15580	14265	11632	12546	11123	12199	8939	11531	8439	5700	8628	9034	8213	7069	9443	9277	7804	8685	7265	7479	6183	10361	9359
FBgn0263929	1323	1373	988	1027	851	1634	1070	1335	817	854	1068	1647	1545	1469	2336	2491	1954	2600	2131	2186	1685	2894	2835
FBgn0038257	13877	5484	7301	9568	8187	8749	6746	10599	7311	3498	9846	3765	3610	3741	478	2437	1891	2804	431	92	1640	123	261
FBgn0038258	1	0	0	1	11	8	13	14	3	11	53	49	43	58	455	395	131	321	542	749	424	944	826
FBgn0038260	98	137	154	190	60	50	30	84	61	24	24	34	31	68	31	23	63	12	48	52	51	53	40
FBgn0038261	236	154	263	295	108	167	64	175	101	30	24	35	51	37	14	29	42	17	15	11	16	8	18
FBgn0038262	493	350	335	438	311	424	228	393	294	135	114	262	195	190	70	177	204	154	81	157	124	122	130
FBgn0266756	3139	2827	2378	3299	2111	2837	1928	2052	1860	1732	933	2212	1967	1802	1308	1181	1982	1179	1072	946	977	1105	894
FBgn0267688	0	0	0	0	0	0	1	0	0	0	0	1	0	1	12	5	3	2	7	10	10	10	10
FBgn0038266	0	3	17	1	19	30	36	30	6	18	165	72	74	87	856	384	165	271	395	532	374	693	689
FBgn0038268	278	243	206	231	186	195	173	155	148	143	139	213	157	154	138	115	143	142	168	179	133	133	107
FBgn0038269	1328	1239	916	995	910	1426	990	1150	700	548	1127	1121	1084	1126	2708	2603	1256	2003	2408	2617	1856	3550	3792
FBgn0067629	515	350	283	407	298	251	196	293	182	101	178	158	170	169	182	161	136	167	158	121	179	117	98
FBgn0067628	374	277	303	303	245	241	182	205	202	122	194	192	188	139	113	125	127	134	107	88	79	93	99
FBgn0004597	606	420	332	354	254	305	251	287	205	148	268	247	204	255	321	277	297	252	340	251	226	246	272
FBgn0038271	40879	30464	30433	34988	27790	29677	23079	26272	24358	10876	17460	12774	13422	11102	5711	7312	6255	7196	5530	5321	5421	5298	5822
FBgn0038272	1482	977	881	954	779	784	668	752	471	325	591	569	465	450	505	499	458	422	500	500	476	453	527
FBgn0038273	57	45	47	53	55	43	13	27	27	24	18	29	15	29	31	28	33	15	25	21	16	28	31
FBgn0038274	1525	1120	795	978	713	936	768	815	513	336	603	624	529	566	758	745	545	697	673	599	497	545	686
FBgn0038275	1152	780	638	714	581	484	444	423	321	189	418	276	283	223	357	320	213	233	274	223	257	225	228
FBgn0262514	4	5	5	3	19	34	16	37	6	10	70	54	39	46	286	234	85	185	279	350	226	425	419
FBgn0038277	6089	3011	1999	3062	1548	2371	1476	2072	800	321	1726	1114	1136	1202	1962	2174	790	1911	1620	1629	860	1558	2146
FBgn0028662	13086	13871	10153	13270	8901	11069	6115	15715	8412	7377	6072	6768	5059	6148	4552	5053	6142	4586	3278	3887	3629	3342	3183
FBgn0267918	0	0	0	0	0	0	0	0	0	1	0	0	2	0	0	0	0	0	0	1	1	1	0
FBgn0038279	94	106	52	81	58	55	17	27	44	33	42	24	28	79	69	52	95	37	110	52	81	71	44
FBgn0267158	0	0	0	0	0	0	0	2	0	0	3	4	1	0	22	7	3	8	8	5	3	14	8
FBgn0267159	0	2	0	0	0	2	4	2	0	2	26	15	10	14	58	71	18	27	52	51	29	65	41
FBgn0038280	15	31	36	7	72	210	108	195	59	66	349	287	232	275	1268	1208	411	931	1407	1584	1101	1985	1742
FBgn0038281	2	10	6	8	26	73	51	81	16	27	186	145	111	125	696	613	239	491	910	990	634	1139	1032
FBgn0266249	0	1	1	0	0	0	2	0	1	0	10	2	2	3	13	20	2	20	31	9	20	19	20
FBgn0038282	13	129	70	71	47	51	5	15	22	7	21	4	32	61	36	20	68	16	81	47	58	40	29
FBgn0038285	2	1	0	1	2	6	2	3	0	2	3	7	7	5	30	27	13	23	45	51	25	51	50
FBgn0038286	1166	1126	938	865	936	1098	727	785	1034	656	629	729	657	703	889	771	740	853	903	983	677	1113	931
FBgn0261859	414	386	377	338	262	433	314	304	256	223	175	308	364	346	207	235	271	280	195	154	205	223	253
FBgn0262315	0	0	0	0	0	0	0	0	0	0	0	0	0	0	0	0	0	0	0	0	0	0	0
FBgn0038290	12340	13998	15835	12671	11340	15426	14354	10046	10094	7676	10007	9153	8642	7286	1751	3427	3137	4602	1268	915	1624	1007	1265
FBgn0267160	9	12	7	6	9	22	16	7	10	3	3	8	10	4	1	10	11	8	7	1	2	1	1
FBgn0038291	18522	20794	21774	17903	16355	22912	22406	15981	17165	13893	18174	16921	15329	14268	3381	8248	7306	11410	2380	1961	3653	2449	3303
FBgn0038292	1558	393	1663	609	706	875	413	1486	940	663	338	60	88	485	51	485	528	298	48	79	225	78	18
FBgn0266064	4794	5846	7231	5833	7008	6554	4485	4211	5799	2022	2649	2441	2717	2074	718	793	1396	1039	740	480	994	586	420
FBgn0038295	2	28	23	20	15	16	5	4	7	3	5	3	12	12	8	7	27	5	12	8	9	7	12
FBgn0038294	1318	1986	8872	6851	1023	2905	472	1772	2451	770	303	1539	460	699	794	361	971	601	114	174	2050	206	38
FBgn0038296	745	661	476	432	481	953	615	846	338	262	647	862	860	903	2669	2683	1071	2170	2590	2963	1917	3995	3968
FBgn0263633	0	0	0	0	0	0	0	0	0	0	0	0	0	0	0	0	0	0	0	0	0	0	0
FBgn0260659	1837	1681	1922	1685	1062	1679	1450	1546	920	1108	1210	1319	1323	992	833	883	1156	877	1071	1095	819	1037	725
FBgn0028984	576	679	1301	1593	523	451	303	571	448	292	303	375	320	305	407	258	515	272	460	251	462	225	147
FBgn0038299	5877	6333	6905	6170	4954	6863	7353	5146	5232	4660	6467	5872	5020	4441	1932	2977	2168	3627	1988	2125	2009	1882	1933
FBgn0038300	432	315	258	360	272	281	200	253	189	150	209	156	177	155	171	123	213	141	213	116	129	106	156
FBgn0038301	397	328	228	289	185	257	166	241	119	71	146	162	108	149	171	158	150	179	237	175	153	141	176
FBgn0038302	733	455	518	469	487	367	301	333	371	174	361	280	189	175	189	208	157	170	252	238	280	170	183
FBgn0038303	951	612	453	604	399	603	406	486	280	258	346	393	384	334	393	414	428	399	417	372	297	392	390
FBgn0038304	1136	872	685	927	643	978	675	810	572	507	565	722	699	666	839	928	682	916	829	835	583	1019	1016
FBgn0283562	0	0	0	0	0	0	0	0	0	0	0	0	0	0	0	0	0	0	0	0	0	0	0
FBgn0051155	605	542	412	516	410	450	325	322	269	205	369	353	332	269	338	335	320	318	355	281	342	272	265
FBgn0051344	243	214	227	1034	144	181	128	172	107	97	183	206	119	177	432	341	281	238	454	591	307	478	403
FBgn0263979	3423	3109	2211	2716	2061	2339	1624	1863	1196	1073	1805	1852	1627	1607	2213	1743	2397	1881	1681	1393	1703	1521	1514
FBgn0038306	2172	1534	1282	1291	1183	1134	969	966	713	403	766	723	697	583	685	734	513	666	679	589	544	603	661
FBgn0038307	1914	1247	1171	1369	1110	897	713	904	706	331	601	427	403	371	501	421	303	406	431	461	439	524	513
FBgn0085345	1148	115	177	186	26	30	470	778	351	98	193	17	8	27	26	24	15	20	35	29	24	36	29
FBgn0263448	16	7	0	3	11	8	9	14	4	1	23	14	13	17	91	66	25	58	75	98	79	138	106
FBgn0045035	1335	1311	1031	842	1003	1549	876	775	1038	364	422	609	657	639	769	693	611	742	548	511	425	886	830
FBgn0266599	101462	91675	77934	79233	66122	79707	49629	55524	60349	32641	44777	41571	42178	36814	34808	39137	38127	35563	38681	37466	29824	42222	43171
FBgn0038309	0	3	0	2	1	2	0	1	1	0	0	0	5	2	3	0	2	2	0	0	0	0	2
FBgn0259823	218	199	128	189	53	123	38	47	45	35	34	37	53	114	106	56	138	59	133	97	85	80	71
FBgn0263740	7534	6208	5715	6008	5514	5170	4081	4459	3799	2663	3930	3938	3719	2735	2494	2516	2931	2770	2233	1857	2353	1939	1907
FBgn0263755	282	264	166	212	155	230	185	183	141	106	128	142	132	198	284	249	217	242	262	211	241	222	234
FBgn0014879	3532	3270	2475	3082	2622	2516	1762	1851	1446	1062	1730	1758	1530	1484	1783	1261	2244	1370	1832	1267	1905	1201	1106
FBgn0016691	23049	16810	16732	17568	17300	16259	11311	14719	14407	6253	11962	8470	8212	6748	3533	4606	4361	4560	3037	2475	3779	2369	2765
FBgn0038311	42	44	30	31	29	101	57	104	44	34	166	99	132	109	560	432	198	393	538	482	404	554	602
FBgn0038312	1016	933	1167	1042	793	678	764	738	506	808	1308	1270	712	701	2982	1673	2446	2012	2328	1548	1772	1358	1348
FBgn0000283	3184	3196	2279	2623	2142	2754	1718	1980	1332	1295	1245	1981	1952	1915	2082	1715	2324	1965	2067	1510	1706	1768	1646
FBgn0038313	1168	800	647	762	577	716	527	608	492	221	626	447	462	400	583	555	388	534	506	527	497	484	581
FBgn0267750	0	2	0	2	0	0	0	0	0	0	2	3	0	1	2	4	3	2	6	3	3	2	7
FBgn0027378	692	633	458	611	558	550	455	544	347	252	399	413	366	311	431	355	404	415	395	362	372	352	311
FBgn0011476	508	344	345	396	291	328	196	354	202	129	273	169	188	155	211	240	174	222	205	216	191	182	223
FBgn0003721	7658	8069	18853	15977	6973	8653	4172	6968	7053	4170	3815	7125	3818	4182	4684	3960	8005	5029	3078	2534	6726	2435	1730
FBgn0266745	7	6	1	10	3	8	2	9	4	2	2	5	3	6	1	3	6	2	5	8	8	2	1
FBgn0004117	3075	3678	14938	13181	2475	4783	1065	3150	3748	1241	725	2067	588	989	1308	643	1603	794	79	206	2834	254	43
FBgn0038315	30	13	178	678	18	4	2	1	1	1	0	2	2	0	0	0	0	2	0	0	0	0	0
FBgn0038316	585	585	415	438	407	580	435	564	347	279	583	435	425	390	619	615	398	512	629	556	437	582	635
FBgn0264832	364	4128	2705	4574	2502	6233	5625	1516	2939	2848	7990	4600	5533	1391	172	220	347	175	66	16	485	58	28
FBgn0026441	898	986	620	687	544	1048	668	758	468	419	680	867	884	799	1532	1639	903	1366	1276	1289	968	1918	2124
FBgn0038318	1585	1156	800	819	586	865	742	592	352	534	623	639	600	642	473	449	647	545	532	453	556	539	527
FBgn0000533	99	149	88	342	70	100	14	220	137	71	30	54	23	49	80	48	91	32	10	34	64	6	4
FBgn0038319	2480	1669	1481	1653	1436	1258	910	1203	1041	428	971	665	624	479	441	504	468	493	454	306	353	361	405
FBgn0013269	9596	6740	5268	6263	5075	4749	3476	3282	3154	1733	3271	2807	2963	2183	2346	2188	2256	2150	2209	1604	2179	1503	1647
FBgn0038320	3051	2349	1853	1912	1462	2060	1296	1612	1031	925	930	1426	1409	1412	1372	1220	1598	1367	1499	1185	1091	1392	1253
FBgn0038321	252	330	334	364	222	228	129	271	188	125	283	215	233	281	632	636	465	517	803	918	742	914	976
FBgn0021750	1004	671	662	646	525	558	465	505	383	198	339	332	284	300	357	275	209	254	244	241	232	236	260
FBgn0019925	10231	10870	12094	11787	9326	12463	12163	9651	8248	9998	12690	13542	11047	9457	6116	7313	9344	9235	5646	4772	6618	4705	4169
FBgn0051301	2441	1773	1391	1680	1237	1488	1034	1295	827	547	1025	1017	976	919	1264	1161	939	1047	1160	950	992	922	1015
FBgn0261679	0	0	0	0	0	0	0	0	0	0	0	0	0	0	0	0	0	0	0	0	0	0	0
FBgn0261680	0	0	0	0	0	0	0	0	0	0	0	0	0	0	0	0	0	0	0	0	0	0	0
FBgn0266722	273	176	174	179	166	138	120	146	86	66	146	91	75	86	125	103	79	101	154	138	122	113	122
FBgn0038324	147	131	117	131	83	104	89	91	67	59	67	107	137	88	125	78	100	97	103	103	98	91	85
FBgn0038325	809	1007	644	874	653	995	1120	712	525	818	747	1442	1094	687	429	502	831	582	321	325	412	348	335
FBgn0038326	5500	6129	6378	5568	6911	8408	6140	7042	6331	3468	4031	3953	4019	3331	1458	1564	2216	1793	893	1049	1137	856	811
FBgn0026634	1031	799	757	853	676	908	662	789	462	351	709	748	610	543	991	965	803	989	886	747	700	829	822
FBgn0038327	948	702	569	712	553	625	479	569	365	259	634	503	413	419	743	669	628	579	658	626	612	537	512
FBgn0026737	714	523	361	509	368	496	366	488	206	166	433	386	316	313	480	548	326	526	545	555	492	488	574
FBgn0085433	407	359	302	294	191	298	160	200	171	120	163	203	182	209	267	188	307	169	304	197	216	244	214
FBgn0038330	417	282	202	217	208	385	214	291	131	104	318	298	202	237	695	746	351	582	700	688	496	829	928
FBgn0038332	201	148	100	138	115	173	107	158	63	59	205	140	139	143	421	354	173	331	439	443	317	535	502
FBgn0038331	1506	1133	814	975	801	1048	742	1156	635	480	952	902	761	733	1202	1350	870	1134	1153	1182	1061	1137	1089
FBgn0262483	181	510	322	343	166	221	51	88	110	50	51	28	88	169	103	41	227	63	130	98	74	66	93
FBgn0038334	36	69	41	20	90	256	185	255	88	79	402	286	255	293	1051	1150	375	831	1228	1371	983	1504	1727
FBgn0038337	3960	2170	3836	3579	1359	2141	1473	1226	1253	1540	667	939	924	768	329	468	615	367	175	370	319	140	215
FBgn0267725	10	7	12	7	0	2	6	5	2	6	3	6	3	3	2	5	0	3	2	1	1	1	0
FBgn0041188	4085	3120	1876	2592	1635	2662	1747	2290	1234	840	1356	1790	1715	1810	2488	2520	1698	2412	1820	1905	1381	2704	2869
FBgn0267571	0	2	0	2	2	0	0	0	1	3	0	0	2	0	0	0	4	0	2	0	1	0	1
FBgn0262367	0	0	0	0	0	0	0	0	0	0	0	0	0	0	0	0	0	0	0	0	0	0	0
FBgn0262429	0	0	0	0	0	0	0	0	0	0	0	0	0	0	0	0	0	0	0	0	0	0	0
FBgn0262397	0	0	0	0	0	0	0	0	0	0	0	0	0	0	0	0	0	0	0	0	0	0	0
FBgn0038339	116	10	30	1188	1	15	4	25	4	10	7	14	5	27	37	42	31	29	45	25	24	75	82
FBgn0000047	2	0	0	0	1	4	0	1	0	0	1	4	0	0	8	4	2	2	1	3	3	6	2
FBgn0286071	1503	1694	1598	1428	1174	1594	1285	1332	1191	1063	851	1497	1249	919	870	627	1066	969	932	767	840	1239	736
FBgn0286736	0	0	1	0	0	0	3	2	2	0	0	0	0	0	0	0	1	0	0	0	0	0	0
FBgn0038342	403	266	203	217	198	522	352	561	154	93	483	368	382	402	908	1024	334	897	936	887	645	971	1140
FBgn0019940	17	9	2	3	6	2	3	1	0	0	2	1	1	1	3	10	0	3	2	7	4	2	1
FBgn0038343	2	28	10	25	17	8	2	4	0	5	19	5	2	19	20	4	17	3	18	17	35	11	13
FBgn0038344	1455	1109	991	1080	953	1338	951	1017	771	795	769	1285	1072	924	745	727	735	987	762	651	680	1039	824
FBgn0038345	246	205	138	119	135	391	255	414	123	120	505	395	308	319	1167	1129	409	898	1195	1275	912	1270	1381
FBgn0264776	2497	1723	3177	2549	1453	1908	1496	1770	1819	846	1143	881	857	1109	236	606	399	622	261	270	337	238	221
FBgn0264775	472	286	66	27	347	235	6	658	233	103	5	1	0	74	26	34	19	31	0	17	3	0	2
FBgn0051296	7	12	2	3	2	9	2	4	4	0	0	2	6	3	4	4	3	1	2	7	3	5	4
FBgn0267408	14422	8563	8616	8685	5736	6478	4362	7606	5735	2612	3544	3257	2676	2533	1272	2373	1989	1957	1552	2305	2150	1934	2266
FBgn0038348	4	34	37	26	11	22	16	11	18	3	12	37	7	6	57	47	26	33	17	18	213	42	32
FBgn0038349	1931	1566	1635	2167	1436	2127	1222	1712	1242	736	893	1252	1084	1188	1114	1845	1373	1593	1557	1784	1487	1915	2091
FBgn0038350	5	0	6	2	2	3	5	3	9	4	6	12	5	5	12	13	12	16	15	12	6	22	13
FBgn0263040	2	0	0	0	0	2	0	0	0	0	0	0	0	0	1	0	0	0	3	14	5	6	5
FBgn0263041	0	0	0	0	0	0	0	2	0	0	0	0	0	0	0	0	0	1	4	5	3	7	5
FBgn0053207	64	189	103	128	53	70	53	65	38	40	31	42	78	148	105	51	99	43	134	67	98	115	66
FBgn0264431	0	0	0	0	6	13	5	13	4	5	20	13	16	14	80	65	28	45	66	91	55	108	100
FBgn0051446	265	18	3	5	30	2	66	921	22	2	4	3	1	0	2	0	1	0	0	1	0	2	1
FBgn0038353	11532	2341	1016	5030	2214	2764	2852	5619	557	2182	3271	837	928	1405	234	766	1880	374	500	759	384	876	155
FBgn0267195	2	1	0	3	0	1	6	2	5	2	0	0	0	1	0	0	0	0	0	1	1	0	0
FBgn0267196	0	0	0	0	0	0	0	0	0	0	1	0	0	1	5	3	0	2	2	0	1	6	3
FBgn0038354	36	106	113	353	106	68	39	71	56	29	33	31	17	41	26	30	52	27	18	49	37	22	36
FBgn0051294	5	0	4	0	18	63	36	67	18	47	204	147	102	159	756	775	255	585	1065	1204	843	1352	1068
FBgn0085303	1	10	6	4	29	78	59	99	22	41	177	104	108	136	486	437	183	413	476	588	429	603	591
FBgn0038355	10	25	25	2	86	175	113	235	79	80	348	294	241	290	1178	1126	414	862	1142	1393	952	1833	1694
FBgn0038356	0	0	0	0	0	4	8	11	3	6	38	24	12	22	205	136	59	105	242	337	186	337	247
FBgn0038357	1	8	21	2	24	83	57	72	21	31	157	124	94	125	448	494	174	392	557	639	434	724	723
FBgn0266733	0	3	11	15	0	0	0	0	0	0	0	0	0	0	0	0	0	0	0	0	0	0	0
FBgn0038358	2	3	16	6	1	5	6	5	4	0	8	7	4	2	20	5	1	5	6	6	3	14	11
FBgn0266734	0	2	162	193	4	2	0	0	0	0	0	10	0	0	7	4	0	0	0	0	13	2	0
FBgn0038359	11	62	46	15	130	330	233	306	102	132	709	535	455	497	2816	2566	926	1957	3051	3689	2434	4359	4028
FBgn0038360	1478	1139	1095	1223	1294	1376	1080	1237	861	799	1563	1338	1108	1028	1488	1533	1406	1552	1418	1199	1392	1199	1407
FBgn0038361	5	1	4	7	2	12	11	4	7	6	54	32	25	39	321	247	113	169	467	531	322	598	600
FBgn0000246	228	147	132	117	100	181	120	124	71	80	124	131	105	140	209	242	194	215	208	176	122	252	245
FBgn0038363	459	305	330	381	349	387	300	419	189	183	445	332	311	322	575	666	457	612	708	698	654	756	716
FBgn0262527	2400	2285	1578	1853	1279	1836	1306	1396	1095	852	906	1161	1250	1156	1276	1044	1308	1061	1156	982	895	1235	1137
FBgn0038365	12	20	29	18	10	14	4	10	16	7	4	7	7	8	7	14	13	7	11	15	29	7	6
FBgn0267551	12	12	9	9	4	13	11	20	2	4	4	3	6	11	9	3	9	11	15	4	4	11	18
FBgn0026616	136	357	164	245	106	186	107	127	104	134	40	80	143	206	112	43	219	37	163	59	119	66	54
FBgn0266738	0	0	0	0	0	0	0	0	1	0	0	0	0	0	0	0	0	0	0	0	0	0	0
FBgn0003227	330	154	65	104	61	95	46	55	23	20	21	42	30	58	100	53	69	44	46	44	39	46	59
FBgn0038366	4	17	0	4	2	15	0	4	7	0	2	29	4	2	73	31	26	12	10	35	140	15	4
FBgn0263023	159	136	103	93	122	277	204	355	113	70	422	267	242	307	757	853	287	648	713	682	539	742	753
FBgn0263022	41	48	29	21	55	147	111	176	51	45	213	162	141	183	551	574	223	410	454	540	315	657	666
FBgn0038369	1067	751	744	833	618	590	552	709	397	331	668	516	488	436	596	587	531	538	631	540	553	585	479
FBgn0017567	5792	3772	3596	4080	3859	3533	2476	3526	3047	1232	2472	1718	1668	1352	1156	1316	1146	1121	1008	910	1020	912	1018
FBgn0263525	0	0	0	0	0	0	0	0	0	0	0	0	0	0	0	0	0	0	0	0	0	0	0
FBgn0003483	1022	564	358	472	376	680	362	405	269	146	236	373	332	361	509	576	224	510	409	392	233	566	614
FBgn0038371	136	109	78	78	74	75	75	75	60	37	89	73	45	51	68	39	76	40	49	40	55	40	43
FBgn0265048	10828	12683	12219	11129	8582	14120	10763	6642	9977	5982	5348	5777	7442	5408	1858	1919	2173	2917	2398	2747	2150	4354	3258
FBgn0038373	175	277	274	122	471	1097	762	1222	374	430	1800	1489	1261	1488	5857	5479	1957	4170	6071	6870	4579	8512	8548
FBgn0038376	3658	2794	2696	2690	1920	2671	1972	2294	1662	1100	1406	1721	1416	1543	1815	1864	1227	1696	1638	1609	1224	1722	1904
FBgn0051183	73	34	37	39	29	66	57	76	58	59	170	268	63	95	674	233	451	410	304	210	339	275	344
FBgn0038377	15	31	29	11	40	153	112	176	49	59	327	206	177	245	1112	898	360	679	941	1085	703	1319	1351
FBgn0038380	5	1	2	6	2	6	4	12	8	2	2	1	3	6	0	4	6	0	4	10	1	7	4
FBgn0027657	11541	9071	8712	8739	10467	8590	7592	7695	8700	4264	7105	6515	5977	4225	708	2265	1471	2040	1620	462	1636	391	502
FBgn0051292	0	0	0	4	1	0	1	2	0	0	0	1	0	0	0	0	0	0	0	0	0	0	0
FBgn0038381	435	424	424	582	310	392	254	359	247	196	229	281	252	220	182	172	285	143	216	114	212	122	74
FBgn0266566	2	2	18	10	0	1	0	2	2	0	0	0	4	2	11	5	8	4	17	7	10	4	9
FBgn0038385	8	35	18	31	12	19	10	14	19	18	11	10	11	43	54	11	70	11	82	24	39	33	1
FBgn0267692	1	0	0	0	0	0	0	1	0	0	1	1	1	1	17	26	13	14	44	36	26	61	58
FBgn0085305	0	63	61	795	61	134	84	20	37	65	176	81	154	47	947	124	65	35	1008	576	404	710	119
FBgn0038386	0	0	0	0	0	3	0	0	0	0	5	2	2	1	93	61	19	32	133	136	83	210	166
FBgn0038387	1378	953	941	867	831	840	647	744	615	294	617	419	444	386	521	531	341	450	502	522	440	536	515
FBgn0013334	2238	3016	2013	2511	1512	2143	1138	1375	1116	1035	1257	1529	1493	1623	1750	1633	2196	1714	1772	1481	1560	1729	1585
FBgn0051088	0	0	0	0	0	0	0	0	0	0	0	0	0	0	0	0	0	0	0	0	0	0	0
FBgn0286741	0	0	0	0	0	0	0	0	0	0	0	0	0	0	0	0	0	0	0	0	0	0	0
FBgn0038388	975	807	926	853	821	1051	843	963	697	695	949	1088	825	864	1283	1337	917	1306	1430	1507	1156	1433	1473
FBgn0038389	680	507	391	440	394	511	355	467	270	170	475	391	335	312	601	628	389	553	614	542	452	561	591
FBgn0052856	293	260	207	238	184	184	146	189	123	71	191	147	123	146	175	154	136	142	166	148	146	158	135
FBgn0038390	154	134	71	88	64	97	67	52	26	33	50	70	50	67	81	52	115	55	75	53	75	53	46
FBgn0002783	2606	2524	1593	2195	1505	2016	1455	1440	1096	996	1221	1402	1434	1363	1648	1130	2103	1246	1471	960	1062	1176	1206
FBgn0022787	2326	2022	1538	1760	1266	1976	1293	1299	987	867	1201	1861	1632	1493	2381	2014	2032	1982	2202	2122	1572	2922	2577
FBgn0003507	1448	2126	1790	1379	1642	1803	2246	2036	2005	1916	1071	1579	1677	1279	771	957	928	1088	1413	1799	1254	2295	1443
FBgn0264982	4	4	6	2	2	2	0	1	2	3	0	2	0	1	3	3	1	2	1	9	5	4	5
FBgn0262028	50	35	37	38	33	65	30	113	20	39	11	23	17	16	2	20	18	10	5	19	12	16	4
FBgn0038391	875	399	762	559	411	467	282	785	366	272	198	176	126	161	31	159	155	98	81	104	73	94	81
FBgn0003117	69	134	33	74	35	73	84	94	39	89	22	57	124	83	73	41	74	90	153	107	135	159	114
FBgn0038394	0	38	38	22	7	3	0	0	2	2	4	5	2	1	3	8	3	5	8	12	9	7	16
FBgn0038395	148	99	88	59	53	58	65	71	48	29	70	49	50	56	95	72	75	55	85	84	80	53	92
FBgn0024222	546	440	380	448	449	428	310	388	260	196	310	402	380	304	372	346	303	348	319	291	271	377	350
FBgn0266739	1	0	0	0	2	0	1	0	2	1	0	0	1	0	0	0	0	0	2	0	1	3	0
FBgn0038396	274	199	194	245	147	214	171	190	121	93	211	152	173	135	199	163	183	184	244	208	203	182	193
FBgn0027948	3789	2976	1880	2528	1669	2972	1703	2011	1174	1058	1021	1922	1964	2239	3286	2942	2449	2765	2781	2530	2023	4046	3912
FBgn0038397	3	2	5	2	5	23	8	9	4	2	23	30	24	22	71	80	37	59	79	93	44	148	148
FBgn0026059	2187	1664	1486	1856	1025	1540	902	1097	837	579	504	851	837	881	1137	1015	1049	1067	1384	1373	1140	1890	1436
FBgn0052855	35	0	18	140	0	0	1	1	3	0	0	0	0	0	1	0	0	0	0	1	0	0	0
FBgn0038398	0	3	3	5	5	35	34	35	8	10	50	34	26	48	96	130	44	88	80	122	81	118	92
FBgn0010379	2740	2402	1635	2017	1508	2074	1360	1562	1032	923	1106	1602	1414	1451	1780	1680	1919	1741	2137	1806	1542	2205	1752
FBgn0003319	7	11	112	62	4	9	2	3	0	3	2	1	0	10	39	13	14	8	41	3	28	8	7
FBgn0038400	9439	6894	7056	7326	6798	6690	5125	6566	5824	3036	4831	4164	3747	2994	1930	2431	2270	2348	1630	1682	2020	1547	1679
FBgn0038401	477	413	430	409	314	386	235	403	259	152	204	238	254	233	280	308	241	288	289	244	216	321	306
FBgn0038402	3	61	7	18	33	13	0	1	5	11	12	0	11	40	34	1	74	3	61	28	31	14	15
FBgn0063649	92	234	203	245	151	185	114	186	136	115	82	137	158	118	21	26	68	41	46	24	36	33	33
FBgn0263449	0	0	0	0	0	0	0	0	0	0	0	0	0	0	1	0	1	0	0	1	0	0	6
FBgn0038404	389	76	43	190	47	116	52	127	34	66	99	32	60	47	46	78	46	56	55	36	34	49	52
FBgn0038405	37	629	2259	752	226	284	135	339	439	99	200	321	176	152	212	274	184	236	246	254	307	285	335
FBgn0024491	990	746	570	666	513	503	364	500	343	219	408	323	291	269	408	301	381	280	345	316	336	215	222
FBgn0086370	1288	986	776	865	599	1062	639	964	486	361	697	659	687	661	1267	1463	725	1164	1225	1383	901	1673	1562
FBgn0038407	7526	5820	6399	5419	5075	6530	5064	5011	4217	2833	3594	4310	3303	3105	1037	2143	1539	1870	536	775	1034	622	814
FBgn0051287	125	164	104	70	164	363	253	425	117	99	544	388	347	473	1384	1385	518	1168	1455	1655	1100	2082	1918
FBgn0010438	1743	1350	1229	1295	1053	850	666	785	741	290	545	454	465	382	229	205	338	209	204	153	312	134	138
FBgn0267199	0	2	3	2	0	1	1	2	1	0	1	1	5	1	11	3	8	4	4	5	5	5	3
FBgn0267200	4	0	1	1	1	1	0	1	1	1	2	3	2	1	2	0	7	1	1	2	5	2	0
FBgn0267198	0	0	0	0	0	0	0	1	0	0	0	0	0	0	0	0	0	0	0	0	0	1	0
FBgn0267197	0	0	0	0	0	0	0	0	0	0	0	0	0	0	0	0	0	0	0	0	0	0	0
FBgn0267202	0	2	0	0	1	0	0	1	0	0	0	0	0	0	0	0	0	0	0	0	0	0	0
FBgn0267201	1	1	0	1	2	0	1	1	1	0	0	0	0	0	0	1	2	0	2	0	4	0	1
FBgn0267203	1	0	0	1	2	0	0	0	3	0	0	2	0	0	0	1	3	0	1	1	0	1	0
FBgn0040071	391	588	460	512	410	439	275	393	202	317	304	434	483	522	441	191	756	349	506	321	396	385	230
FBgn0040237	11291	7977	7464	6677	5612	6342	4181	4549	4878	1611	2764	2643	2862	2323	3528	3278	1545	2927	2864	3000	2193	3971	4232
FBgn0020407	335	310	214	258	164	201	179	231	164	110	162	220	198	181	182	205	226	217	195	213	201	230	236
FBgn0020399	55	59	57	44	97	268	151	274	75	59	325	315	293	364	1073	1095	430	770	1215	1397	915	1682	1632
FBgn0261286	2184	1502	1277	1386	1005	1094	736	652	605	392	434	496	539	415	353	375	388	322	360	260	282	346	367
FBgn0250823	5033	4457	3414	3503	3333	5182	3152	4401	2626	1938	2897	3451	3319	3434	6296	6589	3486	5460	6178	6831	4718	8557	7151
FBgn0038412	344	248	674	329	202	196	112	292	178	235	281	173	79	110	261	227	175	189	186	199	217	133	187
FBgn0040271	577	532	442	499	276	284	153	161	159	139	107	113	170	201	258	140	254	155	233	215	173	227	189
FBgn0011858	0	0	0	1	0	0	0	0	0	0	0	0	0	0	0	0	0	0	0	0	0	0	0
FBgn0012011	0	0	0	0	0	0	0	0	0	0	0	0	0	0	0	0	0	0	0	0	0	0	0
FBgn0264836	2	0	0	0	0	0	0	0	0	0	3	0	0	0	12	5	1	1	4	9	4	2	1
FBgn0038414	203	21	5	5	4	4	109	260	5	2	9	5	1	1	0	0	5	0	0	1	1	3	1
FBgn0038415	0	0	1	0	0	0	0	0	0	0	0	0	0	2	0	0	0	0	0	0	1	0	0
FBgn0038416	140	18	3	7	22	7	233	409	12	3	6	4	4	7	0	3	2	0	4	10	3	4	3
FBgn0283477	4191	4001	2691	2869	2939	3412	2434	3151	2103	1471	2395	2598	2400	2436	2938	2522	2819	2324	2813	2477	2603	2617	1755
FBgn0038418	203	185	109	143	106	153	159	148	47	92	98	137	159	156	239	225	170	210	212	183	182	301	253
FBgn0038419	245	268	301	186	201	298	301	247	441	161	134	87	43	88	47	134	185	105	40	58	72	52	22
FBgn0027095	9619	8122	8724	10393	6465	8578	9006	7195	5477	6794	10841	9005	7351	6588	5423	6596	6601	7087	3817	2989	4354	2982	3603
FBgn0038420	1669	1486	1356	1144	1510	1754	1754	1390	1374	1210	1703	1809	1198	1209	1507	1267	1136	1347	1195	1647	1355	1309	1134
FBgn0038421	58	66	48	52	71	81	52	86	40	40	63	58	70	50	93	98	81	99	101	131	97	142	65
FBgn0259917	0	3	1	0	7	13	19	33	13	9	38	47	38	35	231	194	68	147	299	351	224	380	316
FBgn0038422	24	66	72	171	29	31	18	22	15	14	42	22	33	25	83	97	47	71	74	94	74	145	161
FBgn0038423	0	0	5	0	17	46	31	48	18	27	211	135	111	134	1030	860	320	622	1040	1228	878	1583	1611
FBgn0266703	0	2	1	1	5	17	7	26	8	13	34	21	19	22	49	92	35	72	63	72	48	88	121
FBgn0003513	6	17	2	1	2	3	5	2	1	3	10	4	4	21	36	20	15	8	10	9	16	30	16
FBgn0267190	0	1	0	0	0	1	0	0	0	0	5	1	5	4	39	12	3	8	24	36	32	38	36
FBgn0051497	0	0	0	0	0	0	0	0	0	0	0	0	0	0	0	0	0	0	0	0	0	0	0
FBgn0267191	0	0	0	0	0	0	1	1	0	0	0	0	0	1	2	1	0	3	1	1	0	2	0
FBgn0051279	92	58	55	53	65	190	136	170	60	52	193	175	157	172	579	534	198	376	441	534	295	558	528
FBgn0051282	0	0	0	0	0	0	0	1	0	0	0	0	0	0	0	0	1	0	2	1	0	0	0
FBgn0038424	1570	1109	990	1056	798	965	773	906	520	432	851	666	577	603	816	854	573	831	875	835	683	931	940
FBgn0038425	513	349	309	402	270	293	172	287	160	117	182	134	142	151	148	139	113	113	123	109	125	134	113
FBgn0038426	1835	1122	1114	1236	975	1036	633	929	739	260	673	405	432	368	364	401	293	390	405	399	392	417	417
FBgn0038427	2573	1647	1251	1468	978	1481	1019	1301	777	546	811	968	848	907	1186	1240	806	1109	926	921	770	1064	1211
FBgn0038428	2001	1515	1256	1392	1193	1430	1085	1309	840	658	1346	1196	1103	938	1400	1536	917	1366	1404	1272	1155	1478	1410
FBgn0038429	791	573	527	525	474	427	383	391	318	240	321	395	334	235	291	302	191	295	251	302	300	255	292
FBgn0044826	2184	1902	1620	1478	1250	1870	1005	1619	1372	981	647	1251	1114	1228	1100	1275	1115	1213	1329	1285	1035	1439	1017
FBgn0038431	1973	416	249	809	223	374	18	280	11	209	459	34	78	4	8	130	255	19	93	26	7	23	17
FBgn0038432	531	507	421	484	284	469	239	414	293	210	224	311	302	284	245	242	383	238	222	200	291	196	137
FBgn0250754	3449	2862	1589	2214	1543	3221	1718	1892	1191	1046	1215	2159	2116	2490	4858	4588	2622	4010	4118	4034	2927	6228	6506
FBgn0027053	2386	1664	1327	1551	1272	1515	1163	1337	852	527	1288	1004	901	842	1332	1309	940	1196	1184	997	1039	1068	1292
FBgn0038435	127	38	41	15	23	5	15	3	3	1	2	1	2	7	17	1	18	1	12	7	6	13	6
FBgn0267693	2	9	5	5	1	4	7	2	5	1	1	0	1	4	1	4	3	5	5	0	1	1	1
FBgn0038436	27	75	45	56	22	18	5	10	6	6	8	2	6	24	13	6	22	3	8	4	8	7	5
FBgn0004087	790	627	554	606	572	489	369	459	378	292	453	382	250	247	248	205	312	203	266	220	305	177	175
FBgn0038437	623	371	319	406	309	388	223	367	222	119	278	179	166	162	232	285	186	263	270	240	209	232	285
FBgn0038438	2521	1857	1883	2008	1466	1884	1987	1750	1283	1416	2266	2006	1739	1646	2057	2056	1786	2025	1814	1558	1508	1858	1843
FBgn0038439	1	0	97	132	0	0	1	0	0	0	3	0	1	1	6	2	2	10	7	8	5	10	6
FBgn0038440	2	3	0	0	2	3	0	0	0	0	0	2	0	0	0	0	0	4	0	0	0	1	2
FBgn0028381	1867	863	1098	756	957	759	517	1471	668	627	1101	867	437	560	721	1081	810	889	871	967	902	834	1021
FBgn0259244	543	895	464	481	352	467	206	191	217	245	222	193	263	540	385	209	619	216	488	297	340	273	150
FBgn0267694	0	0	0	0	0	3	0	0	0	0	1	2	2	3	7	6	5	11	14	15	9	13	8
FBgn0038445	66	59	44	23	93	259	146	261	76	80	316	282	246	294	1039	1063	385	744	1030	1223	771	1421	1446
FBgn0038446	478	362	332	358	296	306	214	332	191	111	300	240	222	168	249	252	186	204	234	239	225	225	207
FBgn0020907	15878	8894	10658	10453	10744	11331	9365	9144	7257	8741	5386	11032	9166	6492	839	2415	1503	1837	980	1114	1588	1035	931
FBgn0038447	3	0	3	1	0	5	0	1	1	1	0	3	1	3	1	2	2	2	2	3	1	2	2
FBgn0027562	5	9	42	4	41	20	14	27	5	11	33	17	22	19	91	58	32	40	56	92	69	90	103
FBgn0027109	2	29	31	53	26	5	2	21	0	15	17	2	11	23	24	0	62	9	41	9	36	3	0
FBgn0038448	0	1	2	0	1	6	6	2	2	5	26	27	27	18	140	108	45	94	167	229	128	259	243
FBgn0022344	3951	2598	2220	2453	2119	2408	1632	2054	1780	663	1577	1149	1144	1006	1206	1358	751	1204	1045	1014	898	1017	1208
FBgn0038449	2	16	13	11	4	36	5	18	8	10	35	13	21	14	82	80	25	38	70	64	68	121	105
FBgn0038450	0	35	41	57	5	52	2	0	4	0	23	0	0	0	0	0	0	0	0	0	5	0	0
FBgn0262233	0	0	0	0	0	0	0	0	0	0	0	0	0	0	0	0	0	0	0	0	0	0	0
FBgn0038451	1	52	9	4	1	111	0	0	6	0	23	1	0	0	11	8	0	0	0	0	1	1	0
FBgn0038452	22	7	4	12	12	7	6	4	8	8	4	9	7	5	13	24	7	16	12	31	15	24	33
FBgn0285925	823	2024	1146	1556	859	1295	765	597	737	980	877	1530	1505	1625	1458	932	2743	1378	1524	830	1258	815	581
FBgn0015520	4705	2830	1695	2071	1599	2919	1651	2427	995	422	1301	1533	1422	1611	2414	2689	1206	2346	1606	1660	1079	2187	2345
FBgn0038453	1880	1506	954	1267	853	1322	808	1204	524	425	1024	975	833	1065	2087	1895	1333	1612	2186	2037	1698	2224	2206
FBgn0038454	237	212	166	255	161	262	150	203	128	68	150	157	136	120	213	196	198	158	129	144	140	133	152
FBgn0015019	9340	6652	5685	6687	4332	5262	3645	4246	3243	1997	3312	3148	3237	2847	3185	3145	2678	2843	2475	2126	2016	2512	3018
FBgn0015351	288	176	176	146	125	154	98	142	73	55	115	125	79	88	120	100	87	131	132	93	87	87	106
FBgn0038455	292	204	267	215	192	190	142	223	181	128	161	179	108	121	111	120	140	126	161	144	146	84	124
FBgn0051217	939	985	1097	1266	665	811	677	498	633	466	520	595	468	486	512	405	399	521	812	682	420	1094	703
FBgn0003944	83	139	171	88	161	207	113	115	189	141	115	216	172	158	58	59	82	110	99	66	112	187	38
FBgn0020556	3	14	7	2	17	34	17	23	15	9	19	40	31	36	58	83	39	75	139	142	57	136	154
FBgn0063261	22	24	25	10	21	104	66	98	26	22	203	114	87	122	826	693	221	440	931	1019	716	1234	1003
FBgn0266250	0	0	0	0	0	0	0	0	0	1	0	0	0	0	0	0	0	0	0	0	0	0	0
FBgn0015230	0	0	0	0	0	0	4	2	0	7	21	17	13	20	281	203	105	141	341	431	248	533	486
FBgn0267314	0	0	0	1	0	0	0	0	0	0	0	0	0	0	1	0	0	1	0	0	5	0	0
FBgn0267315	0	0	0	1	1	1	1	3	0	0	3	2	4	0	11	14	3	14	17	15	14	36	26
FBgn0000014	814	946	1041	867	951	994	929	913	1128	519	548	936	692	742	669	692	462	602	922	1114	807	1254	796
FBgn0264857	11	16	27	33	17	13	16	19	26	8	26	9	10	6	33	28	14	37	46	50	55	54	58
FBgn0020546	5	8	12	5	2	12	6	7	4	7	1	4	5	10	9	4	3	9	11	7	13	20	9
FBgn0262462	0	0	0	0	0	0	0	0	0	0	0	0	0	0	0	0	0	0	0	0	0	0	0
FBgn0262290	0	0	0	0	0	0	0	0	0	0	0	0	0	0	0	0	0	0	0	0	0	0	0
FBgn0263595	0	0	0	2	0	0	0	1	0	0	0	0	0	0	0	0	0	0	0	0	0	0	3
FBgn0000015	153	221	238	270	235	185	182	256	204	81	86	84	110	124	72	54	60	82	139	124	181	112	105
FBgn0278597	0	1	1	0	1	2	0	1	0	0	1	0	0	0	1	2	0	3	0	0	0	4	0
FBgn0038458	4	3	3	0	10	19	15	20	9	7	52	25	9	22	211	173	75	108	209	328	192	349	227
FBgn0015008	67	141	78	58	157	476	242	431	137	130	509	447	451	488	1490	1652	587	1241	1580	1780	1147	2224	2238
FBgn0015011	1259	1584	1241	2086	1240	1296	632	1689	899	1273	364	455	351	759	1081	714	1500	373	475	1224	442	678	357
FBgn0038460	341	119	281	302	107	168	94	161	73	100	115	120	85	97	172	145	91	105	201	185	197	318	153
FBgn0267152	0	0	0	0	0	0	0	0	0	0	0	0	0	0	0	0	0	0	0	0	0	0	0
FBgn0043069	3	4	8	3	3	6	5	19	5	23	50	67	18	21	43	72	42	57	79	111	75	103	39
FBgn0038461	1016	873	711	714	625	812	596	751	540	343	713	634	482	459	579	647	444	580	551	595	601	586	507
FBgn0266748	0	0	1	0	0	0	0	1	0	0	0	0	0	0	0	3	1	0	0	0	0	0	2
FBgn0266740	0	0	0	0	0	0	0	0	0	4	0	2	2	1	38	14	14	9	33	59	31	43	30
FBgn0051274	1	1	3	0	2	2	2	1	1	6	23	22	9	6	33	17	20	17	22	41	59	61	20
FBgn0038462	946	727	660	723	619	729	537	597	452	323	657	576	447	393	524	619	407	580	506	454	502	452	385
FBgn0038463	4311	3563	4228	3736	4087	3848	2599	2857	3527	1036	1568	1451	1327	1095	812	986	829	942	660	625	742	688	715
FBgn0266917	2169	1712	1351	1506	1223	1664	1141	1210	825	518	942	991	921	880	1190	1144	904	1041	991	735	724	975	1169
FBgn0038465	5772	6268	7008	7123	4201	6940	5482	3604	5227	3678	4903	4626	3907	3484	3423	3875	2928	4102	6441	6385	3983	7121	6394
FBgn0038466	1769	388	884	750	552	706	425	869	504	390	348	81	113	283	28	159	280	106	71	46	40	71	61
[truncated: 15,808 more rows]

## Sheet: c
Hours	PEPCK					PEPCK2
72	1.03958	1.05482	0.815072	1.11884		0.926106	1.29168	0.794572	1.05208
84	1.16393	1.03311	1.39765	2.20076	2.65369	0.98231	1.61692	1.38343	0.873119	1.6509
96	6.38196	1.83147	5.18376	4.79656	7.37682	1.68559	1.02119	3.37117	1.94295	4.88463
108	4.78328	6.92109	5.43018	5.24157		5.22434	8.56379	4.58604	7.68609
120	16.7722	13.5198	9.36319			29.7589	29.1465	18.029
		Tukey's multiple comparisons test	Adjusted P Value				Tukey's multiple comparisons test	Adjusted P Value
		72 vs. 84	0.9905				72 vs. 84	0.9997
		72 vs. 96	0.0677				72 vs. 96	0.8304
		72 vs. 108	0.0468				72 vs. 108	0.0114
		72 vs. 120	<0.0001				72 vs. 120	<0.0001
		84 vs. 96	0.1319				84 vs. 96	0.8909
		84 vs. 108	0.0908				84 vs. 108	0.0114
		84 vs. 120	<0.0001				84 vs. 120	<0.0001
		96 vs. 108	0.9976				96 vs. 108	0.087
		96 vs. 120	0.0002				96 vs. 120	<0.0001
		108 vs. 120	0.0008				108 vs. 120	<0.0001
