# Supplementary material for: The fate of pyruvate dictates cell growth by modulating cellular redox potential
Source: eLife. 2025 Dec 16;13:RP103705. doi: 10.7554/eLife.103705 (PMC12707817; doi:10.7554/eLife.103705)
Supplement: Figure 1—figure supplement 2—source data 1. [file elife-103705-fig1-figsupp2-data1.xlsx]

## Sheet: b
hours	MPC1			MPC2
12	5.21984	10.7991	9.79272	8.95649	14.5433	11.0366
24	21.9842	19.1087	18.0146	19.9145	18.9997	16.1326
48	28.1314	30.3096	27.5802	21.1772	21.5127	22.8269

## Sheet: c
hours	Control						MPC+
12	920.985	924.637	846.948	1025.31	889.982	1045.13	649.49	868.47	746.466	826.887	604.381	711.472
24	1832.59	1978.27	1945.41	1853.57	1866.59	2008.12	1373.58	1402.29	1268.88	1235.59	1425.98	1662.96
36	2647.88	2365.46	2219.26	2342.43	2682.84	2702.47	2122.59	1586.6	1324.64	1096.19	1604.8	1663.48
48	3155.96	3732.28	3435.51	3076.9	3204.97	2546.57	1912.96	2342.37	2057.39	1839.92	2280.53	1858.41
	Control - MPC+
	12	0.403
	24	0.0012
	36	<0.0001
	48	<0.0001

## Sheet: h-k
	h- DNA		i- RNA		j- TAGs		k- Protein
	Control	MPC+	Control	MPC+	Control	MPC+	Control	MPC+
	625	900	33500	26600	2458.75	1365.62	1178.86	568.76
	570	535	28500	28000	2075.91	1636.97	849.174	294.297
	800	650	32500	22750	1859.85	1868.42	802.066	451.116
ttest		0.996		0.605		0.3545		0.0053

## Sheet: m
GFP	MPC-OE
0.00395	0.006147
0.003964	0.008389
0.003549	0.005952
0.003765	0.00754
0.003568	0.008912
0.004327	0.010097
0.006711	0.013932
0.005721	0.015734
0.005602	0.01032
0.0041	0.012271
0.003441	0.006961
0.004061	0.006164
0.005719	0.005331
0.004198	0.005816
0.00519	0.007666
0.004905	0.009214
0.004053	0.004436
0.003602	0.005595
0.004802	0.004126
0.004649	0.004601
0.006506	0.003398
0.006024	0.003988
Welch's t test	0.0005

## Sheet: n
Control	MPC+
0.709179	0.499849
0.474145	0.618609
0.784681	0.365445
0.889842	0.272255
0.867064	0.889425
0.669022	0.511276
0.682167	0.669963
0.759498	0.666672
0.655809	0.72315
0.632691	0.827476
0.724601	0.497525
0.341237	0.715016
0.843558	0.389695
0.363617	0.763132
0.561255	0.38136
0.50543	0.447121
0.744851	0.380749
Welch's t test	0.1258

## Sheet: p
GFP	MPC-OE
49.056	56.891
67.828	35.501
78.534	43.973
76.387	34.529
36.834	16.694
55.309	48.005
51.481	42.805
60.293	59.792
46.041	72.513
59.99	28.537
49.547	26.981
37.245	29.675
55.722	29.783
45.782	26.823
47.068	32.278
30.502	51.963
32.042	40.723
37.096	27.897
29.038	25.322
26.809	43.852
26.449	20.481
33.544	23.882
21.982	28.567
25.027	21.513
23.389	16.482
15.137	51.236
22.44	55.68
24.537	32.664
28.932	24.149
20.974	50.807
22.508	25.666
Welch's t test	0.3678
