# Supplementary material for: The fate of pyruvate dictates cell growth by modulating cellular redox potential
Source: eLife. 2025 Dec 16;13:RP103705. doi: 10.7554/eLife.103705 (PMC12707817; doi:10.7554/eLife.103705)
Supplement: Figure 1—source data 1. [file elife-103705-fig1-data1.xlsx]

## Sheet: c
	72 Hours	84 Hours	96 Hours	108 Hours	120 Hours
	773.433	1438.09	1865.46	2387.33	2811.79
	997.761	1310.4	1830.75	2429.11	2304.57
	774.4	1273.07	1591.29	2858.56	2772.49
	874.411	1335.18	2146.88	2328.9	2407.8
	814.474	1318.29	1468.79	2333.35	2913.43
	755.269	1514.65	1587.08	2292.5	2979.3
	721.579	1597.91	1920.42	2597.96	2527.96
	733.753	1388.21	1645.6	2468.16	2709.83
	Tukey's multiple comparisons test	Adjusted P Value
	72 Hours vs. 84 Hours	<0.0001
	72 Hours vs. 96 Hours	<0.0001
	72 Hours vs. 108 Hours	<0.0001
	72 Hours vs. 120 Hours	<0.0001
	84 Hours vs. 96 Hours	0.0029
	84 Hours vs. 108 Hours	<0.0001
	84 Hours vs. 120 Hours	<0.0001
	96 Hours vs. 108 Hours	<0.0001
	96 Hours vs. 120 Hours	<0.0001
	108 Hours vs. 120 Hours	0.1425

## Sheet: d
Hours	dPyK					MPC1					MPC2					Pdha					Dlat
72	0.637391	1.28276	0.768571			0.992707	1.13103	0.940963	0.947065		0.97578	1.15496	0.887404			0.889151	1.10305	1.00382	1.01572		0.835377	1.10842	1.06696	1.0122
84	2.03108	1.97281	1.55644			0.974899	1.14691	0.822336	1.06758		1.00758	1.0825	0.826901	0.986727		1.0087	1.03204	1.06844	0.826737	1.14274	1.27677	1.14989	1.23072
96	0.762204	0.499394	0.881022	0.809022	0.766443	0.612343	0.466069	0.364369	0.547767	0.514522	0.607709	0.379981	0.59174	0.449684	0.530931	0.782683	0.424695	0.755498	0.764983	0.841771	0.891619	0.546578	0.730269	0.727238	0.924984
108	0.345858	0.486749	0.503914	0.518081		0.088161	0.166854	0.22506	0.155906	0.201655	0.072692	0.148058	0.242594	0.163402	0.19151	0.20173	0.281557	0.411938	0.462813	0.392972	0.388638	0.50052	0.36691	0.536816	0.38064
120	0.460493	0.367101	0.651686	0.323817		0.10297	0.139746	0.151477	0.119825	0.116367	0.122134	0.153955	0.159175	0.14022	0.13444	0.227746	0.182314	0.26508	0.181432		0.409944	0.418558	0.362864	0.460253
	Tukey's multiple comparisons test	Adjusted P Value					Tukey's multiple comparisons test	Adjusted P Value				Tukey's multiple comparisons test	Adjusted P Value				Tukey's multiple comparisons test	Adjusted P Value				Tukey's multiple comparisons test	Adjusted P Value
	72 vs. 84	<0.0001					72 vs. 84	>0.9999				72 vs. 84	0.9974				72 vs. 84	0.9999				72 vs. 84	0.1469
	72 vs. 96	0.4154					72 vs. 96	<0.0001				72 vs. 96	<0.0001				72 vs. 96	0.005				72 vs. 96	0.0287
	72 vs. 108	<0.0001					72 vs. 108	<0.0001				72 vs. 108	<0.0001				72 vs. 108	<0.0001				72 vs. 108	<0.0001
	72 vs. 120	<0.0001					72 vs. 120	<0.0001				72 vs. 120	<0.0001				72 vs. 120	<0.0001				72 vs. 120	<0.0001
	84 vs. 96	<0.0001					84 vs. 96	<0.0001				84 vs. 96	<0.0001				84 vs. 96	0.0014				84 vs. 96	<0.0001
	84 vs. 108	<0.0001					84 vs. 108	<0.0001				84 vs. 108	<0.0001				84 vs. 108	<0.0001				84 vs. 108	<0.0001
	84 vs. 120	<0.0001					84 vs. 120	<0.0001				84 vs. 120	<0.0001				84 vs. 120	<0.0001				84 vs. 120	<0.0001
	96 vs. 108	0.0071					96 vs. 108	0.0003				96 vs. 108	0.0002				96 vs. 108	<0.0001				96 vs. 108	0.0004
	96 vs. 120	0.0043					96 vs. 120	<0.0001				96 vs. 120	<0.0001				96 vs. 120	<0.0001				96 vs. 120	0.0004
	108 vs. 120	0.9999					108 vs. 120	0.9822				108 vs. 120	0.9985				108 vs. 120	0.4464				108 vs. 120	0.9988

## Sheet: g
	Control	MPC+	Mpc1-KD
	1998.02	664.088	2533.71
	2126.02	774.801	2004.51
	2172.45	1112.16	2095.86
	2153.25	981.033	2315.54
	2035.46	617.337	2474.2
	Tukey's multiple comparisons test	Adjusted P Value
	Control vs. MPC+	<0.0001
	Control vs. Mpc1-KD	0.2843
	MPC+ vs. Mpc1-KD	<0.0001

## Sheet: i
9% Sugar			No Sugar
Control	MPC+	Mpc1-KD	Control	MPC+	Mpc1-KD
1856.02	954.414	1934.97	1457.37	1497.27	1900.62
1899.39	936.143	2154.88	1312.47	1510.34	2101.34
2554.7	1207.38	2412.63	1501.78	1630.83	2080.87
2137.97	713.956	1886.38	1404.61	1416.21	1873.16
2070.43	1122.37	2357.53	1573.38	1548.02	2282.25
	Tukey's multiple comparisons test	Adjusted P Value
	Control, 9% sugar vs. MPC+,9% sugar	<0.0001
	Control, 9% sugar vs. Mpc1-KD, 9% sugar	0.9988
	Control, 9% sugar vs. Control, No sugar	0.0002
	Control, 9% sugar vs. MPC+, No sugar	0.0007
	Control, 9% sugar vs. Mpc1-KD, No sugar	0.9968
	MPC+,9% sugar vs. Mpc1-KD, 9% sugar	<0.0001
	MPC+,9% sugar vs. Control, No sugar	0.0083
	MPC+,9% sugar vs. MPC+, No sugar	0.002
	MPC+,9% sugar vs. Mpc1-KD, No sugar	<0.0001
	Mpc1-KD, 9% sugar vs. Control, No sugar	<0.0001
	Mpc1-KD, 9% sugar vs. MPC+, No sugar	0.0003
	Mpc1-KD, 9% sugar vs. Mpc1-KD, No sugar	0.9544
	Control, No sugar vs. MPC+, No sugar	0.9907
	Control, No sugar vs. Mpc1-KD, No sugar	0.0005
	MPC+, No sugar vs. Mpc1-KD, No sugar	0.0023

## Sheet: j
unsupplemented		UK5099 supplemented
Control	MPC+	Control	MPC+
1986.98	1009	2653.04	1578.97
2096.39	812.06	2277.81	2128.93
2241.51	975.309	1889.61	1598.69
2074.03	963.027	2395.46
2058.6	606.477	2712.09
	Tukey's multiple comparisons test	Adjusted P Value
	Control vs. MPC+	<0.0001
	Control vs. UK5099	0.2437
	Control vs. MPC+, UK5099	0.2819
	MPC+ vs. UK5099	<0.0001
	MPC+ vs. MPC+, UK5099	0.0007
	UK5099 vs. MPC+, UK5099	0.014

## Sheet: k
		Control			MPC+			ttest
	DNA	0.93985	0.857143	1.20301	1.35338	0.804511	0.977444	0.828228
	RNA	1.06349	0.904762	1.03175	0.844444	0.888889	0.722222	0.0594565
	TAGs	1.15353	0.97392	0.872555	0.640683	0.767992	0.876574	0.0917184
	Protein	1.24963	0.900152	0.850216	0.602905	0.311965	0.478197	0.0299445

## Sheet: m
	Control	MPC+
	0.696472	0.0707832
	0.803277	0.181679
	0.772469	0.182462
	1.12941	0.467447
	1.01819	0.634927
	1.23628	0.468562
	0.876905	0.289362
	0.80402	0.240778
	0.980606	0.264145
	1.02478	0.432282
	0.858608	0.421678
	0.788779	0.830171
	1.13479	0.206424
	1.18328	0.27967
	0.725789	0.333818
	0.610958	0.205343
	0.608698	0.333446
	0.607977	0.262217
	0.93081	0.144633
	0.982743	0.175491
	1.32323	0.138145
	1.05058	0.619427
	0.949982	1.00629
	0.86046	0.502883
	0.883993	0.220079
	0.926281	0.249023
	0.988683	0.404103
	0.920424	0.529731
	1.19858	0.373002
	1.32928	0.655328
	1.28128	0.61601
	0.982628	0.449743
	0.944006	0.690727
	0.511013	0.648364
	0.982969	0.44381
	0.968711	0.61746
	0.902813	0.458762
	0.952578	0.700033
	1.14782	0.520979
	1.08939	0.593596
	1.1177	0.626253
	1.04028	0.568408
	1.04295	0.593242
	0.906697	0.580742
	1.12566	0.537481
	1.08911	0.525307
	0.961122	0.608052
	0.958807	0.462078
	0.876308	0.479221
	0.60069	0.382486
	1.00922	0.434606
	0.958295	0.397727
	0.905889	0.364412
	0.829401	0.528012
	1.09982	0.718177
	1.00128	0.411113
	0.969824
	1.00169
	1.04201
	1.10964
	1.06105
	0.894184
	0.970045
	0.919933
	0.926805
	0.998459
	ttest	9.51056e-30
