# Supplementary material for: The fate of pyruvate dictates cell growth by modulating cellular redox potential
Source: eLife. 2025 Dec 16;13:RP103705. doi: 10.7554/eLife.103705 (PMC12707817; doi:10.7554/eLife.103705)
Supplement: Figure 2—figure supplement 1—source data 1. [file elife-103705-fig2-figsupp1-data1.xlsx]

## Sheet: a
Geneid	Con_12h	Con_12h	Con_12h	Con_12h	Con_12h	MPC+_12h	MPC+_12h	MPC+_12h	MPC+_12h	MPC+_12h	Con_24h	Con_24h	Con_24h	Con_24h	Con_24h	MPC+_24h	MPC+_24h	MPC+_24h	MPC+_24h	MPC+_24h
FBgn0267431	1	1	1	1	6	2	0	0	3	0	0	0	1	7	0	0	1	0	0	2
FBgn0085804	0	0	0	0	0	0	0	0	0	0	0	0	0	0	0	0	0	0	0	0
FBgn0039987	0	0	0	0	0	0	0	0	0	0	0	0	0	0	0	0	0	0	0	0
FBgn0267798	56	41	46	97	58	23	82	64	48	53	45	83	55	35	59	73	127	64	89	72
FBgn0267797	0	0	0	1	0	0	0	0	0	0	0	0	0	6	0	1	1	0	0	0
FBgn0058182	0	0	0	0	0	0	0	0	0	0	0	0	0	0	0	0	0	0	0	0
FBgn0267430	2	2	0	3	2	5	4	2	3	0	6	8	15	15	17	10	13	11	4	7
FBgn0266747	0	0	0	0	1	0	0	1	0	0	4	3	2	3	1	1	0	0	0	0
FBgn0086917	63	73	0	36	28	229	50	2	108	73	1	66	62	1	50	16	176	19	45	135
FBgn0010247	284	183	108	275	252	286	209	213	483	300	242	482	546	457	308	380	435	110	115	213
FBgn0086378	328	205	185	296	275	378	358	273	371	263	234	358	274	407	283	239	371	171	239	217
FBgn0267816	0	0	0	0	0	0	0	0	0	0	0	0	0	3	1	0	2	0	0	0
FBgn0263977	980	905	865	1207	1211	1128	1448	994	1272	998	717	1180	1230	1188	1085	742	1321	924	801	971
FBgn0069923	318	274	209	265	269	316	508	289	324	295	204	369	278	261	251	169	517	403	296	269
FBgn0039955	417	259	251	412	390	456	438	409	564	412	299	440	435	420	302	307	475	257	245	298
FBgn0259821	17	16	3	15	18	13	11	9	20	23	4	32	22	11	20	17	39	2	2	20
FBgn0027341	148	90	26	50	76	113	184	43	99	171	87	372	85	53	130	73	161	44	46	126
FBgn0085812	1	0	0	1	1	1	1	2	0	3	2	4	15	12	4	5	4	4	2	0
FBgn0058198	3	10	1	2	25	49	22	8	62	69	2	642	0	0	1	0	32	1	0	1
FBgn0286937	0	0	1	0	0	0	0	1	0	0	0	2	4	3	0	0	0	1	0	0
FBgn0037213	93	80	44	110	71	89	107	89	150	135	118	177	76	65	89	112	136	102	122	166
FBgn0053294	2	3	0	0	0	1	1	1	2	1	1	1	0	3	1	0	0	0	0	3
FBgn0000500	2	10	1	6	5	9	5	0	8	1	0	7	1	0	3	4	21	4	0	4
FBgn0037215	539	409	548	644	713	616	728	720	898	767	525	520	537	415	434	435	604	334	698	630
FBgn0037217	53	225	106	15	53	251	373	88	64	81	39	37	52	20	43	64	85	22	47	42
FBgn0037218	374	239	253	362	383	363	278	396	643	441	268	435	476	436	288	387	281	165	297	286
FBgn0051516	1	12	2	4	1	9	12	2	4	2	3	3	0	2	1	2	0	0	0	1
FBgn0261436	715	690	1071	812	1101	956	1005	1105	886	772	450	383	599	374	497	446	444	330	500	758
FBgn0037220	288	195	255	397	354	336	273	336	513	354	199	376	437	347	306	349	287	133	232	333
FBgn0015331	78	58	55	89	117	106	62	81	154	100	79	162	222	227	128	153	141	57	71	104
FBgn0010225	6454	5434	6296	8840	9156	7928	7913	9875	12526	11079	5089	5110	6011	3212	5480	4891	5214	2878	7429	7740
FBgn0267988	0	0	0	0	1	1	0	0	0	0	0	2	1	0	1	1	2	0	0	0
FBgn0037222	163	123	152	237	231	213	215	234	280	260	286	245	336	301	223	325	209	171	139	196
FBgn0085334	26	3	0	1	2	11	1	2	6	5	0	108	0	3	0	2	6	2	0	0
FBgn0037223	5	1	0	0	0	0	0	0	0	0	0	4	2	1	1	0	0	0	0	0
FBgn0037224	577	31	0	0	0	1	10	1	1	0	0	1	0	1	0	2	0	0	1	0
FBgn0037225	170	51	33	75	78	104	86	59	58	147	46	73	25	70	29	49	59	93	39	9
FBgn0250821	0	10	4	6	4	0	0	0	15	20	50	60	95	129	49	95	33	49	11	17
FBgn0037227	68	3	2	0	0	1	9	0	1	11	2	0	1	1	0	1	2	7	0	0
FBgn0041621	0	0	0	0	0	0	0	0	0	0	0	0	0	0	0	0	0	0	0	0
FBgn0037228	142	275	278	444	380	353	271	413	538	567	301	200	282	174	281	285	238	280	229	296
FBgn0037229	0	16	1	3	2	49	5	11	35	20	1	1	17	14	4	15	13	31	8	16
FBgn0267157	0	0	0	2	0	1	1	0	2	0	1	0	1	0	0	0	0	0	0	1
FBgn0041605	410	716	366	1043	795	934	500	806	1911	1420	952	1022	754	578	675	854	678	644	539	976
FBgn0037230	1114	1215	1962	1340	2215	2003	1847	2704	1974	1745	190	736	795	574	478	292	639	772	777	890
FBgn0262214	0	0	0	0	0	0	0	0	0	0	0	0	0	0	0	0	0	0	0	0
FBgn0037231	134	112	62	105	130	140	156	102	183	110	132	206	237	310	175	214	225	126	119	117
FBgn0027930	472	473	459	443	591	635	674	591	579	546	461	244	386	360	369	265	304	273	343	547
FBgn0267815	2	1	0	2	2	0	6	5	4	5	4	1	1	0	2	1	0	3	1	3
FBgn0037232	260	214	269	277	331	236	309	430	360	243	114	256	306	241	199	155	244	113	168	169
FBgn0261086	25	11	3	31	18	46	17	22	62	28	30	40	81	71	58	53	53	15	7	36
FBgn0037234	105	82	64	107	87	127	87	76	152	105	73	121	144	165	93	87	125	57	47	79
FBgn0027866	371	696	476	1868	1528	1195	954	1483	2441	2537	4550	2970	1426	3516	1154	1059	885	970	814	834
FBgn0037236	111	85	123	115	131	148	137	168	141	134	81	123	138	110	88	170	137	84	109	119
FBgn0040687	0	0	0	0	0	0	0	0	0	2	3	1	0	2	3	4	3	4	0	0
FBgn0037235	129	142	102	257	227	202	241	143	313	301	468	364	322	413	215	253	227	123	155	179
FBgn0261434	2	4	1	2	1	2	0	6	12	21	1	2	6	0	2	19	1	97	0	1
FBgn0037238	15	18	8	25	19	29	13	24	43	33	7	13	22	11	8	34	27	24	7	25
FBgn0266227	19	22	2	18	12	20	8	8	15	15	3	19	15	2	8	9	36	3	0	14
FBgn0037239	1659	1496	1858	2083	2623	2236	2382	2785	2522	2490	1130	1245	2300	1266	1610	775	1268	1019	1161	1598
FBgn0037240	218	172	117	217	230	255	173	247	443	263	209	456	482	296	244	354	228	91	167	270
FBgn0003882	306	250	295	364	401	308	364	390	477	378	230	335	332	276	210	303	230	198	252	365
FBgn0037241	135	126	88	169	176	163	211	129	209	168	120	159	153	165	132	97	154	145	155	153
FBgn0086608	29	12	10	12	18	26	17	9	19	32	35	45	22	47	20	19	50	16	38	13
FBgn0267814	2	2	1	3	4	4	0	2	5	5	13	12	7	17	8	7	5	4	3	9
FBgn0267661	12	5	1	12	6	11	15	8	7	12	38	32	13	37	16	7	21	19	13	7
FBgn0037242	160	132	163	198	194	189	218	199	316	220	198	348	423	442	285	337	349	161	160	218
FBgn0086605	310	240	252	348	370	398	367	328	469	295	240	443	393	494	326	271	367	222	199	336
FBgn0037244	87	88	118	151	200	191	163	173	214	212	220	204	225	251	155	108	162	215	139	139
FBgn0266697	9	3	1	1	6	9	6	4	4	2	4	5	6	3	6	5	6	10	3	7
FBgn0263594	3751	2958	3240	4170	4537	3861	4009	4586	6564	4760	2397	4205	4526	3362	2877	5304	3389	3322	3206	4171
FBgn0052944	12	11	4	27	12	18	5	6	22	17	36	37	74	64	39	43	40	6	5	16
FBgn0051528	17	10	4	32	18	34	24	21	60	28	72	102	183	249	99	119	80	42	15	40
FBgn0037248	391	309	406	531	468	384	386	631	818	606	183	276	341	204	234	358	214	241	270	418
FBgn0051525	29	28	11	79	37	54	33	38	95	37	108	162	209	308	141	184	199	65	26	56
FBgn0037249	2029	1445	2122	2145	2548	2204	2115	2783	3116	2668	1259	1920	2214	1973	1744	1910	1633	1450	1533	2075
FBgn0037250	155	93	75	112	126	114	117	127	199	119	57	140	159	158	102	132	139	101	83	95
FBgn0267813	0	0	0	0	0	0	0	0	0	0	2	1	2	2	0	6	0	2	0	2
FBgn0037251	123	153	115	156	147	187	211	147	199	147	138	184	138	178	132	101	131	111	98	145
FBgn0264983	0	0	0	0	0	0	0	1	0	0	2	6	3	2	0	3	2	0	0	0
FBgn0037252	274	184	219	268	246	303	214	301	483	326	214	330	401	307	236	383	265	129	175	296
FBgn0051522	357	267	287	233	210	417	313	367	261	251	171	285	194	245	133	83	252	80	216	197
FBgn0263620	15	18	11	22	19	15	22	18	32	23	8	13	20	23	15	14	20	21	14	12
FBgn0051523	319	155	190	170	302	411	383	246	381	385	323	528	530	735	320	486	562	186	288	220
FBgn0037254	0	0	0	1	0	0	0	0	3	2	19	21	66	68	26	37	18	2	1	13
FBgn0037255	234	193	186	240	237	214	252	257	343	249	149	235	264	266	199	218	176	112	142	196
FBgn0085386	20	20	6	13	11	19	13	8	34	10	0	15	17	2	10	12	22	2	1	10
FBgn0085454	0	0	0	1	0	0	0	0	2	1	33	36	93	76	55	49	56	8	10	19
FBgn0051526	0	0	0	1	0	3	0	0	3	0	0	3	4	14	2	2	1	1	2	5
FBgn0037260	0	0	0	0	0	0	0	0	0	0	0	0	0	0	0	1	0	0	0	0
FBgn0052945	0	1	0	0	0	0	0	0	2	0	7	12	14	22	4	20	24	4	5	1
FBgn0267118	0	0	0	2	0	1	0	0	0	0	0	0	0	1	0	0	0	0	1	0
FBgn0265376	0	0	0	0	0	0	3	0	0	0	1	0	0	0	0	2	2	0	0	1
FBgn0087012	4	4	2	2	1	5	5	4	9	10	3	7	15	4	5	4	5	5	5	1
FBgn0267233	1	0	0	0	0	0	0	1	0	0	0	0	0	0	0	0	0	0	0	0
FBgn0037261	474	365	333	475	444	467	540	504	754	554	351	485	600	489	362	482	490	324	314	377
FBgn0286036	0	0	0	0	0	0	0	0	0	0	0	0	0	0	0	0	0	0	0	0
FBgn0037262	180	100	106	209	159	254	168	168	261	181	149	300	372	431	241	286	280	138	86	157
FBgn0037263	7	8	5	10	13	11	10	7	9	7	4	1	10	16	7	1	8	3	3	7
FBgn0040466	38	45	39	36	46	41	51	38	60	42	41	67	54	53	56	45	69	50	28	42
FBgn0022981	57	26	14	35	58	63	23	54	118	51	43	118	186	181	82	115	108	22	17	60
FBgn0265038	0	0	0	0	0	0	0	0	0	0	3	3	7	4	0	9	3	0	2	0
FBgn0087013	2304	1918	3158	3714	3919	2764	2627	3982	5370	4522	1516	2385	2811	1983	1710	2640	1709	1373	1989	2759
FBgn0037265	24	23	25	34	46	47	38	39	52	44	32	22	33	26	24	31	24	16	31	35
FBgn0263346	211	124	148	181	162	209	167	238	374	252	180	298	336	310	134	228	150	57	157	195
FBgn0265039	0	0	0	0	0	0	0	0	0	0	1	0	2	1	3	1	1	0	0	0
FBgn0265040	0	0	0	0	0	0	0	0	0	0	2	3	2	2	0	3	0	1	0	0
FBgn0053927	0	0	0	0	0	0	0	0	0	0	0	0	0	0	0	0	0	0	0	0
FBgn0037270	1092	1024	1149	1208	1351	1385	1606	1272	1620	1374	837	1102	1154	874	935	986	992	743	918	1178
FBgn0266228	0	1	0	1	1	3	0	2	3	0	0	0	0	0	0	3	1	13	1	3
FBgn0027570	237	215	196	132	247	430	238	370	496	280	109	157	200	158	190	718	387	915	579	398
FBgn0026620	403	311	374	424	467	471	360	488	638	441	286	557	651	497	385	508	507	231	249	404
FBgn0267812	0	0	0	0	0	0	0	0	0	0	0	0	0	1	0	0	0	0	0	0
FBgn0283546	0	0	0	0	0	0	0	0	0	0	0	0	0	0	0	0	0	0	0	0
FBgn0010750	254	193	175	225	275	264	205	260	403	245	174	319	392	341	214	211	261	95	139	208
FBgn0264907	77	136	40	100	135	176	35	80	80	93	48	59	49	42	41	36	63	19	96	69
FBgn0264897	0	0	0	0	0	0	0	0	0	0	0	0	3	0	1	4	1	0	0	1
FBgn0037275	3	4	0	1	4	5	2	1	8	5	1	15	3	7	7	1	7	0	2	0
FBgn0037276	21	5	12	36	24	40	7	17	88	36	145	172	301	325	138	212	147	27	38	55
FBgn0260794	1006	755	920	961	996	1105	680	1373	2475	1650	823	1434	1817	1426	812	2250	871	743	666	914
FBgn0026417	14	14	9	17	16	22	11	12	28	19	8	17	6	16	17	48	22	23	29	19
FBgn0037279	336	245	224	334	354	325	392	366	543	439	349	416	388	387	293	336	358	194	278	333
FBgn0037280	1	0	0	1	0	3	0	1	0	1	1	0	0	2	3	0	0	3	0	0
FBgn0037282	153	92	77	145	130	153	110	129	237	137	132	154	262	215	117	156	139	71	79	144
FBgn0037283	1	0	1	9	2	2	0	3	13	2	55	73	132	156	72	104	57	25	22	32
FBgn0037284	0	0	0	1	0	0	0	0	0	0	1	3	1	4	1	3	0	0	0	0
FBgn0003002	4	9	0	6	1	9	1	2	5	1	5	9	4	4	3	4	3	1	2	6
FBgn0020280	0	0	0	1	1	1	1	0	3	2	25	23	51	65	22	48	30	9	8	8
FBgn0267140	0	0	0	0	0	0	2	0	1	0	2	3	3	5	2	4	0	2	0	0
FBgn0004913	212	146	152	193	230	236	179	210	392	214	136	297	385	379	194	259	238	99	130	175
FBgn0265082	346	244	294	312	311	363	277	447	534	456	276	294	266	282	166	263	238	115	291	338
FBgn0266698	0	0	0	0	0	0	0	0	0	0	4	1	5	7	0	0	3	0	0	4
FBgn0004183	0	0	0	0	0	0	0	0	1	0	0	0	0	2	0	0	0	0	0	0
FBgn0004436	474	390	370	619	566	577	600	528	876	626	467	628	634	719	440	1307	729	590	512	517
FBgn0037288	0	0	0	0	0	0	0	0	0	1	0	61	0	0	0	0	9	0	0	0
FBgn0250839	55	26	3	0	0	10	8	0	0	0	1	5	0	0	2	0	6	0	5	0
FBgn0037290	12	12	4	18	16	130	8	7	25	34	6	192	10	15	6	12	49	1	18	5
FBgn0037291	4	0	0	2	0	0	1	1	1	5	25	16	18	28	7	18	22	4	8	3
FBgn0263455	0	0	0	0	0	0	0	0	0	0	0	2	0	0	0	0	0	0	0	0
FBgn0263343	0	0	0	0	0	0	0	1	2	0	9	7	11	11	3	16	7	3	1	3
FBgn0037292	0	0	0	0	0	0	0	0	1	0	0	0	0	1	0	0	0	1	0	0
FBgn0267145	0	0	0	0	0	0	0	0	0	0	0	0	0	0	0	1	0	1	0	0
FBgn0286032	0	1	0	0	0	0	0	0	2	0	0	0	0	1	0	0	0	1	0	0
FBgn0263626	0	0	0	0	0	0	0	0	0	0	0	2	1	1	1	0	0	1	0	1
FBgn0267148	0	0	0	0	0	0	0	0	0	0	0	0	0	0	0	0	0	0	0	0
FBgn0010313	75	81	38	67	107	139	63	83	142	98	71	112	119	52	55	56	110	58	65	78
FBgn0262605	0	0	0	0	0	0	0	0	0	0	1	4	0	1	0	0	2	0	0	0
FBgn0037293	114	88	113	126	146	147	165	158	187	152	127	168	171	158	125	284	189	93	138	133
FBgn0040684	1	0	1	3	1	4	0	2	5	6	8	15	27	23	15	27	12	8	1	3
FBgn0037295	22	20	8	12	20	31	23	26	46	15	38	46	82	73	36	37	32	12	7	24
FBgn0037294	14	12	8	18	23	17	23	14	29	14	9	32	33	36	11	12	18	1	0	4
FBgn0286879	0	1	0	1	0	1	1	0	2	0	1	1	1	0	1	0	0	0	0	0
FBgn0259212	161	105	84	123	130	173	105	149	290	145	112	225	267	184	121	199	129	50	66	110
FBgn0263018	0	0	0	0	0	0	0	0	0	0	0	0	0	0	0	0	0	0	0	0
FBgn0037296	11	5	7	44	22	29	17	19	72	23	77	106	219	196	119	123	114	41	20	59
FBgn0037297	83	71	62	102	104	95	113	82	179	102	116	147	160	148	120	103	105	47	57	99
FBgn0037298	811	741	854	1182	1246	1069	1103	1179	1523	1230	1063	1151	1322	1069	1071	798	965	602	971	1362
FBgn0040682	0	0	0	2	0	1	0	0	0	1	0	0	0	0	0	0	0	0	0	0
FBgn0037299	158	121	98	185	151	196	176	169	247	152	129	222	228	276	184	209	198	105	105	117
FBgn0040208	155	97	74	143	163	161	126	160	240	165	156	226	248	297	142	160	176	83	64	146
FBgn0037301	318	160	239	316	305	299	241	349	452	288	212	408	440	507	242	348	289	133	176	263
FBgn0087005	0	0	0	0	0	0	0	0	1	0	0	1	0	0	0	0	0	0	0	0
FBgn0260462	431	347	228	407	443	539	432	413	668	548	375	535	556	590	353	562	546	213	477	401
FBgn0053293	1	3	0	10	2	9	1	5	23	9	84	97	178	237	91	197	121	41	19	37
FBgn0264789	0	0	0	0	0	3	1	0	0	5	2	0	1	5	1	2	0	1	0	0
FBgn0037304	0	0	1	0	1	0	1	0	0	0	0	1	0	2	0	2	1	0	1	1
FBgn0037305	468	335	330	388	396	478	607	447	394	308	180	272	355	364	281	202	279	272	181	253
FBgn0264785	178	296	315	192	409	532	288	389	367	326	316	262	265	357	160	263	202	98	129	134
FBgn0037307	0	0	0	3	4	5	0	5	3	4	11	15	25	32	8	28	9	5	2	8
FBgn0267443	3	7	13	4	14	18	11	12	6	5	5	6	0	4	3	0	4	3	5	1
FBgn0266393	0	0	0	0	0	0	0	0	0	0	0	0	0	0	0	0	0	0	0	0
FBgn0013576	667	495	403	598	618	969	721	665	994	812	604	760	693	739	517	619	731	360	541	519
FBgn0051538	19	10	22	100	30	54	13	35	171	79	452	570	980	1144	474	855	489	182	123	206
FBgn0037310	38	16	17	59	40	58	29	30	121	45	85	144	265	291	117	143	140	77	19	59
FBgn0037312	430	418	434	464	549	605	691	468	576	453	530	594	745	759	638	293	471	367	366	557
FBgn0037313	434	380	292	407	441	521	592	400	547	380	365	432	473	545	367	330	490	353	300	378
FBgn0250746	976	708	738	919	1025	960	1055	1033	1278	961	839	1314	1410	1410	1034	888	1100	762	873	1072
FBgn0037315	148	95	76	147	146	198	110	137	240	174	157	281	316	355	165	246	196	92	94	119
FBgn0264912	0	0	0	0	0	0	0	1	0	0	0	0	0	0	0	1	0	0	0	0
FBgn0051542	0	0	0	0	0	0	0	0	0	0	0	0	0	0	0	0	0	0	0	0
FBgn0085306	0	0	0	0	0	0	0	0	0	0	0	0	0	0	0	0	0	0	0	0
FBgn0003275	268	244	249	331	358	312	388	263	412	257	174	266	293	346	246	279	288	210	142	263
FBgn0086695	40	41	51	66	56	40	70	55	84	61	17	34	53	48	31	30	33	28	22	38
FBgn0037317	38	40	42	58	49	44	33	27	61	45	45	58	94	47	34	52	61	23	28	37
FBgn0041707	72	54	18	54	80	77	62	33	90	56	87	150	120	63	89	36	132	31	25	73
FBgn0001311	77	26	19	39	21	46	18	33	88	59	9	222	25	21	14	33	25	4	30	30
FBgn0037320	1	0	0	3	0	0	3	0	2	0	12	9	23	21	20	22	26	4	3	6
FBgn0011965	0	0	0	0	0	0	0	0	0	0	0	0	0	0	0	0	0	0	0	0
FBgn0264712	138	107	88	136	123	181	166	107	259	132	137	197	293	267	149	242	178	119	88	120
FBgn0037322	1	0	0	0	0	0	0	0	1	0	0	0	0	0	0	0	0	0	0	0
FBgn0037323	41	41	20	0	2	55	22	22	1	2	1	3	0	0	1	0	3	0	5	0
FBgn0037324	0	1	0	3	1	1	1	0	5	0	3	5	3	2	0	6	3	2	1	1
FBgn0037326	16	24	3	24	18	15	3	10	32	17	10	24	20	14	14	21	29	2	4	13
FBgn0037325	0	0	0	3	0	0	0	0	0	0	21	13	42	38	16	29	18	7	2	9
FBgn0037327	328	341	301	426	420	331	310	384	823	616	395	494	531	527	265	1535	538	398	716	506
FBgn0037328	4826	4079	4408	5110	5901	5764	7461	5842	6525	5995	2792	4175	5161	4456	4250	3645	4237	5372	3514	4829
FBgn0037329	293	197	290	305	451	339	371	372	465	357	291	445	626	646	363	369	367	247	189	306
FBgn0037330	409	312	393	473	589	464	569	517	529	457	191	343	468	409	353	166	328	287	289	349
FBgn0011715	127	135	95	141	135	149	146	138	180	139	88	148	182	173	132	119	153	71	99	119
FBgn0266539	0	0	0	0	0	0	0	0	0	0	0	0	0	0	0	0	0	0	0	0
FBgn0025825	0	0	0	0	0	0	0	0	0	0	0	0	0	0	0	0	0	0	0	0
FBgn0037332	183	145	135	165	192	195	202	237	274	192	98	190	208	156	111	166	168	87	151	151
FBgn0015402	122	102	103	162	140	130	90	128	260	175	127	190	189	194	104	184	132	60	70	118
FBgn0051550	263	122	135	237	236	242	217	241	331	269	157	251	283	260	185	181	273	146	161	199
FBgn0051547	35	27	17	68	36	56	27	40	52	55	42	59	16	21	10	12	57	12	120	23
FBgn0010399	16	28	1	19	22	38	12	14	36	15	2	18	17	4	9	23	34	1	1	30
FBgn0010051	347	296	437	603	440	419	343	694	907	769	363	315	388	196	254	340	183	222	503	673
FBgn0264427	0	0	0	2	0	0	0	1	0	0	10	10	12	18	8	13	10	2	1	1
FBgn0037336	293	213	159	243	279	320	197	277	450	343	193	379	382	300	202	259	217	132	152	286
FBgn0014342	57	31	21	57	43	67	37	48	115	65	75	184	188	234	78	120	117	43	41	55
FBgn0086768	176	138	89	204	163	252	244	192	301	198	208	278	364	470	197	268	263	202	140	196
FBgn0037338	46	30	24	44	53	50	39	35	73	40	28	67	60	72	55	50	44	31	23	28
FBgn0037339	174	161	139	175	214	184	159	214	340	217	229	293	346	405	222	475	257	131	174	234
FBgn0263484	0	0	0	0	0	0	0	0	1	0	0	0	0	1	0	0	0	0	2	0
FBgn0267811	0	0	0	0	0	0	0	0	0	0	0	0	0	0	0	0	1	0	0	0
FBgn0037340	127	97	94	112	127	118	171	132	161	114	79	131	123	145	104	80	139	92	124	110
FBgn0037341	294	144	167	203	220	260	325	226	255	220	180	231	188	320	163	206	287	163	231	181
FBgn0037342	112	88	73	128	126	131	121	142	196	128	99	140	191	192	109	100	111	90	61	103
FBgn0041191	354	281	257	379	409	425	409	400	505	378	318	503	527	601	372	436	516	205	259	310
FBgn0023023	63	46	13	40	39	59	34	32	68	44	4	99	45	8	19	30	68	6	16	44
FBgn0037344	366	237	314	396	392	421	337	488	721	491	302	442	568	430	286	479	370	182	281	361
FBgn0286738	0	0	0	0	0	0	0	0	0	0	0	0	0	0	0	0	0	0	0	0
FBgn0037345	28	20	20	22	38	42	35	30	53	35	32	51	76	68	38	42	56	40	27	20
FBgn0014366	219	147	218	217	272	232	200	247	357	254	177	250	342	328	235	242	257	134	137	228
FBgn0283535	3385	1958	1522	2537	2649	3161	3370	2705	3618	3146	2649	4075	2290	4252	1958	1759	4334	1887	4531	1584
FBgn0250753	4279	3148	4033	4439	4400	4142	5048	4781	5261	4694	2693	3920	4712	3646	3496	2420	3690	2216	3141	4285
FBgn0082961	1	0	1	2	2	4	1	6	8	3	3	2	2	2	2	1	3	6	3	2
FBgn0082962	1	0	0	3	3	1	1	2	3	1	0	0	1	0	5	0	2	6	0	2
FBgn0082978	1	4	1	3	4	1	3	1	3	0	0	1	1	1	0	1	3	4	2	1
FBgn0082979	0	0	2	2	0	1	1	0	2	2	0	1	0	1	1	0	0	2	3	1
FBgn0082954	1	2	0	3	3	2	2	0	2	0	3	0	1	0	0	0	0	2	0	1
FBgn0086662	3	8	1	1	5	3	1	6	4	0	7	3	4	0	8	1	2	2	8	4
FBgn0082988	2	7	2	1	3	0	5	2	3	10	0	1	3	1	3	2	4	2	3	5
FBgn0082989	3	1	3	2	0	0	4	5	2	2	1	3	0	0	1	3	0	1	3	4
FBgn0037347	161	134	118	177	158	165	195	150	254	146	149	205	208	274	138	222	197	115	86	141
FBgn0261004	125	99	54	118	103	149	87	103	203	118	130	242	345	399	197	277	160	40	55	99
FBgn0017550	366	263	286	379	420	390	372	425	541	395	257	402	472	450	290	389	383	210	242	348
FBgn0263619	2	0	2	0	2	2	0	0	1	0	3	5	0	2	0	7	3	4	5	0
FBgn0285959	2	3	1	3	1	4	2	6	8	2	5	3	1	14	4	10	7	7	2	2
FBgn0267810	6	0	4	0	2	7	5	3	9	0	1	3	0	3	3	1	6	2	3	8
FBgn0019637	213	135	193	193	238	228	195	222	322	200	120	228	304	259	184	244	174	110	130	209
FBgn0044823	89	36	42	53	37	74	94	53	112	43	47	79	60	122	53	74	86	41	42	45
FBgn0037350	48	28	30	49	26	32	86	37	62	34	29	55	47	59	53	67	50	101	42	64
FBgn0037351	8307	7181	8097	8938	10627	9614	11020	10018	12077	10806	5296	7125	9421	6384	6578	6412	6879	5286	6698	9048
FBgn0260002	2	2	0	0	0	0	1	0	1	0	0	0	0	1	0	0	0	2	0	0
FBgn0086051	0	0	0	0	0	0	0	0	0	0	0	0	0	0	0	0	0	0	0	0
FBgn0051551	2	2	3	10	1	6	0	4	17	3	34	50	82	77	35	40	29	13	8	8
FBgn0051549	110	89	92	110	130	158	117	110	187	139	90	111	112	132	75	155	107	67	92	87
FBgn0037354	987	882	1892	1636	1709	1241	1609	1545	1665	1311	1135	1068	1164	903	846	1107	933	702	950	1015
FBgn0051546	2	1	0	5	2	2	1	6	2	0	36	24	61	54	20	54	32	17	16	5
FBgn0051548	633	466	545	856	902	798	982	887	983	953	890	890	1057	918	998	421	757	693	770	774
FBgn0037356	291	228	252	283	343	289	401	279	363	287	213	375	399	342	231	178	216	188	224	251
FBgn0027951	310	214	213	262	292	355	235	345	517	339	230	360	429	358	222	326	286	155	156	306
FBgn0262125	1579	1272	1484	1748	1971	1570	1693	1965	2667	2209	1408	1593	2000	1388	1440	898	1073	612	1263	1870
FBgn0037358	651	507	469	596	580	783	1076	592	899	580	707	964	694	1270	649	355	855	540	682	749
FBgn0037359	76	41	41	87	103	84	69	72	101	82	68	149	216	262	117	133	146	73	44	65
FBgn0037360	293	229	245	335	338	317	330	371	403	380	262	402	450	505	267	315	286	184	254	286
FBgn0264902	4	1	1	4	3	2	4	3	2	2	2	4	0	0	9	4	4	4	1	7
FBgn0046222	261	159	224	243	276	262	243	258	356	291	162	328	420	395	260	230	186	135	151	236
FBgn0267809	0	0	1	0	0	0	0	0	0	1	5	3	4	4	2	6	8	2	0	0
FBgn0010772	274	200	201	330	306	320	257	276	440	348	272	390	372	406	251	266	314	248	212	314
FBgn0037363	236	187	248	253	253	293	193	430	436	387	221	256	358	223	180	854	244	235	299	398
FBgn0037364	8	8	15	17	8	9	17	8	19	26	7	13	29	20	13	14	15	12	11	15
FBgn0261261	94	76	42	77	87	72	43	65	189	92	55	150	164	130	72	126	106	23	23	76
FBgn0037365	0	1	0	0	0	0	0	0	0	0	9	7	13	2	4	11	13	0	0	2
FBgn0004878	35	65	2	48	59	127	24	11	56	30	0	63	44	0	18	43	81	1	0	44
FBgn0266229	0	0	0	0	0	0	0	0	0	0	1	2	3	4	2	9	3	3	0	3
FBgn0037368	41	40	34	55	39	69	70	32	82	45	43	80	94	83	46	73	72	49	23	55
FBgn0037369	126	111	81	168	167	192	146	137	232	102	138	252	316	394	229	231	210	157	64	125
FBgn0037370	300	253	310	776	597	416	580	546	733	582	660	866	762	755	650	254	377	328	370	603
FBgn0037371	209	132	162	198	215	205	188	225	318	197	153	315	278	295	174	240	210	96	116	196
FBgn0027497	188	144	122	187	191	225	198	185	335	202	187	238	273	273	174	233	177	112	120	174
FBgn0037372	87	71	67	92	93	118	87	106	117	84	55	117	101	111	86	84	94	59	48	61
FBgn0266672	412	309	330	473	499	499	415	456	751	497	410	525	531	611	355	429	419	207	281	429
FBgn0027608	12	24	5	53	23	36	15	25	59	22	147	138	240	220	100	138	102	26	20	67
FBgn0037374	469	456	469	774	687	677	799	661	860	765	560	669	739	673	705	450	690	792	583	821
FBgn0037375	14	7	6	23	15	26	12	11	31	25	81	96	138	141	65	119	58	26	25	37
FBgn0037376	88	117	73	176	121	141	149	98	223	114	136	234	317	314	192	247	227	109	93	141
FBgn0028690	985	589	619	925	868	864	790	873	1355	948	779	1269	1347	1214	927	942	918	464	725	928
FBgn0037377	48	60	46	66	73	59	26	48	89	53	36	75	97	104	55	82	76	41	33	60
FBgn0037378	217	119	154	233	211	220	223	193	320	187	226	369	483	531	303	337	375	207	175	199
FBgn0037379	106	88	73	116	112	100	98	115	178	120	121	159	181	252	108	202	122	70	79	88
FBgn0263353	28	43	14	25	44	46	15	19	70	22	4	39	33	2	16	20	40	7	4	34
FBgn0261561	22	11	7	48	20	52	15	26	69	40	168	220	398	409	174	297	171	74	50	88
FBgn0037382	152	109	109	153	156	169	150	123	247	146	137	193	305	321	193	245	177	93	80	137
FBgn0284081	14	19	16	97	49	15	43	35	99	49	9	22	19	6	15	3	13	5	8	17
FBgn0037383	65	49	61	80	90	81	86	57	104	93	92	111	117	151	89	66	77	46	51	68
FBgn0037384	130	78	55	124	118	107	109	118	168	85	103	188	247	229	124	181	140	78	61	80
FBgn0037385	0	0	0	1	0	0	0	0	3	0	18	15	18	25	15	19	5	2	1	6
FBgn0037386	127	78	110	0	4	165	93	48	285	279	395	62	6	166	1	313	155	26	149	117
FBgn0266702	0	0	1	0	0	0	0	0	0	0	0	0	3	0	0	0	2	0	1	0
FBgn0037387	189	162	98	59	169	205	181	244	134	105	47	322	113	93	54	35	124	37	111	60
FBgn0037388	0	1	0	3	1	0	0	1	1	0	40	36	57	71	43	51	44	5	1	5
FBgn0037389	0	0	0	4	0	0	0	3	4	0	2	11	19	32	8	10	9	7	2	6
FBgn0029088	112	54	41	81	85	71	66	83	155	69	50	111	114	102	59	116	96	42	50	71
FBgn0085316	0	0	0	0	0	0	0	0	0	0	11	9	4	6	16	12	7	0	7	1
FBgn0028436	209	145	167	184	233	202	267	215	224	142	91	182	173	197	133	89	150	131	103	152
FBgn0037391	163	227	95	135	173	197	129	181	574	397	258	288	348	314	220	2602	615	710	748	632
FBgn0267808	4	1	2	4	0	1	2	5	4	5	0	3	0	0	4	1	1	0	1	7
FBgn0083949	19	15	4	14	12	13	11	7	16	6	5	18	18	6	15	11	21	0	5	10
FBgn0267399	0	0	0	0	0	0	0	0	0	0	1	0	1	0	0	0	0	0	0	0
FBgn0267400	0	0	0	0	0	0	0	0	0	0	0	0	0	0	0	0	0	0	0	0
FBgn0040679	2	1	1	11	5	4	3	6	17	5	29	52	91	100	47	50	49	24	8	16
FBgn0266230	0	0	0	0	0	0	0	0	0	0	1	0	0	0	0	0	0	0	0	0
FBgn0266231	0	0	0	0	0	0	0	0	0	0	0	0	0	0	0	0	0	0	0	0
FBgn0284417	0	0	0	0	0	0	0	0	0	0	0	0	0	0	0	0	0	0	0	0
FBgn0011281	0	0	0	0	0	0	0	1	0	0	0	0	0	0	0	0	0	0	1	0
FBgn0010403	2	0	0	2	3	1	1	1	2	1	0	3	11	11	1	1	3	2	0	2
FBgn0266232	0	0	0	0	0	0	0	0	0	0	0	0	0	1	0	0	0	0	0	0
FBgn0266233	0	0	0	0	0	0	0	0	0	1	0	0	0	0	3	2	0	1	0	0
FBgn0003261	3646	3277	4279	4488	5322	4299	4228	5891	7026	5240	1774	2681	2841	2105	2045	4549	2761	2977	2593	3253
FBgn0037395	18	12	5	0	1	12	16	5	1	1	2	3	0	2	0	0	2	0	2	0
FBgn0037396	0	0	0	0	0	0	0	0	0	0	0	4	0	0	0	0	0	0	0	0
FBgn0037397	0	0	0	0	0	0	0	0	0	0	0	0	0	0	0	0	0	0	0	0
FBgn0267941	0	0	0	0	0	0	0	0	0	0	0	0	0	0	0	0	0	0	0	0
FBgn0266226	0	0	0	0	0	0	0	0	0	0	0	0	0	1	0	0	2	1	0	0
FBgn0037398	0	0	0	0	0	1	0	0	1	0	17	10	32	18	21	33	16	6	1	1
FBgn0037399	0	0	0	0	0	0	0	0	0	0	1	1	0	0	0	0	0	1	0	0
FBgn0026077	614	382	69	48	26	152	648	86	67	68	10	383	10	18	10	12	36	6	57	15
FBgn0266234	1	0	3	1	2	0	0	1	3	1	0	0	1	1	0	0	0	1	1	3
FBgn0046878	2574	2542	2336	2436	3153	3267	4444	2747	2633	2147	651	1526	1217	1157	1023	675	1508	1152	1487	1315
FBgn0046876	41	73	80	167	159	112	136	99	157	140	41	52	76	49	49	53	66	66	69	67
FBgn0046875	35	32	5	3	3	47	13	8	6	12	1	144	5	2	2	0	7	4	5	2
FBgn0037402	2	5	1	3	2	1	1	2	14	9	45	72	87	111	51	70	62	20	13	26
FBgn0263497	0	0	0	0	0	0	0	0	0	0	0	0	0	1	0	1	0	0	1	0
FBgn0263498	0	0	0	0	0	0	0	0	0	0	1	0	1	1	0	0	0	0	0	0
FBgn0051559	6	6	5	4	8	2	7	12	14	44	4	4	3	4	0	3	0	0	1	0
FBgn0037405	1	8	7	19	15	11	8	36	59	51	149	259	12	104	11	38	20	9	58	15
FBgn0037406	0	0	0	0	0	0	0	0	0	0	0	0	1	0	0	0	0	2	0	0
FBgn0051562	0	0	1	0	0	0	0	0	0	0	0	0	0	0	0	0	0	1	0	0
FBgn0037408	18	11	1	7	5	14	10	4	3	13	1	10	5	6	5	4	13	4	6	6
FBgn0037409	24	1	0	1	0	1	2	1	2	0	6	16	4	8	4	5	8	2	14	0
FBgn0037410	53	51	25	1	0	158	76	27	1	3	5	3	10	5	2	0	4	0	1	1
FBgn0037411	0	0	0	0	0	0	0	0	0	1	0	0	1	0	0	0	0	0	0	0
FBgn0037412	0	0	0	0	0	0	0	0	0	1	0	0	0	0	0	0	0	0	0	0
FBgn0037413	3	0	0	0	0	0	0	1	0	0	0	0	2	2	0	0	0	0	0	0
FBgn0027527	1410	48	5	2	0	513	88	0	0	0	2	5	5	18	5	6	5	0	0	2
FBgn0037414	782	67	1	0	2	15	181	0	0	0	1	0	0	0	0	0	0	0	0	0
FBgn0037415	1	0	0	0	0	0	0	0	0	0	0	0	0	1	0	0	0	0	0	0
FBgn0037416	1138	231	19	2	2	120	802	14	3	3	1	2	0	3	1	2	1	1	0	1
FBgn0037417	2	0	0	0	0	0	0	0	0	0	0	0	0	0	0	0	1	1	0	0
FBgn0037418	0	0	0	0	0	0	0	0	0	0	0	0	1	5	0	1	0	0	0	0
FBgn0037419	0	0	0	2	0	0	3	0	0	0	8	0	3	6	0	2	2	2	0	0
FBgn0037420	0	0	4	3	9	41	1	3	37	64	1	942	5	0	0	1	0	0	0	0
FBgn0037421	0	0	0	0	0	0	0	0	0	0	0	0	0	0	0	0	0	0	0	0
FBgn0037422	1	0	0	0	1	2	0	0	0	1	0	0	0	0	0	0	0	0	0	0
FBgn0040279	408	59	29	4	3	473	139	4	3	0	1	3	1	1	0	0	3	0	4	2
FBgn0037424	1769	673	196	0	0	455	724	54	0	1	0	0	0	0	0	0	2	1	0	0
FBgn0286874	1	0	0	0	0	0	3	0	0	0	0	0	0	0	0	0	0	0	0	0
FBgn0051561	0	0	0	0	0	0	1	0	0	0	0	0	0	0	0	0	0	0	0	0
FBgn0267690	2	0	0	0	0	0	2	0	0	1	0	0	0	0	0	0	0	0	0	0
FBgn0051560	0	0	0	0	0	0	0	0	0	0	0	0	0	0	0	0	0	0	0	0
FBgn0037427	44	2	0	1	0	0	3	0	0	0	2	5	7	2	1	4	1	0	0	1
FBgn0037428	831	85	23	0	0	29	541	1	0	0	1	0	0	0	0	0	0	0	0	0
FBgn0037429	1087	225	48	0	8	78	1050	11	0	1	2	0	0	0	0	0	0	0	0	0
FBgn0037430	1393	342	87	1	1	210	1056	25	1	0	3	0	0	2	0	0	0	0	0	0
FBgn0037431	0	0	0	0	0	1	2	2	0	0	0	0	0	0	0	0	0	0	0	0
FBgn0037432	1	1	1	6	2	3	0	3	9	0	46	61	117	129	55	90	65	13	10	27
FBgn0037433	17	8	4	10	7	8	11	5	4	20	3	69	5	24	3	1	18	4	16	5
FBgn0261789	316	284	288	371	415	430	382	355	462	307	188	393	370	436	304	242	409	241	229	289
FBgn0037435	46	32	54	63	65	52	72	46	77	51	26	65	50	73	43	56	63	31	34	36
FBgn0037436	1	0	0	0	0	0	0	0	0	0	0	0	2	6	0	0	0	0	0	0
FBgn0267698	332	267	174	312	297	299	274	294	637	672	211	262	399	305	165	744	215	448	177	234
FBgn0261641	290	187	214	338	327	346	279	330	446	393	225	342	340	363	235	326	386	239	251	284
FBgn0037439	276	221	388	472	438	326	318	472	574	515	101	246	285	227	214	259	244	163	209	325
FBgn0037440	527	397	392	547	554	703	687	625	895	706	791	728	730	733	691	229	552	271	501	780
FBgn0260766	2	0	1	3	3	5	2	4	7	5	5	5	7	7	3	4	6	3	2	4
FBgn0261006	0	0	0	0	0	0	0	0	0	0	0	0	0	0	0	0	0	0	0	0
FBgn0027514	91	46	39	70	57	95	47	57	126	69	65	92	130	119	66	101	93	34	23	55
FBgn0260645	0	0	0	0	0	0	0	1	0	0	1	0	0	0	0	1	0	0	0	0
FBgn0010282	400	358	374	490	489	478	457	456	793	570	431	660	876	654	590	516	448	242	372	590
FBgn0037442	259	200	202	246	262	306	277	322	418	322	269	367	449	418	238	399	281	158	211	286
FBgn0037443	576	289	359	390	295	315	481	440	811	482	156	444	449	272	255	166	246	237	253	336
FBgn0264495	328	187	240	265	264	331	196	334	611	361	336	478	804	593	317	577	338	146	148	337
FBgn0264787	0	0	0	0	0	0	0	0	2	0	0	2	2	3	1	2	2	0	0	0
FBgn0037445	294	172	203	260	259	282	210	309	439	310	210	332	456	318	185	262	197	124	139	198
FBgn0283558	0	0	0	0	0	0	0	0	0	0	0	0	0	0	0	0	0	0	0	0
FBgn0037446	140	98	100	132	153	182	132	140	278	155	119	202	275	316	150	209	200	105	63	144
FBgn0037447	57	24	20	14	12	70	52	20	54	55	12	254	6	17	12	7	39	5	55	11
FBgn0037448	5	0	4	0	5	9	4	0	3	8	3	6	7	4	3	5	5	2	4	3
FBgn0011919	0	0	0	0	0	0	0	0	0	0	0	0	0	0	0	0	0	0	0	0
FBgn0037449	51	16	10	23	28	45	34	37	44	44	21	64	68	79	33	58	35	23	7	9
FBgn0053202	13	27	9	13	16	19	15	12	40	20	2	25	14	6	15	11	34	2	0	23
FBgn0046873	0	0	0	1	0	1	2	0	0	0	21	18	34	50	17	39	23	8	3	4
FBgn0267807	0	0	0	0	0	0	0	0	0	0	0	1	0	1	0	0	1	0	0	0
FBgn0037454	0	0	0	4	3	8	2	0	12	5	97	85	180	237	118	156	91	37	12	35
FBgn0037455	0	0	0	0	1	0	0	0	0	1	28	24	53	45	25	41	23	5	4	11
FBgn0267806	0	0	0	0	0	0	0	0	0	0	0	2	0	0	0	0	0	0	0	0
FBgn0037456	1	1	0	2	3	4	1	1	12	3	19	30	39	43	17	55	38	6	5	13
FBgn0051482	2	2	0	9	0	1	0	1	6	7	66	58	87	156	80	88	81	24	10	24
FBgn0250846	11	8	6	21	11	28	14	11	62	25	82	141	185	265	105	129	114	55	17	43
FBgn0037460	6	1	1	14	6	9	3	6	24	8	97	102	224	279	124	168	161	55	17	37
FBgn0037461	10	3	4	32	20	26	13	17	59	23	138	209	301	374	160	245	196	71	22	70
FBgn0037462	0	0	0	0	0	0	0	0	0	0	6	4	7	7	1	3	3	1	0	0
FBgn0051286	1	0	1	6	1	3	0	0	2	0	54	56	113	137	44	84	57	19	6	26
FBgn0026565	258	91	92	44	47	133	238	77	99	64	53	106	29	167	17	5	197	16	103	71
FBgn0010355	345	235	330	339	429	423	284	500	714	524	273	461	485	398	274	474	302	153	285	378
FBgn0026566	295	249	224	269	399	416	393	306	474	317	223	319	432	486	321	253	319	231	189	278
FBgn0262801	1113	1101	906	1599	1471	1671	1870	1301	2067	1610	1857	1711	2047	1855	1813	831	1664	1175	1162	1855
FBgn0024912	13	17	6	13	11	20	18	12	14	4	1	21	17	18	4	36	20	13	11	6
FBgn0002522	7	1	2	2	0	1	0	2	3	1	2	9	10	19	2	6	9	3	1	3
FBgn0000552	0	0	0	0	0	0	0	0	0	0	1	1	0	0	0	0	1	0	0	0
FBgn0004777	79	796	763	52	1305	1484	278	1088	625	670	25	96	14	32	38	10	13	10	9	24
FBgn0004778	16	15	10	0	12	16	8	13	4	4	0	0	0	0	0	1	0	0	0	0
FBgn0004779	21	848	867	5	1456	1990	423	1129	530	410	0	1	0	1	1	0	0	0	0	0
FBgn0004780	18	130	215	3	167	356	17	365	38	73	3	61	0	0	0	1	0	0	1	0
FBgn0004781	36	0	2	0	0	0	0	0	0	0	0	8	0	0	0	1	0	2	0	0
FBgn0063127	5	17	0	19	11	15	4	5	32	24	1	18	34	1	15	116	22	117	0	30
FBgn0004782	1	16	48	11	39	41	0	74	29	33	3	145	0	0	2	2	0	0	2	0
FBgn0004783	1	18	35	0	28	71	0	70	16	39	0	100	0	1	0	0	0	0	0	0
FBgn0051481	0	2	0	4	0	3	0	0	1	0	1	3	3	4	3	2	3	0	2	1
FBgn0004054	0	0	0	0	0	0	0	0	0	0	0	0	0	0	0	0	0	0	0	0
FBgn0085326	0	0	0	1	0	1	0	0	0	0	0	0	0	0	0	0	0	0	0	0
FBgn0004053	0	0	0	1	0	1	0	0	0	0	0	1	0	1	0	1	0	0	0	0
FBgn0000166	0	0	1	2	0	0	0	0	0	1	0	1	0	0	0	0	0	0	0	0
FBgn0267153	0	0	1	0	1	4	1	0	3	1	1	5	1	2	0	3	2	0	4	2
FBgn0000071	25	22	2	40	34	51	13	12	58	12	7	53	29	6	24	20	56	5	2	44
FBgn0266235	0	0	0	0	0	0	0	0	0	1	0	0	0	0	0	0	0	0	0	0
FBgn0261638	0	0	0	0	0	1	0	0	2	0	0	0	0	0	0	0	1	0	0	0
FBgn0262174	0	0	0	0	0	0	0	0	0	0	0	0	0	0	0	0	0	0	0	0
FBgn0263383	3	0	0	3	0	7	0	5	9	4	9	2	13	9	3	7	1	3	1	3
FBgn0000439	1	0	0	1	1	0	0	0	2	0	1	10	0	4	2	1	3	1	0	0
FBgn0261503	0	1	0	0	0	0	0	1	1	0	0	2	3	0	0	1	0	0	1	0
FBgn0262424	0	0	0	0	0	0	0	0	0	0	0	0	0	0	0	0	0	0	0	0
FBgn0267575	0	0	0	0	0	0	2	0	0	0	0	0	0	2	1	0	0	0	0	0
FBgn0051485	0	1	0	0	0	0	2	0	0	0	0	1	0	0	0	0	0	0	0	0
FBgn0026162	0	0	0	0	0	0	0	0	0	0	0	0	0	0	0	0	0	0	0	0
FBgn0261504	0	1	0	0	0	2	0	0	0	0	0	1	0	0	0	1	1	0	0	0
FBgn0026163	0	0	0	0	0	0	0	0	0	0	0	0	0	0	0	0	0	0	0	0
FBgn0026164	0	0	0	0	0	0	0	0	0	0	0	0	0	0	0	0	0	0	0	0
FBgn0000003	0	0	0	0	0	0	0	0	0	0	0	0	1	0	0	0	1	0	0	1
FBgn0011904	0	0	0	0	0	0	0	0	0	0	0	0	0	0	0	0	0	0	0	0
FBgn0003339	3	8	2	3	5	8	2	0	5	2	0	8	10	2	5	3	2	2	3	10
FBgn0267561	0	0	0	1	0	0	0	0	0	0	2	1	3	3	1	0	1	0	0	1
FBgn0267562	0	0	0	0	0	0	0	0	0	0	0	0	0	0	0	0	0	0	0	0
FBgn0267563	0	0	0	0	0	0	0	0	0	0	0	0	0	0	0	0	0	0	0	0
FBgn0267564	0	0	0	0	0	0	0	0	0	0	0	0	0	0	0	0	0	0	0	0
FBgn0267565	0	0	0	0	0	0	0	0	0	0	0	0	0	0	0	0	0	0	0	0
FBgn0267560	0	0	0	0	0	0	0	0	0	0	0	0	0	0	1	0	0	0	0	0
FBgn0001077	0	0	0	0	0	0	0	1	0	0	3	1	5	2	2	3	3	0	1	0
FBgn0266236	0	0	0	0	0	0	0	0	0	0	0	0	0	0	1	0	0	0	0	0
FBgn0267119	0	2	0	0	0	1	0	0	0	0	1	2	0	4	1	1	1	0	1	1
FBgn0266237	1	1	0	1	3	3	7	2	1	3	3	7	2	10	0	2	4	4	2	3
FBgn0260642	105	83	153	135	135	126	118	204	211	171	90	137	91	53	84	49	57	49	56	134
FBgn0262897	1	0	0	4	0	0	0	2	1	4	2	3	0	2	2	0	0	0	1	2
FBgn0267559	0	0	0	0	0	0	0	0	0	0	0	0	0	0	0	0	0	1	0	0
FBgn0266238	0	0	0	0	0	0	0	0	0	0	0	1	0	0	1	0	0	0	0	0
FBgn0024289	1516	1897	1541	1111	1348	2538	2290	1833	1312	875	222	114	551	325	205	1779	540	494	730	425
FBgn0026563	26	64	81	24	31	124	24	144	46	42	146	181	310	265	153	779	218	233	118	104
FBgn0019828	7	7	2	35	5	24	13	6	71	24	266	357	581	746	351	510	432	194	67	139
FBgn0037463	15	11	14	52	18	33	21	20	75	27	124	176	317	443	162	216	228	101	26	63
FBgn0037464	34	7	9	76	25	53	28	24	107	32	167	254	409	550	245	324	280	107	59	110
FBgn0037465	286	200	221	296	280	252	233	336	459	292	169	300	390	239	275	390	271	144	199	240
FBgn0037466	140	84	77	120	122	154	128	153	198	142	102	149	144	105	110	97	128	88	84	89
FBgn0037467	287	259	322	439	455	335	338	509	597	512	295	454	487	432	331	254	372	159	370	400
FBgn0267568	1	0	1	1	3	2	0	1	1	0	1	4	1	1	0	0	0	0	0	0
FBgn0037468	635	553	415	1226	1269	660	1087	850	1613	1176	754	1235	843	1003	854	372	810	475	425	634
FBgn0010774	796	590	634	939	910	917	876	911	1407	954	640	935	1253	1064	747	940	897	526	491	798
FBgn0037469	115	73	70	116	120	194	131	114	205	153	138	181	218	256	155	157	169	88	86	117
FBgn0037470	317	278	270	314	350	393	376	343	401	358	258	292	329	327	325	345	329	271	278	325
FBgn0267567	7	4	2	12	5	5	10	7	5	2	1	3	0	6	4	2	10	2	2	8
FBgn0003884	9379	6824	6001	10434	9344	10441	11762	8746	13881	9807	9246	14190	15317	16435	10874	6835	11822	6657	8075	10293
FBgn0263768	39	47	26	48	57	70	50	50	81	41	51	114	93	117	75	90	112	44	30	47
FBgn0040670	10	7	4	18	6	17	12	10	29	9	31	41	79	105	45	44	39	17	8	23
FBgn0261238	115	108	56	94	109	125	65	157	191	196	91	153	184	116	107	208	100	286	43	97
FBgn0267566	0	0	0	0	0	0	0	0	0	0	0	0	0	0	0	0	0	0	0	0
FBgn0014863	307	62	47	21	65	165	119	90	186	105	32	1220	23	61	17	15	120	34	202	26
FBgn0037472	49	50	27	77	74	92	62	43	113	61	62	95	108	85	65	98	103	35	34	55
FBgn0037473	187	128	122	191	203	189	247	200	258	203	93	149	162	177	114	191	202	125	173	171
FBgn0262149	20	17	11	31	15	26	36	11	34	20	20	41	52	94	36	42	59	29	11	17
FBgn0051248	153	119	111	224	145	115	231	163	253	189	54	101	170	83	157	27	87	73	65	160
FBgn0051494	0	0	1	3	0	0	0	0	0	0	0	0	2	0	0	1	0	0	0	0
FBgn0051491	0	0	0	0	0	0	0	0	0	0	0	0	0	0	0	0	0	0	0	0
FBgn0051493	0	1	0	1	0	1	1	0	0	0	0	0	0	0	0	0	1	2	0	0
FBgn0037475	3	3	0	5	5	10	5	4	9	2	2	5	3	6	5	7	9	0	0	3
FBgn0261702	0	0	0	1	1	0	0	1	0	0	3	3	5	7	2	4	1	3	0	0
FBgn0037477	3	15	0	1	8	56	1	3	13	42	0	1	2	4	4	147	26	78	22	32
FBgn0037478	82	74	60	78	110	127	94	83	132	89	50	80	123	119	67	83	109	74	50	87
FBgn0250732	117	110	119	166	163	243	115	166	274	209	139	230	185	184	121	188	137	70	80	141
FBgn0011020	58	25	24	42	48	72	49	46	107	45	42	72	115	98	47	62	76	42	30	46
FBgn0037481	40	22	20	52	57	40	39	35	68	39	22	54	81	81	37	43	50	19	17	25
FBgn0267569	1	0	0	0	0	0	0	0	0	0	0	5	0	0	0	0	0	0	0	0
FBgn0002306	177	66	55	91	116	188	80	108	233	137	107	373	256	264	109	150	121	23	90	100
FBgn0037482	186	134	157	176	182	187	156	211	381	206	184	287	443	424	274	346	230	127	124	186
FBgn0086372	362	339	252	323	327	346	384	399	516	437	267	438	483	410	301	320	424	193	252	410
FBgn0037483	7	2	1	4	0	3	4	1	10	2	30	47	93	133	55	92	75	23	16	34
FBgn0250845	20	10	13	70	19	43	7	18	105	33	211	277	483	521	235	427	356	122	64	114
FBgn0037485	254	49	29	92	105	92	157	156	106	129	91	119	136	82	110	55	172	94	136	12
FBgn0037486	4	2	0	5	1	4	0	0	12	1	71	75	115	149	65	111	53	36	21	31
FBgn0037487	4	0	2	2	0	3	42	3	3	7	1	91	5	1	5	6	7	2	9	3
FBgn0037488	0	0	0	0	0	0	0	0	0	0	0	0	0	0	0	0	0	0	0	0
FBgn0037489	234	180	282	286	280	248	234	324	392	254	111	237	250	209	151	255	197	116	150	219
FBgn0037490	28	23	19	31	35	28	34	34	61	35	40	54	90	81	42	75	47	29	25	50
FBgn0037491	119	113	172	234	223	158	189	222	194	166	107	165	157	125	151	95	141	77	105	154
FBgn0037492	66	70	65	131	83	103	109	109	137	104	70	86	92	98	66	51	63	59	69	86
FBgn0011282	0	0	0	0	0	0	0	0	1	0	1	0	0	0	0	0	0	0	0	0
FBgn0001112	3	3	2	1	1	7	5	3	7	5	3	106	3	4	3	5	1	5	7	2
FBgn0265426	0	0	0	0	0	0	0	1	0	0	0	0	0	0	0	0	0	0	0	1
FBgn0028400	38	123	5	46	48	208	20	78	277	210	9	42	62	18	34	126	108	43	67	65
FBgn0037493	0	0	0	0	0	0	0	0	0	0	0	0	0	0	0	0	0	0	0	0
FBgn0267337	0	1	0	10	6	7	0	1	21	5	1	13	11	1	7	10	12	1	1	9
FBgn0265421	0	0	0	0	0	0	0	0	0	0	0	0	2	0	0	0	0	0	0	0
FBgn0045843	0	0	0	2	3	6	1	0	0	3	12	19	31	21	13	22	23	11	3	12
FBgn0260713	0	0	0	0	0	0	0	0	0	0	0	0	0	0	0	0	0	0	0	0
FBgn0265422	0	0	0	0	0	0	0	0	0	0	0	0	0	0	0	0	0	0	0	0
FBgn0267805	0	0	0	0	0	0	0	0	0	0	0	0	0	0	0	0	0	0	0	0
FBgn0037498	0	0	0	0	0	0	0	0	0	0	0	0	0	0	0	0	0	0	0	0
FBgn0283626	0	0	0	0	0	0	0	0	0	0	0	0	0	0	0	0	0	0	0	0
FBgn0267944	0	0	1	0	0	0	0	0	0	0	0	0	0	0	0	0	0	0	0	0
FBgn0265423	0	0	0	0	0	2	0	0	0	0	3	12	17	11	7	6	2	1	0	1
FBgn0265424	0	0	0	0	0	0	0	0	0	0	0	0	0	0	0	0	0	0	0	0
FBgn0265425	0	0	0	0	0	0	0	0	0	0	4	3	2	1	1	3	3	1	0	1
FBgn0051496	52	104	91	110	88	126	120	124	108	156	267	68	290	133	259	158	186	184	127	272
FBgn0051501	0	0	0	0	0	0	0	0	4	0	29	26	26	76	28	46	29	11	3	14
FBgn0262982	2	0	0	13	3	7	1	3	18	6	29	55	92	100	45	63	62	23	9	20
FBgn0037500	0	1	0	1	0	3	0	0	3	2	28	18	41	64	30	36	26	11	3	11
FBgn0004175	5	5	3	26	7	21	4	6	29	16	86	99	190	204	93	149	99	47	12	32
FBgn0004174	10	9	3	36	8	41	6	10	56	14	175	146	321	399	147	261	194	81	25	56
FBgn0004173	11	11	9	38	15	55	18	5	74	20	157	203	395	446	181	265	188	97	28	60
FBgn0004172	9	4	6	41	31	39	15	11	62	25	141	232	347	430	173	239	206	105	38	62
FBgn0015770	0	0	0	0	0	0	0	0	1	0	0	0	0	0	0	1	0	0	0	0
FBgn0267120	0	0	0	0	0	0	0	0	0	0	0	0	1	0	0	0	0	0	0	0
FBgn0261502	0	0	0	6	1	0	0	0	4	4	26	28	48	69	40	31	38	19	4	11
FBgn0037501	0	0	0	1	0	1	0	0	0	0	0	0	0	0	0	0	0	1	0	1
FBgn0283627	0	0	0	0	0	0	0	0	0	0	1	0	0	3	0	1	0	0	0	0
FBgn0037502	4	2	1	18	6	5	1	3	12	7	91	118	203	217	99	98	71	28	11	20
FBgn0037503	2	2	2	2	0	3	5	2	19	7	0	52	2	3	0	1	0	0	0	0
FBgn0011999	0	0	0	0	0	0	0	0	0	0	0	0	0	0	0	0	0	0	0	0
FBgn0263565	0	0	0	0	0	0	0	0	0	0	0	0	0	0	0	0	0	0	0	0
FBgn0011998	0	0	0	0	0	0	0	0	0	0	0	0	0	0	0	0	0	0	0	0
FBgn0266239	0	0	0	0	0	0	0	0	0	0	0	2	9	4	0	1	2	1	1	0
FBgn0012000	0	0	0	0	0	0	0	0	0	0	0	0	0	0	0	0	0	0	0	0
FBgn0037504	175	144	151	191	218	163	207	174	208	147	85	206	194	166	136	174	203	128	121	136
FBgn0043853	0	1	0	2	3	1	0	6	1	3	0	2	0	0	0	7	1	2	5	1
FBgn0065099	2	3	3	4	2	1	6	0	3	3	4	6	6	6	0	6	5	9	2	4
FBgn0012001	0	0	0	0	0	0	0	0	0	0	0	0	0	0	0	0	0	0	0	0
FBgn0015569	186	116	88	201	144	147	194	138	336	222	215	251	205	217	207	108	208	50	186	220
FBgn0261508	1	0	0	0	1	3	7	0	1	6	4	20	1	28	0	0	50	11	41	0
FBgn0015577	253	194	234	239	337	249	275	486	419	285	106	260	285	74	152	80	147	79	110	157
FBgn0037506	0	1	0	3	0	1	0	1	4	4	38	38	69	90	45	89	47	9	7	17
FBgn0015576	243	343	375	256	462	417	305	719	368	675	382	268	237	238	175	76	134	75	275	292
FBgn0017456	1	4	11	18	6	18	14	16	23	7	48	61	107	123	42	73	42	27	9	27
FBgn0015575	2437	1904	1887	1688	2304	2372	2741	2571	2428	1995	1003	863	1414	667	1125	672	792	669	1182	1505
FBgn0015574	12	7	4	40	25	28	13	14	59	21	61	101	195	212	95	111	79	34	16	47
FBgn0027934	91	24	39	114	75	95	100	64	31	96	62	101	49	102	44	21	95	111	95	11
FBgn0015831	4	2	3	20	3	14	1	5	29	8	104	112	197	274	113	145	138	42	23	35
FBgn0003885	783	600	637	828	905	928	875	906	1183	896	414	656	959	803	550	542	632	366	478	724
FBgn0261393	437	300	265	154	258	405	444	407	301	235	239	271	168	293	155	130	269	99	243	159
FBgn0015572	134	121	74	15	43	157	183	76	187	110	148	129	46	281	13	20	245	18	141	95
FBgn0267803	5	2	5	4	1	5	5	2	2	6	2	5	2	7	2	5	4	2	10	3
FBgn0015571	171	48	59	131	122	193	164	117	149	137	259	253	285	356	192	222	270	131	187	80
FBgn0015570	483	410	467	849	658	525	718	734	601	693	538	689	588	302	588	345	481	274	581	631
FBgn0267804	0	1	3	1	0	0	6	0	0	0	0	1	0	2	1	0	0	0	0	0
FBgn0015568	873	731	756	988	909	1053	1218	865	955	854	706	566	736	594	636	798	617	765	762	707
FBgn0267105	0	0	0	0	0	0	0	0	0	0	0	0	0	0	0	0	0	0	0	0
FBgn0083963	14	22	5	15	11	13	0	2	24	12	6	26	26	17	10	44	16	47	1	8
FBgn0265420	0	0	0	0	0	0	0	0	0	0	0	1	2	4	2	0	1	1	1	0
FBgn0051146	3	5	2	3	3	4	3	4	9	3	1	32	5	8	3	11	2	7	4	3
FBgn0265200	0	0	0	0	0	0	0	0	0	0	0	0	0	0	0	0	0	0	0	0
FBgn0037512	31	13	13	28	10	18	13	20	39	15	37	83	115	140	69	66	61	23	10	39
FBgn0262899	0	0	0	0	0	0	0	0	0	0	0	0	0	0	0	0	0	0	0	0
FBgn0266240	0	0	0	0	0	0	0	0	0	0	0	0	0	0	0	0	0	0	0	0
FBgn0037513	451	463	387	392	553	643	628	522	447	441	261	351	227	274	298	344	383	254	394	320
FBgn0037514	3	2	0	9	4	1	0	3	12	2	55	78	108	187	67	109	80	29	12	31
FBgn0037515	339	218	374	326	510	394	496	491	370	319	165	228	319	183	259	187	228	196	217	241
FBgn0037516	0	0	0	0	0	0	0	0	2	0	6	6	13	10	8	8	18	3	5	2
FBgn0267945	0	0	0	0	0	0	0	0	0	0	0	0	0	1	0	0	2	0	0	0
FBgn0267946	0	0	0	0	0	0	0	0	0	0	0	0	0	0	0	0	0	0	0	0
FBgn0042104	71	59	53	51	76	95	82	110	99	130	61	76	41	89	25	56	105	41	72	54
FBgn0042102	29	17	24	20	46	67	51	32	68	71	42	50	21	75	15	15	69	11	53	10
FBgn0042105	23	13	6	1	9	27	17	10	18	30	19	25	2	42	0	3	16	1	51	6
FBgn0042103	9	7	6	6	10	14	6	7	10	13	13	10	4	14	8	5	14	6	20	0
FBgn0037517	196	58	74	104	132	170	192	106	124	168	174	121	72	214	100	76	129	92	152	27
FBgn0037518	52	34	33	64	55	49	49	86	55	65	44	35	33	46	26	44	46	51	59	39
FBgn0042101	15	11	20	1	5	13	46	19	36	11	21	22	3	30	3	0	39	0	8	10
FBgn0037519	25	7	13	32	25	33	30	36	21	41	22	27	13	46	23	10	20	35	15	8
FBgn0037520	27	5	11	51	21	29	41	36	10	41	31	42	17	38	17	10	20	29	22	4
FBgn0037521	16	22	7	19	19	40	16	10	32	19	2	24	32	4	15	8	34	2	0	12
FBgn0051472	191	127	149	209	201	208	269	193	247	187	183	254	264	270	213	140	251	142	175	176
FBgn0051473	12	14	7	49	18	28	20	12	37	25	64	110	214	259	121	131	107	63	25	45
FBgn0085413	30	30	11	35	23	54	12	22	61	29	20	45	64	58	31	33	48	14	12	26
FBgn0037525	84	100	33	75	58	114	57	40	126	77	19	94	88	27	55	44	142	32	16	114
FBgn0267802	0	0	0	0	1	0	0	0	0	0	0	0	0	3	0	1	0	0	0	0
FBgn0037526	68	52	52	67	96	83	86	81	112	73	36	62	88	64	64	51	71	33	50	53
FBgn0037529	721	495	602	722	832	707	863	760	881	658	376	652	716	568	517	376	607	452	487	631
FBgn0260005	135	61	33	118	130	102	109	120	187	194	74	118	122	55	67	107	146	65	138	42
FBgn0037530	1131	748	1119	1110	1321	1179	1013	1344	1680	1350	797	1142	1364	1201	774	1042	1045	442	911	1081
FBgn0024909	65	35	43	83	77	79	63	62	117	70	44	87	78	116	55	81	66	36	43	81
FBgn0004901	202	162	216	234	314	203	249	309	372	288	125	193	187	119	118	97	177	128	153	203
FBgn0014930	309	297	282	441	441	354	489	443	569	407	303	361	457	362	407	378	402	343	357	474
FBgn0014931	50	47	33	42	46	57	62	61	73	40	34	38	42	46	22	59	23	28	33	34
FBgn0037531	28	13	14	31	37	42	20	35	54	34	29	50	61	76	44	76	39	19	16	22
FBgn0002542	111	99	72	115	110	131	94	133	252	107	125	268	345	340	172	243	187	67	76	164
FBgn0261453	0	0	0	0	0	0	0	0	0	0	0	0	0	0	0	0	0	0	0	0
FBgn0000504	40	31	40	86	85	59	53	77	151	141	69	82	81	43	58	52	53	53	65	104
FBgn0037533	1474	1052	1642	1449	2171	1580	1577	2506	2156	1815	691	1317	1492	800	789	1280	1269	737	1330	1331
FBgn0010401	0	0	0	0	0	0	0	1	0	0	0	3	0	0	0	0	0	0	2	0
FBgn0259974	0	0	0	0	0	0	0	0	0	0	0	0	0	0	0	0	0	0	0	0
FBgn0037534	71	13	8	17	8	22	38	5	11	11	6	52	9	27	12	11	47	2	20	11
FBgn0267818	0	0	0	0	0	0	0	0	0	0	0	0	1	0	0	0	0	0	0	0
FBgn0267817	0	0	0	0	0	0	0	0	0	0	1	0	0	5	0	1	2	0	0	0
FBgn0037535	67	43	37	72	53	87	97	62	111	65	41	107	105	114	58	80	121	63	60	48
FBgn0266598	15	12	10	26	26	39	23	12	22	16	14	31	24	35	13	26	34	11	13	13
FBgn0037536	300	247	238	376	371	357	285	330	595	369	248	483	466	427	286	691	461	295	353	338
FBgn0037537	293	315	260	598	417	415	465	465	723	586	480	529	586	386	604	465	424	255	448	638
FBgn0040524	29	11	9	38	24	47	22	32	68	41	56	105	125	189	68	80	111	47	11	35
FBgn0037538	125	71	82	115	121	117	84	104	198	139	117	197	245	260	156	180	189	94	59	109
FBgn0037539	143	72	80	105	124	120	122	121	186	122	128	185	213	253	123	180	136	62	86	101
FBgn0037540	21	20	7	22	22	24	29	19	47	19	12	30	30	39	25	25	33	15	22	17
FBgn0037541	393	247	328	404	411	423	362	513	598	475	221	358	284	231	184	298	217	180	291	366
FBgn0001255	5	4	2	5	7	9	15	1	16	0	13	19	9	15	8	4	6	5	3	3
FBgn0037543	150	94	157	180	181	192	199	183	228	142	95	145	195	163	147	159	162	118	119	163
FBgn0037544	70	37	45	68	51	67	69	69	64	61	47	74	70	72	53	42	78	46	52	50
FBgn0010812	132	114	94	131	128	159	117	151	282	170	120	219	227	257	126	133	168	93	107	118
FBgn0266241	0	0	0	0	0	0	0	0	0	0	1	1	0	0	0	0	0	0	0	0
FBgn0262362	0	0	0	2	0	0	1	0	0	0	0	0	1	1	1	1	2	1	0	1
FBgn0263596	0	0	0	0	0	0	0	0	0	0	0	0	0	0	0	0	0	0	0	0
FBgn0262363	0	0	0	0	0	0	0	0	1	0	0	0	0	0	0	0	0	0	0	0
FBgn0037546	1	9	1	5	6	9	6	3	13	1	0	11	9	0	1	6	5	0	0	5
FBgn0086052	0	0	0	0	0	0	0	0	0	0	0	0	0	0	0	0	0	0	0	0
FBgn0037547	7	2	1	12	4	17	15	2	22	5	36	66	93	108	62	100	54	11	19	16
FBgn0265418	35	30	14	48	37	44	32	38	55	26	40	77	106	144	47	45	67	42	10	24
FBgn0037548	237	170	195	307	330	287	380	272	234	244	225	212	247	214	277	115	245	176	205	289
FBgn0243512	74	72	50	89	68	132	81	95	169	158	113	120	153	139	59	157	125	68	90	75
FBgn0265419	2	0	1	2	0	4	2	2	0	0	1	3	1	1	0	0	2	1	0	1
FBgn0037549	262	217	175	324	303	397	206	335	632	341	234	372	412	378	265	287	329	153	211	265
FBgn0037550	106	110	89	83	110	99	134	115	121	99	66	136	156	138	124	58	118	91	74	94
FBgn0037551	151	164	135	173	184	211	203	176	264	225	161	228	240	222	155	221	202	121	140	214
FBgn0051583	0	0	0	0	0	0	0	0	0	0	0	0	0	0	0	0	0	0	0	0
FBgn0011963	0	0	0	0	0	0	0	0	0	0	0	0	0	0	0	0	0	0	0	0
FBgn0011962	0	0	0	0	0	0	0	0	0	0	0	0	0	0	0	0	0	0	0	0
FBgn0011961	0	0	0	0	0	0	0	0	0	0	0	0	0	0	0	0	0	0	0	0
FBgn0011960	0	0	0	0	0	0	0	0	0	0	0	0	0	0	0	0	0	0	0	0
FBgn0011959	0	0	0	0	0	0	0	0	0	0	0	0	2	0	0	0	0	0	0	0
FBgn0001138	20	10	2	5	11	16	5	10	15	42	1	18	4	3	4	12	14	1	10	12
FBgn0262994	0	0	0	0	0	0	0	0	0	0	0	0	0	0	0	0	0	0	0	0
FBgn0262995	0	0	0	0	0	0	0	0	0	0	1	1	2	0	1	2	0	1	0	0
FBgn0261290	0	0	0	0	0	0	0	0	0	0	0	0	0	2	0	0	0	0	0	0
FBgn0037552	321	303	337	432	473	416	475	431	530	421	221	306	302	210	271	219	344	187	350	357
FBgn0037553	34	61	54	84	59	68	75	54	62	48	69	37	43	40	73	79	74	44	93	107
FBgn0267111	0	0	0	0	0	0	0	0	2	0	0	1	0	0	0	1	0	0	0	0
FBgn0267110	0	0	0	0	0	0	0	0	0	0	1	2	2	3	1	3	3	1	0	0
FBgn0267109	2	0	0	3	1	1	2	0	1	1	2	9	3	8	2	9	7	3	1	0
FBgn0037554	70	62	39	87	83	73	79	68	171	100	88	124	192	199	105	237	147	96	59	84
FBgn0037555	112	74	67	117	115	128	135	100	202	121	89	131	167	161	92	193	129	91	82	99
FBgn0037556	83	60	39	101	95	149	78	113	222	115	113	196	273	250	119	169	162	67	67	110
FBgn0042182	0	0	0	0	0	0	0	0	0	0	0	0	0	0	0	0	0	0	0	0
FBgn0064126	0	0	0	0	0	0	0	0	0	0	0	0	0	0	0	0	0	0	0	0
FBgn0040528	2	10	1	4	7	9	9	7	5	8	9	14	4	10	6	9	6	6	6	8
FBgn0260386	35	16	8	10	13	32	15	17	28	19	11	35	24	34	1	16	15	13	12	10
FBgn0037560	37	60	34	62	47	80	56	59	87	105	57	83	42	65	38	173	83	82	75	53
FBgn0010173	267	220	345	301	318	374	266	337	436	270	190	347	350	342	225	549	362	170	250	282
FBgn0014861	97	72	113	123	116	103	94	113	167	108	77	143	124	97	77	69	97	50	83	98
FBgn0037561	118	114	152	127	166	138	174	137	204	120	42	104	112	122	99	109	124	127	74	111
FBgn0010433	1	0	1	5	0	1	0	0	5	0	0	0	0	0	2	1	1	0	0	5
FBgn0265377	5	0	0	0	1	1	2	2	1	2	0	1	4	2	0	1	1	2	1	2
FBgn0037562	5	4	3	4	11	8	27	2	4	6	7	16	3	20	2	5	25	4	22	6
FBgn0037563	7	0	0	0	0	236	0	0	1	139	1	185	1	0	3	4	715	0	2	0
FBgn0051464	8	0	0	0	0	24	1	0	0	13	1	79	1	0	0	3	173	0	2	0
FBgn0051463	41	19	48	0	3	45	48	38	146	47	68	23	0	114	1	1	95	1	50	38
FBgn0037565	25	7	6	15	7	13	9	29	21	24	10	34	18	24	6	21	17	1	9	6
FBgn0037566	426	304	372	419	500	384	541	428	455	413	186	396	332	370	259	223	375	289	281	293
FBgn0265351	43	32	31	55	45	52	45	73	54	43	21	40	38	40	38	42	48	19	37	49
FBgn0265101	201	214	191	250	276	331	326	211	394	288	263	372	302	498	286	310	331	226	223	255
FBgn0037569	73	57	42	71	64	71	84	87	113	70	61	112	151	146	80	107	100	63	36	69
FBgn0263550	0	0	0	0	0	0	0	0	0	0	0	0	0	0	0	0	0	0	0	0
FBgn0037570	0	0	0	0	0	0	0	0	0	1	0	0	0	0	0	0	0	0	0	0
FBgn0037571	0	0	0	0	2	0	0	0	2	0	12	9	18	16	6	14	5	0	1	1
FBgn0037572	0	0	0	0	0	0	0	0	0	0	7	4	3	5	1	7	2	1	1	1
FBgn0037573	396	325	275	409	461	483	408	373	556	414	308	472	525	549	365	362	407	259	225	338
FBgn0037574	98	60	107	110	119	94	101	119	168	124	89	116	121	126	72	81	87	82	48	90
FBgn0266742	5	1	0	4	0	9	7	5	3	11	12	11	0	9	5	1	5	5	3	3
FBgn0062412	126	94	73	86	108	184	151	143	106	145	307	110	118	193	121	55	207	109	105	115
FBgn0003129	0	1	0	0	0	0	1	0	1	0	0	1	0	2	1	0	1	0	4	0
FBgn0037576	0	0	0	0	0	0	0	1	0	2	0	0	1	1	1	0	0	0	0	0
FBgn0037577	0	0	0	0	0	0	0	0	0	0	0	0	0	0	0	0	0	0	0	0
FBgn0040529	3484	2859	2402	4634	3845	4362	6018	3440	4792	4010	4248	4824	5350	6456	5035	2486	5525	6657	3300	3730
FBgn0004908	73	72	46	73	85	100	81	47	123	67	82	139	162	206	106	130	130	67	42	98
FBgn0037578	132	77	105	177	140	167	122	111	209	146	118	165	215	213	131	152	163	86	76	97
FBgn0037579	1	1	3	7	2	6	4	0	12	7	42	41	89	115	42	88	42	14	16	28
FBgn0037580	1463	1052	1297	1557	1781	1604	1550	1776	2347	1700	1351	1974	2370	2409	1684	2051	1864	864	1596	1789
FBgn0037581	21	8	8	34	21	34	15	19	51	32	39	62	113	133	62	94	54	36	14	17
FBgn0283560	0	0	0	0	0	0	0	0	0	0	0	0	0	0	0	0	0	0	0	0
FBgn0261108	107	100	91	125	135	138	129	169	193	148	113	152	142	168	110	94	110	74	73	100
FBgn0020249	222	181	142	269	265	239	239	271	299	335	173	289	206	229	180	243	285	225	268	209
FBgn0037583	160	103	102	140	200	205	144	175	289	179	125	217	255	285	160	180	240	76	92	132
FBgn0037584	0	0	0	0	0	0	0	0	3	1	1	2	0	1	0	5	5	1	1	1
FBgn0266801	50	34	11	37	42	46	24	31	78	25	53	92	145	143	70	98	68	21	19	48
FBgn0267801	0	0	0	0	0	1	0	0	0	0	0	0	0	0	0	0	0	0	0	0
FBgn0037589	0	0	0	0	0	0	0	0	0	0	0	0	0	0	0	0	0	0	0	0
FBgn0267800	0	0	0	0	0	0	0	0	0	0	0	0	0	1	0	0	0	0	0	0
FBgn0037590	1	0	0	0	0	0	2	0	1	0	0	1	1	0	1	0	0	0	0	0
FBgn0037591	0	0	0	0	0	0	0	0	2	1	2	1	3	0	0	0	0	0	0	0
FBgn0267948	0	0	0	0	0	0	0	0	0	0	0	1	0	4	1	3	0	2	1	3
FBgn0037592	199	136	148	228	206	185	215	209	311	229	198	273	434	304	199	245	233	104	157	203
FBgn0051454	69	15	16	25	13	19	27	25	42	18	12	26	17	27	12	5	48	4	12	13
FBgn0051259	112	43	76	17	27	74	67	50	139	82	65	80	12	73	10	8	107	2	69	38
FBgn0040531	2	0	4	2	1	0	1	3	1	3	0	1	43	0	0	0	0	0	3	2
FBgn0267135	0	0	0	0	0	0	0	0	1	0	0	2	3	1	5	2	0	0	0	2
FBgn0267134	0	0	0	0	1	0	0	0	0	0	0	2	0	3	2	0	0	2	0	0
FBgn0037594	0	0	0	0	0	0	0	0	0	0	0	0	0	0	0	0	0	0	0	0
FBgn0051453	112	83	37	127	138	148	90	87	180	114	91	203	255	312	162	133	196	62	27	102
FBgn0051450	265	223	202	325	329	284	421	275	333	240	159	368	350	391	285	188	331	289	196	259
FBgn0051460	23	34	29	62	44	67	67	32	82	41	42	75	91	93	63	65	80	73	35	55
FBgn0265318	12	3	7	6	6	15	10	11	9	10	23	29	24	58	18	27	23	18	11	9
FBgn0266916	85	68	44	118	88	111	65	79	206	95	81	175	243	274	130	197	132	51	36	107
FBgn0261929	0	3	0	4	7	6	5	1	5	4	0	0	4	1	3	3	4	0	0	5
FBgn0267799	1	0	0	0	0	0	0	0	0	0	1	2	2	0	2	0	0	2	0	2
FBgn0026399	0	0	0	0	0	0	0	0	0	0	0	0	0	0	0	0	0	0	0	0
FBgn0012028	0	0	0	0	0	0	0	0	0	0	0	0	0	0	0	0	0	0	0	0
FBgn0012027	0	0	0	0	0	0	0	0	0	0	0	0	0	0	0	0	0	0	0	0
FBgn0037601	5	4	3	9	1	2	7	5	11	23	0	9	1	3	1	6	2	4	5	1
FBgn0024326	349	245	311	350	355	336	351	347	520	374	255	314	344	271	206	266	330	222	256	346
FBgn0037602	39	25	30	37	40	32	79	46	42	53	38	72	55	79	46	21	50	43	32	42
FBgn0000447	291	235	317	372	395	378	427	365	463	359	270	386	461	447	360	299	389	249	230	357
FBgn0037603	75	60	46	83	60	104	118	61	81	90	71	102	120	124	89	77	101	93	55	79
FBgn0259992	17	19	18	13	14	32	24	8	17	17	49	35	14	62	22	16	93	95	52	8
FBgn0263231	1410	841	1271	1559	1606	1218	1033	1673	2520	1598	921	1447	1873	1414	1032	1175	920	389	804	1301
FBgn0086679	225	187	176	309	290	264	243	314	504	337	282	421	452	380	269	327	273	131	177	287
FBgn0037606	149	116	106	113	150	165	159	153	227	129	112	148	148	177	99	110	127	93	88	99
FBgn0037607	16587	9681	16005	28498	24447	12260	21577	26587	38023	28758	4452	12266	14048	5024	10187	11851	8715	5698	10561	12182
FBgn0012026	0	0	0	0	0	0	0	0	0	0	0	1	0	0	0	0	0	0	0	0
FBgn0012025	0	1	0	0	0	0	0	0	0	0	2	0	0	0	0	0	0	0	0	0
FBgn0012024	0	0	0	0	0	0	0	0	0	0	0	0	0	0	0	0	0	0	0	0
FBgn0037608	362	273	372	381	444	390	464	440	549	309	190	368	433	407	260	263	333	253	215	277
FBgn0037609	87	76	62	95	104	87	114	70	141	87	95	121	96	116	101	244	182	96	127	100
FBgn0037610	115	83	80	131	154	170	130	115	257	154	234	306	412	540	241	303	274	142	93	141
FBgn0037611	40	35	30	45	34	40	50	39	42	32	26	42	31	44	27	20	35	24	17	30
FBgn0053325	1	0	0	0	0	0	0	0	0	0	0	0	0	0	0	0	0	0	0	0
FBgn0266242	0	0	0	0	0	0	0	0	0	0	0	0	0	0	0	2	0	0	0	0
FBgn0265158	0	0	0	0	0	0	0	0	0	0	0	0	0	0	0	0	0	0	1	0
FBgn0001180	2	2	0	0	3	0	0	2	0	1	2	4	6	0	1	4	2	0	0	1
FBgn0037613	50	48	34	63	65	94	62	47	105	61	71	101	139	165	80	112	103	50	28	71
FBgn0037612	78	23	27	25	37	25	66	45	47	34	9	20	18	17	1	13	32	27	22	18
FBgn0037614	137	70	72	128	105	119	76	117	258	148	91	167	206	179	105	150	120	35	67	130
FBgn0037615	1	0	0	5	0	1	0	0	0	0	0	1	0	1	2	0	0	1	0	0
FBgn0037616	25	10	6	37	20	16	15	9	69	30	185	175	389	426	227	265	174	68	39	99
FBgn0037617	52	29	23	29	36	64	52	59	57	54	32	41	40	53	41	51	51	23	54	35
FBgn0037618	2	3	1	1	3	8	3	4	1	7	7	12	14	16	5	8	32	6	1	8
FBgn0037619	20	22	19	21	17	20	31	10	36	39	15	30	10	30	19	24	29	14	10	22
FBgn0037620	22	15	11	20	17	22	33	15	30	14	27	29	24	34	24	24	35	15	8	22
FBgn0037621	172	135	138	217	223	207	194	217	292	230	170	235	286	272	206	185	228	121	107	190
FBgn0037622	80	71	34	80	77	115	95	74	123	78	72	122	120	137	72	116	118	52	69	58
FBgn0037623	31	21	17	24	32	38	14	34	58	34	52	71	96	87	29	71	70	29	43	29
FBgn0037624	291	241	242	301	386	281	248	326	459	316	177	320	295	240	212	229	251	116	197	287
FBgn0083971	0	0	0	0	0	0	0	0	0	0	0	0	0	0	0	0	0	0	0	0
FBgn0037625	4	0	0	0	0	0	0	0	0	0	0	0	0	0	0	0	0	0	0	0
FBgn0265159	0	0	0	0	0	0	0	0	0	0	1	1	2	2	5	0	0	0	0	0
FBgn0037626	0	0	0	0	0	0	0	0	0	0	9	6	12	11	10	9	5	0	2	1
FBgn0037627	8	3	1	2	0	2	2	1	5	2	3	10	3	5	4	4	3	1	0	2
FBgn0085330	158	59	26	11	12	77	55	24	75	39	76	143	41	121	39	14	263	23	133	48
FBgn0261015	23	17	30	22	38	24	18	33	27	20	55	55	75	100	39	69	36	24	27	44
FBgn0046874	0	0	0	0	0	1	0	0	0	0	0	0	1	1	0	0	0	0	0	0
FBgn0053191	4	0	3	4	4	4	3	1	1	2	11	8	15	16	3	13	8	1	4	3
FBgn0053189	9	7	13	22	23	10	15	13	39	16	59	72	107	144	67	81	84	52	13	51
FBgn0037630	0	0	0	0	0	0	0	0	1	2	3	1	5	1	6	3	2	0	0	0
FBgn0037632	1009	653	923	990	1119	1064	813	1062	1757	1202	514	1094	1116	968	676	709	805	440	604	847
FBgn0037633	24	24	32	36	45	49	40	50	48	46	9	37	30	27	25	19	39	19	31	35
FBgn0037634	19	21	20	26	17	31	14	18	37	29	20	35	26	25	27	26	32	14	14	20
FBgn0037635	665	529	529	848	1164	611	1181	1015	1072	815	304	473	566	305	574	170	387	257	270	352
FBgn0286516	691	576	486	573	684	982	648	683	919	642	437	611	767	666	408	579	583	410	335	455
FBgn0262604	0	0	0	0	1	0	2	0	0	1	0	1	4	3	2	5	9	1	0	1
FBgn0040532	150	113	44	62	96	148	123	76	118	124	76	108	107	118	96	124	160	78	170	111
FBgn0037637	510	448	450	652	600	592	797	520	699	590	547	614	674	819	548	999	944	789	671	595
FBgn0037638	201	162	149	226	225	236	163	216	349	238	223	332	433	393	283	348	325	121	152	224
FBgn0262614	156	98	49	125	150	160	118	142	284	193	102	276	199	186	118	223	162	70	145	170
FBgn0011966	0	0	0	0	0	0	0	0	0	0	0	0	0	0	0	0	0	0	0	0
FBgn0053551	0	0	0	0	0	0	0	0	0	0	0	0	0	0	0	0	0	0	0	0
FBgn0264790	0	0	0	0	0	0	0	0	0	0	0	0	0	0	0	0	1	0	0	0
FBgn0003015	0	0	0	0	0	0	0	0	0	0	0	0	0	0	0	0	0	0	0	0
FBgn0286867	0	0	0	0	0	0	0	0	0	0	0	0	0	0	0	0	0	0	0	0
FBgn0037643	959	738	729	1258	1206	1264	1316	1134	1627	1386	1137	1793	1809	1627	1324	1038	1457	822	1388	1315
FBgn0037644	224	166	145	218	253	246	223	224	318	222	136	254	269	320	168	171	208	119	108	201
FBgn0286204	24	10	0	1	0	1	4	0	0	0	0	0	0	0	0	0	0	0	0	0
FBgn0037646	172	80	101	145	159	118	203	212	164	112	67	104	155	88	112	44	77	87	77	89
FBgn0037647	128	116	120	138	159	131	138	152	166	156	110	168	174	158	111	162	157	89	120	121
FBgn0027503	102	101	101	144	137	102	98	153	221	133	82	153	191	125	93	151	87	38	61	124
FBgn0260243	72	54	31	91	58	73	75	63	143	78	65	87	108	79	70	82	72	40	33	71
FBgn0037648	99	61	71	81	99	93	98	101	124	110	68	91	85	87	78	75	103	47	77	80
FBgn0051100	56	30	3	5	15	59	32	35	35	42	31	77	5	94	1	6	75	12	199	2
FBgn0037650	0	0	0	0	0	0	0	0	0	0	0	0	0	0	0	0	0	0	0	0
FBgn0037652	544	493	554	708	715	640	806	718	787	653	241	500	566	468	483	345	574	339	408	542
FBgn0026380	617	465	523	717	712	757	774	673	887	595	550	1017	1154	1272	842	803	892	615	567	759
FBgn0037653	196	144	143	233	223	275	199	184	338	279	192	316	436	443	238	335	314	171	127	248
FBgn0037654	27	6	4	32	27	30	7	13	73	31	99	114	187	202	94	148	124	53	20	49
FBgn0037655	367	270	239	336	349	403	338	343	592	383	399	531	659	694	409	554	459	230	234	383
FBgn0040534	133	132	130	165	145	223	220	144	177	130	81	178	173	218	149	91	199	132	81	116
FBgn0037656	60	41	28	64	63	74	66	62	100	54	70	124	167	178	90	92	113	78	39	60
FBgn0264075	124	70	60	91	112	119	107	102	231	128	78	141	150	142	77	154	123	41	72	104
FBgn0002932	77	65	49	102	90	102	72	78	165	101	99	185	242	183	87	183	127	60	39	106
FBgn0063298	0	0	0	0	0	0	0	0	0	0	5	3	9	5	4	5	1	0	0	1
FBgn0037657	188	146	184	182	244	232	167	204	337	209	139	214	241	193	168	205	151	118	127	182
FBgn0010222	48	98	17	63	65	89	67	74	174	81	50	82	105	130	84	571	335	153	316	126
FBgn0014018	229	243	216	313	285	241	288	336	538	376	210	349	383	257	237	525	314	227	376	316
FBgn0028708	72	70	45	69	81	89	94	72	139	80	55	94	71	80	62	72	84	43	64	71
FBgn0037659	153	96	78	156	157	173	130	169	266	189	124	198	260	221	129	163	170	55	84	143
FBgn0037660	92	56	97	88	105	137	90	127	176	118	77	128	185	174	107	143	105	55	70	107
FBgn0037661	36	27	30	41	46	35	52	31	46	31	20	22	54	35	24	26	28	17	14	21
FBgn0003165	180	143	147	193	209	255	140	201	332	210	117	199	245	131	101	223	226	106	111	172
FBgn0037662	0	1	0	0	0	0	0	0	1	1	0	0	0	0	0	15	0	12	0	0
FBgn0266706	3	0	0	1	1	1	0	2	3	1	0	2	1	0	1	1	3	1	0	1
FBgn0000412	726	559	525	775	795	811	626	803	1304	779	568	1114	1426	1378	865	915	913	378	391	719
FBgn0260935	120	69	63	74	88	109	100	112	149	99	66	114	106	113	62	109	88	31	76	83
FBgn0037664	230	134	19	46	31	41	49	21	89	33	136	191	274	373	123	212	151	53	30	86
FBgn0037665	1	1	0	0	0	0	3	1	0	1	1	0	0	0	0	0	0	1	0	0
FBgn0037666	0	0	0	1	0	0	0	0	0	0	0	0	1	0	0	0	1	0	0	0
FBgn0037667	52	44	44	57	64	66	47	73	92	60	31	90	115	112	63	81	74	45	46	69
FBgn0037668	5	0	1	1	0	0	1	1	0	0	2	3	2	1	4	11	4	0	1	3
FBgn0037669	59	58	55	110	88	109	115	84	119	74	56	138	112	205	96	110	135	87	57	86
FBgn0037670	52	27	33	68	44	62	66	35	58	47	32	60	63	89	49	53	75	56	48	40
FBgn0037671	1607	842	686	1208	1260	1539	1469	1196	1532	1468	1123	1697	1119	2010	911	919	1789	881	2282	771
FBgn0037672	36	91	28	45	42	82	111	35	37	70	127	24	62	84	94	128	62	92	40	103
FBgn0010803	423	413	383	583	544	517	529	484	825	644	313	583	651	638	569	1257	813	597	577	637
FBgn0285911	193	178	134	222	216	268	223	210	364	191	154	292	259	287	177	257	303	126	184	184
FBgn0286030	5	2	5	10	9	2	7	5	0	1	2	3	7	8	3	0	0	6	0	5
FBgn0037676	13	12	2	8	15	15	6	7	20	6	1	11	13	1	3	7	18	0	0	11
FBgn0037675	0	0	0	0	0	0	0	0	1	0	0	1	4	1	1	0	0	0	0	2
FBgn0037677	0	0	0	0	0	4	0	0	0	0	0	0	0	0	0	0	8	0	19	0
FBgn0037678	531	137	167	4	10	464	175	155	309	38	251	82	17	304	3	26	1313	5	885	176
FBgn0037679	86	48	43	82	62	92	68	60	109	76	70	97	132	140	78	81	105	55	47	84
FBgn0037680	43	40	24	32	48	53	65	42	61	45	37	68	84	58	37	59	55	44	46	49
FBgn0262993	6	8	5	8	12	11	8	7	13	19	5	6	3	4	4	8	10	5	11	1
FBgn0266410	629	491	535	661	656	778	599	726	1017	811	466	672	571	602	401	1122	606	510	477	585
FBgn0086053	0	0	0	0	0	0	0	0	0	0	0	0	0	0	0	0	0	0	0	0
FBgn0086054	0	0	0	0	0	0	0	0	0	0	0	0	0	0	0	0	0	0	0	0
FBgn0263750	0	0	1	0	0	0	0	0	0	0	5	4	4	16	4	6	4	2	2	1
FBgn0037683	123	74	68	117	141	164	147	141	112	190	288	149	112	244	142	142	217	240	218	37
FBgn0037684	46	98	55	2	19	111	225	58	121	10	188	266	9	497	12	18	253	17	69	122
FBgn0000723	51	31	18	39	51	48	71	29	59	46	65	121	57	104	32	48	71	22	29	52
FBgn0267820	0	0	0	0	0	0	0	0	0	0	1	3	1	1	1	1	0	0	0	1
FBgn0037685	0	0	0	0	0	0	0	0	0	0	0	0	0	3	0	0	0	0	0	0
FBgn0083953	151	102	77	150	149	165	171	116	164	103	104	143	128	145	122	92	133	106	77	98
FBgn0037686	5052	4689	4727	6109	6451	6705	8757	5849	7075	6116	3623	4233	5617	5537	5549	4045	5191	8011	3940	5405
FBgn0037687	176	152	151	228	259	281	268	262	334	265	233	271	270	284	202	156	295	157	200	199
FBgn0037688	98	70	86	118	163	127	129	139	212	134	156	184	227	231	167	165	154	96	131	184
FBgn0037689	0	0	0	0	0	0	0	0	0	0	0	0	0	0	0	0	0	0	0	0
FBgn0260237	0	0	0	0	0	0	0	0	0	0	0	0	0	0	0	0	0	0	0	0
FBgn0265201	40	25	9	51	29	57	25	29	85	24	48	77	129	171	52	69	73	48	7	34
FBgn0003889	34	14	9	150	46	89	22	35	252	94	845	1018	1815	2042	1035	1551	918	247	218	343
FBgn0037690	6	8	0	7	5	9	9	0	12	4	1	8	7	2	1	12	15	2	0	5
FBgn0011740	210	153	120	239	231	245	169	220	367	236	181	300	382	317	226	331	251	124	140	218
FBgn0261552	1145	818	1076	1052	1067	1169	1045	1428	1662	1435	821	1154	1078	1008	769	963	771	684	888	990
FBgn0037696	159	154	143	190	219	187	260	237	204	203	90	164	146	128	145	76	170	77	165	136
FBgn0037697	188	113	40	128	143	176	154	53	156	81	28	110	86	31	70	51	156	41	22	68
FBgn0037698	3	30	6	9	19	38	10	5	22	11	2	29	13	1	10	8	26	2	2	12
FBgn0266730	0	0	0	2	0	0	0	0	0	0	2	4	4	7	3	8	0	2	0	0
FBgn0043791	130	33	76	10	323	21	93	162	34	112	1	5	2	7	2	2	4	3	5	0
FBgn0014380	198	84	70	96	92	164	213	128	186	160	103	170	75	243	76	70	286	89	122	92
FBgn0037700	238	159	173	235	281	238	230	236	336	214	167	306	439	428	253	280	251	107	117	188
FBgn0267790	680	444	446	582	636	681	504	654	1008	592	451	859	1080	909	596	734	801	319	412	666
FBgn0003205	235	217	155	281	317	333	274	230	449	277	201	344	322	373	224	270	313	208	166	248
FBgn0014022	114	76	102	117	139	94	128	102	173	104	55	103	130	126	70	94	77	49	59	82
FBgn0014023	383	314	318	400	385	449	499	393	576	419	234	414	409	342	326	215	416	261	301	292
FBgn0037702	330	213	187	313	314	445	265	345	601	390	391	465	603	640	366	466	404	229	234	312
FBgn0037703	43	25	23	32	40	54	30	43	75	44	39	52	45	32	30	45	38	23	45	38
FBgn0262180	0	0	0	0	0	0	0	0	0	0	0	0	0	0	0	0	0	0	0	0
FBgn0000244	113	164	169	200	233	239	199	296	280	228	117	205	129	124	107	157	137	75	137	138
FBgn0037705	149	104	68	92	137	154	86	140	242	172	113	165	161	128	108	131	101	44	64	128
FBgn0260722	47	68	32	72	58	82	76	61	98	69	71	81	89	62	64	72	99	59	57	64
FBgn0037707	196	181	221	235	243	212	215	222	319	196	150	270	309	265	219	188	198	103	98	186
FBgn0037708	43	38	47	67	78	61	69	50	55	47	18	44	30	32	51	53	45	40	28	46
FBgn0037709	352	323	348	540	498	572	517	495	673	597	641	559	560	607	565	262	515	428	399	522
FBgn0024833	232	210	191	206	251	307	322	270	359	314	226	313	293	303	194	205	275	117	195	223
FBgn0027950	98	93	73	120	104	120	99	97	159	105	69	133	172	187	90	116	133	68	51	77
FBgn0037710	237	180	241	359	301	352	267	261	463	368	261	438	636	736	338	736	525	375	328	274
FBgn0261049	43	33	27	64	41	55	43	50	60	70	41	67	68	66	30	64	51	18	32	38
FBgn0037712	10	13	6	21	7	17	17	6	15	8	11	22	11	28	15	18	19	16	8	6
FBgn0037713	29	21	11	21	34	35	30	31	31	33	29	21	36	47	30	18	41	24	27	22
FBgn0037714	409	310	245	589	521	500	512	507	712	708	562	476	450	585	452	248	387	536	465	336
FBgn0037715	825	5078	660	1427	1143	6378	1346	5005	14006	10229	1014	1265	1338	1184	1175	10814	5379	3706	7294	9148
FBgn0027338	1636	1033	1431	1529	1813	1507	1320	1837	2453	1903	948	1572	1733	1448	1115	1344	1212	637	1078	1366
FBgn0037716	87	62	60	90	101	107	65	80	191	115	120	173	249	276	125	176	120	58	68	89
FBgn0037717	8	22	3	9	13	21	5	7	17	7	2	10	9	3	9	12	17	1	1	8
FBgn0053654	0	0	0	0	0	4	0	3	7	9	0	0	0	0	3	29	41	34	9	8
FBgn0037718	1451	1067	1274	1462	2278	1643	1417	1614	1858	1603	1274	1347	1319	1184	984	581	909	418	1100	1404
FBgn0037719	128	119	109	121	167	144	117	154	276	166	90	165	149	177	94	313	178	90	155	143
FBgn0037720	122	47	46	79	103	116	86	119	118	133	96	182	156	201	79	109	145	48	107	60
FBgn0037721	37	13	5	11	21	7	28	18	22	24	16	70	10	35	7	1	24	2	31	4
FBgn0037722	49	39	34	64	59	64	51	45	69	59	28	58	77	61	41	70	54	23	30	41
FBgn0005585	10059	9369	10674	16664	17351	15572	17779	13323	18191	15804	14340	14138	13046	16085	14052	4347	9840	7931	9402	13066
FBgn0286035	6	7	9	20	10	13	7	4	4	14	11	14	0	16	12	1	5	6	4	11
FBgn0037723	2100	1371	2337	2457	2916	1809	2852	3070	2438	2259	427	1078	1279	739	1217	301	930	1120	880	1415
FBgn0266413	0	0	2	1	0	0	0	0	0	0	0	2	1	0	1	1	1	0	0	0
FBgn0003334	161	116	115	137	158	153	108	155	308	192	174	219	325	261	137	281	177	69	92	172
FBgn0012344	36	28	9	53	39	52	37	18	80	28	65	113	156	161	88	98	142	40	11	56
FBgn0037724	6631	1982	2058	3148	4256	4596	7649	3987	4010	4425	6057	7063	3424	10208	4552	4230	11553	8042	7097	1950
FBgn0037726	5	0	0	4	1	2	0	1	5	0	4	9	6	7	5	3	2	0	1	0
FBgn0263389	0	0	0	0	0	0	0	0	0	0	1	1	1	2	2	0	0	0	0	0
FBgn0037727	1	3	2	0	1	6	3	5	7	7	2	1	2	3	3	1	1	0	0	1
FBgn0037728	2260	1926	2046	2607	2585	2602	2528	2623	3711	2548	1519	2622	3044	2686	2206	1998	2333	1347	1693	2548
FBgn0028997	46	24	11	64	37	79	47	38	105	58	119	206	269	375	151	257	201	100	46	76
FBgn0037730	16	25	27	103	72	32	40	52	72	102	353	138	140	158	155	55	96	80	85	128
FBgn0069242	569	569	536	908	895	759	972	698	1079	904	841	864	1100	871	843	498	770	475	625	971
FBgn0037731	0	0	0	0	0	0	0	0	2	0	0	0	0	0	0	0	0	0	1	0
FBgn0260463	2	0	1	7	7	3	1	1	0	3	6	9	2	3	8	1	0	0	3	0
FBgn0053105	0	0	0	0	0	0	0	0	0	0	0	0	0	0	0	0	0	0	0	0
FBgn0052939	0	0	0	0	0	0	0	0	0	0	0	0	0	0	0	0	0	0	0	0
FBgn0051352	207	201	187	249	249	296	379	265	400	246	195	223	212	216	172	239	338	248	198	296
FBgn0037734	159	112	98	175	161	176	141	172	316	209	232	306	449	464	211	281	221	122	107	179
FBgn0278604	64	43	34	65	64	105	51	60	123	76	62	113	163	159	79	116	103	38	49	83
FBgn0263477	0	0	1	0	0	1	0	0	0	0	1	0	0	0	0	0	0	0	0	0
FBgn0002431	1464	940	1351	1642	1661	1489	1077	2053	2960	1996	885	1577	1862	1289	1089	1672	1227	637	1089	1242
FBgn0262477	9	2	1	11	24	14	4	1	8	3	0	6	1	1	1	4	10	2	0	11
FBgn0003886	6	27	1	5	10	131	23	11	49	163	6	70	13	11	17	451	34	110	19	159
FBgn0037736	24	23	7	24	21	31	22	9	43	11	6	33	19	20	14	17	29	3	2	23
FBgn0037737	61	46	33	94	78	79	106	56	118	84	51	76	87	129	78	83	95	55	43	62
FBgn0085438	2	4	2	5	6	3	4	2	7	4	4	7	3	6	1	5	3	2	5	2
FBgn0051415	0	2	1	2	0	1	0	0	4	5	25	27	40	59	27	36	20	14	13	6
FBgn0037739	46	53	47	80	58	70	59	52	100	66	38	88	110	99	58	86	89	59	22	51
FBgn0005777	457	333	424	550	455	478	473	528	648	521	311	549	619	624	429	479	494	283	365	473
FBgn0037741	45	52	46	36	44	61	54	48	55	26	23	30	30	17	29	34	34	21	22	56
FBgn0037742	177	112	57	191	151	180	115	125	333	144	180	420	580	634	291	351	368	126	55	160
FBgn0037743	186	155	161	237	209	223	258	230	319	230	161	197	215	195	203	455	309	174	331	305
FBgn0286506	819	610	698	1316	1056	816	1220	1025	1495	1182	600	949	1205	925	891	793	891	546	817	989
FBgn0266720	138	129	79	132	145	178	159	131	242	149	112	155	126	131	98	164	166	74	91	122
FBgn0037746	118	71	59	152	101	152	71	97	333	124	279	440	726	752	362	516	404	128	69	196
FBgn0024330	83	77	63	89	102	100	60	75	133	99	52	105	149	141	80	101	104	38	46	60
FBgn0037747	153	120	55	159	118	147	173	111	173	146	187	191	140	205	152	111	186	149	146	170
FBgn0037749	137	121	98	152	173	163	169	124	250	171	172	307	288	358	219	196	268	150	128	193
FBgn0037750	104	52	56	45	81	131	106	74	131	105	189	160	97	213	55	85	120	36	118	54
FBgn0037751	79	35	31	78	61	104	50	72	155	63	89	162	237	218	122	172	117	35	30	59
FBgn0261599	7396	8390	6426	10017	9481	11313	14211	8144	11136	8846	6485	8472	9500	9350	8899	8048	10948	13753	7187	9324
FBgn0086663	3	0	7	1	4	1	0	1	9	1	3	1	4	5	5	5	3	5	3	3
FBgn0051514	0	0	0	3	0	0	0	2	1	0	0	1	0	1	0	0	4	0	0	0
FBgn0037753	26	18	12	14	26	40	19	25	30	17	8	20	15	23	22	22	32	32	20	18
FBgn0002868	2474	1770	823	3200	1804	2370	3806	1392	4432	3804	3510	4925	4259	5181	4316	5616	6462	6681	3091	1637
FBgn0037754	23	20	1	18	18	21	5	8	19	10	1	17	4	0	11	6	24	2	0	18
FBgn0037755	66	60	39	64	87	81	79	70	102	80	55	92	90	82	65	178	118	56	105	85
FBgn0037756	652	618	568	860	996	891	937	798	1171	854	655	839	877	742	730	531	832	427	701	916
FBgn0037757	117	100	93	120	132	119	99	121	210	106	92	165	166	158	108	170	116	50	78	121
FBgn0267819	0	2	0	0	2	1	1	0	0	1	1	0	0	0	1	0	1	0	0	0
FBgn0037758	299	317	202	384	363	351	344	396	573	505	455	521	482	383	356	264	302	188	257	469
FBgn0037759	7	12	12	50	18	33	15	12	77	26	172	239	394	470	171	283	162	65	42	90
FBgn0037760	199	134	124	272	261	278	132	293	527	363	263	463	623	462	298	463	261	86	128	268
FBgn0264827	1	2	0	0	1	0	0	0	0	0	0	0	3	4	0	1	2	0	0	0
FBgn0037761	2	1	0	2	1	0	5	1	7	2	0	0	6	0	1	0	0	0	0	0
FBgn0037762	0	2	0	2	0	0	5	0	0	1	0	2	3	0	0	0	0	0	0	0
FBgn0037763	11	2	3	17	4	7	5	11	28	8	36	50	70	93	42	73	58	18	4	20
FBgn0037764	0	0	1	0	1	2	5	0	3	0	4	0	2	2	2	5	1	1	0	1
FBgn0037765	9	2	0	4	3	4	6	3	5	0	0	8	5	4	3	3	2	1	0	2
FBgn0262104	131	120	55	149	143	241	152	105	250	111	127	245	286	456	212	170	312	135	32	98
FBgn0267440	3	3	1	1	8	6	7	5	11	4	0	4	9	10	7	6	8	4	0	2
FBgn0085331	31	22	13	32	22	45	24	20	38	25	31	52	82	84	28	29	49	20	6	19
FBgn0262105	1	0	0	1	0	0	0	0	1	4	4	4	9	12	12	14	5	2	1	15
FBgn0037766	13	12	2	14	11	11	2	5	22	13	2	9	12	4	4	4	16	1	0	4
FBgn0267336	68	80	80	83	98	95	102	128	73	95	53	62	50	24	33	35	52	41	27	49
FBgn0266389	0	0	0	0	0	0	0	0	0	0	0	0	0	0	2	0	0	0	0	0
FBgn0037770	179	138	131	187	189	156	167	173	297	208	54	173	147	121	108	175	130	66	112	172
FBgn0283554	0	0	0	0	0	0	0	0	0	0	0	0	0	0	0	0	0	0	0	0
FBgn0045473	0	0	0	0	0	0	0	0	0	0	0	0	0	2	0	0	0	1	0	0
FBgn0037772	0	0	0	1	0	0	0	0	0	0	0	3	4	5	1	3	1	0	0	1
FBgn0037773	26	31	7	30	31	29	18	29	44	11	29	61	74	110	43	50	39	25	17	32
FBgn0053208	323	197	241	216	280	364	258	345	494	336	250	410	429	404	261	330	309	97	216	280
FBgn0051407	0	0	0	0	0	0	0	1	0	0	28	17	29	32	18	24	12	6	3	8
FBgn0027524	174	126	108	166	182	202	170	154	307	151	183	252	313	350	231	205	208	164	120	182
FBgn0037777	120	87	92	143	119	130	174	121	183	131	92	163	229	262	133	137	208	103	103	121
FBgn0037778	64	54	64	77	96	91	87	99	72	71	41	78	74	82	60	47	78	172	46	65
FBgn0037779	831	698	975	1768	1467	1170	1575	1423	1658	1357	755	1063	1417	913	1275	400	996	816	841	1339
FBgn0037780	127	110	84	148	157	163	138	127	249	136	131	205	271	297	173	240	190	116	76	127
FBgn0037781	61	21	11	19	17	27	23	26	31	27	21	44	36	63	32	15	79	25	35	27
FBgn0265081	25	5	3	4	4	1	4	4	4	21	4	7	2	11	3	0	8	3	17	14
FBgn0051410	47	43	31	26	38	77	69	29	108	83	58	86	34	52	25	26	81	8	25	29
FBgn0037782	468	164	175	7	17	200	266	114	315	111	139	195	26	301	11	14	753	7	252	353
FBgn0037783	33	1	5	3	0	3	4	6	21	28	48	51	0	68	0	6	68	0	4	51
FBgn0266732	0	0	0	0	0	0	0	0	0	0	0	0	1	0	0	0	1	0	0	0
FBgn0053629	0	0	0	0	0	0	0	0	1	0	0	0	0	0	0	0	0	0	0	0
FBgn0053630	0	0	0	0	0	0	0	0	0	0	0	0	0	0	0	0	0	0	0	0
FBgn0053631	0	0	0	0	0	0	0	0	0	0	0	1	0	0	0	0	0	0	0	0
FBgn0053783	0	0	0	0	0	0	0	0	0	0	0	0	0	0	0	0	0	0	0	0
FBgn0053784	0	0	0	0	0	0	0	0	0	0	0	0	0	0	0	0	0	0	0	0
FBgn0041105	0	1	0	1	0	0	2	1	2	1	0	1	4	0	0	0	1	0	0	1
FBgn0037786	12	5	1	18	16	13	18	13	13	16	34	13	9	28	21	5	33	6	25	4
FBgn0266414	0	0	0	0	0	0	0	0	0	0	0	1	1	0	0	0	0	0	0	0
FBgn0262378	0	0	0	0	0	0	0	0	0	0	0	0	0	0	0	0	0	0	0	0
FBgn0263413	12	16	6	42	17	10	6	17	39	35	11	18	24	4	8	24	18	7	21	19
FBgn0262419	0	0	0	0	0	0	0	0	0	0	0	0	0	0	0	0	0	0	0	0
FBgn0262459	0	0	0	0	0	0	0	0	0	0	0	0	0	0	0	0	0	0	0	0
FBgn0028734	378	220	242	345	345	338	246	354	663	399	342	566	670	503	410	558	371	144	215	395
FBgn0037788	86	55	16	98	96	102	43	33	109	121	47	196	117	89	49	70	120	11	64	46
FBgn0266721	3	0	1	3	5	10	1	4	4	2	10	9	19	12	10	4	19	2	2	3
FBgn0051477	169	98	63	140	123	168	162	112	212	90	119	242	266	456	195	142	234	105	18	93
FBgn0001321	25	4	13	1	10	27	13	10	16	25	3	52	4	17	3	8	24	2	44	3
FBgn0267705	0	0	0	1	0	0	1	0	0	1	5	2	18	25	8	8	3	2	0	2
FBgn0004889	369	302	222	396	425	431	345	375	708	429	353	596	676	623	380	451	470	217	333	354
FBgn0037792	92	68	44	60	74	97	60	67	157	87	45	111	98	98	67	91	78	37	48	58
FBgn0261817	0	41	64	14	60	157	57	24	12	34	3	13	38	23	49	6	32	12	4	13
FBgn0086359	89	44	30	55	56	100	50	56	120	53	48	114	138	145	45	71	116	33	32	78
FBgn0085332	0	0	0	0	0	0	0	0	0	0	0	0	0	1	0	0	0	0	0	0
FBgn0037794	44	24	18	36	37	60	35	36	44	23	27	41	39	24	26	31	43	28	26	30
FBgn0040238	149	75	69	158	103	96	138	122	158	201	144	197	109	175	90	118	193	116	151	83
FBgn0037796	11	9	10	22	22	64	56	26	32	37	6	115	16	17	15	6	71	8	64	16
FBgn0004575	58	73	11	70	83	115	38	40	121	77	10	85	61	8	54	42	99	9	1	64
FBgn0025879	8	5	2	9	9	15	17	4	11	9	7	10	7	6	6	7	16	6	7	8
FBgn0037797	0	0	0	0	0	0	0	0	0	0	0	0	2	4	0	1	0	0	1	0
FBgn0037798	11	7	2	18	12	25	7	12	28	21	48	72	93	138	64	63	63	31	9	21
FBgn0083943	23	14	11	48	20	50	19	27	88	41	107	213	307	419	181	283	238	103	34	72
FBgn0261928	10	20	11	19	11	29	6	12	37	12	57	59	123	77	63	111	47	7	17	33
FBgn0037801	1713	1290	2013	2312	2202	1550	1937	2234	1941	1592	503	1153	1364	385	1036	545	749	453	1282	1781
FBgn0037802	27	10	9	14	17	17	27	17	17	17	11	18	11	17	13	15	9	8	10	11
FBgn0040078	471	347	429	578	565	500	498	570	791	506	398	663	829	871	511	606	595	289	315	504
FBgn0262617	124	47	66	89	71	87	77	96	157	123	148	251	294	237	128	228	172	44	106	106
FBgn0011970	0	0	0	0	0	0	0	0	0	0	0	0	0	0	0	0	0	0	0	0
FBgn0037807	55	22	22	21	53	90	112	60	24	46	36	59	11	116	22	5	60	18	54	10
FBgn0266717	1006	574	781	869	938	955	603	1146	1773	1172	592	879	1015	734	523	955	603	281	685	786
FBgn0037809	53	42	33	53	71	51	63	52	78	71	46	80	90	110	48	79	58	35	31	41
FBgn0037810	313	215	182	411	348	345	216	351	754	377	383	728	958	800	483	806	483	109	198	358
FBgn0037811	18	6	6	15	10	15	21	9	30	10	20	37	58	55	30	47	43	20	2	9
FBgn0037812	8	7	6	16	12	11	13	13	34	10	24	63	70	109	54	52	53	29	12	17
FBgn0051406	0	0	0	4	0	9	3	0	10	1	43	49	89	108	55	61	63	9	4	28
FBgn0015396	48	52	23	71	63	77	51	55	111	63	28	97	93	79	62	86	110	31	32	77
FBgn0020379	57	22	18	44	24	66	34	30	96	53	61	97	143	113	49	65	66	24	23	53
FBgn0266243	3	0	0	1	0	2	1	1	0	0	1	1	0	0	1	1	0	0	0	0
FBgn0259938	226	147	196	295	355	228	249	345	346	321	165	168	271	128	132	110	167	124	149	163
FBgn0045443	1	0	0	1	1	0	0	1	2	0	2	6	6	10	3	2	5	2	0	1
FBgn0037814	198	104	87	195	207	200	138	184	376	222	206	346	461	408	215	331	226	84	86	187
FBgn0262223	0	0	0	0	0	0	0	0	0	0	0	0	0	0	0	0	0	0	0	0
FBgn0262420	0	0	0	0	0	0	0	0	0	0	0	0	0	0	0	0	0	0	0	0
FBgn0024957	1911	1920	2021	3435	4223	2577	2159	5463	6865	6878	3976	1651	3531	2009	1913	3878	2551	1322	3214	3966
FBgn0037815	85	84	112	101	145	119	118	98	131	88	34	68	68	99	65	63	96	72	46	96
FBgn0037816	61	50	81	72	77	47	85	78	106	69	40	83	78	77	49	54	66	38	48	48
FBgn0278600	0	0	0	0	0	1	0	1	0	0	0	0	0	0	0	0	0	0	0	0
FBgn0037817	109	48	69	102	89	110	147	101	126	135	59	91	88	82	115	101	99	69	122	74
FBgn0266244	0	0	0	0	0	0	0	0	0	1	5	0	3	0	3	5	2	0	0	0
FBgn0266260	0	0	0	0	0	0	0	1	2	1	0	0	0	0	0	1	0	0	0	0
FBgn0267136	0	0	0	0	0	0	0	0	0	0	1	2	3	0	2	0	3	0	0	0
FBgn0001235	237	182	208	229	264	234	184	339	411	403	141	283	172	68	120	189	192	87	260	130
FBgn0263547	0	0	0	0	0	0	0	0	0	0	0	0	0	0	0	0	0	0	0	0
FBgn0264788	5	1	0	0	0	4	1	0	5	1	0	3	1	1	2	1	3	0	0	0
FBgn0037818	135	55	52	129	87	111	177	93	67	109	208	148	145	208	126	120	241	167	148	41
FBgn0037819	188	166	178	143	171	151	309	177	245	104	93	96	89	97	116	56	117	60	121	247
FBgn0265161	1	0	2	0	2	0	3	1	1	2	6	2	10	5	8	3	7	0	1	2
FBgn0262717	28	39	24	5	30	159	34	47	41	26	13	247	6	14	4	12	25	2	16	16
FBgn0020385	3691	3751	3770	4482	5691	5299	4704	7279	6156	6578	2359	2378	4671	1818	2469	1556	1797	1186	2706	3968
FBgn0037822	369	288	316	400	412	404	453	389	515	347	222	371	450	397	286	272	315	298	248	370
FBgn0051391	4	0	0	3	5	2	2	2	2	1	14	14	40	44	17	40	45	4	4	12
FBgn0051467	16	10	8	19	13	12	32	14	24	8	25	17	31	26	19	30	21	7	9	16
FBgn0037824	0	0	0	0	0	0	1	0	0	0	3	1	1	3	3	1	0	0	0	0
FBgn0051278	48	26	38	45	49	46	54	35	61	42	27	52	56	76	53	45	54	31	37	35
FBgn0051373	29	43	35	212	126	123	104	121	304	437	1138	383	265	322	244	306	297	312	280	276
FBgn0037826	1	0	0	2	1	2	1	1	8	6	49	48	129	109	54	46	19	12	3	18
FBgn0037827	0	0	0	0	0	0	0	0	0	0	3	1	7	3	3	6	3	5	1	1
FBgn0037828	1	3	5	16	1	12	3	4	22	5	54	73	118	131	78	83	88	40	20	18
FBgn0004841	3	8	0	4	4	5	0	2	9	1	2	13	14	14	3	8	14	2	0	8
FBgn0037829	0	1	0	0	0	0	0	1	0	2	33	21	47	61	34	37	31	11	12	18
FBgn0051272	428	104	120	397	315	256	327	478	255	405	336	405	215	482	231	100	381	300	273	34
FBgn0266371	0	0	0	0	0	0	0	0	0	0	2	1	3	7	3	2	2	0	0	1
FBgn0051390	84	91	58	90	116	118	122	93	153	127	81	123	183	196	116	145	141	101	58	102
FBgn0266372	0	0	0	0	0	0	0	0	2	0	3	0	0	5	0	2	1	1	0	0
FBgn0037831	73	45	39	69	57	82	57	70	117	55	35	72	88	81	68	90	89	53	34	68
FBgn0010421	74	58	72	92	105	86	98	112	136	107	88	126	181	158	100	101	111	67	59	88
FBgn0266446	154	34	32	20	18	107	52	49	114	80	19	591	4	40	12	9	96	14	97	17
FBgn0266451	0	0	0	0	0	0	0	0	0	0	0	0	0	0	0	0	0	0	0	0
FBgn0266448	32	4	2	2	9	27	15	11	30	19	3	79	3	2	0	1	13	2	29	5
FBgn0037832	1	0	0	0	0	2	3	0	0	1	1	11	1	0	0	3	2	0	0	0
FBgn0261356	0	3	0	1	0	0	9	2	2	2	2	3	7	6	0	1	5	1	1	1
FBgn0261380	441	275	453	484	585	390	484	520	534	422	201	364	388	398	328	230	348	178	295	313
FBgn0260944	389	365	372	483	426	469	591	457	489	457	275	448	439	537	355	228	386	294	290	391
FBgn0037834	386	321	427	398	497	406	385	470	560	407	144	335	360	206	310	319	330	192	247	369
FBgn0017577	114	116	165	179	123	150	120	202	204	141	72	157	139	103	102	75	120	55	79	138
FBgn0037835	11	12	13	6	20	19	21	4	13	15	11	46	2	11	7	8	28	5	34	5
FBgn0037836	1	1	4	3	2	5	1	1	8	1	1	5	1	5	2	4	2	1	1	6
FBgn0037837	0	0	0	2	0	1	5	0	2	1	7	11	22	26	12	12	14	7	2	9
FBgn0037838	34	8	6	21	9	28	22	18	30	21	14	50	60	35	24	29	55	14	3	20
FBgn0261053	30	19	28	23	40	34	15	31	78	40	9	48	10	6	11	12	11	3	20	21
FBgn0259740	119	307	88	248	230	300	231	188	274	245	143	243	204	189	198	259	565	366	338	230
FBgn0037841	0	2	2	3	4	7	3	6	10	0	2	4	8	3	4	2	12	9	2	5
FBgn0037842	507	410	432	800	764	583	793	673	947	740	527	728	900	708	741	402	632	471	456	658
FBgn0037843	318	224	236	344	349	320	310	316	579	351	278	529	573	652	340	409	352	204	197	285
FBgn0037844	18	26	7	29	34	26	24	16	32	13	10	30	23	18	18	24	25	2	0	26
FBgn0037845	20	5	6	7	4	15	11	13	10	12	9	8	3	11	8	3	25	10	14	32
FBgn0037846	150	93	159	359	224	215	246	253	304	266	195	225	305	225	261	141	339	187	271	213
FBgn0267376	417	223	241	378	453	406	435	415	468	457	372	428	342	536	287	322	405	356	316	219
FBgn0037848	62	52	53	52	54	89	83	41	83	64	52	62	65	49	36	45	68	37	56	58
FBgn0011768	1099	1146	1226	942	1168	1512	1476	1356	1448	1213	697	826	989	780	910	510	862	566	904	1465
FBgn0037849	11	6	4	11	12	17	9	7	12	9	5	13	16	7	12	13	19	3	1	16
FBgn0022359	341	880	1262	2033	2242	1541	1341	2240	2628	2408	400	586	857	352	606	349	290	296	335	533
FBgn0266705	7	2	8	5	20	7	1	2	12	15	31	11	21	12	7	20	10	6	5	5
FBgn0037850	1	10	9	7	8	12	6	8	12	24	65	24	47	28	7	24	20	9	6	12
FBgn0037852	133	171	205	273	388	232	235	345	534	370	217	362	254	234	173	713	327	251	317	309
FBgn0037853	56	38	25	47	64	55	54	53	86	63	52	114	52	45	21	65	65	35	35	40
FBgn0037856	42	15	19	39	33	29	24	27	67	31	13	32	29	29	28	56	34	33	26	29
FBgn0042094	1869	1001	1041	2523	1695	859	2547	1343	2482	1766	1153	2020	1788	1371	1426	648	1245	827	1030	1341
FBgn0037855	118	108	117	168	166	166	148	191	237	138	87	164	173	141	104	111	112	92	113	133
FBgn0267137	5	3	1	5	5	3	5	6	4	8	5	9	9	8	4	10	14	0	2	9
FBgn0267138	15	6	5	2	7	14	6	11	10	7	5	8	15	16	11	15	6	4	1	7
FBgn0037857	0	0	0	4	0	2	1	0	2	0	27	38	62	66	26	68	44	11	6	14
FBgn0267121	0	0	0	0	0	0	0	0	0	0	0	0	0	0	0	0	0	0	0	0
FBgn0083950	15	20	1	4	12	13	8	2	22	7	2	26	11	3	5	7	21	3	1	13
FBgn0267671	0	0	0	0	0	0	0	0	0	0	0	1	0	0	0	1	0	0	0	0
FBgn0266245	0	0	0	0	0	0	1	0	0	0	1	0	1	3	0	0	1	0	0	0
FBgn0263403	0	0	0	0	0	0	0	0	0	0	1	0	0	0	0	1	0	0	0	0
FBgn0267139	0	0	0	0	0	0	0	0	0	0	0	2	0	0	1	0	0	0	0	0
FBgn0037860	0	0	0	0	0	0	0	0	0	0	22	9	30	32	31	31	31	6	2	7
FBgn0040256	302	644	236	207	391	670	456	495	1314	797	195	124	115	200	69	1945	1291	1261	1266	566
FBgn0037862	0	0	0	0	0	0	0	0	1	0	44	45	97	90	44	102	42	2	23	17
FBgn0261291	0	0	0	0	0	0	0	0	0	0	0	0	0	0	0	0	0	0	0	0
FBgn0040251	2	9	7	4	5	9	8	3	29	9	0	4	0	3	2	59	29	28	27	6
FBgn0040257	12	5	12	4	4	14	21	5	4	8	1	6	3	2	2	5	4	3	10	2
FBgn0040259	183	193	211	39	82	192	164	152	501	176	175	145	44	175	29	1915	791	298	874	361
FBgn0027584	0	0	0	0	0	2	0	1	0	0	0	0	0	1	2	2	3	2	1	0
FBgn0040253	31	1	2	4	3	5	5	2	12	1	1	5	1	9	5	0	35	0	22	3
FBgn0040255	8	0	3	7	6	11	14	8	5	6	1	12	2	4	4	3	9	10	9	2
FBgn0026314	72	26	23	176	50	87	147	68	62	207	97	162	76	184	92	52	174	264	172	23
FBgn0026315	421	239	277	234	292	490	518	400	433	320	467	386	298	471	252	937	878	234	747	474
FBgn0040250	31	8	20	0	9	44	38	11	30	18	48	33	2	64	2	3	60	2	30	9
FBgn0040252	61	44	43	1	16	102	119	24	44	31	63	38	1	125	1	2	108	7	40	45
FBgn0037870	14	4	3	9	4	13	15	11	9	17	10	8	9	4	6	7	28	2	7	1
FBgn0261808	448	334	347	241	396	488	661	403	375	238	155	282	222	173	251	174	396	182	290	378
FBgn0037873	1273	790	714	1040	1044	1092	1528	1057	1267	986	786	1255	1147	1304	890	472	1135	631	909	801
FBgn0037874	6119	5902	6454	8296	8573	8096	9538	8613	10935	8997	5017	6472	7199	5506	5946	5215	5794	5789	5350	8620
FBgn0037875	378	376	391	702	688	503	615	645	960	845	717	591	627	559	481	282	510	329	403	603
FBgn0086472	8896	8785	7746	10426	11208	11759	15196	10011	12021	10325	6051	8281	9704	9525	8833	7033	10739	12906	7312	9232
FBgn0037876	50	22	19	52	59	43	47	33	97	58	64	92	128	128	46	74	83	36	17	54
FBgn0037877	72	58	42	63	62	75	64	66	102	63	30	73	53	70	44	51	67	37	46	46
FBgn0037878	100	75	58	127	119	117	111	95	200	113	140	223	297	306	149	205	210	95	69	116
FBgn0020910	14630	13242	15318	15267	18243	17197	18319	20710	21164	19947	7744	9965	13980	9076	9407	12513	11160	10469	11942	15246
FBgn0086055	0	0	0	4	7	1	1	3	2	2	1	0	1	0	1	0	1	0	2	1
FBgn0051144	0	0	0	0	0	1	1	1	1	1	11	11	11	23	2	17	5	3	2	5
FBgn0086056	0	0	0	0	0	0	0	0	0	0	0	0	0	0	0	0	0	0	0	0
FBgn0065064	14	10	23	18	28	8	12	11	26	16	8	8	3	9	6	1	10	17	11	9
FBgn0086057	2	6	9	6	4	4	9	2	9	2	4	5	0	2	4	3	5	10	2	4
FBgn0037879	5	15	21	9	10	23	17	10	11	11	5	12	13	9	22	2	14	12	13	19
FBgn0037880	163	86	126	146	179	153	178	167	173	129	77	173	164	189	90	106	141	96	99	103
FBgn0037881	251	153	211	232	284	276	261	269	378	245	168	264	328	289	188	215	201	99	142	196
FBgn0037882	41	43	49	38	65	52	62	40	73	41	28	42	32	39	54	125	51	43	29	46
FBgn0037883	54	63	71	104	118	94	117	108	111	101	38	68	75	85	85	66	94	129	63	92
FBgn0037884	79	79	62	97	92	127	90	86	176	135	100	180	240	308	138	191	207	108	99	105
FBgn0037885	61	62	42	108	82	91	119	85	109	78	83	106	165	127	104	86	116	68	65	95
FBgn0051441	44	26	16	33	30	43	35	39	30	15	9	30	28	48	28	30	30	21	19	22
FBgn0051388	20	14	9	17	21	25	17	22	26	16	21	28	23	29	14	20	22	12	12	15
FBgn0037888	3	1	2	0	0	1	3	0	0	2	4	5	5	6	3	4	4	3	6	0
FBgn0037889	1	4	0	1	0	1	2	4	0	1	0	3	4	3	3	1	0	1	1	1
FBgn0037890	799	571	585	2257	1358	810	1456	1120	2771	1831	1364	2395	2309	2030	1804	1223	1763	1696	1391	1797
FBgn0037891	1520	1075	1136	1759	1922	1692	1961	1882	2352	2135	1628	1952	2449	2168	1469	969	1955	1390	1577	1656
FBgn0262972	767	1160	111	1070	1197	1735	259	248	2305	681	24	1250	752	44	662	536	1469	57	5	812
FBgn0051386	3	5	0	12	11	15	4	0	8	1	0	10	7	1	3	2	12	1	0	1
FBgn0284418	0	0	0	0	0	0	0	0	0	0	0	0	0	0	0	0	0	0	0	0
FBgn0266415	0	0	0	0	0	0	0	0	0	0	0	2	0	1	0	0	0	0	0	0
FBgn0004595	26	36	10	46	40	69	25	15	94	36	4	67	64	13	60	50	97	6	7	42
FBgn0267672	0	0	0	0	0	0	0	0	0	0	0	0	0	0	0	0	0	0	0	0
FBgn0026064	0	0	0	0	0	0	0	0	0	0	0	0	0	0	0	0	0	0	0	0
FBgn0026063	0	0	0	0	0	0	0	0	0	0	0	0	0	0	0	0	0	0	0	0
FBgn0267673	0	0	0	0	0	0	0	0	0	0	0	1	1	0	1	1	0	1	0	0
FBgn0267674	0	0	0	0	0	0	0	0	0	0	0	0	1	0	1	3	2	0	0	0
FBgn0037892	329	265	276	307	361	316	475	324	331	285	165	344	349	369	271	195	290	256	207	238
FBgn0264694	422	321	326	416	450	477	475	414	669	491	345	437	546	572	428	370	366	278	243	416
FBgn0011774	58	79	118	61	74	102	63	89	100	66	52	80	86	89	48	280	89	76	98	86
FBgn0263480	0	1	0	0	1	0	0	0	0	0	0	0	0	0	0	0	0	0	0	0
FBgn0037894	463	351	461	508	499	483	431	501	747	545	248	527	653	545	400	508	461	225	348	421
FBgn0037895	13	17	2	24	26	24	4	7	24	24	0	20	10	0	8	9	37	1	0	17
FBgn0267236	0	1	0	0	0	1	0	0	0	0	0	1	0	0	0	0	1	0	0	0
FBgn0037896	0	2	2	1	4	2	1	4	5	5	0	0	0	0	0	2	0	1	0	4
FBgn0037897	196	161	210	244	276	211	194	349	379	282	219	201	269	199	130	189	132	99	163	254
FBgn0037898	33	28	24	24	32	37	37	22	26	20	8	31	33	22	18	12	25	14	13	11
FBgn0037899	714	705	747	855	1088	1010	1100	887	1098	878	357	702	770	889	615	708	770	833	459	588
FBgn0037900	111	91	79	107	115	142	139	111	225	156	137	195	237	294	179	217	183	100	92	133
FBgn0037901	149	146	135	168	199	201	218	196	267	192	144	208	216	254	163	209	220	134	136	154
FBgn0037902	66	38	19	62	55	56	51	55	105	67	59	118	143	148	57	83	66	26	13	36
FBgn0051374	15	8	8	6	12	22	8	15	27	19	10	93	3	4	2	4	24	2	26	5
FBgn0046225	28	26	13	36	18	41	19	27	64	31	88	109	179	188	89	173	98	33	18	51
FBgn0263520	0	0	0	0	0	1	0	0	0	0	0	0	0	0	0	0	0	0	0	0
FBgn0037906	164	80	100	57	93	110	107	95	93	91	55	62	65	36	44	68	77	37	129	86
FBgn0267141	0	0	0	0	0	0	0	0	0	0	0	0	0	1	2	0	0	0	0	0
FBgn0037908	8	8	2	4	3	2	2	0	10	2	0	5	8	1	4	2	12	0	1	7
FBgn0053512	5	17	4	8	6	19	2	4	16	7	0	10	9	0	2	9	17	1	0	18
FBgn0266416	0	0	0	0	0	1	0	0	2	0	8	1	14	16	6	6	9	2	0	2
FBgn0037910	49	24	19	60	41	70	35	27	111	49	105	197	265	312	140	180	179	56	34	60
FBgn0037911	66	34	27	48	68	64	69	40	70	49	53	103	110	147	72	88	100	29	37	63
FBgn0037913	989	1169	844	1773	1454	2019	2566	1265	1995	1684	1625	1597	2135	2158	2326	502	1732	1156	905	1959
FBgn0037912	8	9	6	3	4	2	3	8	3	10	5	5	2	4	2	5	5	4	2	12
FBgn0263316	237	290	343	456	440	420	304	626	886	679	344	361	385	326	253	2217	773	757	1124	661
FBgn0037915	60	34	32	119	82	97	40	42	220	102	239	381	563	654	264	521	337	95	71	162
FBgn0037916	20	15	9	29	22	37	21	20	66	42	70	103	153	153	75	112	94	14	11	38
FBgn0037917	87	65	57	83	69	133	93	77	100	87	111	137	100	134	81	105	140	69	67	75
FBgn0037918	208	120	103	209	173	230	116	143	327	210	144	259	277	291	145	216	180	85	113	147
FBgn0051363	175	158	63	234	173	283	139	137	360	191	266	445	580	561	319	610	444	114	153	228
FBgn0037920	54	34	28	56	49	79	56	41	97	47	44	82	73	104	46	69	67	31	33	59
FBgn0037921	37	16	11	20	15	30	20	12	35	22	15	42	49	60	18	47	41	23	24	19
FBgn0037922	104	74	66	110	122	121	110	89	182	106	81	158	234	249	140	171	155	70	54	90
FBgn0037923	26	19	7	23	16	28	22	21	26	26	22	38	27	44	28	36	24	9	11	26
FBgn0042205	12	15	11	17	12	13	23	11	29	10	7	29	23	21	13	19	14	7	16	13
FBgn0037924	146	95	138	187	143	161	130	210	321	171	201	310	497	440	288	395	243	90	146	206
FBgn0262081	288	209	177	260	262	315	202	274	516	325	217	380	399	454	200	318	282	165	182	262
FBgn0264986	1	1	0	0	0	0	0	0	0	0	0	1	0	1	1	0	0	0	0	0
FBgn0037926	295	246	354	352	402	332	293	427	484	350	116	227	292	231	184	566	306	225	268	301
FBgn0259227	62	47	50	79	84	109	63	106	113	179	103	114	93	109	48	70	112	25	130	60
FBgn0037930	520	492	555	802	809	788	951	685	850	644	401	472	658	556	627	338	655	721	506	789
FBgn0037931	41	39	33	42	43	54	30	45	82	55	69	57	120	123	42	78	41	31	34	45
FBgn0011290	122	91	116	124	141	155	168	155	180	130	110	118	114	114	136	139	120	98	97	115
FBgn0037933	74	64	51	104	78	120	87	94	145	82	126	235	274	324	133	212	249	97	83	76
FBgn0037934	71	61	70	5	102	270	215	30	181	112	152	79	1	225	3	844	309	112	380	140
FBgn0037935	165	263	211	164	210	314	237	294	413	374	243	99	184	124	118	1735	740	463	992	561
FBgn0037936	84	141	23	27	47	128	96	46	70	103	109	125	50	157	44	38	116	77	126	77
FBgn0042110	22	14	8	1	2	30	20	5	11	3	2	6	7	11	6	0	17	3	5	11
FBgn0037937	2	0	1	1	1	2	0	0	0	1	0	3	4	1	1	0	2	0	0	0
FBgn0265271	0	1	0	1	0	0	0	1	0	1	15	8	22	22	11	16	11	5	1	7
FBgn0037939	9	10	7	37	10	23	10	20	76	35	235	292	550	621	282	488	275	78	48	125
FBgn0267675	0	0	0	0	0	0	0	0	0	0	1	0	0	0	0	0	0	0	0	0
FBgn0025821	1	2	2	13	7	6	4	7	13	12	66	82	109	143	67	91	78	25	16	25
FBgn0037940	14	8	0	0	0	0	1	0	0	0	6	1	0	9	0	0	6	1	5	0
FBgn0037941	7	23	2	20	15	18	9	1	29	16	22	56	51	50	32	23	32	9	6	30
FBgn0037942	200	203	290	573	450	272	491	356	562	396	262	339	411	401	358	313	335	236	214	303
FBgn0002906	67	38	44	70	68	58	42	43	119	65	62	135	207	171	113	119	78	27	39	88
FBgn0037943	269	232	251	312	339	308	287	342	476	311	216	343	475	448	298	369	320	181	147	230
FBgn0037944	198	143	156	219	276	206	173	202	459	243	219	341	417	380	165	299	190	107	142	206
FBgn0262364	0	0	0	0	0	1	0	0	0	1	0	0	2	1	1	0	0	2	0	0
FBgn0017581	1619	1376	1259	1543	1789	2191	1375	2009	2767	1930	1241	1777	2011	1839	1165	3651	1779	1583	1756	1623
FBgn0265276	89	94	26	139	114	183	56	42	231	72	15	170	135	23	90	95	183	25	4	148
FBgn0267155	0	0	0	0	0	0	0	0	0	0	0	0	0	0	0	0	0	0	0	1
FBgn0037949	98	65	66	123	124	140	86	104	197	141	93	202	313	232	121	230	156	47	51	116
FBgn0037950	2	0	0	2	3	0	2	0	1	1	3	6	10	10	8	9	10	3	1	2
FBgn0025802	170	131	114	197	196	207	137	207	350	236	180	317	401	380	180	349	173	70	106	180
FBgn0051116	323	127	268	328	337	247	261	397	346	321	205	224	175	166	153	106	234	98	245	205
FBgn0259139	591	404	413	664	710	689	512	680	1045	669	357	681	688	633	488	541	545	265	410	506
FBgn0019624	4349	3145	2976	4147	4325	4270	6054	4028	4806	4104	3101	4586	4772	4613	3799	1940	3809	2774	3151	3570
FBgn0037955	1183	793	795	1082	1133	887	1381	1103	1154	932	606	996	1041	745	803	530	740	430	732	856
FBgn0037956	20	14	4	21	11	19	9	18	34	21	18	39	19	26	15	22	26	4	11	27
FBgn0003312	48	46	0	30	19	168	56	1	61	32	1	51	87	4	41	14	84	32	14	98
FBgn0037958	85	69	80	104	80	115	95	101	163	96	68	110	135	134	84	117	127	68	66	84
FBgn0051368	220	126	135	156	219	176	122	212	280	218	101	222	200	168	130	209	163	62	121	165
FBgn0037960	22	16	10	30	29	18	22	18	41	22	10	37	43	21	30	66	38	22	28	20
FBgn0037962	0	0	0	5	1	4	0	0	11	2	40	46	103	124	62	67	48	18	12	17
FBgn0037963	48	42	28	38	51	61	42	61	100	53	26	93	64	53	34	65	54	19	47	42
FBgn0085336	0	0	0	0	0	0	0	0	0	0	2	1	5	4	1	2	3	0	1	0
FBgn0037964	2	0	2	4	0	3	4	0	1	0	28	17	46	50	27	46	15	7	6	5
FBgn0051211	302	192	177	308	256	375	269	346	409	358	192	365	402	403	228	233	321	192	191	241
FBgn0013275	2	7	1	0	0	10	2	0	5	3	0	1	1	3	0	1	0	0	0	0
FBgn0013276	25	14	7	8	12	65	5	9	33	19	3	7	10	10	2	2	1	0	1	1
FBgn0260741	56	35	29	81	58	58	79	59	107	72	75	102	134	157	72	99	100	44	32	58
FBgn0000147	29	22	14	55	50	48	21	28	80	36	93	134	199	238	100	137	161	49	25	37
FBgn0260742	242	172	213	262	258	298	262	231	408	294	215	329	314	386	237	272	304	153	222	217
FBgn0260743	168	136	101	97	142	243	335	109	164	136	102	225	130	254	97	92	233	87	154	130
FBgn0260744	242	233	150	336	291	288	421	243	430	298	464	492	454	542	364	459	502	463	422	479
FBgn0037970	0	0	1	2	1	0	0	1	3	1	33	31	51	82	28	38	34	18	7	9
FBgn0037972	10	9	0	2	6	1	5	1	9	3	5	23	2	9	1	3	6	3	5	4
FBgn0264984	0	2	4	5	1	3	4	1	0	2	6	4	2	5	6	12	0	8	8	3
FBgn0037973	344	341	468	426	416	477	505	477	511	592	329	427	524	374	444	356	409	417	453	419
FBgn0037974	19	46	47	29	29	56	31	27	45	50	41	15	20	30	22	28	20	40	23	50
FBgn0037975	34	67	109	61	71	83	60	89	104	83	67	32	66	48	53	124	105	56	107	95
FBgn0260745	942	557	435	384	520	507	547	531	678	660	272	563	319	273	269	246	377	162	474	347
FBgn0037976	23	8	0	8	18	35	50	4	16	4	17	47	4	69	3	2	26	2	19	8
FBgn0260746	549	578	684	621	755	830	823	778	691	617	432	407	502	356	483	940	466	269	635	689
FBgn0037978	166	129	122	172	222	216	177	194	238	209	190	247	281	272	180	181	179	92	108	174
FBgn0037979	152	115	108	150	174	208	121	149	303	181	169	252	353	360	201	273	223	87	128	145
FBgn0037980	38	35	24	39	50	46	28	23	68	33	64	56	130	133	89	106	86	18	29	38
FBgn0037981	24	14	27	33	21	24	29	31	43	27	33	32	36	40	19	34	30	19	11	19
FBgn0051358	0	0	0	0	1	0	0	0	0	0	1	1	2	1	0	0	1	0	0	0
FBgn0260230	0	0	0	0	0	0	0	0	0	0	0	0	0	0	0	0	0	0	0	0
FBgn0260231	0	0	0	0	0	0	0	0	0	0	0	0	0	0	0	0	0	0	0	0
FBgn0037985	0	2	2	29	7	13	0	6	50	23	204	271	436	521	237	389	228	71	78	111
FBgn0037986	1	0	0	0	0	0	0	0	1	0	12	5	36	34	18	22	15	4	0	3
FBgn0037987	5	0	2	14	10	8	0	5	21	7	76	90	171	203	79	127	80	42	13	32
FBgn0037988	5	13	2	24	14	19	5	8	65	17	149	197	349	449	175	250	206	60	43	73
FBgn0037989	125	194	54	99	155	204	91	125	196	198	73	89	95	82	73	100	211	179	153	103
FBgn0051361	31	43	4	45	48	31	24	26	66	31	176	226	388	411	185	309	175	72	60	84
FBgn0037992	321	55	0	0	0	19	77	0	0	0	7	11	17	14	13	6	1	4	2	2
FBgn0011905	0	0	0	0	0	0	0	0	0	0	0	0	0	0	0	0	0	0	0	0
FBgn0037993	11	5	2	7	6	6	2	0	7	3	0	9	7	2	1	3	6	0	0	6
FBgn0261714	0	0	0	0	0	0	0	0	0	0	0	0	1	2	1	1	0	0	0	2
FBgn0037994	0	0	0	0	0	0	0	0	2	0	60	72	133	118	76	101	48	5	7	17
FBgn0263404	0	0	0	0	0	0	0	0	0	0	2	0	3	4	0	2	3	0	0	0
FBgn0037995	0	0	0	4	0	2	0	1	2	0	47	64	94	130	50	49	37	13	11	27
FBgn0051356	0	0	0	0	0	0	0	0	0	0	0	0	0	0	0	0	0	0	0	0
FBgn0037996	571	283	263	942	976	535	610	145	565	1676	211	982	729	176	717	87	864	85	50	154
FBgn0037998	208	145	161	242	277	210	212	233	361	283	179	240	309	282	229	204	179	90	161	242
FBgn0037997	0	0	0	0	0	0	0	0	0	0	0	0	0	0	0	0	0	0	0	0
FBgn0037999	138	111	162	206	194	178	214	184	235	187	211	214	262	197	204	780	172	203	232	193
FBgn0267676	0	0	0	0	0	0	0	0	0	0	0	0	2	1	0	0	0	1	0	0
FBgn0038000	8	6	6	32	18	23	6	13	41	21	121	168	296	339	143	206	114	53	16	68
FBgn0038001	1	1	2	4	0	2	2	0	1	3	0	0	0	1	0	1	0	0	0	0
FBgn0038002	7	28	9	0	23	42	11	38	25	7	0	0	2	0	0	0	1	0	0	0
FBgn0263454	0	0	0	0	0	0	0	0	0	0	1	0	4	4	3	5	3	1	1	1
FBgn0038003	0	0	0	0	0	0	0	0	0	0	0	0	0	0	0	2	0	0	0	0
FBgn0011270	0	0	1	3	1	0	1	0	4	1	45	28	52	77	43	47	13	12	1	12
FBgn0038005	0	0	0	0	1	0	1	1	1	0	0	5	1	1	0	1	1	2	0	0
FBgn0038006	0	1	0	0	2	0	0	0	2	1	2	5	1	0	0	2	0	0	0	0
FBgn0038007	2	1	0	3	2	3	1	2	8	3	2	2	5	1	0	0	1	2	5	3
FBgn0264828	0	0	0	1	1	0	0	1	0	0	1	1	3	0	3	0	0	0	0	0
FBgn0267142	0	0	0	0	0	0	0	0	0	0	0	0	0	0	0	0	0	0	0	0
FBgn0038008	0	3	0	5	0	1	0	1	0	0	28	9	54	53	31	34	25	3	3	2
FBgn0267922	0	0	0	0	0	0	0	0	0	0	0	0	0	1	0	0	0	0	0	0
FBgn0003651	551	434	511	542	516	412	525	668	896	647	322	375	427	172	297	367	222	275	325	560
FBgn0264829	0	0	0	0	0	0	0	0	0	0	2	0	1	2	1	0	0	1	0	0
FBgn0264830	0	0	0	0	0	0	0	0	0	2	0	0	0	0	0	0	0	0	0	0
FBgn0267677	0	0	0	0	0	0	0	0	1	1	0	0	0	0	0	0	0	0	0	0
FBgn0264831	0	0	0	0	0	2	0	0	1	0	0	0	0	1	0	0	0	0	0	0
FBgn0038009	24	0	2	0	1	7	3	1	5	1	7	46	5	8	5	14	14	15	7	2
FBgn0259975	0	0	0	0	0	0	0	0	0	0	0	0	0	0	0	0	0	0	0	0
FBgn0267678	0	0	0	0	0	0	0	0	0	0	0	0	0	0	0	0	0	0	0	0
FBgn0038011	0	0	0	0	4	0	0	0	0	0	0	0	0	0	0	0	0	0	0	0
FBgn0051432	0	0	0	0	0	0	0	0	0	0	0	0	0	0	0	0	0	0	0	0
FBgn0038012	68	29	20	83	57	84	60	53	141	59	58	124	196	224	82	156	142	54	12	52
FBgn0267144	0	0	0	0	0	0	0	0	0	0	1	0	0	0	0	0	0	0	0	0
FBgn0267143	0	0	0	1	0	0	0	0	0	1	1	0	2	5	10	4	2	2	0	1
FBgn0266246	0	0	0	0	0	0	0	0	0	0	0	0	0	0	0	0	0	0	0	0
FBgn0266261	0	0	0	0	0	0	0	0	0	0	19	0	0	0	0	4	0	0	0	0
FBgn0038013	104	77	64	114	109	131	109	84	147	110	106	150	206	197	116	120	163	93	86	89
FBgn0038014	0	3	2	0	1	4	5	0	2	2	0	2	0	5	2	0	5	4	0	0
FBgn0038016	238	199	216	242	271	264	183	286	396	286	199	304	447	326	220	420	234	97	182	222
FBgn0038017	326	416	340	57	211	1111	342	346	168	246	36	122	15	36	10	6	69	9	103	30
FBgn0065094	0	0	0	0	0	0	0	0	0	0	0	0	0	0	0	0	0	0	0	0
FBgn0038018	0	1	0	0	0	0	0	0	0	0	9	5	14	21	11	3	6	1	2	0
FBgn0042206	106	162	113	256	249	219	138	151	511	425	694	96	315	276	411	1815	590	847	712	708
FBgn0038020	81	91	35	97	110	124	143	52	112	102	154	182	173	260	145	839	399	384	297	157
FBgn0001149	3172	2845	2212	3728	3892	4115	4432	2367	5420	4565	8209	3642	3690	5987	4091	7514	5510	4255	5380	5263
FBgn0267679	0	2	0	0	0	1	0	1	0	2	2	1	2	0	0	0	0	0	1	0
FBgn0010038	357	73	17	39	168	337	522	169	78	197	179	148	21	750	13	330	262	132	384	35
FBgn0010039	199	362	196	158	274	362	264	183	331	251	153	188	149	130	155	687	228	324	250	275
FBgn0010040	53	34	33	98	64	38	47	33	93	89	109	63	88	108	96	41	69	57	51	78
FBgn0010041	32	47	13	4	14	35	18	17	92	66	34	18	31	38	12	127	78	42	54	23
FBgn0010042	25	26	15	63	32	30	40	15	98	67	184	71	112	78	81	428	164	165	140	122
FBgn0010043	1994	1151	947	2308	1665	1038	3086	1018	2009	1508	2827	2480	2995	3012	3414	819	2297	2395	1701	2235
FBgn0010044	11	6	7	0	2	9	12	1	9	14	10	27	2	15	0	2	9	3	0	6
FBgn0038028	0	0	0	0	0	0	0	0	0	0	0	0	2	1	0	0	1	1	3	0
FBgn0038029	0	2	0	0	0	2	1	1	0	0	0	0	0	0	0	0	0	0	4	1
FBgn0085431	6	8	1	2	1	8	5	1	13	2	0	3	6	3	6	0	6	1	0	3
FBgn0053098	1	1	0	6	1	8	3	1	5	2	13	28	38	43	15	21	24	9	1	3
FBgn0038033	0	0	0	0	0	0	0	0	0	0	0	0	0	0	0	0	0	0	0	0
FBgn0038032	0	0	0	0	0	0	0	0	0	0	0	0	0	0	0	0	0	0	0	0
FBgn0038034	138	27	86	35	81	42	139	57	50	37	139	85	38	150	39	28	59	16	44	28
FBgn0286075	161	89	177	192	247	141	256	170	219	113	142	204	214	187	166	295	160	101	151	140
FBgn0038037	366	159	108	105	142	318	409	169	225	232	290	356	168	378	110	183	318	108	291	143
FBgn0038038	1628	1309	1623	2361	2472	1681	2788	1958	2617	2023	1412	1649	1775	1359	1489	887	1419	913	1633	2097
FBgn0038039	225	227	223	705	556	359	494	449	895	735	746	815	642	791	500	323	453	359	378	422
FBgn0000455	271	165	152	158	226	274	269	245	366	267	250	200	224	317	153	172	288	112	210	222
FBgn0065087	0	0	0	0	0	0	0	0	0	0	0	0	0	0	0	0	0	0	0	0
FBgn0082831	273	219	214	292	268	343	236	367	625	402	224	354	479	354	218	382	231	101	215	303
FBgn0038042	8	5	1	1	2	6	2	1	6	7	1	16	11	8	3	5	12	2	2	9
FBgn0038043	256	183	146	237	218	285	239	221	373	216	194	315	404	461	224	264	250	192	116	222
FBgn0004103	1130	859	851	1230	1210	1286	1152	1183	1889	1273	894	1373	1367	1371	1011	1119	1118	630	740	1088
FBgn0038045	4	7	0	2	7	10	3	0	4	1	3	5	5	2	7	4	9	1	0	6
FBgn0038046	263	211	178	283	277	336	264	286	513	307	261	479	630	564	306	363	330	171	176	293
FBgn0038047	3	11	9	6	7	4	6	4	14	12	4	13	13	16	12	11	15	3	2	7
FBgn0086134	1132	790	674	1052	1006	1134	1263	989	1441	959	971	1640	1775	1925	1287	1222	1450	944	909	1262
FBgn0029512	342	231	197	343	368	377	384	301	507	306	230	463	577	528	355	350	404	218	212	313
FBgn0038049	299	236	222	317	342	383	337	286	574	333	276	467	585	631	379	420	389	238	189	267
FBgn0043043	0	1	0	4	2	0	3	4	8	1	0	3	4	1	0	0	6	2	2	3
FBgn0038051	0	0	0	0	0	0	0	0	0	0	0	0	0	0	0	0	0	0	0	0
FBgn0286930	0	0	0	0	0	0	0	0	0	0	0	0	0	0	0	0	0	0	0	0
FBgn0086687	12596	7770	8885	22337	16871	9212	20532	15611	28641	20897	7269	14120	13148	6505	11206	9487	13054	8818	13972	16763
FBgn0286507	36	21	18	90	50	72	47	41	160	62	364	507	786	1051	491	703	564	150	108	193
FBgn0038053	64	52	46	74	85	65	70	93	121	78	55	78	87	46	80	39	51	50	46	93
FBgn0038054	0	1	0	4	4	2	1	1	9	6	24	21	45	50	21	31	34	14	3	7
FBgn0038055	153	134	119	136	192	170	164	146	232	131	46	147	182	175	111	166	149	101	100	110
FBgn0038056	84	76	90	94	118	71	157	44	88	70	46	89	84	86	61	66	46	72	44	95
FBgn0038057	75	58	66	80	134	104	111	93	99	67	30	73	71	68	62	66	95	65	48	61
FBgn0038058	81	56	36	55	85	76	68	87	103	64	41	101	102	83	60	71	103	38	74	65
FBgn0013277	5	3	0	1	0	35	0	1	18	9	0	0	1	1	0	9	3	2	4	7
FBgn0052865	1	1	1	1	0	6	0	0	5	0	0	1	1	2	1	1	2	2	0	1
FBgn0051354	0	0	0	0	0	0	0	0	0	0	0	0	0	0	0	0	0	0	0	0
FBgn0267866	0	0	0	0	0	0	0	0	0	0	0	0	0	0	0	0	0	0	0	0
FBgn0013278	13	1406	0	2	7	1426	1	1232	4274	3068	1	3	5	7	2	3607	1047	421	2196	2192
FBgn0267867	0	0	0	0	0	0	0	0	0	0	0	0	0	0	0	0	0	0	0	0
FBgn0013279	1	5	1	2	2	22	2	1	1	2	0	1	4	5	2	3	3	0	0	1
FBgn0250910	5	13	1	10	15	13	3	5	12	3	0	11	5	1	2	7	13	3	0	13
FBgn0028374	13	38	2	9	44	52	10	0	37	10	0	43	36	3	19	16	45	0	2	13
FBgn0267680	0	0	0	0	0	0	0	0	0	0	2	2	2	3	1	1	4	0	0	1
FBgn0038063	15	6	3	9	2	7	7	7	10	9	15	57	32	27	12	7	14	4	3	5
FBgn0262383	0	0	0	0	0	0	0	0	0	0	0	0	0	0	0	0	0	0	0	0
FBgn0267681	0	0	0	0	0	0	0	0	0	0	1	1	4	1	1	1	0	0	0	0
FBgn0266247	0	0	0	0	0	0	0	0	0	0	0	0	0	0	0	0	0	0	0	0
FBgn0005671	3818	1939	1803	2721	2907	3614	3481	3525	3543	3662	2752	4102	2309	4617	1849	1899	4384	2002	5317	1673
FBgn0038065	601	547	426	840	704	673	826	659	1042	766	941	1029	920	1165	773	693	734	574	552	787
FBgn0260444	117	141	121	124	146	157	176	135	232	130	104	162	182	200	134	174	171	107	99	151
FBgn0042207	2	0	1	3	1	2	0	2	4	2	1	0	2	7	0	3	4	1	3	3
FBgn0267682	0	0	0	0	0	0	0	1	0	0	0	0	0	0	0	0	0	0	0	0
FBgn0038067	0	0	0	3	0	0	0	0	1	0	3	3	7	4	2	0	1	1	0	3
FBgn0038068	1	0	0	0	0	0	0	0	0	0	0	1	0	0	0	0	0	0	0	0
FBgn0038069	0	0	0	0	0	0	0	0	0	0	0	0	0	0	0	0	0	0	0	0
FBgn0038070	3	7	8	2	1	16	4	5	5	1	0	1	1	1	5	0	2	0	0	0
FBgn0286031	0	0	0	0	0	0	0	0	0	0	0	0	0	0	0	0	0	0	0	0
FBgn0038071	8	6	1	11	4	6	4	3	16	5	8	11	22	3	8	15	20	2	2	11
FBgn0038072	38	38	42	20	30	62	36	55	30	83	75	40	124	58	65	79	75	38	49	84
FBgn0267146	0	0	0	0	0	0	0	0	0	0	0	0	0	0	0	0	0	0	0	0
FBgn0038073	8	0	0	0	0	1	2	0	2	0	0	4	1	3	0	0	1	0	0	0
FBgn0038074	5738	4330	6794	4999	12526	8173	6066	13433	7531	7679	3165	2498	4867	2168	3509	487	1986	978	1236	2255
FBgn0263621	3	1	2	3	1	0	5	0	6	2	2	1	1	3	1	1	8	3	1	4
FBgn0026207	187	132	112	211	203	208	181	191	346	230	182	292	470	414	196	280	272	145	83	180
FBgn0038076	23	5	5	1	4	3	6	4	0	2	2	6	3	4	1	1	4	1	3	1
FBgn0001296	65	65	44	90	73	74	51	88	87	107	63	68	70	79	37	102	82	44	38	42
FBgn0005355	169	93	108	150	159	161	142	153	230	159	150	234	199	223	141	159	174	73	75	158
FBgn0051347	2	2	0	3	1	3	0	0	4	0	26	43	54	70	32	47	50	8	7	25
FBgn0011745	430	300	246	447	433	514	512	426	610	408	360	534	583	608	411	369	555	305	337	359
FBgn0038078	0	0	2	1	1	0	0	0	3	0	13	5	36	35	13	17	17	8	2	6
FBgn0038079	2	0	0	1	1	21	0	0	0	11	1	20	1	4	0	2	61	0	1	1
FBgn0016693	1970	1161	1545	1692	1670	1659	2195	2015	2461	2039	1131	1684	1584	1751	1233	853	1412	984	1285	1178
FBgn0038080	74	67	74	102	91	95	108	91	121	93	76	67	88	66	103	52	99	75	60	97
FBgn0002905	117	68	44	96	117	109	69	103	242	99	48	125	225	137	90	123	116	47	47	82
FBgn0002719	5402	2771	2066	7806	4793	3094	6615	5079	11897	8738	5032	7257	7855	4555	5084	3799	5595	2092	6616	6806
FBgn0265162	0	1	0	6	1	3	0	0	1	0	1	7	12	13	11	14	12	3	0	1
FBgn0038082	107	615	72	44	102	289	140	159	1601	1063	64	57	31	83	18	18378	4040	2566	4665	1461
FBgn0038083	68	330	48	23	39	187	83	81	1276	670	53	48	21	80	19	38673	5120	3808	7472	2001
FBgn0267958	2	0	0	0	0	1	0	2	1	0	1	2	5	6	1	2	1	0	0	1
FBgn0038084	7	5	3	7	5	9	1	3	9	3	0	3	3	4	8	6	4	1	1	5
FBgn0265164	0	0	0	0	0	0	0	0	0	0	0	0	0	0	0	0	0	0	0	0
FBgn0265163	0	0	0	0	0	0	0	0	0	0	0	0	0	0	0	0	0	0	0	0
FBgn0051345	4	0	0	0	1	0	0	0	0	0	0	6	0	0	0	0	2	0	0	0
FBgn0267937	0	0	0	0	0	0	0	0	0	0	0	0	0	0	0	0	0	0	0	0
FBgn0038087	6	12	1	5	2	13	3	4	11	4	0	12	8	0	6	0	8	2	0	6
FBgn0267147	0	0	0	0	0	0	0	0	0	0	1	0	0	0	0	0	0	0	0	0
FBgn0265165	0	0	0	0	0	0	0	0	0	0	0	0	0	0	0	0	0	0	0	0
FBgn0038088	44	30	5	61	20	53	46	19	54	46	111	145	165	249	152	153	193	96	58	74
FBgn0267938	0	0	0	0	0	0	0	0	0	0	0	0	2	0	0	0	0	0	0	0
FBgn0265166	0	0	0	0	0	0	0	0	0	0	0	0	0	0	0	0	0	0	0	0
FBgn0038089	0	0	0	1	2	2	0	1	1	0	14	10	26	50	12	25	21	3	0	2
FBgn0053929	0	0	0	0	0	0	0	0	0	0	0	0	0	0	0	0	0	0	0	0
FBgn0038090	0	0	0	0	0	0	0	0	0	0	6	3	12	9	9	9	10	2	1	1
FBgn0038092	5	6	0	3	1	7	2	2	8	6	3	12	5	2	13	8	9	2	1	10
FBgn0265167	0	0	0	0	0	0	0	0	0	0	0	0	3	1	0	0	2	0	0	0
FBgn0040493	798	446	604	383	493	580	620	648	816	467	363	569	726	686	411	506	460	205	306	370
FBgn0087021	42	30	26	65	29	71	43	31	79	28	21	76	67	117	53	42	65	28	14	33
FBgn0038095	67	80	232	311	342	167	135	411	390	401	286	267	124	145	62	80	61	34	74	68
FBgn0038097	2	1	2	4	3	0	1	5	24	10	40	76	68	92	39	60	67	19	10	20
FBgn0038098	351	118	153	0	4	144	150	66	511	77	109	110	7	115	1	5	337	2	140	168
FBgn0038099	1	1	0	2	4	3	1	3	0	1	1	1	3	0	1	1	1	1	5	0
FBgn0038100	238	230	185	306	328	451	265	269	505	301	406	647	785	1101	492	684	564	280	141	259
FBgn0051342	164	109	60	106	122	130	87	115	233	163	92	220	240	197	104	182	159	47	53	117
FBgn0038102	0	0	0	1	0	0	0	0	2	1	17	9	37	43	17	16	20	3	4	8
FBgn0041710	27	34	23	43	49	57	49	70	38	51	12	19	25	23	24	156	70	57	71	51
FBgn0038105	364	302	500	446	612	505	538	753	434	448	180	215	340	144	263	370	241	160	264	263
FBgn0038106	124	112	82	113	145	132	165	106	143	114	83	156	195	213	114	139	149	104	67	93
FBgn0265083	0	0	0	0	0	0	0	0	0	0	0	0	0	0	0	0	0	0	0	0
FBgn0038107	0	0	0	0	0	0	0	0	0	0	0	0	0	0	0	0	0	0	0	0
FBgn0038108	524	268	261	342	432	454	279	492	749	368	269	461	671	488	315	459	287	113	206	298
FBgn0038110	162	110	66	101	144	154	143	144	213	142	91	142	120	162	91	97	145	74	97	95
FBgn0038109	1	1	0	12	1	3	0	2	12	4	68	101	178	201	96	122	76	28	16	27
FBgn0020496	1198	836	942	1095	1135	1129	1036	1212	1801	1202	726	1058	1071	860	669	1180	913	744	882	1091
FBgn0283438	457	403	446	658	592	649	613	685	962	739	702	770	1105	1038	712	662	700	440	439	753
FBgn0283439	4	1	1	1	0	1	1	1	1	2	13	13	17	22	12	11	8	6	4	5
FBgn0002354	79	74	66	99	68	82	130	64	96	112	68	123	126	119	113	75	124	113	60	100
FBgn0003308	299	195	275	223	341	259	266	316	250	302	164	162	205	151	173	355	195	209	360	338
FBgn0038113	3	6	1	1	9	2	7	2	7	3	2	12	3	1	2	5	6	7	8	2
FBgn0003450	0	4	0	1	0	4	3	0	0	0	6	14	3	10	4	2	2	2	2	0
FBgn0038114	5	2	0	9	9	9	3	4	13	12	1	12	4	4	4	1	8	1	1	6
FBgn0266615	0	0	0	1	0	0	0	0	0	0	2	0	1	0	1	1	2	0	0	1
FBgn0001217	72	31	38	127	74	127	52	73	287	115	321	413	736	901	403	550	370	151	61	199
FBgn0051157	0	0	0	0	0	0	2	0	0	0	1	1	5	2	0	2	0	1	0	0
FBgn0038115	738	618	772	1185	976	909	1002	1055	1237	1130	820	926	1169	715	1239	408	1011	780	996	1466
FBgn0260962	687	542	546	762	794	800	556	843	1256	827	417	832	964	882	568	690	644	340	427	546
FBgn0004666	0	2	0	1	4	1	0	1	8	1	4	3	2	8	0	2	10	1	1	1
FBgn0266302	0	0	0	0	0	0	0	0	0	0	0	0	0	0	0	0	0	0	0	0
FBgn0262365	0	0	0	0	0	0	0	0	0	0	0	0	0	0	0	0	0	0	0	0
FBgn0038118	75	45	95	91	93	109	103	114	107	99	62	86	119	93	89	48	115	61	57	110
FBgn0085337	6	3	0	12	14	14	6	10	9	9	29	38	65	90	30	58	52	16	6	13
FBgn0267683	1	0	0	0	0	0	0	0	0	0	2	0	3	0	1	3	0	0	0	0
FBgn0260793	31	19	2	17	12	22	6	10	29	9	0	24	15	1	16	16	17	3	0	28
FBgn0266578	0	0	0	0	0	0	0	0	0	0	0	0	0	0	0	0	0	0	0	0
FBgn0038122	0	0	0	1	0	0	0	0	1	0	23	15	36	51	35	36	22	2	5	8
FBgn0038123	0	0	0	0	0	0	0	0	0	0	12	3	8	10	13	23	5	1	4	3
FBgn0038124	0	0	0	0	0	0	0	0	0	0	6	6	13	23	8	12	10	2	2	5
FBgn0038125	8	2	5	20	12	23	6	9	29	15	53	63	110	139	57	108	71	38	11	19
FBgn0038126	14	14	5	7	17	24	24	8	27	38	10	69	4	16	4	5	28	4	8	6
FBgn0038127	0	0	0	0	0	0	0	0	2	0	29	22	53	47	25	45	22	8	5	13
FBgn0000024	118	76	72	67	88	158	95	121	125	99	73	89	57	56	62	50	96	25	47	85
FBgn0040551	181	154	177	254	321	332	299	287	325	391	143	182	208	219	72	135	277	100	201	77
FBgn0038128	50	32	42	60	46	67	54	56	77	59	41	78	129	113	72	78	79	32	33	40
FBgn0003598	168	136	102	165	149	176	96	202	281	191	115	204	292	207	159	161	139	61	71	155
FBgn0038129	202	210	265	419	384	342	312	398	505	458	317	314	346	320	315	184	223	206	207	378
FBgn0038130	21	48	40	92	126	597	20	118	221	430	15	298	7	19	9	6	83	4	39	14
FBgn0038131	0	0	0	0	0	0	0	0	0	0	0	0	0	0	0	0	0	0	0	0
FBgn0038132	294	39	7	0	2	12	60	0	3	0	2	2	0	2	0	0	1	0	1	0
FBgn0038133	0	0	0	0	0	1	0	0	0	0	0	0	0	0	1	0	0	0	0	0
FBgn0038134	0	0	0	0	3	5	11	0	0	0	3	6	0	10	0	1	4	0	4	0
FBgn0038135	1280	282	701	24	76	763	566	562	1332	370	632	397	30	1126	20	20	2055	16	717	858
FBgn0038136	632	150	371	0	646	1716	2942	224	408	112	852	1280	2	3131	1	2	1362	0	940	240
FBgn0052473	880	563	929	478	1613	3185	4402	927	1094	521	1831	2502	721	4856	401	441	2046	224	1451	677
FBgn0262844	0	1	4	1	0	10	11	4	15	0	4	12	0	20	0	0	13	0	1	12
FBgn0264991	0	0	0	0	0	0	0	0	0	0	0	0	0	0	0	0	0	0	0	0
FBgn0286885	0	0	0	0	1	0	0	0	3	0	0	0	1	0	4	0	0	0	0	0
FBgn0266455	0	0	0	0	0	0	0	0	0	0	0	0	0	0	0	1	0	0	0	0
FBgn0038139	1	1	0	0	1	6	3	1	6	1	0	4	1	0	1	0	5	0	1	2
FBgn0038140	9	7	1	4	1	8	10	2	9	3	2	2	4	0	1	2	10	3	4	9
FBgn0045442	0	0	0	0	0	0	0	0	1	0	0	0	0	0	0	2	0	0	0	0
FBgn0086371	374	380	282	635	550	513	694	474	801	617	831	1081	1077	1158	936	511	801	563	448	692
FBgn0027610	1992	1591	1746	3680	3460	2388	3497	3355	4467	4188	2728	3878	3419	3232	2973	1387	2606	2087	2316	3070
FBgn0038142	0	0	2	0	2	0	4	0	1	0	0	1	1	2	2	1	1	1	1	0
FBgn0023495	5	3	2	6	9	5	9	12	10	7	0	2	2	1	0	6	2	5	10	5
FBgn0259831	0	0	0	0	0	0	0	0	0	0	0	0	0	0	0	1	0	0	0	0
FBgn0038143	9	70	6	29	15	61	11	8	38	42	3	26	21	7	5	69	64	106	15	58
FBgn0264987	8	91	2	4	22	87	11	15	55	73	5	7	3	14	2	1669	459	426	386	106
FBgn0038144	0	263	1	2	2	308	6	0	76	169	1	2	11	16	9	179	158	613	84	526
FBgn0044511	226	113	154	203	213	195	333	184	209	163	110	235	203	287	171	107	232	177	124	123
FBgn0038145	1755	1507	1607	3011	2378	2509	2294	2006	5164	3589	1916	2841	3313	3662	2014	2280	2506	1458	1412	1992
FBgn0038146	269	287	504	376	453	384	342	444	576	420	113	211	287	201	192	244	261	167	196	275
FBgn0038147	1381	787	593	1842	1247	929	2404	987	2157	1354	1291	2433	1733	1568	1479	277	889	868	777	971
FBgn0040553	0	1	0	0	0	0	0	0	1	0	0	80	0	0	0	0	1	0	0	0
FBgn0038148	2	0	0	3	0	0	1	1	0	3	0	141	0	0	0	2	5	0	0	0
FBgn0038149	181	167	79	198	192	223	250	166	412	289	580	770	534	504	448	337	555	252	538	520
FBgn0053977	62	54	52	75	82	86	118	71	89	79	73	96	111	121	77	57	136	75	83	84
FBgn0038150	0	0	0	1	0	0	0	0	0	0	1	0	0	0	1	0	1	0	0	1
FBgn0038151	0	0	0	0	2	18	3	2	1	0	4	60	1	0	1	0	0	0	0	0
FBgn0041711	3	1	0	1	0	2	1	0	3	5	3	40	0	3	0	0	2	1	23	3
FBgn0038153	0	0	0	0	0	0	0	0	1	0	3	0	1	0	0	0	0	2	0	0
FBgn0267151	0	0	0	0	0	0	0	0	0	0	1	2	4	4	3	1	3	0	0	1
FBgn0000046	256	91	102	41	61	226	118	177	349	211	132	622	52	191	50	41	328	28	631	137
FBgn0004049	125	75	58	147	106	139	101	117	253	169	140	251	343	258	149	186	208	74	101	121
FBgn0261814	0	0	0	0	0	0	0	0	0	0	0	0	0	0	1	0	0	0	0	0
FBgn0267239	0	0	0	0	0	0	2	0	0	0	0	0	0	0	0	0	0	0	0	0
FBgn0038156	20	14	0	10	8	22	11	7	28	9	8	33	9	6	10	14	24	6	6	16
FBgn0040554	0	0	0	0	0	0	1	0	0	0	0	0	0	0	0	0	0	1	0	0
FBgn0286034	2	0	0	0	4	4	4	0	5	3	7	1	2	4	4	6	0	1	1	3
FBgn0262323	0	0	0	0	0	0	0	0	0	0	0	0	0	0	0	0	0	0	0	0
FBgn0267574	2	0	0	0	0	0	0	0	1	1	5	0	5	1	1	1	1	2	0	2
FBgn0267149	0	0	0	0	0	0	0	0	0	0	1	0	0	1	0	0	0	1	0	0
FBgn0038157	0	0	0	0	0	0	0	0	0	0	0	0	0	2	0	1	0	0	0	0
FBgn0261846	1	0	0	3	0	1	0	0	2	0	18	24	24	36	13	22	12	7	3	3
FBgn0284419	0	0	0	0	0	0	0	0	0	0	1	0	0	0	0	0	0	0	0	0
FBgn0051337	5	23	6	10	14	39	23	18	24	25	15	13	14	6	30	22	56	22	39	12
FBgn0264430	0	0	0	1	1	1	0	0	0	0	0	0	1	0	1	0	0	0	0	2
FBgn0038158	17	6	2	27	11	17	11	13	40	18	35	49	86	101	40	64	68	27	4	23
FBgn0038159	2	0	1	0	0	0	0	0	0	0	0	6	0	7	2	0	1	0	0	0
FBgn0038160	0	0	0	0	0	0	0	0	2	0	0	7	0	0	0	0	0	0	0	0
FBgn0003060	164	62	0	0	3	171	4	1	14	21	0	354	0	0	1	6	0	1	1	3
FBgn0038161	43	25	1	3	4	4	19	14	55	22	12	47	0	50	0	0	29	71	92	0
FBgn0267240	0	0	0	0	0	0	0	0	0	0	0	0	0	0	0	0	0	0	0	0
FBgn0267154	0	0	0	0	0	0	0	0	0	0	0	0	0	0	0	0	0	0	0	0
FBgn0038163	19	14	14	79	29	36	19	30	101	41	235	284	516	556	254	395	223	65	59	96
FBgn0263396	3119	2217	3014	3104	3151	2807	2871	3883	4465	3612	1592	2624	2797	2081	2089	2175	2254	1720	2149	3312
FBgn0015778	1844	1124	1419	1683	1755	1765	1395	1701	3058	1856	1250	2036	2454	2054	1347	1855	1510	889	1074	1637
FBgn0010258	381	227	131	360	386	495	268	281	859	331	375	775	1040	1168	585	676	597	233	115	352
FBgn0004237	1077	847	856	1083	1257	1281	984	1119	1852	1155	986	1599	2047	2032	1391	1220	1412	811	681	1343
FBgn0004587	1515	1110	1379	1763	1719	1510	1470	1917	2350	1802	864	1577	1699	1411	1057	1112	1252	947	844	1431
FBgn0038165	21	14	6	16	25	45	13	11	38	8	1	19	25	3	18	14	45	4	0	24
FBgn0038166	159	116	112	156	136	160	165	146	235	173	147	235	239	254	144	177	197	102	95	154
FBgn0038167	226	148	131	192	189	209	208	216	345	220	173	320	414	361	181	286	210	109	125	188
FBgn0038168	171	148	117	174	189	233	197	212	336	185	166	216	294	330	192	248	198	139	94	184
FBgn0024555	310	220	227	386	417	337	246	391	596	391	224	386	447	352	219	303	303	132	170	277
FBgn0038170	1	4	2	4	2	1	1	4	5	4	5	4	1	5	1	2	6	3	2	3
FBgn0028487	112	110	75	127	144	175	109	157	284	138	134	217	339	366	184	298	205	92	98	137
FBgn0002937	0	1	0	0	0	0	0	0	2	0	2	0	0	6	1	0	2	0	0	0
FBgn0038172	131	256	507	526	784	535	383	806	622	620	90	96	205	65	135	62	110	104	157	241
FBgn0038173	14	11	11	31	30	8	9	19	31	35	3	9	8	6	4	6	11	4	8	9
FBgn0051469	3	6	4	9	6	4	4	3	4	4	7	8	5	6	7	8	14	5	13	7
FBgn0040077	0	0	0	0	0	0	0	0	0	0	0	0	0	0	0	0	0	0	0	0
FBgn0040076	0	0	0	0	0	0	0	0	0	0	0	0	0	0	0	0	0	0	0	0
FBgn0054044	0	0	0	0	0	0	0	0	0	0	0	0	0	1	1	3	0	0	3	0
FBgn0085412	56	41	17	38	43	49	33	32	85	49	6	74	39	13	34	27	60	12	17	41
FBgn0267383	2	1	0	14	3	9	0	4	19	8	94	115	205	281	107	118	98	57	17	35
FBgn0038179	73	47	41	55	56	116	122	66	39	65	83	42	21	92	28	45	69	126	78	8
FBgn0038180	41	65	46	15	101	61	65	90	91	154	2	3	1	14	0	2	4	1	5	0
FBgn0038181	162	48	40	31	34	136	120	44	154	109	102	1792	81	64	62	88	162	62	188	87
FBgn0260464	0	0	0	0	0	0	0	0	0	0	0	0	0	0	0	0	0	0	0	0
FBgn0259721	0	0	0	0	0	0	0	0	0	0	0	0	0	0	0	0	0	0	0	0
FBgn0038183	289	206	315	305	377	264	336	303	360	252	101	230	213	212	217	128	250	177	148	218
FBgn0000454	1388	815	1085	998	1108	1526	1530	1219	1842	1280	1428	1302	1215	1711	1005	1180	1648	680	1240	1307
FBgn0267150	0	0	0	0	0	0	0	0	2	0	0	0	0	0	1	0	0	0	0	0
FBgn0051588	0	0	0	0	0	0	0	0	0	0	0	0	0	0	0	0	0	0	0	0
FBgn0051331	0	0	0	0	0	0	0	0	0	0	0	0	0	0	0	0	0	0	0	0
FBgn0259730	0	0	0	0	0	0	0	0	0	0	0	0	0	0	0	0	0	0	0	0
FBgn0259732	0	0	0	0	0	0	0	0	0	0	0	0	0	0	0	0	0	0	0	0
FBgn0259731	0	0	0	0	0	0	0	0	0	0	0	0	0	0	0	0	0	0	0	0
FBgn0259733	0	0	0	0	0	0	0	0	0	0	0	0	0	0	0	0	0	0	0	0
FBgn0263650	3	2	0	1	0	0	2	0	1	1	0	0	2	2	0	1	2	1	0	0
FBgn0263651	1	0	0	0	0	0	1	0	0	0	0	0	0	0	0	0	0	0	0	0
FBgn0002862	35	24	21	92	32	78	28	39	106	46	266	448	622	969	348	429	478	199	75	119
FBgn0262992	0	0	0	0	0	1	0	1	2	1	3	3	1	2	1	3	0	0	0	0
FBgn0266464	325	273	282	349	366	375	328	392	553	407	255	325	391	325	217	543	358	297	360	387
FBgn0051495	13	20	13	22	26	21	27	16	31	30	25	21	21	21	23	17	27	13	8	20
FBgn0286915	0	0	0	0	0	0	0	0	0	0	0	0	0	0	0	0	0	0	0	0
FBgn0038186	2	1	0	12	1	2	0	2	7	1	31	35	80	84	35	54	51	19	4	12
FBgn0267959	0	0	0	0	0	0	0	0	1	0	4	0	1	6	1	2	2	0	0	2
FBgn0008646	1	2	3	3	4	4	1	3	8	7	1	8	6	3	4	1	1	0	0	4
FBgn0000576	20	16	11	13	15	33	19	10	25	20	13	14	11	6	3	16	5	8	13	16
FBgn0038188	2	0	0	3	4	3	2	3	5	6	15	21	38	37	20	37	17	7	4	13
FBgn0038189	21	10	13	39	36	23	23	31	68	32	41	80	105	145	73	83	61	30	18	27
FBgn0047199	18	13	5	28	30	26	16	9	43	11	11	27	32	35	10	21	36	12	4	6
FBgn0038190	62	27	24	57	66	86	63	73	107	53	48	104	118	194	74	79	77	59	8	40
FBgn0016672	102	62	59	119	95	107	98	96	124	58	60	137	150	165	81	85	145	70	47	71
FBgn0038191	106	62	33	58	105	104	64	101	149	65	40	104	140	141	63	75	65	26	14	51
FBgn0015270	29	28	47	32	34	44	27	56	54	43	30	43	55	38	29	23	24	19	28	38
FBgn0264493	379	341	358	352	518	537	379	520	595	462	225	400	416	324	222	449	324	504	286	464
FBgn0286041	0	0	1	0	0	0	0	0	0	2	0	2	2	0	1	0	0	0	0	0
FBgn0263414	0	0	0	0	0	0	0	0	0	0	0	0	0	0	0	1	0	0	0	0
FBgn0038194	240	527	468	373	674	1054	513	673	1045	943	498	310	280	367	264	3062	2061	1654	1850	1190
FBgn0038195	464	422	368	518	570	573	592	473	751	593	488	641	690	702	475	1129	772	428	625	538
FBgn0038196	413	379	376	495	575	505	680	466	605	429	281	390	484	526	406	323	447	343	311	386
FBgn0011971	0	0	0	0	0	0	0	0	0	0	0	0	0	0	0	0	0	0	0	0
FBgn0038197	286	197	263	226	236	230	267	307	306	281	174	197	246	140	162	163	186	196	196	302
FBgn0038198	19	18	27	18	63	44	73	72	63	117	18	64	11	59	9	25	45	12	34	6
FBgn0038199	5	3	2	2	1	6	4	3	11	2	3	8	1	5	0	1	11	0	0	9
FBgn0038200	11	8	10	68	22	43	5	23	120	40	368	508	821	1038	460	717	480	206	89	176
FBgn0038201	1	0	0	0	0	0	0	0	0	0	0	1	2	0	1	1	1	0	0	0
FBgn0038202	10	4	3	10	12	21	6	14	32	11	25	56	70	57	40	55	41	15	3	17
FBgn0265168	15	11	4	12	18	26	33	14	41	16	21	32	51	51	19	24	25	15	1	12
FBgn0038203	0	0	0	0	0	0	0	0	0	0	0	0	1	3	0	4	1	0	0	0
FBgn0038204	12	12	7	11	18	20	14	12	40	14	5	22	19	22	12	15	9	4	2	4
FBgn0038205	1	2	1	0	0	1	0	2	0	2	1	4	3	2	2	0	2	0	0	1
FBgn0020510	235	169	211	277	255	283	232	253	419	335	228	337	406	408	249	284	264	163	177	243
FBgn0038206	160	124	101	150	129	173	165	129	225	180	163	284	328	389	210	223	247	133	115	150
FBgn0010340	139	109	114	147	171	167	195	145	227	146	122	177	180	245	145	134	214	132	146	153
FBgn0262955	456	385	392	475	572	609	505	567	811	540	319	511	497	411	330	552	451	212	438	468
FBgn0038207	23	33	1	0	1	16	16	2	1	5	5	50	1	13	0	3	66	0	22	0
FBgn0038208	1	0	0	19	1	0	0	3	23	7	287	269	396	532	262	410	203	55	52	102
FBgn0260226	0	0	0	0	0	0	0	0	0	0	3	11	0	0	1	0	0	0	0	0
FBgn0038209	0	0	0	3	1	2	0	0	1	1	16	11	40	36	14	23	12	4	2	11
FBgn0265146	0	0	0	0	0	2	0	0	3	3	0	22	1	0	0	0	0	0	0	2
FBgn0051533	0	1	0	14	1	0	1	0	10	5	76	88	149	179	57	129	72	24	9	36
FBgn0051327	0	0	1	2	0	3	1	1	12	4	112	113	199	172	106	144	78	18	17	38
FBgn0038210	0	1	0	1	0	0	0	0	0	0	39	33	72	79	32	41	31	6	3	7
FBgn0011582	9	29	1	3	15	15	0	5	27	9	0	5	14	0	10	19	18	14	8	15
FBgn0038211	3	3	2	2	0	1	1	3	2	2	0	2	0	1	0	0	0	0	0	0
FBgn0051326	3	2	3	4	0	1	2	1	4	0	4	6	2	3	2	2	4	3	7	1
FBgn0053109	0	0	0	0	0	0	0	0	0	0	0	0	0	1	0	0	0	0	0	0
FBgn0053329	11	2	9	1	9	4	5	4	6	5	5	30	7	9	5	11	8	5	5	3
FBgn0027563	1	0	1	3	1	3	0	1	2	1	0	2	3	2	1	1	4	7	4	3
FBgn0038213	9	6	7	4	5	6	11	10	9	9	5	7	21	12	14	19	12	8	2	26
FBgn0262983	40	70	46	84	62	92	88	57	76	43	46	27	45	29	63	51	51	89	49	124
FBgn0038214	480	469	407	635	598	626	870	447	689	520	334	371	428	277	444	315	507	312	370	377
FBgn0027083	161	131	107	154	153	201	188	182	215	173	105	164	192	219	149	147	147	89	94	118
FBgn0262808	143	153	152	320	267	303	294	234	366	303	218	194	261	238	291	124	281	229	240	307
FBgn0038217	0	0	1	3	0	0	0	0	1	1	38	28	73	57	19	40	21	9	10	12
FBgn0038218	0	0	0	0	0	0	0	0	1	0	14	7	13	19	10	13	6	0	2	3
FBgn0038219	0	0	0	0	0	0	2	0	0	0	11	7	15	16	6	6	4	0	2	5
FBgn0003862	183	121	98	206	201	241	101	175	393	215	160	270	352	255	174	262	163	84	106	198
FBgn0267684	0	0	0	0	0	0	0	0	0	0	0	0	0	1	1	0	0	0	0	0
FBgn0267156	0	0	0	0	6	0	1	0	1	0	2	0	3	3	1	0	0	1	1	0
FBgn0285913	166	110	115	167	138	244	194	120	257	224	234	311	355	470	241	252	286	143	181	178
FBgn0038221	4	2	4	1	5	2	3	7	2	4	6	10	10	10	0	3	6	8	5	2
FBgn0003567	186	168	145	221	254	218	185	245	314	223	138	220	213	194	173	189	143	101	117	230
FBgn0004855	222	151	154	179	228	195	280	170	257	160	113	192	215	218	179	188	188	134	93	196
FBgn0051321	1	6	0	5	6	4	4	3	8	11	5	59	5	10	2	1	8	5	2	4
FBgn0013767	10	19	1	21	17	35	8	4	22	12	0	17	13	0	10	14	16	2	0	16
FBgn0011474	200	102	142	143	195	143	131	186	258	213	110	174	216	207	126	161	120	65	74	145
FBgn0038223	125	64	65	141	150	165	81	137	268	182	133	293	364	363	165	241	171	47	78	130
FBgn0038224	2456	1670	1616	2509	2526	2247	3584	2343	2632	2235	1697	2412	2589	2758	2245	1242	2495	2446	1766	2044
FBgn0003480	18	17	13	26	29	30	17	23	35	21	22	41	37	50	29	22	11	10	13	17
FBgn0024321	68	39	20	58	59	71	42	51	114	49	55	148	179	169	72	112	94	32	31	53
FBgn0051320	54	29	40	57	49	38	31	75	88	52	148	214	330	335	198	274	200	57	50	76
FBgn0086058	2	0	0	0	0	0	0	0	0	0	0	0	0	0	0	0	0	0	0	0
FBgn0266248	0	0	0	0	0	0	0	0	1	0	1	3	6	2	6	5	0	0	0	1
FBgn0038225	6	10	3	40	27	28	10	16	56	19	160	206	360	399	195	307	221	70	33	68
FBgn0285955	204	168	225	279	239	201	202	340	487	346	241	241	287	145	151	255	114	120	159	259
FBgn0262327	0	0	0	0	0	0	2	0	0	1	0	0	0	0	0	0	0	0	0	0
FBgn0085417	1	9	0	2	4	16	4	1	6	0	0	8	7	0	3	2	14	0	0	9
FBgn0265065	3	0	0	3	3	0	1	0	1	0	1	8	8	9	1	3	5	3	4	1
FBgn0265066	0	0	0	0	0	0	0	0	0	0	1	0	0	0	0	0	0	0	0	0
FBgn0038233	87	41	59	100	96	100	94	85	153	103	83	141	141	200	109	154	89	54	65	111
FBgn0038234	194	91	139	155	169	148	173	142	181	116	76	154	165	178	132	87	167	110	103	120
FBgn0038235	66	52	67	64	90	55	82	73	77	55	31	73	74	86	51	58	66	57	41	48
FBgn0038237	33	54	59	69	75	69	61	111	77	74	48	53	50	33	51	31	50	29	56	70
FBgn0085302	0	2934	2157	3004	3169	8081	799	3304	1720	2279	40	332	209	224	328	27	109	238	138	315
FBgn0038236	0	0	1	0	0	1	0	4	0	2	11	1	5	2	7	0	5	0	0	6
FBgn0267685	0	0	0	0	0	0	0	0	0	0	0	0	0	0	0	0	0	0	0	0
FBgn0267686	0	0	0	0	0	0	0	0	0	0	0	0	2	1	2	1	0	1	0	0
FBgn0267687	0	0	0	0	0	0	0	0	0	0	1	2	4	5	3	4	2	5	1	0
FBgn0038238	0	0	0	0	0	1	0	0	1	2	0	2	0	0	0	0	2	1	0	0
FBgn0038239	4	18	247	180	387	181	264	137	166	106	115	93	250	322	441	60	236	229	225	389
FBgn0038240	3	2202	2684	2757	3133	6280	985	2334	1810	1629	28	87	54	46	44	4	11	28	10	30
FBgn0038241	1	14	22	48	180	50	44	32	119	60	550	90	212	323	286	74	23	41	81	39
FBgn0038242	2	77	116	135	291	530	161	202	372	269	416	53	250	213	407	91	117	148	92	266
FBgn0051313	401	1511	1016	3464	2569	2951	2296	2665	4500	4134	5850	3682	5326	5659	5597	2359	3681	5745	2764	5034
FBgn0038243	68	41	27	76	82	109	93	72	108	83	98	96	69	126	66	62	106	52	58	46
FBgn0264904	3	5	2	9	10	6	3	11	14	11	9	5	8	9	7	2	2	2	5	6
FBgn0004629	999	2093	879	2865	2411	3427	3343	2112	3982	4106	2806	3737	3030	5121	3159	1021	3707	3431	2304	1777
FBgn0038244	413	255	336	392	409	385	381	462	743	526	275	393	508	464	321	451	332	234	249	383
FBgn0264903	2	6	5	9	11	14	19	7	11	7	7	7	5	5	17	5	9	28	20	25
FBgn0020299	64	13	9	29	15	19	18	13	31	26	8	36	18	11	11	15	21	4	18	21
FBgn0267865	0	0	0	0	0	3	0	0	0	0	1	0	0	0	0	0	0	0	0	0
FBgn0038246	5	5	0	3	1	10	6	4	9	4	1	4	5	0	8	3	15	1	2	8
FBgn0003169	224	188	209	254	295	307	273	273	401	290	180	269	250	252	202	202	230	158	166	212
FBgn0013981	869	851	458	973	950	1201	1191	768	1443	943	760	1312	1247	1255	838	941	1285	557	701	707
FBgn0038248	116	60	63	212	107	144	53	116	389	194	591	811	1353	1416	577	1002	589	180	149	331
FBgn0038247	4	0	0	2	2	1	0	0	3	2	1	4	2	0	2	2	5	1	0	1
FBgn0086686	254	150	145	221	216	263	169	242	417	326	220	316	366	312	178	272	220	108	126	248
FBgn0038250	573	587	624	1027	910	876	1104	891	1294	1231	1273	1224	941	1252	796	667	805	697	677	856
FBgn0038251	59	58	39	100	105	120	65	83	205	84	97	202	248	281	149	196	172	58	53	77
FBgn0025808	38	37	30	36	39	66	39	60	64	44	36	72	87	86	46	46	66	27	25	45
FBgn0038252	56	28	26	101	71	98	47	47	153	74	122	194	334	396	186	243	218	75	25	85
FBgn0265140	124	99	95	119	126	188	115	192	236	201	137	188	233	211	148	193	188	118	110	121
FBgn0262127	78	78	91	129	132	145	99	168	168	130	87	110	136	83	84	98	69	46	74	115
FBgn0038256	465	390	518	789	738	578	732	715	945	827	448	493	559	368	440	236	405	259	419	454
FBgn0011217	2617	2037	1891	2623	2364	2464	2542	2516	3929	2684	2073	3011	3144	2862	2113	2388	2313	1118	1821	2521
FBgn0263929	192	163	122	182	185	241	149	230	364	248	282	339	493	422	274	405	264	111	212	226
FBgn0038257	2120	2006	1117	1501	1711	2624	2863	1777	1763	1749	1470	1010	802	1295	701	728	818	307	1088	758
FBgn0038258	0	0	0	0	0	0	0	0	0	0	6	4	9	2	8	21	7	1	1	1
FBgn0038260	18	17	8	8	10	19	19	18	23	9	12	10	12	7	17	7	17	15	4	6
FBgn0038261	36	39	46	22	31	79	55	79	34	48	16	25	9	49	8	11	43	24	25	7
FBgn0038262	67	20	30	50	45	40	63	56	44	62	48	80	32	63	23	28	55	46	41	12
FBgn0266756	354	205	131	212	270	289	198	236	354	249	241	393	266	313	180	163	221	118	260	181
FBgn0267688	0	0	0	0	0	0	0	0	0	0	0	0	0	0	0	0	0	0	0	0
FBgn0038266	0	0	0	2	0	0	0	1	0	0	34	13	41	55	19	32	17	14	5	8
FBgn0038268	42	53	45	31	47	49	66	51	76	59	26	51	32	48	21	52	48	27	50	51
FBgn0038269	155	99	175	215	203	173	154	221	373	228	203	300	491	464	276	417	311	122	148	199
FBgn0067629	88	64	62	74	86	71	120	76	113	75	51	93	100	84	83	63	73	45	61	57
FBgn0067628	65	54	69	95	90	69	78	114	122	102	75	80	74	83	51	55	63	43	45	56
FBgn0004597	87	70	42	95	85	105	92	70	110	77	69	108	103	132	46	97	104	63	64	76
FBgn0038271	6213	4283	5144	6047	7278	5880	7708	6720	7332	6233	4059	5636	6496	5128	4600	3671	4949	3443	5060	5390
FBgn0038272	163	144	152	190	225	244	229	212	270	209	148	232	208	235	152	177	223	131	147	192
FBgn0038273	16	14	19	13	11	5	14	14	18	4	2	16	18	6	6	10	17	8	12	6
FBgn0038274	168	133	117	189	188	171	197	173	239	148	115	226	267	306	193	206	173	126	100	163
FBgn0038275	185	111	160	140	230	144	209	197	207	154	69	152	163	176	151	121	146	134	100	136
FBgn0262514	1	0	0	3	1	0	1	0	2	1	13	8	26	22	15	13	11	2	2	2
FBgn0038277	483	316	202	384	494	605	445	360	809	349	328	561	903	1149	478	488	483	240	81	293
FBgn0028662	1576	920	772	1073	1242	1583	1552	1320	1532	1552	1202	1638	939	1923	804	806	2097	1011	2169	756
FBgn0267918	0	0	0	0	0	0	0	0	0	0	0	0	0	0	0	0	0	0	0	0
FBgn0038279	7	10	1	8	13	15	2	3	16	7	5	20	10	9	13	6	7	2	1	4
FBgn0267158	0	0	0	0	0	0	0	0	0	0	0	1	0	0	1	1	1	0	0	0
FBgn0267159	0	0	0	0	1	0	0	0	0	0	3	1	3	6	4	4	3	0	2	1
FBgn0038280	0	4	0	10	3	2	1	4	11	4	38	85	116	113	93	85	83	21	13	28
FBgn0038281	0	0	0	3	0	0	0	0	3	1	30	36	53	70	40	49	41	13	7	9
FBgn0266249	0	0	0	0	0	0	0	0	0	0	0	0	1	1	0	1	0	0	0	0
FBgn0038282	23	29	10	13	14	25	18	7	20	15	1	27	29	2	6	4	32	4	0	14
FBgn0038285	0	0	0	3	1	3	1	1	1	0	5	1	4	5	0	2	0	0	0	1
FBgn0038286	239	261	201	376	334	300	248	344	536	431	277	316	282	319	209	226	201	147	219	322
FBgn0261859	96	59	63	55	67	76	26	75	123	73	45	93	83	50	35	66	34	16	35	61
FBgn0262315	0	0	0	0	0	0	0	0	0	0	0	0	0	0	0	0	0	0	0	0
FBgn0038290	2285	2246	2675	3303	3413	3011	3281	3532	3488	2816	1174	1768	2082	1112	1694	1166	1440	1268	1749	2190
FBgn0267160	22	16	16	17	11	33	16	11	26	16	18	34	7	17	12	19	33	9	19	19
FBgn0038291	3981	3631	4185	5625	5705	4702	5430	6277	6617	5986	3543	4314	5472	2852	4069	2845	3708	2340	4762	5659
FBgn0038292	240	98	97	29	83	320	280	134	291	159	231	249	23	429	13	30	423	7	329	130
FBgn0266064	1509	915	1425	1830	1815	1217	1568	2021	2034	1488	639	1202	1092	516	788	1466	849	557	1141	1205
FBgn0038295	6	1	0	4	12	3	1	0	6	3	0	10	1	1	1	4	2	1	0	2
FBgn0038294	553	117	68	33	77	391	238	135	372	243	57	2841	19	91	28	16	278	22	378	47
FBgn0038296	75	57	22	82	64	107	46	70	222	105	178	252	412	364	233	306	208	52	33	124
FBgn0263633	0	0	0	0	0	0	0	0	0	0	0	0	0	0	0	0	0	0	0	0
FBgn0260659	225	173	161	232	224	255	307	210	385	307	189	249	235	196	181	119	302	151	208	169
FBgn0028984	75	85	34	64	116	195	93	91	95	102	51	125	57	48	46	57	77	23	95	59
FBgn0038299	699	584	707	1226	995	778	996	1018	1423	1255	878	1050	1354	896	1012	635	870	658	1017	1352
FBgn0038300	57	55	63	65	81	72	66	70	98	75	47	66	70	53	49	48	60	35	48	59
FBgn0038301	103	71	102	106	109	112	108	98	130	107	61	102	83	101	60	70	81	49	58	71
FBgn0038302	116	94	102	135	154	132	141	161	154	128	75	103	91	117	96	132	153	112	149	111
FBgn0038303	100	90	72	87	109	160	130	134	216	137	73	178	171	171	111	141	114	36	53	101
FBgn0038304	179	118	120	163	201	183	163	181	307	210	182	250	333	331	158	222	258	99	122	177
FBgn0283562	0	0	0	0	0	0	0	0	0	0	0	0	0	0	0	0	0	0	0	0
FBgn0051155	80	79	89	136	159	170	163	122	201	140	116	175	172	223	144	97	154	104	78	104
FBgn0051344	100	47	23	39	33	71	83	20	46	38	44	84	64	73	56	50	79	33	31	43
FBgn0263979	440	331	356	478	558	574	395	512	692	442	256	518	550	486	454	366	498	188	291	423
FBgn0038306	277	240	297	361	317	322	325	338	478	314	141	278	298	289	188	264	278	191	157	258
FBgn0038307	243	198	290	334	346	288	382	304	353	324	168	326	337	347	247	158	285	202	186	223
FBgn0085345	79	56	9	4	9	17	8	7	81	165	80	126	17	25	6	4	9	14	8	8
FBgn0263448	0	0	0	5	0	0	1	3	0	1	1	1	9	1	0	0	3	3	0	1
FBgn0045035	104	103	174	267	173	174	112	228	437	257	121	255	207	215	139	236	187	110	218	245
FBgn0266599	12816	10728	15772	18424	18029	15124	12926	16530	31571	24512	8588	14729	15046	11922	8191	14690	10778	7047	12809	14555
FBgn0038309	0	0	0	0	0	0	0	1	0	0	0	3	2	3	0	1	1	0	0	1
FBgn0259823	48	34	6	25	30	43	27	24	48	35	14	46	38	39	16	29	33	3	5	16
FBgn0263740	1267	1055	1275	1330	1440	1346	1412	1598	1864	1520	709	1092	1247	949	930	963	952	593	840	1286
FBgn0263755	44	41	43	43	50	51	45	44	77	67	19	49	53	57	55	58	60	33	35	35
FBgn0014879	479	378	474	550	621	567	564	510	781	510	297	519	538	485	447	300	504	299	340	515
FBgn0016691	3571	2752	2773	3574	3917	3588	5099	3656	4241	3461	2638	3711	3969	3644	3257	1724	3095	2971	2643	3037
FBgn0038311	4	1	3	7	3	3	2	3	7	4	18	25	47	63	33	36	30	13	8	15
FBgn0038312	108	59	85	98	97	107	150	117	134	104	78	98	75	65	96	49	80	74	78	75
FBgn0000283	437	360	424	505	515	605	443	527	836	583	348	495	643	560	434	493	404	246	354	548
FBgn0038313	134	69	112	168	130	144	166	145	194	140	101	152	218	274	182	146	182	139	105	144
FBgn0267750	0	0	0	0	0	0	0	0	0	0	0	0	0	1	1	2	1	0	0	3
FBgn0027378	151	90	110	126	161	136	133	121	256	155	112	164	174	153	147	143	154	85	84	121
FBgn0011476	54	71	49	103	80	102	116	66	77	76	75	118	125	160	98	73	121	71	70	59
FBgn0003721	1892	997	984	1162	1339	1833	1644	1489	2416	1949	1124	4448	803	1169	688	872	1692	633	1624	1132
FBgn0266745	3	1	0	6	1	1	2	2	1	3	3	3	3	1	1	0	2	1	0	2
FBgn0004117	736	186	113	54	146	577	378	188	522	353	128	3246	38	188	29	35	414	21	621	94
FBgn0038315	51	4	3	0	0	26	26	3	0	0	0	1	0	0	0	1	0	0	2	0
FBgn0038316	94	58	59	85	107	90	98	85	157	116	95	115	150	164	114	137	116	72	58	87
FBgn0264832	184	378	93	560	289	212	859	260	495	643	1101	464	1276	1061	1806	777	911	1462	703	1188
FBgn0026441	115	85	109	130	131	166	79	157	255	192	123	216	275	311	174	266	152	64	107	166
FBgn0038318	163	147	118	162	206	243	196	165	264	192	95	152	184	155	129	130	196	112	124	154
FBgn0000533	13	8	2	8	6	21	13	3	16	13	3	29	5	10	8	6	17	4	30	0
FBgn0038319	391	251	328	357	425	362	543	347	410	336	202	370	380	394	324	177	329	239	204	271
FBgn0013269	1105	927	1552	1364	1768	1341	1363	1547	1659	1224	400	954	1134	974	850	658	925	701	689	1071
FBgn0038320	371	269	245	326	380	419	261	357	596	430	213	428	438	347	264	339	315	159	224	294
FBgn0038321	100	56	32	51	34	63	55	26	97	42	59	100	82	127	54	74	141	22	17	52
FBgn0021750	146	78	124	111	166	148	120	172	203	147	76	117	158	139	96	104	108	77	90	117
FBgn0019925	1596	1481	1614	2556	2442	1984	2386	2268	3111	2610	1679	1720	1974	1445	1804	981	1752	1040	1955	2418
FBgn0051301	271	253	222	313	310	376	372	325	433	292	163	305	397	422	280	276	346	286	167	304
FBgn0261679	0	0	0	0	0	0	0	0	0	0	0	0	0	0	0	0	0	0	0	0
FBgn0261680	0	0	0	0	0	0	0	0	0	0	0	0	0	0	0	0	0	0	0	0
FBgn0266722	41	33	23	48	40	57	48	37	41	40	39	45	63	68	39	28	49	18	24	20
FBgn0038324	18	14	16	15	33	22	16	25	27	25	14	21	34	16	27	22	32	7	22	26
FBgn0038325	98	85	48	141	124	114	129	108	180	151	129	133	209	168	177	87	148	81	111	144
FBgn0038326	809	560	704	1209	1110	925	1150	1113	1405	1311	1384	1382	1605	1074	1458	614	915	541	938	1067
FBgn0026634	150	123	112	179	205	191	205	169	276	210	170	239	266	297	172	188	195	121	115	170
FBgn0038327	150	107	101	162	109	150	145	121	232	159	124	211	238	260	156	172	201	113	109	104
FBgn0026737	85	67	84	98	87	137	107	83	155	90	88	154	204	219	114	182	157	116	73	82
FBgn0085433	56	62	40	114	99	72	72	82	117	99	148	108	112	101	70	86	86	44	57	76
FBgn0038330	47	38	14	61	63	83	46	43	118	67	79	120	154	248	88	117	115	49	31	75
FBgn0038332	22	37	16	68	42	43	52	23	51	33	72	75	79	139	77	59	66	46	21	54
FBgn0038331	338	440	358	980	889	616	830	839	1422	1181	1185	1295	1181	1163	886	523	723	627	387	717
FBgn0262483	41	60	22	50	50	66	20	25	90	45	7	47	29	11	18	24	77	7	2	45
FBgn0038334	6	8	2	17	6	14	2	5	35	7	39	96	147	205	88	129	88	37	20	31
FBgn0038337	490	336	221	546	606	522	662	627	986	928	214	372	400	223	413	363	657	309	540	106
FBgn0267725	1	2	1	1	1	0	0	3	2	1	4	0	1	1	2	0	2	2	4	0
FBgn0041188	414	237	247	352	385	403	292	449	728	445	283	502	613	502	344	439	358	181	190	320
FBgn0267571	1	2	0	0	1	0	0	0	0	0	0	0	0	0	1	1	1	0	0	0
FBgn0262367	0	0	0	0	0	0	0	0	0	0	0	0	0	0	0	0	0	0	0	0
FBgn0262429	0	0	0	0	0	0	0	0	0	0	0	0	0	0	0	0	0	0	0	0
FBgn0262397	0	0	0	0	0	0	0	0	0	0	0	0	0	0	0	0	0	0	0	0
FBgn0038339	64	20	0	1	1	1	12	0	0	0	3	6	1	1	1	0	2	1	6	6
FBgn0000047	0	0	0	0	0	0	0	0	0	0	0	0	0	0	0	2	0	0	0	0
FBgn0286071	407	293	451	409	454	451	361	560	519	460	245	280	289	117	184	131	180	124	278	348
FBgn0286736	0	0	0	0	1	0	0	0	0	0	0	0	0	0	0	0	0	0	0	0
FBgn0038342	55	29	17	66	60	74	41	43	136	72	119	181	297	439	173	192	172	97	28	73
FBgn0019940	2	0	0	2	1	1	0	3	4	0	0	13	2	4	1	1	3	0	1	0
FBgn0038343	1	6	0	2	4	7	0	0	1	0	1	6	4	3	3	1	6	0	0	3
FBgn0038344	230	149	287	209	260	208	169	347	439	260	185	246	280	202	189	392	210	100	227	258
FBgn0038345	52	24	24	54	40	57	33	35	119	50	99	166	258	317	120	194	136	64	33	41
FBgn0264776	423	327	302	576	539	541	743	579	734	483	405	620	589	493	413	251	729	348	403	469
FBgn0264775	35	2	1	0	7	46	8	3	2	7	18	39	1	101	0	3	98	1	55	0
FBgn0051296	2	1	5	1	0	7	4	0	2	2	0	1	0	3	0	11	6	10	1	0
FBgn0267408	1088	1482	2167	953	1461	2215	1524	1609	2010	1663	1239	848	533	1110	393	2748	1760	1192	1957	753
FBgn0038348	1	2	0	2	2	0	2	2	3	5	2	64	4	7	2	3	5	1	0	0
FBgn0038349	463	242	326	382	567	399	382	577	535	408	316	548	490	682	339	310	333	179	291	255
FBgn0038350	1	0	0	2	0	3	1	0	2	0	0	4	0	3	2	8	3	0	4	0
FBgn0263040	0	0	0	0	0	0	0	0	0	0	0	0	0	0	0	0	0	0	0	0
FBgn0263041	0	0	0	0	0	0	0	0	0	0	0	0	0	0	0	1	0	0	1	0
FBgn0053207	14	14	5	16	19	22	10	8	21	10	6	18	11	13	12	11	11	12	3	16
FBgn0264431	0	0	0	0	0	0	0	0	0	2	2	0	5	5	2	4	0	0	0	0
FBgn0051446	50	2	0	0	0	0	1	0	1	1	0	110	0	0	0	0	0	0	0	0
FBgn0038353	527	141	15	154	190	194	125	117	94	607	122	773	303	205	89	92	742	5	541	14
FBgn0267195	0	0	0	0	0	0	0	0	0	1	0	0	0	0	0	0	0	0	0	0
FBgn0267196	0	0	0	0	0	0	0	0	0	0	0	0	0	0	0	1	0	0	0	0
FBgn0038354	13	8	4	13	10	10	12	4	6	9	13	12	16	7	2	4	19	1	17	1
FBgn0051294	0	0	0	0	1	0	0	0	0	0	36	18	73	55	41	57	27	12	2	10
FBgn0085303	0	0	0	4	0	3	0	0	0	0	26	24	67	54	44	21	18	7	1	7
FBgn0038355	1	0	0	0	1	1	0	0	2	0	58	72	126	135	66	78	66	19	17	30
FBgn0038356	0	0	0	0	0	0	0	0	0	0	3	1	2	2	0	4	3	0	0	1
FBgn0038357	0	0	1	0	1	2	0	1	2	0	37	35	62	74	34	60	34	12	11	6
FBgn0266733	0	0	0	0	0	1	0	0	0	0	0	0	0	0	0	0	0	0	0	0
FBgn0038358	2	0	0	0	0	1	0	0	3	0	4	12	6	15	0	2	3	1	1	0
FBgn0266734	1	4	1	0	0	48	2	1	0	1	0	1	2	0	0	0	0	0	0	0
FBgn0038359	0	0	0	15	3	2	2	1	16	12	139	166	313	305	163	259	145	46	27	48
FBgn0038360	279	244	246	321	360	383	353	379	481	384	353	409	475	457	346	255	277	154	252	332
FBgn0038361	1	4	2	2	0	6	0	0	3	0	15	7	7	10	6	14	4	3	2	2
FBgn0000246	25	23	16	31	42	41	46	25	48	35	36	61	57	68	43	42	39	18	15	22
FBgn0038363	71	64	38	94	80	114	98	73	140	89	86	172	186	206	131	147	167	134	70	85
FBgn0262527	389	291	379	307	373	394	296	422	547	475	260	328	383	331	254	575	319	224	297	327
FBgn0038365	2	4	0	0	2	4	7	1	4	2	1	9	1	4	1	4	2	1	4	5
FBgn0267551	1	1	0	5	3	4	2	7	3	2	4	4	3	5	3	5	1	2	1	4
FBgn0026616	35	32	4	35	35	59	23	15	63	26	8	42	30	13	10	39	77	22	25	39
FBgn0266738	0	0	0	0	0	1	0	1	0	0	0	0	0	0	0	0	0	0	0	0
FBgn0003227	26	14	4	14	23	25	9	12	28	9	13	28	28	30	10	14	17	5	1	7
FBgn0038366	0	0	0	0	0	0	0	1	0	0	0	57	0	1	2	0	1	0	1	0
FBgn0263023	18	6	8	28	17	29	16	23	39	29	79	104	214	264	114	117	135	50	26	32
FBgn0263022	0	1	2	15	9	5	2	11	20	4	39	52	82	126	46	66	45	16	8	24
FBgn0038369	156	123	101	159	171	166	177	122	239	185	147	213	198	266	120	152	188	117	137	150
FBgn0017567	988	628	673	877	930	820	1227	934	1100	887	665	991	975	980	756	469	867	632	677	651
FBgn0263525	0	0	0	0	0	0	0	0	0	0	0	0	0	0	0	0	0	0	0	0
FBgn0003483	84	42	37	92	77	73	43	75	140	93	60	116	171	144	74	132	104	26	26	56
FBgn0038371	16	12	5	20	18	21	31	18	30	22	4	31	18	35	12	22	29	17	13	15
FBgn0265048	1345	1007	1734	2048	1892	1373	1232	2531	2946	2444	521	1007	1203	497	767	1110	961	646	1597	1384
FBgn0038373	16	12	10	68	30	43	13	29	107	50	336	443	764	818	416	565	383	107	93	198
FBgn0038376	445	312	376	512	516	545	456	564	807	657	371	580	660	677	390	1180	713	354	629	473
FBgn0051183	6	4	4	1	10	4	9	4	8	13	10	21	6	17	11	5	16	5	7	5
FBgn0038377	2	3	4	18	4	6	4	3	17	5	64	59	136	130	54	88	77	26	10	26
FBgn0038380	0	0	2	0	1	2	1	0	2	0	4	0	0	6	0	1	0	1	2	0
FBgn0027657	2471	3267	3244	2903	3421	3585	4120	3266	4719	3566	1769	1502	2559	1620	1905	18546	6909	7618	7629	5660
FBgn0051292	0	0	0	0	0	0	0	0	0	0	1	0	0	0	0	0	0	0	0	0
FBgn0038381	42	34	27	46	35	51	71	39	44	53	66	73	36	65	51	60	75	51	49	24
FBgn0266566	0	0	0	0	0	1	0	0	0	0	1	1	2	1	2	1	0	2	2	0
FBgn0038385	3	4	0	3	2	2	0	2	3	3	0	17	2	1	0	2	5	0	3	3
FBgn0267692	0	0	0	0	0	0	0	0	0	0	0	1	0	0	1	0	1	0	0	0
FBgn0085305	23	36	1	2	2	0	28	0	3	7	38	8	18	20	23	4	4	11	16	3
FBgn0038386	0	0	0	0	0	0	0	0	0	0	0	0	0	0	0	0	1	0	0	0
FBgn0038387	178	127	210	267	263	217	290	204	356	271	151	274	314	322	238	201	259	284	179	205
FBgn0013334	369	380	180	356	374	510	309	370	710	401	222	486	502	373	311	352	574	132	182	389
FBgn0051088	0	0	0	0	0	0	0	0	0	0	0	0	0	0	0	0	0	0	0	0
FBgn0286741	0	0	0	0	0	0	0	0	0	0	0	0	0	0	0	0	0	0	0	0
FBgn0038388	196	171	126	180	185	234	261	178	328	172	238	359	340	400	215	315	290	174	222	215
FBgn0038389	120	91	64	104	118	117	139	101	163	111	110	172	208	269	162	169	146	121	85	117
FBgn0052856	58	38	18	46	43	68	88	46	75	44	29	114	66	96	38	45	69	49	21	39
FBgn0038390	26	17	14	20	19	15	19	14	34	13	15	36	24	13	11	21	20	10	9	11
FBgn0002783	412	246	267	323	387	339	212	461	650	505	219	348	469	273	240	312	238	101	230	322
FBgn0022787	391	248	270	350	367	450	351	438	565	405	285	459	554	464	319	398	365	167	237	352
FBgn0003507	518	518	694	576	803	503	474	944	964	871	394	353	526	168	240	475	271	270	411	542
FBgn0264982	5	4	1	2	1	2	8	5	1	0	2	3	2	3	0	0	2	2	0	2
FBgn0262028	9	8	2	13	5	13	10	7	7	15	5	8	3	11	1	0	10	8	9	3
FBgn0038391	142	27	46	41	39	104	116	62	69	103	72	61	31	92	18	16	103	24	78	25
FBgn0003117	7	19	4	9	15	17	7	12	29	19	0	12	7	5	6	15	7	29	14	11
FBgn0038394	15	24	7	0	2	27	4	12	0	0	0	3	2	1	2	1	5	1	0	0
FBgn0038395	6	147	9	12	14	262	14	14	10	68	20	22	22	31	17	41	21	12	22	14
FBgn0024222	100	67	76	82	119	114	91	106	113	104	81	105	106	99	80	107	63	48	67	70
FBgn0266739	0	0	0	0	0	0	0	0	1	0	1	0	0	0	0	0	0	0	0	0
FBgn0038396	54	41	35	43	54	36	56	43	59	36	41	61	59	85	42	53	50	21	31	52
FBgn0027948	367	226	204	381	359	440	230	313	699	367	288	498	655	501	323	523	348	122	169	296
FBgn0038397	0	0	0	0	0	0	0	0	3	0	2	2	0	4	6	4	3	0	0	2
FBgn0026059	252	109	90	168	167	180	156	219	319	226	139	387	267	198	151	181	176	48	180	117
FBgn0052855	23	3	0	0	0	0	3	0	0	0	0	0	0	0	0	0	0	0	0	0
FBgn0038398	0	0	1	2	0	0	0	0	1	2	4	8	21	21	8	10	6	4	0	3
FBgn0010379	337	274	301	367	396	368	314	439	568	438	231	375	484	395	268	347	305	155	188	294
FBgn0003319	7	6	1	1	0	11	13	1	2	0	1	2	0	0	2	3	0	3	2	1
FBgn0038400	1724	1293	1308	1725	1824	1866	2609	1619	1986	1651	1559	1831	1886	1943	1614	1165	1941	1930	1488	1630
FBgn0038401	68	57	52	93	90	66	85	71	104	90	66	86	107	115	58	73	86	70	59	77
FBgn0038402	4	6	1	6	7	20	4	1	13	5	0	8	5	2	7	6	15	6	0	5
FBgn0063649	30	24	43	27	64	39	38	75	51	73	35	45	38	11	23	36	16	9	48	61
FBgn0263449	0	0	0	0	0	0	0	0	0	0	0	0	0	0	0	0	0	0	0	0
FBgn0038404	15	12	1	0	4	17	8	6	12	24	10	23	5	21	3	6	36	3	5	5
FBgn0038405	126	134	43	25	29	61	276	33	26	62	16	101	40	40	22	26	18	4	23	10
FBgn0024491	169	255	230	210	215	312	201	220	261	192	298	199	193	192	159	152	170	185	155	145
FBgn0086370	160	142	134	194	172	205	146	147	359	185	252	319	406	474	216	388	316	150	109	169
FBgn0038407	603	433	654	854	747	698	896	772	886	802	526	632	706	642	691	246	634	620	658	642
FBgn0051287	11	4	5	35	10	19	16	15	50	26	101	135	235	292	140	194	182	65	16	45
FBgn0010438	195	208	241	257	279	223	342	219	300	212	83	185	223	147	166	186	282	193	190	204
FBgn0267199	0	2	0	0	0	1	0	0	0	0	1	0	0	0	0	0	0	0	0	0
FBgn0267200	0	0	0	0	0	0	0	1	1	0	0	0	0	0	0	0	1	0	0	1
FBgn0267198	0	0	0	0	0	0	0	0	0	0	0	0	0	0	0	0	0	0	0	0
FBgn0267197	0	0	0	0	0	0	0	0	0	0	0	0	0	0	0	0	0	0	0	0
FBgn0267202	0	0	0	0	0	0	0	0	0	0	0	0	0	0	0	0	0	0	0	0
FBgn0267201	0	0	0	0	0	0	1	0	0	0	0	0	0	0	0	0	0	0	0	0
FBgn0267203	1	0	0	0	0	1	0	0	0	0	0	0	0	0	0	0	0	0	0	0
FBgn0040071	81	54	68	82	88	103	66	123	137	93	58	81	76	60	47	44	63	31	50	68
FBgn0040237	1241	1365	1836	2004	2264	1813	1832	2435	3938	2992	1106	1471	1645	1562	1132	3608	3438	3295	3761	3296
FBgn0020407	55	24	44	33	41	48	55	46	69	55	34	64	55	61	44	45	63	39	29	41
FBgn0020399	8	2	5	27	9	6	2	5	42	11	60	92	146	217	102	123	109	46	10	55
FBgn0261286	277	202	387	356	429	300	279	458	497	333	97	202	256	193	152	187	176	132	156	238
FBgn0250823	683	436	434	790	663	760	576	734	1361	896	873	1184	1390	1511	784	1107	1004	387	520	755
FBgn0038412	48	10	7	12	17	11	19	15	21	48	20	54	3	24	9	7	38	15	56	4
FBgn0040271	96	61	133	48	84	94	78	119	101	66	17	66	53	40	14	62	52	37	38	33
FBgn0011858	0	0	0	1	0	0	0	0	0	0	0	0	0	0	0	0	0	0	0	0
FBgn0012011	0	0	0	0	0	0	0	0	0	0	0	0	0	0	0	0	0	0	0	0
FBgn0264836	0	0	0	1	0	0	0	1	0	0	0	0	0	0	0	2	0	0	0	0
FBgn0038414	18	3	0	1	0	2	0	4	3	4	0	16	1	2	1	0	7	1	13	0
FBgn0038415	0	0	0	0	0	0	0	0	0	0	0	0	0	0	0	0	0	0	0	0
FBgn0038416	35	4	0	2	1	0	1	0	2	1	0	47	3	0	0	1	2	0	8	0
FBgn0283477	700	567	535	744	737	796	766	796	1100	741	529	871	1017	956	703	633	876	469	423	670
FBgn0038418	32	18	6	24	18	28	17	15	46	22	21	31	51	52	21	29	22	10	20	27
FBgn0038419	41	26	25	68	44	39	69	55	106	78	35	44	58	31	20	36	53	32	45	47
FBgn0027095	1405	1562	1204	1919	1898	1980	2436	1554	2172	1746	1709	1773	2141	2114	2197	862	1865	1168	1310	1924
FBgn0038420	141	301	302	501	518	400	427	445	626	434	347	310	435	236	419	387	427	333	389	499
FBgn0038421	35	26	19	35	36	30	28	25	34	35	42	40	50	35	31	32	42	24	15	35
FBgn0259917	0	0	0	0	0	0	0	0	0	0	10	7	20	24	11	23	17	6	3	1
FBgn0038422	5	10	5	2	21	38	2	11	17	15	5	19	12	6	5	5	6	0	3	1
FBgn0038423	0	0	0	0	0	1	0	0	1	2	24	23	58	71	34	40	36	8	5	11
FBgn0266703	0	0	0	0	0	1	0	0	3	1	9	3	8	18	4	10	3	2	3	4
FBgn0003513	0	1	0	0	0	0	0	0	8	0	0	1	6	8	2	4	0	0	0	1
FBgn0267190	0	0	0	0	0	0	0	0	0	0	3	0	2	1	1	1	1	1	0	0
FBgn0051497	0	0	0	0	0	0	0	0	0	0	0	0	0	0	0	0	0	0	0	0
FBgn0267191	1	0	0	0	0	0	0	0	0	0	0	0	0	0	0	0	0	0	0	0
FBgn0051279	6	2	7	13	5	7	9	5	21	8	35	51	90	97	44	70	51	33	9	16
FBgn0051282	0	0	0	0	0	0	0	0	0	0	0	0	0	0	0	0	0	0	0	0
FBgn0038424	216	159	155	203	224	259	223	227	329	219	177	250	349	323	190	254	241	140	179	225
FBgn0038425	57	41	51	55	85	68	74	60	61	55	42	65	67	67	57	50	76	45	45	40
FBgn0038426	267	210	205	351	360	287	518	276	321	282	146	304	315	399	261	127	282	265	180	241
FBgn0038427	257	197	165	246	214	269	231	287	451	301	193	338	417	444	206	278	313	141	202	262
FBgn0038428	264	184	253	302	287	355	323	239	436	299	247	359	441	473	306	309	320	218	205	301
FBgn0038429	160	98	167	148	199	170	195	193	217	152	66	118	149	95	104	83	86	58	78	128
FBgn0044826	255	178	152	233	283	303	279	272	524	330	270	380	371	422	195	363	338	133	273	235
FBgn0038431	6	0	1	0	2	49	2	1	1	47	2	77	5	7	1	6	133	2	3	2
FBgn0038432	78	74	34	68	86	103	102	63	95	73	46	104	69	93	54	97	109	41	85	53
FBgn0250754	332	221	146	327	355	359	177	299	716	355	291	591	742	618	368	606	355	115	176	322
FBgn0027053	245	202	224	280	304	337	319	335	427	292	204	450	511	481	287	309	413	159	182	278
FBgn0038435	2	5	0	3	2	4	0	3	3	0	0	0	4	3	4	0	8	4	0	2
FBgn0267693	1	2	1	2	1	2	2	1	1	1	0	2	2	0	3	0	7	4	0	0
FBgn0038436	4	8	2	5	15	13	4	1	15	3	2	13	4	3	7	5	12	1	0	8
FBgn0004087	127	122	85	106	151	154	208	108	156	152	63	120	131	115	134	103	148	106	96	150
FBgn0038437	53	62	51	107	73	100	118	67	107	88	67	151	178	239	110	96	150	107	71	63
FBgn0038438	307	259	226	357	393	354	407	300	420	358	349	391	418	434	304	233	303	224	305	330
FBgn0038439	11	0	0	0	0	0	0	0	0	0	0	0	0	4	0	0	0	0	0	0
FBgn0038440	0	0	1	0	0	0	0	0	0	1	0	0	0	2	0	0	0	1	0	0
FBgn0028381	132	45	60	65	75	165	156	87	118	125	148	163	64	242	63	48	200	57	145	82
FBgn0259244	71	66	34	99	76	91	59	59	137	72	28	84	92	64	50	73	93	18	15	66
FBgn0267694	0	0	0	0	0	0	0	0	0	0	1	0	1	1	0	1	0	0	0	0
FBgn0038445	9	2	4	17	10	23	6	8	37	7	69	92	127	164	76	131	102	28	12	36
FBgn0038446	78	55	59	85	82	95	116	54	92	83	63	106	115	130	82	76	101	86	45	47
FBgn0020907	2169	1698	1625	3569	3369	3182	4216	2451	3743	4901	2232	2164	2822	1463	3418	1274	2615	701	1999	859
FBgn0038447	1	0	0	0	0	2	0	0	0	0	2	0	0	0	2	0	0	0	3	0
FBgn0027562	5	3	0	2	7	10	0	1	0	1	5	14	1	6	5	0	5	3	2	0
FBgn0027109	11	10	0	6	8	16	6	0	8	3	0	6	7	1	3	4	24	6	0	6
FBgn0038448	0	0	0	0	0	0	0	0	0	0	4	3	4	7	13	11	7	0	0	5
FBgn0022344	694	443	557	644	651	544	857	586	856	554	386	621	811	747	517	376	552	387	379	516
FBgn0038449	0	1	0	2	0	0	0	0	1	0	11	9	19	18	3	11	6	0	2	3
FBgn0038450	1	0	0	0	0	3	3	0	2	0	0	0	3	0	0	1	0	0	0	0
FBgn0262233	0	0	0	0	0	0	0	0	0	0	0	0	0	0	0	0	0	0	0	0
FBgn0038451	0	1	0	3	0	6	0	0	6	0	0	0	2	0	0	0	0	0	0	0
FBgn0038452	1	0	0	2	0	3	0	3	1	3	0	9	5	12	6	2	5	3	0	1
FBgn0285925	168	147	82	186	194	210	141	117	307	186	106	319	263	99	184	144	263	61	106	212
FBgn0015520	309	185	117	324	297	397	190	277	695	354	257	631	801	729	386	559	445	139	87	211
FBgn0038453	169	166	78	232	202	279	186	131	300	196	195	415	421	573	248	346	395	188	117	168
FBgn0038454	27	21	30	39	45	37	31	35	39	51	27	51	56	59	29	33	47	20	27	35
FBgn0015019	1101	813	1028	1159	1296	1190	973	1162	2045	1331	555	1188	1347	1223	725	904	936	455	653	929
FBgn0015351	46	33	31	26	28	37	41	28	57	19	37	47	37	48	13	149	70	77	32	24
FBgn0038455	71	58	49	52	59	95	105	48	125	81	44	39	51	67	46	413	156	152	126	58
FBgn0051217	286	191	244	192	227	202	296	267	219	209	111	153	167	85	97	217	140	90	244	194
FBgn0003944	58	30	36	39	51	43	67	42	71	44	18	24	60	18	33	30	38	26	33	73
FBgn0020556	2	2	0	3	3	0	0	0	0	2	4	7	24	17	7	4	5	1	1	3
FBgn0063261	7	0	1	6	4	5	2	0	17	1	32	40	88	90	33	41	50	11	2	12
FBgn0266250	0	0	0	0	0	0	0	0	0	0	0	0	0	0	0	0	0	0	0	0
FBgn0015230	0	0	0	0	0	0	0	0	0	0	1	0	1	2	0	4	0	0	0	1
FBgn0267314	0	0	0	0	0	0	0	0	0	0	0	0	0	0	0	0	0	0	0	0
FBgn0267315	0	2	0	0	0	0	0	0	0	0	2	1	2	0	0	0	0	0	0	0
FBgn0000014	186	129	127	215	169	185	179	237	306	228	112	143	219	125	108	194	150	149	116	184
FBgn0264857	3	2	2	3	1	5	1	0	5	3	2	1	1	2	1	2	3	1	4	1
FBgn0020546	0	1	0	4	1	1	1	0	4	2	0	0	3	2	1	1	2	1	0	1
FBgn0262462	0	0	0	0	0	0	0	0	0	0	0	0	0	0	0	0	0	0	0	0
FBgn0262290	0	0	0	0	0	0	0	0	0	0	0	0	0	0	0	0	0	0	0	0
FBgn0263595	1	0	0	0	0	0	0	0	0	1	0	0	0	0	0	0	0	0	0	0
FBgn0000015	35	25	18	32	28	24	15	36	39	12	10	19	16	24	10	7	21	8	16	25
FBgn0278597	0	0	0	0	0	0	0	0	0	1	0	0	0	0	0	0	0	0	0	0
FBgn0038458	0	0	0	0	1	0	0	0	0	0	5	7	10	11	8	11	14	1	4	1
FBgn0015008	13	1	2	34	13	10	14	4	45	22	126	168	263	312	136	195	150	60	34	67
FBgn0015011	305	147	154	219	274	288	304	332	223	276	191	199	110	206	127	89	193	73	381	119
FBgn0038460	30	17	12	8	21	55	29	24	15	32	23	25	14	37	16	13	38	13	27	8
FBgn0267152	0	0	0	0	0	0	0	0	0	0	0	0	0	0	0	0	0	0	0	0
FBgn0043069	2	0	0	0	2	0	4	0	0	0	1	3	4	2	2	0	0	0	0	2
FBgn0038461	177	147	144	163	144	151	230	162	235	179	141	234	269	290	190	169	249	140	142	158
FBgn0266748	0	0	0	0	2	0	2	1	0	1	1	0	0	0	0	1	0	1	0	0
FBgn0266740	0	0	0	0	0	0	0	0	0	0	0	0	0	0	0	0	0	0	0	0
FBgn0051274	0	0	0	0	0	0	0	0	0	0	0	0	0	0	0	0	0	0	0	1
FBgn0038462	133	104	107	168	162	143	203	153	181	140	120	209	246	252	174	134	190	133	82	121
FBgn0038463	776	478	558	855	794	621	973	890	1060	883	352	501	781	542	457	704	356	167	379	504
FBgn0266917	223	192	172	254	236	253	186	223	390	260	175	314	427	293	240	281	264	110	150	211
FBgn0038465	1057	986	1215	1762	1849	1490	1756	1769	2146	1787	876	1076	1191	673	861	921	1176	567	1365	1310
FBgn0038466	130	42	71	40	78	188	184	74	79	167	108	155	13	198	10	10	182	10	81	48
[truncated: 15,808 more rows]

## Sheet: c
	Control	MPC+	PI3K+	MPC+, PI3K+
	1986.98	664.088	2756.7	556.933
	2096.39	774.801	3145.99	534.909
	2241.51	1112.16	3333.66	477.536
	2074.03	981.033	3987.12
	2058.6	617.337	3165.14
One way Annova				p values
	Control vs. MPC+			<0.0001
	Control vs. PI3K+			<0.0001
	Control vs. MPC+, PI3K+			<0.0001
	MPC+ vs. PI3K+			<0.0001
	MPC+ vs. MPC+, PI3K+			0.4346
	PI3K+ vs. MPC+, PI3K+			<0.0001

## Sheet: d
	Control	MPC+	Tsc1-KD	MPC+, Tsc1-KD
	1986.98	664.088	2974.67	884.46
	2096.39	774.801	2754.87	692.202
	2241.51	1112.16	2954.4	1013.69
	2074.03	981.033	3058.66	979.603
	2058.6	617.337	3550.02	738.736
One way Annova
	Control vs. MPC+			<0.0001
	Control vs. Tsc1-KD			<0.0001
	Control vs. MPC+, Tsc1-KD			<0.0001
	MPC+ vs. Tsc1-KD			<0.0001
	MPC+ vs. MPC+, Tsc1-KD			0.9942
	Tsc1-KD vs. MPC+, TSC1-KD			<0.0001

## Sheet: e
	Control	MPC+	Myc+	MPC+, Myc+
	1986.98	664.088	3285.6	1689.12
	2096.39	774.801	4139.92	2607.12
	2241.51	1112.16	3088.79	1441.26
	2074.03	981.033	3669.62	2000.99
	2058.6	617.337	4809.45	2479.53
				Adjusted P Value
One way Annova	Control vs. MPC+			0.0018
	Control vs. Myc+			<0.0001
	Control vs. MPC+, Myc+			0.9981
	MPC+ vs. Myc+			<0.0001
	MPC+ vs. MPC+, Myc+			0.0026
	Myc+ vs. MPC+, Myc+			<0.0001

## Sheet: f
	Control	MPC+	Myc-KD	MPC+, Myc-KD
	1986.98	664.088	1055.53	728.261
	2096.39	774.801	899.629	798.271
	2241.51	1112.16	951.184	903.966
	2074.03	981.033	1100.58
	2058.6	617.337
				Adjusted P Value
One way Annova	Control vs. MPC+			<0.0001
	Control vs. Myc-KD			<0.0001
	Control vs. MPC+, Myc-KD			<0.0001
	MPC+ vs. Myc-KD			0.3031
	MPC+ vs. MPC+, Myc-KD			0.9973
	Myc-KD vs. MPC+, Myc-KD			0.3196
