# Supplementary material for: The fate of pyruvate dictates cell growth by modulating cellular redox potential
Source: eLife. 2025 Dec 16;13:RP103705. doi: 10.7554/eLife.103705 (PMC12707817; doi:10.7554/eLife.103705)
Supplement: Figure 2—source data 1. [file elife-103705-fig2-data1.xlsx]

## Sheet: c
	S6k+	Control	MPC+
	646.085	125.884	533.256
	696.929	104.399	1380.55
	697.353	120.748	628.703
	619.655	120.982	408.432
	1142.5	95.2212	554.429
	689.412	72.1507	415.556
	997.823	87.4667	443.936
	953.602	124.059	349.846
	187.144	165.882	510.39
	799.177	88.7224	227.797
	907.623	128.323	1047.16
	1192.62	98.8688	1064.02
	850.566	112.722	1074.99
	717.204	116.636	711.919
	683.816	102.008	189.114
	948.702	120.215	107.767
	701.439	112.942	118.335
	769.378	96.6288	470.406
	650.954	118.665	642.823
	667.92	95.0701	347.21
	796.44	97.0541	584.899
	601.783
	511.849
one way ANOVA compared to control	<0.0001		<0.0001

## Sheet: e
	Rheb+	Control	MPC+
	217.961	71.5235	269.849
	345.755	101.266	281.777
	565.854	106.699	331.978
	593.32	74.9431	268.05
	414.198	90.5902	471.893
	517.519	92.0311	399.287
	498.382	69.0414	231.002
	558.585	97.2887	231.523
	436.445	134.026	391.822
	387.057	80.3557	262.774
	307.829	111.416	329.57
	250.838	94.7243	246.952
	397.821	102.552	189.893
	394.137	100.452	280.365
	511.907	98.8322	248.225
	284.875	105.455	251.891
	520.218	98.928	309.57
	507.022	137.124	362.989
	500.958	118.443	223.434
	417.636	175.72	216.995
	477.623	59.3995	326.634
	345.786	118.534	336.187
	282.422	172.815	310.45
	398.303	101.07	332.392
	346.063	110.471	334.343
		115.24	317.054
			445.234
			439.254
			310.312
			337.509
one way ANOVA compared to control	<0.0001		<0.0001

## Sheet: g
	Myc-KD	Control	MPC+
	70.7408	72.959	254.287
	56.3193	95.095	236.842
	18.1502	77.125	244.439
	40.28	68.82	263.936
	30.8761	91.633	297.17
	42.6244	97.137	262.363
	56.9248	89.613	303.845
	45.3063	108.1	172.033
	57.4612	99.702	243.059
	71.9693	63.352	344.241
	54.8486	74.002	226.139
	58.7502	79.995	295.642
	20.1227	88.508	292.67
		78.718	230.184
		99.838	359.736
			256.479
			196.084
one way ANOVA compared to control	0.0098		<0.0001

## Sheet: i
	starved	Control	MPC+
	139.177	99.4211	112.59
	136.655	104.879	108.084
	143.56	111.639	106.76
	142.402	101.034	103.37
	148.439	91.3376	93.0742
	136.035	100.041	95.1209
	144.201	99.7726	100.62
	121.087	106.016	100.62
	117.159	95.6791	96.134
	114.658	100.062	95.0176
	120.529	105.024	94.5834
	114.348	98.098	100.93
	133.182	105.189	101.551
	117.056	109.035	93.3843
	114.699	94.8108	88.8774
	118.834	97.1056	95.5964
	129.026	95.1209	95.5964
	118.338	89.4976	94.4594
	112.963	98.8629	113.417
	131.342	97.4364	111.867
one way ANOVA compared to control	<0.0001		0.9995
