# Supplementary material for: The fate of pyruvate dictates cell growth by modulating cellular redox potential
Source: eLife. 2025 Dec 16;13:RP103705. doi: 10.7554/eLife.103705 (PMC12707817; doi:10.7554/eLife.103705)
Supplement: Figure 3—figure supplement 1—source data 1. [file elife-103705-fig3-figsupp1-data1.xlsx]

## Sheet: a
	EV	MPC+
	16577.6	12771.7
	9986.86	3109.62
	9415.2	5441.96
	9271.51	4745.84
	10380.1	3649.88
	10127.9	4459.79
	9398.87	5098.14
	11894.8	4380.3
	10980.7	4529.8
	22623.2	4202.25
	11832.1	4469.43
	16977.6	3083.03
	5094.11	3954.13
	8824.43	2502.16
	5167.33	7530.2
	6081.96	16472.4
	3658.23	18877.1
	8547.72	6345.75
	15293.3	2868.73
	25510.9	6137.73
	27620.2	9380.44
	30943.4	3895.09
		10685.4
		18225.6
		3336.91
		17957.4
	ttest	0.0044

## Sheet: b
	EV-DOX	EV+DOX	MPC+ -DOX	MPC+ +DOX
	2.544	2.576	2.52	2.75
	2.752	2.464	2.7	2.82
	2.5056	2.064	2.42	2.688
	Tukey's multiple comparisons test	Adjusted P Value
	EV-DOX vs. EV+DOX	0.3907
	EV-DOX vs. MPC+ -DOX	0.9785
	EV-DOX vs. MPC+ +DOX	0.6988
	EV+DOX vs. MPC+ -DOX	0.5915
	EV+DOX vs. MPC+ +DOX	0.0902
	MPC+ -DOX vs. MPC+ +DOX	0.4847

## Sheet: c
		DOX-			DOX+			p values
	G0/G1	68.2	64.2	67.8	66.9	67.5	70	0.6163
	S	12.3	13.4	11.8	13.5	12.8	10	0.9841
	G2/M	15.9	18.4	17.7	16	15.8	16.3	0.6677

## Sheet: d
			DOX -						DOX +
		live	85.7	84.8	87	86.6	82.3	90.8	88.5	88.6	82.7	92.1	83.3	83.3
		apoptotic	1.9	1.3	1	1.5	1	0.9	2.8	1	0.7	1	0.6	1.1
		Necrotic	1.5	0.8	1.2	1.1	3.8	0.3	1.3	0.3	0.7	0.5	0.5	0.5

## Sheet: e-h
		SF4. e- DNA		SF4. e- RNA		SF4. e- TAGs		SF4. e- Protein
		EV	MPC+	EV	MPC+	EV	MPC+	EV	MPC+
		53.25	63.5	32	33.2	11.5021	7.54844	13.6329	10.7094
		77.5	53.5	32.9	28	7.49008	8.83812	14.4249	11.4118
		81.375	64.25	38	36	12.3599	11.0177	14.2872	12.5482
								14.115	11.5565
	ttest		0.7		0.5622		0.5128		0.0037
