# Supplementary material for: The fate of pyruvate dictates cell growth by modulating cellular redox potential
Source: eLife. 2025 Dec 16;13:RP103705. doi: 10.7554/eLife.103705 (PMC12707817; doi:10.7554/eLife.103705)
Supplement: Figure 3—source data 1. [file elife-103705-fig3-data1.xlsx]

## Sheet: b
	MPC+								EV
	0	2	4	6	8	10	12	24	24
	645.788	609.957	702.799	456.899	478.941	457.682	436.008	425.504	819.686
	645.341	654.728	468.461	437.03	441.648	403.424	345.739	442.254	666.459
	729.178	656.657	456.816	395.269	447.202	365.822	465.764	420.17	822.708
	722.954	662.437	715.318	441.766	555.616	382.238	397.586	441.785	527.476
	629.47	538.158	495.581	482.252	481.19	434.795	364.032	585.783	614.029
one way ANOVA		p-Value
	0 H vs. 2 H	0.9764
	0 H vs. 4 H	0.3943
	0 H vs. 6 H	0.0006
	0 H vs. 8 H	0.0064
	0 H vs. 10 H	<0.0001
	0 H vs. 12 H	<0.0001
	0 H vs. 24 H	0.0022
	0 H vs. EV 24 H	>0.9999
	24 H vs. EV 24 H	0.0008

## Sheet: c
	EV	MPC+	UK5099	MPC+, UK5099
	819.686	425.504	1175.05	956.15
	666.459	442.254	1148.02	937.235
	822.708	420.17	966.643	668.726
	527.476	422.734	1055.55	605.886
	614.029	474.593	1209.9
One way Annova	Tukey's multiple comparisons test	Adjusted P Value
	EV vs. MPC+	0.0181
	EV vs. UK5099	0.0002
	EV vs. MPC+, UK5099	0.5793
	MPC+ vs. UK5099	<0.0001
	MPC+ vs. MPC+, UK5099	0.0021
	UK5099 vs. MPC+, UK5099	0.0051

## Sheet: e
	EV-DOX	EV+DOX	MPC-OE -DOX	MPC-OE +DOX
	648186	653959	736908	529684
	706886	690690	657560	551207
	664765	600125	799583	550185
	623128	685872	712693	498598
	640800	637131	641380	567795
	676504	629236	694395	489455
	663208	653636	705085	522593
	768480	596916	694378	543628
	655741	711262	709433	502471
	758072	689184	763518	527739
	689983	725063	641484	533875
	679572	631792	603369	511742
	676129	629514	709804	482767
	602149	765556	676333	476288
	701918	698551	650621	565648
	617563	722599	665768	514141
	667126	626626	697759	454365
	665580	698283	616699	489241
	560366	700382	725950	515031
	645657	647159	717495	494932
	698708	647159	673962	531376
	748961	712276	738420	536596
	646770	704428	637884	526010
	791846	740752	686884	525198
	691003	643938	717712	486627
			691003
One way Annova
	Tukey's multiple comparisons test	Adjusted P Value
	EV -DOX vs. EV +DOX	>0.9999
	EV -DOX vs. MPC+ -DOX	0.5831
	EV +DOX vs. MPC+ -DOX	0.5832
	EV +DOX vs. MPC+ +DOX	<0.0001
	MPC+ -DOX vs. MPC+ +DOX	<0.0001

## Sheet: g
	DOX-	DOX+
	102542	96820
	102177	95676
	102151	95810
	Unpaired t test	<0.0001

## Sheet: h
			EV				MPC+				P value
	DNA		1.03	0.8982	1.0645		0.8257	0.9205	0.941		0.183391
	TAGs		1.1059	0.92	1.0884	1	0.7258	0.8498	1.0593	1.14	0.459435
	RNA		0.853	1.096	1.1508		0.8981	1.1567	0.9084		0.733363
	Protein		1.14	0.98	1.01		0.66	0.76	0.733		0.00836

## Sheet: j
	EV	MPC+
	102.298	27.2064
	88.7967	42.1963
	72.4804	29.8514
	82.932	18.6047
	70.7523	18.2916
	73.1049	18.7946
	114.073	29.4749
	149.024	29.3895
	87.4719	32.5159
	98.8589	22.973
	102.727	46.731
	149.628	71.1099
	161.451	82.2332
	122.294	20.9301
	156.178	64.6071
	111.929	96.1052
	59.162	94.1653
	78.7692	39.0022
	138.077	49.7135
	129.629	74.0332
	146.63	42.0571
	117.799	50.8015
	60.8367	51.165
	58.227	48.4596
	62.7035	37.5356
	77.453	23.2279
	93.5274	10.6458
	75.183	44.2383
	81.2338	44.6915
	76.7685	25.8018
		27.6404
		26.6047
		33.6562
	Unpaired t test	<0.0001

## Sheet: l
	EV	MPC+
	1.08053	0.564798
	0.99644	0.684484
	0.923034	0.578184
	ttest	0.0031

## Sheet: m
			EV			MPC+			Adjusted P Value
	DOX-		0.941508	1.04651	1.01198	1.05172	0.937931	1.04483	0.9996
	DOX+		0.847075	1.12896	1.26145	0.613793	0.672414	0.644828	0.014
	UK5099		0.96124	1.29316	1.04228	1.41379	0.953448	1.32586	0.6771
