# Supplementary material for: The fate of pyruvate dictates cell growth by modulating cellular redox potential
Source: eLife. 2025 Dec 16;13:RP103705. doi: 10.7554/eLife.103705 (PMC12707817; doi:10.7554/eLife.103705)
Supplement: Figure 4—figure supplement 1—source data 1. [file elife-103705-fig4-figsupp1-data1.xlsx]

## Sheet: a
3-phosphoglyceric acid M+3	EV				MPC+				p value			EV				MPC+					p value
0		0	0	0	0	0	0	0	>0.9999				6052	9955	9055	12326	11953	11009	10781		0.9323
1		0.48584	0.434738	0.416677		0.4556	0.437227	0.406642	0.9959				23307	25854	22607	22013	27814	29838	19519		0.9995
2	0.519319		0.369576	0.579552	0.3232	0.35626	0.37806	0.40277	0.0098			29244	6798	11976	13996	16713	16007	24819	35391		0.2729
4	0.469295	0.459037	0.457339	0.366223	0.358702	0.385747	0.309251	0.281043	0.0207			26415	26379	27794	16134	24232	18586	18311	16416	24516	0.4332

## Sheet: b
Pyruvate m+3	EV				MPC+				p value		Pyruvate m+3	EV				MPC+				p value
0	0	0	0	0	0	0	0	0	>0.9999		0	30070	35008		31399	36932	34012	38240		0.9993
1	0.317967	0.25501	0.299204	0.322397	0.223435	0.337169	0.375211	0.299032	0.9896		1	76538	49381	90877		109979	150584	123081		0.0571
2	0.441797	0.44058	0.421297	0.461756	0.261625	0.353386	0.349409	0.319742	0.0002		2		182227	165251	201461	253244	173726	234047		0.2975
4	0.342551	0.422217	0.408699	0.357289	0.323963	0.354908	0.303508	0.353588	0.2027		4	128551	118899		141896	231422	216445	149911		0.0139

## Sheet: c
Alanine M+3	EV				MPC+				adjusted p value		Alanine M+3	EV				MPC+				adjusted p value
0	0	0	0	0	0	0	0	0	>0.9999		0	40632	44247	42553	37986	39625	38461	31992		0.9965
1	0.28879	0.289011	0.26518		0.225001	0.31951	0.235394		0.6968		1		74210	63657	72403	57931	43920		59487	0.7816
2	0.262679	0.263045	0.293412		0.266187	0.24716	0.234054	0.216024	0.2546		2	91518	81910	62456	78572	87924	69796	81317	72276	>0.9999
4	0.335982	0.402093	0.355376	0.369101	0.32583	0.30754	0.322278	0.308849	0.0187		4	305331	301221	248081	217936	173588	206352	233824	203332	0.0002

## Sheet: d
Succinate M+2	EV				MPC+				adjusted p value
0	46287	65921	54805	46553	52246	80176	69805	40624	0.9859
1	70796		123971	100838	168354		136586	110387	0.1695
2		97013	59060	84416	120647	118952	163431	135826	0.0219
4		207410	275038	275280	281740		275750	251499	0.843

## Sheet: e
Succinate M+3	EV				MPC+				adjusted p value
0	4699		9302	7805	11352	18955	32968	16304	0.754036
1	8054	22442	27658	21276	32138	11919	43180	33601	0.754036
2	19280	21691	9739	23190	102420	105065	98771		0.23601
4	60759	72325		70588	173588	206352	233824	203332	0.003226

## Sheet: f
fumarate m2	EV				MPC+				p value		fumarate m2	EV				MPC+				p value
0	0	0	0	0	0	0	0	0	>0.9999		0	32972	36178	46990	54660	64691	52342	63945		0.5846
1	0.06023		0.0575884	0.0507235	0.05636	0.073302	0.064066		0.2197		1		102490	145262	125022		203959	155032	213216	0.0006
2	0.068272	0.062961	0.0540305		0.068333	0.062749	0.065518		0.8527		2		154412	127845	120750	136682	175344	177588		0.2014
4	0.070422	0.079738	0.0774161	0.0805112	0.082674	0.088453	0.078325	0.071237	0.8688		4	230376	226599	231368	206086	199414	215758	197949	215659	0.5795

## Sheet: g
Malate M+2	EV					MPC+					p value		Malate M+2	EV					MPC+					p value
0	0	0	0	0		0	0	0	0		>0.9999		0	60302	63303	63253			57526	61828		85285		>0.9999
1	0.0793881	0.0760996	0.052512	0.0469425		0.134291	0.0667699	0.11154	0.0956583		0.0443		1	169159	148165	131774			186109		157903	172212		0.0443
2	0.133254	0.119331	0.094491	0.101211		0.135513	0.154126	0.11151	0.112903		0.6878		2	177161	148376	145935			196000	198447	180346			0.6878
4	0.138692	0.136447	0.15286	0.160145	0.190453	0.127094	0.171253	0.19308	0.141791	0.137185	0.9999		4	210286	230139	242687			247752		289838	218327		0.9999

## Sheet: h
fumarate m+3	EV					MPC+					p value		fumarate m+3	EV					MPC+					p value
0	0	0	0	0		0	0	0	0				0		17992	17824	24628		20889	20683	27943	27109
1	0.01611	0.015603		0.014236		0.02449	0.029889	0.025182			0.006659		1	30706		54282	47328		39454		58103	71096		0.006659
2	0.032847	0.031964	0.0230255	0.024447		0.029883	0.027112	0.031146	0.029708		0.417576		2		57759	41203	37565		53737	67254	67447			0.417576
4	0.033171	0.038696	0.0379412	0.038883	0.0302458		0.041926	0.049299	0.043222		0.019501		4		108877	96989	108036		113495	147400	104597			0.019501

## Sheet: i
Malate m+3	EV				MPC+					p value		Malate m+3	EV					MPC+					p value
0	0	0	0	0	0	0	0	0		>0.9999		0	20395	20043	26170	25548		20258	23540	39851	35056		>0.9999
1	0.0247077	0.0207129	0.042243	0.0464018	0.02531	0.0515853	0.01663	0.0386458		>0.9999		1		56717	66223	63371		64237	102847	48094	70846		>0.9999
2	0.0493678	0.0353994	0.047781	0.0452395	0.0405682		0.03913	0.0414948		0.9539		2		67246	68099	63658		78768		75106	88864		0.9539
4	0.0936208	0.100176	0.103243		0.0659361	0.0882181	0.08199	0.0734268	0.0766232	0.0072		4	118077	137929		134138		130650	167353	154061			0.0072
