# Supplementary material for: The fate of pyruvate dictates cell growth by modulating cellular redox potential
Source: eLife. 2025 Dec 16;13:RP103705. doi: 10.7554/eLife.103705 (PMC12707817; doi:10.7554/eLife.103705)
Supplement: Figure 4—figure supplement 2—source data 1. [file elife-103705-fig4-figsupp2-data1.xlsx]

## Sheet: a
Control	MPC+	Pcb-KD	MPC+, Pcb-KD	Pcb+	MPC+, Pcb+
0.990801	22.3417	1.58301	18.6616	1.39056	25.882
0.904797	63.8966	1.82724	13.6075	1.1677	28.2368
1.11548	49.4421	1.39603	48.0789	1.52379	36.395

## Sheet: b
Control	MPC+	Pcb-KD	MPC+, Pcb-KD	Pcb+	MPC+, Pcb+
0.99447	47.9474	0.695923	22.4555	1.05971	48.0789
0.971981	53.3612	0.830854	68.4036	1.60919	36.395
1.03455	55.1358	0.597496	91.013	0.865937	20.8986

## Sheet: c
Control	MPC+	Pcb-KD	MPC+, Pcb-KD	Pcb+	MPC+, Pcb+
0.849469	1.0391	0.182167	0.197373	21.431	23.1777
1.00797	0.638164	0.200592	0.252438	23.165	22.4555
1.17718	0.843816	0.278935	0.238986	21.608	14.8323

## Sheet: d
	Control	MPC+	Pcb-KO	MPC+,Pcb-KO
	2465.5	664.088	2258.04	1201.02
	2611.77	774.801	2380.3	2274.8
	2631.49	1112.16	2379.5	2383.49
	2776.48	981.033	2089.17	1822.54
	2593.37	617.337		2077.79
	Tukey's multiple comparisons test	Adjusted P Value
	Control vs. MPC+	<0.0001
	Control vs. Pcb-KO	0.3076
	Control vs. MPC+,Pcb-KO	0.0092
	MPC+ vs. MPC+,Pcb-KO	<0.0001
	Pcb-KO vs. MPC+,Pcb-KO	0.3419

## Sheet: e
	EV	MPC+	PCg5	PCg5, MPC+	PCg6	PCg6, MPC+
	760.597	280.028	556.83	813.542	547.041	573.109
	655.618	369.467	651.03	796.731	711.869	616.598
	798.226	369.991	580.695	657.709	693.386	610.053
	621.174	405.729	621.822	849.304	574.132	535.05
	774.471	356.037	711.386	643.14	624.571	654.784
	Tukey's multiple comparisons test	Adjusted P Value
	EV vs. MPC+	<0.0001
	EV vs. PCg5	0.2528
	EV vs. PCg5, MPC+	0.981
	EV vs. PCg6	0.3131
	EV vs. PCg6, MPC+	0.0816
	MPC+ vs. PCg5, MPC+	<0.0001
	MPC+ vs. PCg6, MPC+	0.0001
	PCg5 vs. PCg5, MPC+	0.0686
	PCg5 vs. PCg6, MPC+	0.9893
	PCg6 vs. PCg6, MPC+	0.9742

## Sheet: f
Control	MPC+	Pdha-KD	MPC+, Pdha-KD	Dlat-KD	MPC+, Dlat-KD
1.19058	48.9646	2.20076	53.2976	0.634635	49.1565
0.751928	32.9453	1.73628	55.3304	1.74231	45.992
1.11703	24.5389	2.7683	99.388	1.17691	81.3072

## Sheet: g
Control	MPC+	Pdha-KD	MPC+, Pdha-KD	Dlat-KD	MPC+, Dlat-KD
1.36983	38.3301	2.20076	49.1565	1.29385	48.9646
0.856782	49.7769	1.73628	45.992	1.69193	58.3907
0.852044	42.9744	2.7683	81.3072	1.43362	44.2826

## Sheet: h
Control	MPC+	Pdha-KD	MPC+, Pdha-KD
0.971532	1.23228	0.59297	0.398965
1.19693	0.938438	0.648434	0.504187
0.859955	1.41552	0.666202	0.367941

## Sheet: i
Control	MPC+	Dlat-KD	MPC+, Dlat-KD
1.3463	0.621031	0.181747	0.382624
0.865737	1.46296	0.379718	0.300617
0.857971	0.89751	0.294839	0.430176

## Sheet: k
	Control	MPC+	Pdha-KD	MPC+, Pdha-KD	Dlat-KD	MPC+, Dlat-KD	Pdk-KD	MPC+, Pdk-KD
	1998.02	989.193	1113.39	571.701	1315.93	674.012		1757.23
	2126.02	808.916	1244.05	616.575	1348.61	479.537		1869.71
	2172.45	1021.17	1330.22	530.634	1765.21	626.844	1741	1803.72
	2153.25	926.086	1179.66	1021.39	1727.24	311.123	2426.82	2592.98
	2035.46	641.472	1411.88		1528.19	451.8	2049.67	2273.62
	Control vs. MPC+	<0.0001
	Control vs. Pdha-KD	<0.0001
	Control vs. MPC+, Pdha-KD	<0.0001
	Control vs. Dlat-KD	0.0063
	Control vs. MPC+, Dlat-KD	<0.0001
	Control vs. Pdk-KD	>0.9999
	Control vs. MPC+, Pdk-KD	>0.9999
	MPC+ vs. MPC+, Pdha-KD	0.8796
	MPC+ vs. MPC+, Dlat-KD	0.1611
	MPC+ vs. MPC+, Pdk-KD	<0.0001
	Pdha-KD vs. MPC+, Pdha-KD	0.0095
	Dlat-KD vs. MPC+, Dlat-KD	<0.0001
	Pdk-KD vs. MPC+, Pdk-KD	>0.9999

[truncated: 7 more sheets: l, m, n, o, p, q, SF. 6r]
