# Supplementary material for: The fate of pyruvate dictates cell growth by modulating cellular redox potential
Source: eLife. 2025 Dec 16;13:RP103705. doi: 10.7554/eLife.103705 (PMC12707817; doi:10.7554/eLife.103705)
Supplement: Figure 4—source data 1. [file elife-103705-fig4-data1.xlsx]

## Sheet: b
Succinate M+2	EV					MPC+
0	0	0	0	0		0	0	0	0
1	0.114153	0.12479	0.11664	0.0785165		0.139173	0.134123	0.1421	0.144271
2	0.133355	0.184358	0.138793	0.132081		0.160116	0.168037	0.1738	0.170413
4	0.185687	0.204062	0.198391	0.199896	0.217805	0.207388	0.217911	0.22009	0.196093	0.208155

## Sheet: c
Succinate M+3	EV				MPC+
0	0	0	0	0	0	0	0	0
1	0.0175447	0.025814	0.0339195	0.026675	0.025173	0.011557	0.036733	0.041404
2	0.0271438	0.048495	0.0284644	0.045261	0.048097	0.049113	0.019816	0.052506
4	0.0674911	0.065174	0.0695535	0.054668	0.081327	0.075566	0.080863

## Sheet: d
Time (minutes)	EV								MPC+
1.31	67.6316	61.6128	73.874	82.1805	65.1198	64.7576	61.8167		62.9118	67.7793	67.4192	72.6951	66.6343	63.3399	65.2703	66.9921
7.8	67.1007	61.6031	71.6112	76.7113	60.9453	63.1506	61.0823		59.4603	62.8638	62.2426	65.8252	61.6071	58.9221	61.3542	65.1326
14.29	63.9287	59.1517	70.3411	75.0928	60.3334	63.9099	60.375		57.9544	61.8073	59.8366	64.2529	60.5248	57.7157	59.895	65.0552
20.87	47.343	41.9698	47.7652	52.4114	42.9766	49.2727	44.0796		43.2851	49.8569	43.9324	48.9025	47.6514	47.919	44.5755	48.121
27.36	48.0648	42.8676	48.6919	52.4767	43.2658	48.9385	44.0466		43.4736	50.4173	44.095	50.5542	48.0962	48.8411	44.826	49.1875
33.86	48.3518	43.1301	48.9522	52.2128	43.3056	49.1608	44.2767		43.2075	50.1296	43.7628	50.8981	48.0855	48.6306	44.329	49.069
40.45	39.9904	34.9138	40.1279	42.2793	34.9284	40.333	35.3687		32.6958	39.8792	33.2767	40.1754	38.065	37.5541	33.1425	38.4369
46.92	40.6011	35.5781	41.1252	42.7022	35.3147	41.1491	36.3036		33.9802	41.3238	34.8689	41.8583	39.5016	39.4458	34.7296	40.1198
53.43	40.9237	36.281	41.9652	43.5332	36.2156	41.8382	37.2139		35.4732	42.797	36.5346	43.7538	41.1932	40.9365	36.3486	41.5756
60.03	52.8294	47.1222	62.8754	70.8798	57.4852	66.9852	52.586		53.7882	60.848	50.9758	54.4149	59.5895	57.4838	55.5529	56.1076
66.55	54.3493	48.2568	64.6824	70.6732	54.8989	68.341	54.0483		50.7488	60.1541	49.8318	60.2808	58.6184	58.2092	52.1798	58.2471
73.05	57.2054	49.9155	66.2677	69.5792	54.8026	66.5775	55.1558		50.7801	60.0579	50.2981	63.3193	59.6491	56.7191	51.8592	60.3386
79.68	29.1228	25.088	28.1424	30.9622	25.2847	30.7701	25.4913		22.3677	28.8154	22.5364	30.1191	26.3198	29.1985	22.1842	25.9095
86.18	27.2505	23.9518	27.1543	30.3228	24.759	30.2396	24.7504		21.9185	27.2345	21.2096	28.3177	25.5374	27.9767	21.7018	24.7473
92.67	26.3915	22.9749	26.4426	29.5071	24.316	29.2749	23.8304		20.8623	26.4958	20.2662	27.3594	25.0803	27.0174	21.0267	24.0134

## Sheet: f
	Control	MP+	Pcb+	MPC+, Pcb+	Pcb-KD	MPC+, Pcb-KD
	1998.02	989.193	766.732	484.119	2180.28	1632.84
	2126.02	808.916	593.972	534.909	2581.41	1974.33
	2172.45	1021.17	799.197	485.057	2568.19	2317.26
	2153.25	926.086	699.221	649.221	2427.15	2026.69
	2035.46	641.472	696.027	579.36	2703.3
	Tukey's multiple comparisons test	Adjusted P Value
	Control vs. MP+	<0.0001
	Control vs. Pcb+	<0.0001
	Control vs. MPC+, Pcb+	<0.0001
	Control vs. Pcb-KD	0.0065
	Control vs. MPC+, Pcb-KD	0.8978
	MP+ vs. Pcb+	0.5538
	MP+ vs. MPC+, Pcb+	0.029
	MP+ vs. MPC+, Pcb-KD	<0.0001
	Pcb+ vs. MPC+, Pcb+	0.5653
	PC-KD vs. MPC+, PC-KD	0.0009

## Sheet: g
	Control	MPC+
	0.11	0.1358
	0.10749	0.1288
	0.1021	0.123144
ttest		0.0099

## Sheet: h
	hemolymph glucose			hemolymph trehalose
	Control	MPC+		Control	MPC+
	0.20071	0.432331		2.38379	3.24196
	0.195906	0.399123		2.41226	3.4311
	0.20071	0.24718		2.41204	3.27431
ttest		0.0481			0.0034

## Sheet: j
	EV	MPC+
	0.9112	11.9326
	1.13057	8.57196
	1.29177	3.80381
Unpaired t test		0.0415

## Sheet: k
	EV	MPC+
	0.884746	8.84588
	1.04033	2.8595
	1.07493	7.36079
Unpaired t test		0.041

## Sheet: 4
	EV	MPC+	PC-KO	MPC+, PC-KO	PEPCK2-KO	MPC+, PEPCK2-KO
	8.27677	6.69868	8.89016	7.6596	7.84745	11.5547
	8.70627	6.41736	9.97255	8.4811	9.64722	10.7567
	7.41114	5.88758	10.8385	8.02873	10.6127	8.92752
	7.16936	6.89859	10.8203	8.27557	12.7433	8.98155
	7.92828	6.93538	10.3537	7.55152	12.2484	9.81965
	7.6019	6.30238	11.9948	9.45671	12.4384	11.3238
	7.95509	5.2579	12.4109	10.1565	10.2307	9.49548
	8.36122	6.09138	12.5301	9.37214	9.84417	9.44212
	9.26277	6.54973	11.2861	9.15666	9.98696	8.94306
	9.34179	5.35028	9.99895	11.082	12.0003	11.2492
	9.67367	6.07871	12.2969	10.5515	12.5194	11.7807
	8.60911	6.5353	11.0038	9.90828	13.5382	9.41096
	8.20582	6.45138	10.4903	9.80392	10.5912	10.063
	8.28275	6.66913	9.7852	9.96197	10.6755	10.0845
	7.70725	6.93464	10.1013	10.9075	9.77447	12.0419
	7.60695	6.17012	11.1393	12.3714	11.6095	11.0526
	7.7182	5.01649	11.6607	8.1463	8.78917	11.9688
	8.24537	6.12206	10.9326	11.6939	12.3361	10.1131
			12.2286	12.3003	11.7624	9.85653
	Tukey's multiple comparisons test				Adjusted P Value
	EV vs. MPC+				<0.0001
	EV vs. PC-KO				<0.0001
	EV vs. MPC+, PC-KO				0.0012
	EV vs. PEPCK2-KO				<0.0001
	EV vs. MPC+, PEPCK2-KO				<0.0001
	MPC+ vs. MPC+, PC-KO				<0.0001
	MPC+ vs. MPC+, PEPCK2-KO				<0.0001
	PC-KO vs. MPC+, PC-KO				0.0102
	PEPCK2-KO vs. MPC+, PEPCK2-KO				0.4816

## Sheet: o
	Control	MPC+	Pepck2-KD	MPC+, Pepck2-KD	Fbp-KD	MPC+, Fbp-KD
	2469.99	719.487	3320.35	1802.16	2417.49	1616.53
	2633.13	757.562	3146.2	1957.79	2042.26	1679.17
	2628.81	1088.2	3262.68	2229.21	2118.98	1460.31
	2784.06	1017.83	2706.92	1848.61	2684.4	1053.01
	2572.16	611.025	2770.75	1644.94	2459.49	1032.26
	Tukey's multiple comparisons test	Adjusted P Value
	Control vs. MPC+	<0.0001
	Control vs. Pepck2-KD	0.0941
	Control vs. MPC+, Pepck2-KD	0.001
	Control vs. Fbp-KD	0.4862
	Control vs. MPC+, Fbp-KD	<0.0001
	MPC+ vs. Pepck2-KD, MPC-OE	<0.0001
	MPC+ vs. Fbp-KD, MPC-OE	0.0209
	Pepck2-KD vs. MPC+, Pepck2-KD	<0.0001
	Fbp-KD vs. MPC+, Fbp-KD	<0.0001

[truncated: 1 more sheets: q]
