# Supplementary material for: The fate of pyruvate dictates cell growth by modulating cellular redox potential
Source: eLife. 2025 Dec 16;13:RP103705. doi: 10.7554/eLife.103705 (PMC12707817; doi:10.7554/eLife.103705)
Supplement: Figure 5—figure supplement 1—source data 1. [file elife-103705-fig5-figsupp1-data1.xlsx]

## Sheet: d
	EV	MPC+
	1.18905	2.35749
	0.971621	2.53898
	0.839326	2.2892
Unpaired t test		0.0004

## Sheet: e
	EV	MPC+
	1.02677	2.60394
	0.858236	5.97225
	1.09242	3.1032
	1.4242	6.91742
	1.82407	3.55962
	1.87159	2.496
Unpaired t test		0.0056

## Sheet: f
	EV	MPC+
	1.63626	2.90819
	1.51079	3.96468
	1.68302	2.99991
Unpaired t test		0.0033

## Sheet: g
	EV	MPC+
	0.82928	0.888963
	1.07879	0.820509
	1.09305	0.938533
Unpaired t test		0.7432

## Sheet: h
	EV	MPC+
	1.97311	3.27144
	1.40045	3.83197
	1.53976	3.19638
Unpaired t test		0.0106

## Sheet: i
	EV	MPC+	EV, gramicidin	MPC+, gramicidin
	725.499	618.114	682.756	683.278
	933.383	584.204	950.397	411.778
	935.021	435.578	681.426	598.485
	842.367	438.769	724.061	464.053
	1109.29	583.622	884.538	543.528
Tukey's multiple comparisons test	Adjusted P Value
EV vs. MPC+	0.0006
EV vs. EV, gramicidin	0.3636
EV vs. MPC+, gramicidin	0.0007
MPC+ vs. MPC+, gramicidin	0.9995
EV, gramicidin vs. MPC+, gramicidin	0.0209

## Sheet: k
	MPC-	MPC+	NDI+	MPC+, NDI+
	8.84085	5.53433	9.30735	7.07531
	7.65896	6.38076	8.45493	6.87793
	8.64563	4.21436	8.52091	7.17783
	7.14479	7.09772	9.22407	7.22577
	7.92968	5.89921	8.41676	7.20049
	7.48973	6.92216	8.49281	6.58898
	5.98546	6.35034	8.15717	7.02468
	7.03927	6.93772	8.4094	7.47741
	7.80459	6.72233	8.18544	7.32747
	7.63259	5.146	8.78227	7.54182
	8.30376	4.74551	8.43451	7.80449
	7.98619	4.66412	8.867	7.25004
	8.80315	4.64834	8.94905	6.75763
	9.25934	4.98507	9.19644	7.06861
	7.99546	4.62226	9.6346	7.02245
	8.40754	3.72895	8.63414	7.89331
	8.59985	6.6277	9.34145	7.34899
	8.37134	5.28519	9.83366	6.8048
	9.17633	5.68411	8.15791	6.68157
	8.91241	5.66898	7.71096	7.0275
	7.718	5.83441	8.34147	6.68524
	10.398	5.27322	7.59831	7.96036
	7.72323	5.27518	8.84661	7.08236
	7.92147	5.42479	8.5309	6.89763
	7.99784	5.6888	8.47978	6.90595
	7.8824	5.68591	8.73016	5.39804
	8.93181	4.53426	7.52396	6.6347
	8.80274	4.67887	8.63983	7.42757
	8.80072	5.29509	9.2604	6.916
	8.32985	5.58358	8.31238	7.08618
	7.7711		7.19826	7.57548
Tukey's multiple comparisons test	Adjusted P Value
MPC- vs. MPC+	<0.0001
MPC- vs. NDI+	0.1406
MPC- vs. MPC+, NDI+	<0.0001
MPC+ vs. MPC+, NDI+	<0.0001
NDI+ vs. MPC+, NDI+	<0.0001

## Sheet: l
	EV	MPC+	EV duroquinone	MPC+ duroquinone
	725.499	618.114	1210.98	1106.65
	933.383	584.204	1140.46	1079.19
	935.021	435.578	1332	977.8
	842.367	438.769	981.629	1306.45
	1109.29	473.29	1152.18	566.177
				699.909
Tukey's multiple comparisons test	Adjusted P Value
EV vs. MPC+	0.0131
EV vs. EV duroquinone	0.1544
EV vs. MPC+ duroquinone	0.9725
MPC+ vs. MPC+ duroquinone	0.0039
EV duroquinone vs. MPC+ duroquinone	0.2642
