# Supplementary material for: The fate of pyruvate dictates cell growth by modulating cellular redox potential
Source: eLife. 2025 Dec 16;13:RP103705. doi: 10.7554/eLife.103705 (PMC12707817; doi:10.7554/eLife.103705)
Supplement: Figure 5—source data 1. [file elife-103705-fig5-data1.xlsx]

## Sheet: a
	Cytoplasm		mitochondria
	Control	MPC+	Control	MPC+
	0.394208	0.51144	0.951682	1.08734
	0.446951	0.488752	0.871022	1.161
	0.35606	0.655919	0.812185	1.43127
	0.296404	0.490087	0.747718	1.24626
	0.396195	0.688251	0.355984	1.22311
	0.443905	0.761024	0.785567	1.45501
Unpaired t test with Welch's correction		0.0022		0.0008

## Sheet: b
	Cytoplasm		mitochondria
	EV	MPC+	EV	MPC+
	0.558512	0.630999	0.607375	1.70253
	0.587855	0.873527	0.763517	1.79584
	0.684386	0.868603	0.665779	1.28154
	0.554946	0.868603	0.633735	1.09505
	0.673869	0.873527	0.607375	1.2499
			0.763517	1.52398
			1.10169	1.52213
			1.09747	1.4208
Unpaired t test with Welch's correction		0.0079		<0.0001

## Sheet: d
	Control	MPC+	Nmnat+	MPC+, Nmnat+
	1998.02	719.487	2259.19	1861.59
	2126.02	757.562	1842.08	1842.77
	2172.45	1088.2	2411.96	1690.58
	2153.25	1017.83	3489.65	1549.63
	2035.46	611.025		1335.26
Tukey's multiple comparisons test	Adjusted P Value
Control vs. MPC+	0.0002
Control vs. Nmnat+	0.3535
Control vs. MPC+, Nmnat+	0.2386
MPC+ vs. MPC+, Nmnat+	0.0109
Nmnat+ vs. MPC+, Nmnat+	0.0131

## Sheet: f
	Control	MPC+	NDI+	MPC+, NDI+	NDX+	MPC+, NDX+
	1998.02	719.487	2348.73	1656.47	2477.91	1641.51
	2126.02	757.562	2004.03	1741.87	2013.97	1715.37
	2172.45	1088.2	1973.96	1286.56	2053.19	1806.67
	2153.25	1017.83		1228.49	2111.37	1588.28
	2035.46	611.025
Tukey's multiple comparisons test	Adjusted P Value
Control vs. MPC+	<0.0001
Control vs. NDI+	>0.9999
Control vs. MPC+, NDI+	0.0009
Control vs. NDX+	0.9934
Control vs. MPC+, NDX+	0.036
MPC+ vs. MPC+, NDI+	0.0006
MPC+ vs. MPC+, NDX+	<0.0001
NDI+ vs. MPC+, NDI+	0.0029
NDX+ vs. MPC+, NDX+	0.0174

## Sheet: h
	EV	MPC+	NR EV	NR MPC+	NMN EV	NMN MPC+
	6.275	4.55975	6.83965	7.40426	7.55996	7.84988
	6.44996	6.20932	8.42554	7.65314	7.91866	7.6285
	6.4544	4.75719	7.91362	6.69457	8.08275	7.27425
	6.67438	4.87905	6.83965	6.84816	8.19918	7.27425
	6.19275	5.29177	8.54682	7.40426	6.35187	7.9278
	7.37443	4.78371	7.57211	7.0459	6.98257	7.80091
	7.38067	4.73331	8.01877	7.21936	7.18997	7.70496
	6.46094	4.78135	8.22766	7.38142	6.8878	7.70496
	6.60948	4.64771	8.05514	7.36454	8.02846	7.17644
	6.88145	4.88205	7.28277	6.44732	8.20266	8.36669
	6.7209	4.67629	8.4219	6.99652	7.39928	7.84745
	6.59654	4.40732	8.88159	7.97378	8.01056	7.88415
	6.60551	4.67982	8.70713	6.91239	7.82476	7.82675
	7.15889	4.28573	8.72649	7.65795	7.79814	7.66636
	6.5615	4.59579	7.57156	7.15724	7.26379	7.92077
	7.04732	4.8744	7.93214	6.26908	7.12751	7.48212
Tukey's multiple comparisons test	Adjusted P Value
EV vs. MPC+	<0.0001
EV vs. NR	<0.0001
EV vs. NR MPC+	0.0991
EV vs. NMN	<0.0001
EV vs. NMN MPC+	<0.0001
MPC+ vs. NR MPC+	<0.0001
MPC+ vs. NMN MPC+	<0.0001
NR vs. NR MPC+	<0.0001
NMN vs. NMN MPC+	0.9331

## Sheet: j
	Control	MPC+	NDX+	MPC+, NDX+
	1.32928	0.404103	0.881815	1.04694
	1.28128	0.529731	0.725891	0.829974
	0.982628	0.373002	0.899136	0.857318
	0.944006	0.655328	1.0046	0.624705
	0.511013	0.61601	1.05098	1.0486
	0.982969	0.449743	1.20562	0.95285
	0.968711	0.690727	0.927174	0.87745
	0.902813	0.648364	0.820268	1.06777
	0.952578	0.44381	1.03389	0.9763
	1.14782	0.61746	1.03368	1.07875
	1.08939	0.458762	0.649065	0.786256
	1.1177	0.700033	0.831308	0.624023
	1.04028	0.520979	1.09681	1.33156
	1.04295	0.593596	1.19769	0.963374
	0.906697	0.626253	1.31806	1.16436
	1.12566	0.568408	1.19498	1.17449
	1.08911	0.593242	1.1206	0.599381
	0.961122	0.580742	1.04428	0.696905
	0.958807	0.537481	0.942376	0.646738
	0.876308	0.525307	1.05638	0.773238
	0.60069	0.608052	1.12978	0.90932
	1.00922	0.462078	1.22366	0.596257
	0.958295	0.479221	0.857017	0.642572
	0.905889	0.382486	0.876404	0.456178
	0.829401	0.434606	1.0995	0.972716
	1.09982	0.397727	1.15344	0.520793
	1.00128	0.364412	1.0274	0.818981
	0.969824	0.528012	1.2504	0.946019
	1.00169	0.718177	1.10472	0.862618
	1.04201	0.411113	1.06357	0.754812
	1.10964		0.989093	1.14787
	1.06105		0.988519	0.637979
	0.894184			0.697234
	0.970045			1.23918
	0.919933			1.28519
	0.926805			0.944487
	0.998459			0.959316
Tukey's multiple comparisons test	Adjusted P Value
Control vs. MPC+	<0.0001
Control vs. NDX+	0.7761
Control vs. MPC+, NDX+	0.0297
MPC+ vs. MPC+, NDX+	<0.0001
NDX+ vs. MPC+, NDX+	0.0021

## Sheet: k
		EV			MPC+			two way ANOVA
	untreated	0.887949	1.15786	1.16279	0.648276	0.565517	0.648276
	NR	0.902044	0.994362	1.03665	0.846552	0.825862	0.751724	0.0375	Adjusted P Value (untreated MPC+ vs NR, MPC+ )
	NMN	1.01268	1.105	1.07752	0.708621	0.839655	0.855172	0.0449	Adjusted P Value (untreated MPC+ vs NMN, MPC+)
