# Supplementary material for: The fate of pyruvate dictates cell growth by modulating cellular redox potential
Source: eLife. 2025 Dec 16;13:RP103705. doi: 10.7554/eLife.103705 (PMC12707817; doi:10.7554/eLife.103705)
Supplement: Figure 6—figure supplement 1—source data 1. [file elife-103705-fig6-figsupp1-data1.xlsx]

## Sheet: b
	MPC-	MPC+	MPC-, Asp+	MPC+, Asp+	MPC-, Glu+	MPC+, Glu+
	7.91302	7.11677	9.11108	8.72703	10.4101	9.26
	8.53948	6.5988	9.93832	9.68197	9.26233	9.38451
	9.58978	7.39622	10.0113	9.58273	9.1622	10.7507
	9.14764	7.07543	9.76263	9.32751	9.19795	9.46936
	8.27599	6.69192	9.88226	8.54132	8.97479	8.5147
	8.61027	6.93658	9.96701	9.14764	8.58976	8.10011
	8.73635	7.13509	10.1853	10.3537	9.41507	9.77581
	9.30309	5.97159	8.82444	10.7607	8.03343	9.32914
	8.03889	5.6178	8.14839	10.8261	10.425	8.00676
	8.26133	7.30313	11.5343	7.82288	9.29365	6.03783
	9.02363	7.371	9.94307	9.22344	8.17536	7.13732
	8.46403	6.13811	9.36082	8.08654	8.41552	5.84874
	8.21089	7.43449	11.0228	8.93203	8.4341	7.35785
	9.83075	7.89771	10.0851	8.85938	8.27115	7.05148
	9.36878	6.33366	9.9409	9.116	9.01354	6.85476
Tukey's multiple comparisons test	Adjusted P Value
MPC- vs. MPC+	<0.0001
MPC- vs. MPC-, Asp+	0.0153
MPC- vs. MPC+, Asp+	0.6247
MPC- vs. MPC-, Glu+	0.9725
MPC- vs. MPC+, Glu+	0.524
MPC+ vs. MPC+, Asp+	<0.0001
MPC+ vs. MPC+, Glu+	0.0016
MPC-, Asp+ vs. MPC+, Asp+	0.4855
MPC-, Glu+ vs. MPC+, Glu+	0.1407

## Sheet: d
	MPC-	MPC+	SLC1A3+	MPC+, SLC1A3+
	8.84085	5.53433	8.16229	6.739
	7.65896	6.38076	9.27936	6.75156
	8.64563	4.21436	8.76745	6.57292
	7.14479	7.09772	7.68522	7.276
	7.92968	5.89921	8.9796	6.38671
	7.48973	6.92216	8.64468	6.702
	5.98546	6.35034	8.01547	6.05491
	7.03927	6.93772	7.93885	8.32645
	7.80459	6.72233	7.30759	8.99821
	7.63259	5.146	7.76675	6.33406
	8.30376	4.74551	8.81166	6.55775
	7.98619	4.66412	7.61711	6.51328
	8.80315	4.64834	8.18612	6.70695
	9.25934	4.98507	9.32093	6.64043
	7.99546	4.62226	8.83634	6.41731
	8.40754	3.72895	9.17173	6.44702
	8.59985	6.6277	9.43342	6.58795
	8.37134	5.28519	8.36248	8.77286
	9.17633	5.68411	9.31113	8.47945
	8.91241	5.66898	7.86455	8.62547
	7.718	5.83441	7.73489	6.491
	10.398	5.27322	8.49572	6.69259
	7.72323	5.27518	7.96661	7.28048
	7.92147	5.42479	9.10714	5.93194
	7.99784	5.6888	8.92177	6.61674
	7.8824	5.68591	8.91683	6.94412
	8.93181	4.53426	8.61532	8.55753
	8.80274	4.67887	8.41631	6.28093
	8.80072	5.29509	8.83975	6.33775
	8.32985	5.58358	8.96939	6.80917
	7.7711		9.10399	6.28642
			7.45336
Tukey's multiple comparisons test	Adjusted P Value
MPC- vs. MPC+	<0.0001
MPC- vs. SLC1A3+	0.4456
MPC- vs. MPC+, SLC1A3+	<0.0001
MPC+ vs. MPC+, SLC1A3+	<0.0001
SLC1A3+ vs. MPC+, SLC1A3+	<0.0001

## Sheet: e
	EV			MPC+
+	1.12896	1.26145	0.847075	0.582759	0.644828	0.613793	p value ttest(MPC+3XNEAA vs untreated MPC+)	0.00279806
3X NEAA	1.14447	1.29457	1.17054	0.831034	0.925862	0.860345	p value ttest(MPC+3XNEAA vs EV+3XNEAA)	0.00668874

## Sheet: f
Control	MPC+	Got2-KD	MPC+, Got2-KD	Got2+	MPC+, Got2+
1.05044	47.1722	1.19997	42.6745	1.34443	53.4456
0.911301	45.8449	1.07699	52.4183	1.61217	68.0725
1.04464	55.9087	1.41716	40.5885	1.70527	72.2037
			Adjusted P Value
Control vs. MPC+			<0.0001
Control vs. Got2-KD			>0.9999
Control vs. MPC+, Got2-KD			<0.0001
Control vs. Got2+			>0.9999
Control vs. MPC+, Got2+			<0.0001
MPC+ vs. MPC+, Got2-KD			0.9007
MPC+ vs. MPC+, Got2+			0.0417
Got2-KD vs. MPC+, Got2-KD			<0.0001
Got2+ vs. MPC+, Got2+			<0.0001

## Sheet: g
Control	MPC+	Got2-KD	MPC+, Got2-KD	Got2+	MPC+, Got2+
1.08323	30.357	1.81294	24.405	1.64072	40.3474
0.885972	39.9301	1.87558	33.6703	2.78627	42.1776
1.04198	30.6413	1.99769	28.6488	2.67091	46.4113
			Adjusted P Value
Control vs. MPC+			<0.0001
Control vs. Got2-KD			0.9992
Control vs. MPC+, Got2-KD			<0.0001
Control vs. Got2+			0.9942
Control vs. MPC+, Got2+			<0.0001
MPC+ vs. MPC+, Got2-KD			0.4921
MPC+ vs. MPC+, Got2+			0.0346
Got2-KD vs. MPC+, Got2-KD			<0.0001
Got2-KD vs. MPC+, Got2+			<0.0001
Got2+ vs. MPC+, Got2+			<0.0001

## Sheet: h
Control	MPC+	Got2-KD	MPC+, Got2-KD	Got2+	MPC+, Got2+
0.777726	0.678459	0.140567	0.18964	7.55619	6.82739
1.17636	1.49623	0.104555	0.263401	10.3484	7.45565
1.09303	1.37968	0.138152	0.256198	8.09109	7.70254
			Adjusted P Value
Control vs. MPC+			0.9976
Control vs. Got2-KD			0.382
Control vs. MPC+, Got2-KD			0.4951
Control vs. Got2+			<0.0001
Control vs. MPC+, Got2+			<0.0001

## Sheet: i
	EV	MPC+	GOT1-KD g1	MPC+, GOT1-KD g1	GOT1-KD g2	MPC+, GOT1-KD g2
	700.294	383.55	430.323	440.204	406.234	480.682
	672.608	449.604	363.097	499.914	442.984	576.655
	759.991	419.041	415.572	525.393	463.206	508.212
	725.907	461.17	463.807	526.927	527.801	599.332
	691.604	434.288	399.662	380.37	523.889	653.378
Tukey's multiple comparisons test	Adjusted P Value
EV vs. MPC+	<0.0001
EV vs. GOT1-KD g1	<0.0001
EV vs. MPC+, GOT1-KD g1	<0.0001
EV vs. GOT1-KD g2	<0.0001
EV vs. MPC+, GOT1-KD g2	0.0014
MPC+ vs. MPC+, GOT1-KD g1	0.7148
MPC+ vs. MPC+, GOT1-KD g2	0.0035
GOT1-KD g1 vs. MPC+, GOT1-KD g1	0.429
GOT1-KD g2 vs. MPC+, GOT1-KD g2	0.0805

## Sheet: k
	EV	MPC+	GOT2+	MPC+, GOT2+
	6.275	4.55975	6.1906	6.57902
	6.44996	6.20932	8.08639	7.58153
	6.4544	4.75719	6.47686	6.60557
	6.67438	4.87905	7.11305	7.36728
	6.19275	5.29177	6.58565	6.67888
	7.37443	4.78371	7.03362	7.03683
	7.38067	4.73331	7.19175	6.78606
	6.46094	4.78135	6.8325	8.8425
	6.60948	4.64771	7.57603	6.36542
	6.88145	4.88205	8.27211	6.27368
	6.7209	4.67629	7.81369	7.6951
	6.59654	4.40732	7.75837	6.17168
	6.60551	4.67982	6.16191	6.25956
	7.15889	4.28573	6.72702	7.15122
	6.5615	4.59579	6.97173	6.82555
	7.04732	4.8744	6.94496	6.78606
Tukey's multiple comparisons test	Adjusted P Value
EV vs. MPC+	<0.0001
EV vs. GOT2+	0.1871
EV vs. MPC+, GOT2+	0.6594
MPC+ vs. MPC+, GOT2+	<0.0001
Got2+ vs. MPC+, GOT2+	0.8138
