# Supplementary material for: The fate of pyruvate dictates cell growth by modulating cellular redox potential
Source: eLife. 2025 Dec 16;13:RP103705. doi: 10.7554/eLife.103705 (PMC12707817; doi:10.7554/eLife.103705)
Supplement: Figure 6—source data 1. [file elife-103705-fig6-data1.xlsx]

## Sheet: a
	EV					MPC+					ttest
Glycine	0.98791	0.815963	1.03231	0.860137	1.30368	0.553208	0.407006	0.593459	0.40938	0.568205	0.00232678
L-Alanine	0.947217	0.97737	1.04621	1.1078	0.921396	0.718699	0.723526	0.714062	0.73924	0.765438	0.000915317
L-Valine	0.998149	0.966298	1.10742	0.942966	0.985163	0.630145	0.624778	0.638098	0.604743	0.719889	1.5301e-05
L-Leucine	0.975721	0.861313	1.06204	1.07154	1.02938	0.895029	1.02783	0.87334	0.944003	1.03001	0.389914
L-Isoleucine	0.970575	0.90809	1.07869	1.02547	1.01718	0.628074	0.663059	0.645541	0.636908	0.791652	5.0814e-05
L-Proline	0.946988	0.994324	1.02591	1.1345	0.898288	0.671872	0.684877	0.651476	0.623442	0.721698	0.000469302
L-Phenylalanine	0.952196	0.823233	1.10646	0.990851	1.12726	0.788836	0.794431	0.873314	0.747137	0.954737	0.0392526
L-Tyrosine	1.0476	1.03098	0.973657	0.927101	1.02066	0.621625	0.51734	0.675628	0.487588	0.648782	4.7841e-05
L-Tryptophan	1.02185	1.10178	0.973863	0.955134	0.947369	0.554441	0.463884	0.601671	0.435663	0.498973	2.52148e-06
L-Serine	0.960823	1.05042	1.0676	1.00021	0.920953	0.556091	0.508888	0.643894	0.484769	0.607263	4.62351e-06
L-Threonine	1.0062	1.10453	1.05212	0.855677	0.981477	0.562127	0.502546	0.642542	0.388641	0.633977	9.57489e-05
L-Glutamine	1.35655	1.12509	0.808858	0.640298	1.06921	0.513543	0.434978	0.470031	0.423496	0.470824	0.0122124
L-Aspartic acid	0.934646	1.17351	1.13681	0.820066	0.934969	0.43768	0.410482	0.638868	0.317671	0.566761	0.000368401
L-Glutamic acid	0.909908	0.925488	1.15439	1.12749	0.882726	0.594632	0.643577	0.60955	0.626952	0.669625	0.00243596
L-Lysine	0.763729	0.710635	1.28546	0.921329	1.31884	0.623366	0.693993	1.15728	0.616729	1.1657	0.434757
Asparagine	1.15288	0.899514	1.14979	0.963643	0.834167	0.481666	1.01575	1.08673	0.554902	0.76899	0.160193
Methionine	0.978777	0.767412	1.11616	1.07079	1.06686	1.10549	1.53326	0.973105	0.948585	0.916615	0.489743
Cysteine	1.0128	0.929024	1.02709	1.10101	0.930073	0.85117	1.06387	1.31766	1.2777	1.35939	0.145976
Histidine	0.817773	0.973436	0.787522	1.16664	1.25463	0.794304	0.968569	1.19975	1.57665	1.18323	0.397686

## Sheet: c
	EV	MPC+	EV, +2x NEAA	MPC+, +2x NEAA	EV, +3x NEAA	MPC+, +3x EAA
	6.275	4.55975	7.11882	6.28912	5.9101	5.61829
	6.44996	6.20932	6.43563	5.90564	5.96769	5.71728
	6.4544	4.75719	6.66724	5.86057	7.06905	5.83826
	6.67438	4.87905	6.81373	6.75526	6.42346	5.54602
	6.19275	5.29177	6.5304	6.43432	6.08628	5.99911
	7.37443	4.78371	6.49925	6.19867	7.19599	5.4849
	7.38067	4.73331	7.0459	5.70496	7.11965	5.73471
	6.46094	4.78135	7.11546	6.78834	6.13644	5.61242
	6.60948	4.64771	7.16373	6.14851	7.29296	5.79644
	6.88145	4.88205	6.21285	5.94305	6.55895	5.94373
	6.7209	4.67629	6.32354	6.78834	6.11098	5.86672
	6.59654	4.40732	6.78834	6.46451	7.11965	6.3787
	6.60551	4.67982	6.78144	5.8564	6.33216	5.42189
	7.15889	4.28573	7.98446	5.96871	6.75511	5.7141
	6.5615	4.59579	7.16294	5.82883	6.06402	6.23136
	7.04732	4.8744	7.55448	5.92932	6.75511	6.08053
Tukey's multiple comparisons test	Adjusted P Value
EV vs. MPC+	<0.0001
EV vs. EV, +2x NEAA	0.8336
EV vs. MPC+, +2x NEAA	0.0041
EV vs. EV, +3x NEAA	0.8746
EV vs. MPC+, +3x EAA	<0.0001
MPC+ vs. MPC+, +2x NEAA	<0.0001
MPC+ vs. MPC+, +3x EAA	<0.0001
EV, +2x NEAA vs. MPC+, +2x NEAA	<0.0001
EV, +2x NEAA vs. EV, +3x NEAA	0.1978
MPC+, +2x NEAA vs. MPC+, +3x EAA	0.1152
EV, +3x NEAA vs. MPC+, +3x EAA	<0.0001

## Sheet: f
	Control	MPC+	Control, 5XNEAA	MPC+, 5XNEAA
	1848.31	944.436	1772.48	1492.03
	1880.37	952.553	2009.24	1494.53
	2490.57	1227.82	1628.23	1290.05
	2216.82	737.872	2160.14	1642.05
	2022.16	906.3	2003.79	1848
Tukey's multiple comparisons test	Adjusted P Value
Control vs. MPC+	<0.0001
Control vs. Control, 5XNEAA	0.5851
Control vs. MPC+, 5XNEAA	0.0062
MPC+ vs. MPC+, 5XNEAA	0.0025
Control, 5XNEAA vs. MPC+, 5XNEAA	0.078

## Sheet: g
	Control	MPC+	slif+	MPC+, slif+
	2465.5	664.088	2339.34	2395.98
	2611.77	774.801	2312.01	2347.65
	2631.49	1112.16	2561.57	2101.64
	2776.48	981.033	2569.74	1411.76
	2593.37	617.337	2309.81	2039.66
Tukey's multiple comparisons test	Adjusted P Value
Control vs. MPC+	<0.0001
Control vs. slif+	0.5749
Control vs. MPC+, slif+	0.01
MPC+ vs. MPC+, slif+	<0.0001
slif+ vs. MPC+, slif+	0.1235

## Sheet: h
	EV					MPC+					Adjusted P Value
-	635.52	586.262	715.582	627.615	645.829	383.42	523.881	474.854	424.667	433.706	<0.0001
Gly	520.897	572.794	593.861	540.596	552.166	371.323	418.316	438.563	455.064	395.959	0.0005
Ala	560.229	655.84	575.22	638.726	559.622	321.374	410.263	419.133	382.929	392.385	<0.0001
Ser	565.381	674.734	598.461	538.914	618.487	284.992	360.094	408.704	494.298	452.239	<0.0001
Asp	748.059	711.97	739.478	649.221	711.105	657.048	597.698	706.828	755.019	601.297	0.7057
Glu	656.899	851.515	785.663	695.403	609.44	621.812	627.444	635.276	676.792	603.231	0.0742
Pro	734.433	747.933	779.743	764.508	665.434	685.426	533.454	649.075	648.624	660.786	0.0189
Asn	659.065	622.046	640.931	640.33	620.459	564.601	591.5	544.381	574.304	573.641	0.3015

## Sheet: j
	Control	MPC+	Got2-KD	MPC+, Got2-KD	Got2+	MPC+, Got2+
	1998.02	989.193	1429.35	1374.84	2398.85	1438.28
	2126.02	808.916	1150.77	1413.22	2290.51	1668.7
	2172.45	1021.17	1283.63	1360.62	2200	1992.41
	2153.25	926.086	1292.18	1183.3	2308.98	1511.34
	2035.46	641.472	1614.3	1243.92	2203.91	2540.52
Tukey's multiple comparisons test	Adjusted P Value
Control vs. MPC+	<0.0001
Control vs. Got2-KD	0.0002
Control vs. MPC+, Got2-KD	<0.0001
Control vs. Got2+	0.7591
Control vs. MPC+, Got2+	0.3967
MPC+ vs. Got2-KD	0.0206
MPC+ vs. MPC+, Got2-KD	0.0391
MPC+ vs. Got2+	<0.0001
MPC+ vs. MPC+, Got2+	<0.0001
GOT2-KD vs. MPC+, Got2-KD	0.9997
GOT2+ vs. MPC+, Got2+	0.032

## Sheet: k
		EV			MPC+			two way ANOVA (untreated MPC+ vs treated MPC+)
untreated		0.71974	0.733412	0.575865	2.04783	1.47125	1.73608
UK5099		0.268097	0.266403	0.29317	0.446303	0.320635	0.4036	<0.0001
NMN		0.954284	1.21772	1.71882	0.521359	0.619722	1.08788	0.0002
Asp		0.333697	0.606419	0.554084	0.801129	0.52613	0.642188	<0.0001
Tukey's multiple comparisons test	EV	- vs. UK5099	0.1502
		- vs. NMN	0.0142
		- vs. Asp	0.7489
	MPC+	- vs. UK5099	<0.0001
		- vs. NMN	0.0002
		- vs. Asp	<0.0001

## Sheet: m
	EV			MPC+			p value
DMSO	1	1	1	0.752802	0.697095	0.669402	0.027902
UK5099	0.889071	0.870791	1.17929	1.22722	0.916573	0.796505	>0.999999
NMN	1.17768	0.9291	1.11251	1.21286	1.01489	0.90348	>0.999999
Asp	1.30498	0.841936	0.852592	1.12399	1.04157	0.871153	>0.999999
