# Supplementary material for: The fate of pyruvate dictates cell growth by modulating cellular redox potential
Source: eLife. 2025 Dec 16;13:RP103705. doi: 10.7554/eLife.103705 (PMC12707817; doi:10.7554/eLife.103705)
Supplement: Figure 7—source data 1. [file elife-103705-fig7-data1.xlsx]

## Sheet: c
	GFP+	MPC+
	2846.72	1815.92
	3308.71	1698.96
	1946.28	734.929
	2032.61	894.55
	Unpaired t test	0.0269

## Sheet: d
	GFP+	MPC+
	104.419	37.9832
	98.0876	48.2933
	103.289	35.7441
	98.2725	53.9469
		35.6163
	Unpaired t test	<0.0001

## Sheet: e
	GFP+				MPC+				Adjusted P Value
Cytoplasm	1.18161	1.20422	1.26256	1.27611	1.4117	1.41951	1.6859	1.58851	0.0014
mitochondria	1.1345	1.07013	1.27419	1.09485	1.27458	1.81013	1.457	1.52192	0.0014

## Sheet: f
	GFP +	MPC+	GFP+, UK5099	MPC+, UK5099
	1.63234	1.6991	0.405596	0.491803
	1.54104	2.01981	0.352364	0.496139
	1.49385	2.11884	0.414621	0.413626
	1.47675	1.99475	0.465081	0.450796
Tukey's multiple comparisons test	Adjusted P Value
GFP + vs. MPC+	0.0004
GFP + vs. GFP+, UK5099	<0.0001
GFP + vs. MPC+, UK5099	<0.0001
MPC+ vs. MPC+, UK5099	<0.0001
GFP+, UK5099 vs. MPC+, UK5099	0.8758
