# Supplementary figures and images for: The fate of pyruvate dictates cell growth by modulating cellular redox potential
Source: eLife journal article supplement (doi:10.7554/elife.103705), 2024-12-30

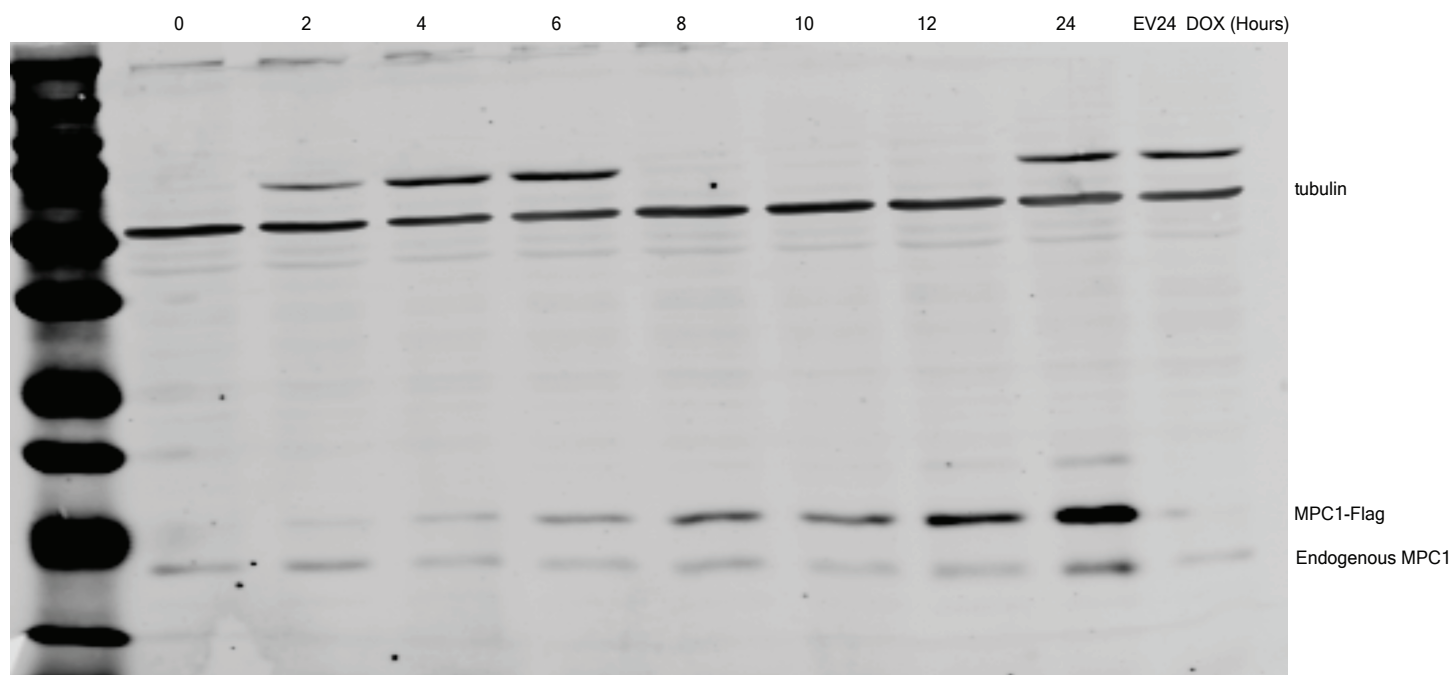

Supplement: fig3-data3 [file Source data Figure 3a uncropped western blots 1.pdf › Figure 3-source data 2- PDF files containing originall western blots for Figure 3a,indicating the relevant bands and treatments./Source data Figure 3a uncropped western blots 1.pdf]

0 2 4 6 8 10 12 24 EV24 DOX (Hours)

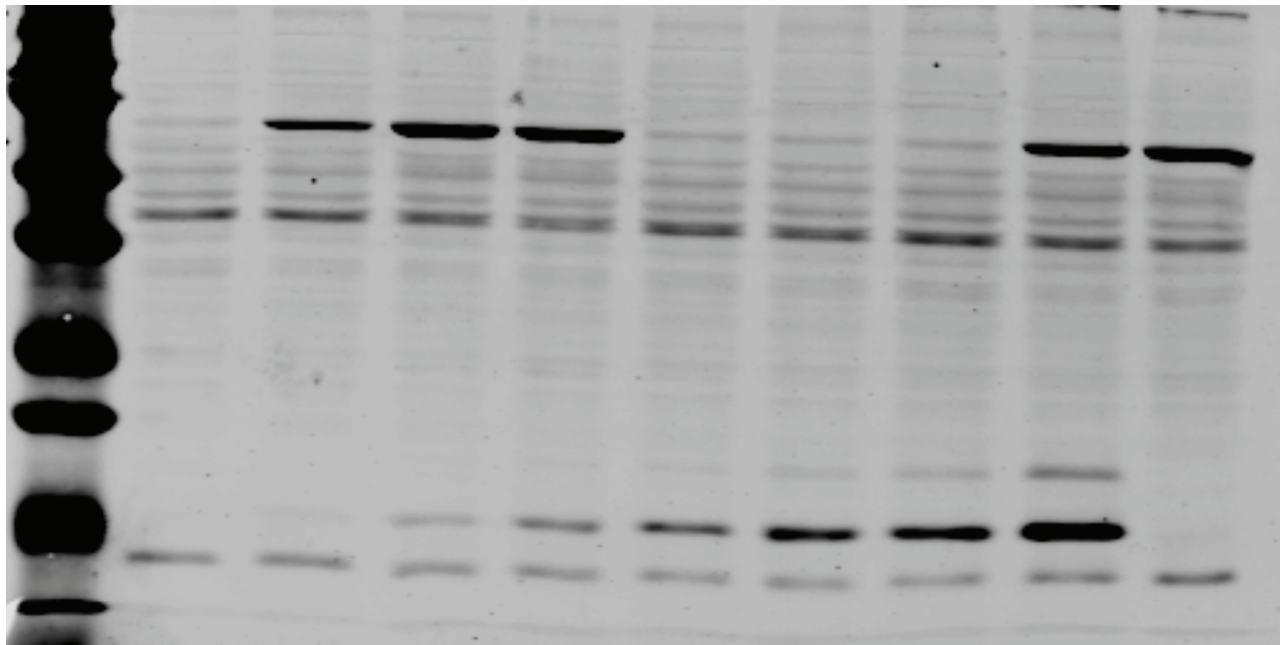

Citrate Synthase

MPC2-HA  
Endogenous MPC2

Supplement: fig3-data3 [file Source data Figure 3a uncropped western blots 2.pdf › Figure 3-source data 2- PDF files containing originall western blots for Figure 3a,indicating the relevant bands and treatments./Source data Figure 3a uncropped western blots 2.pdf]

0

2

4

6

8

10

12

24

EV24 DOX (Hours)

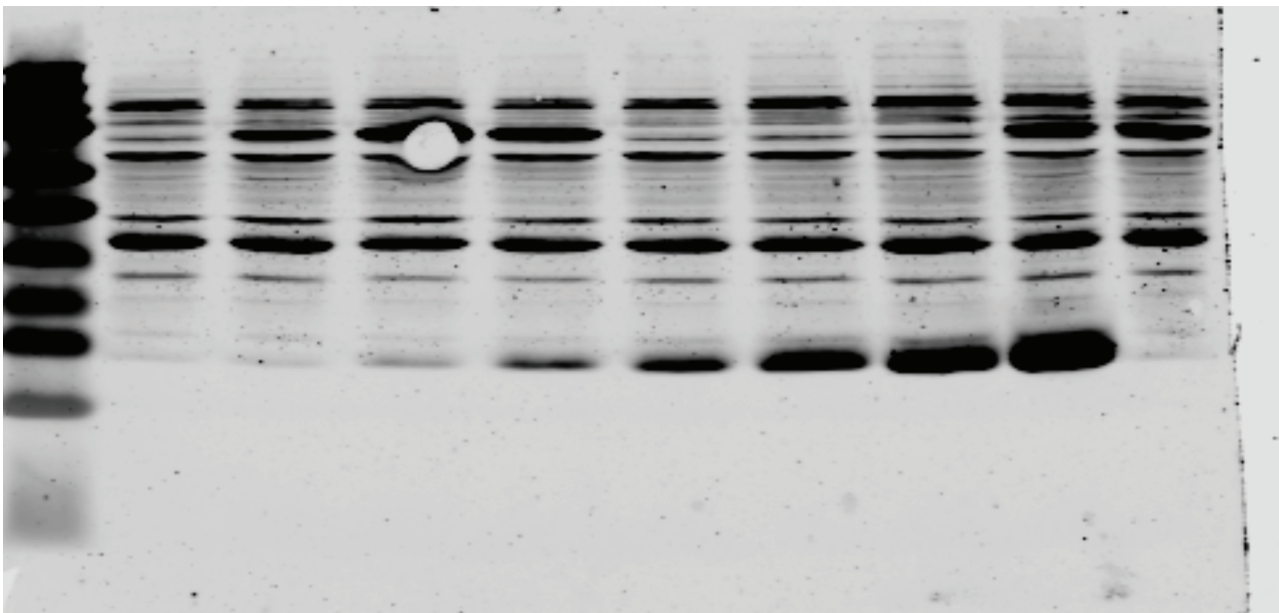

Flag

Supplement: fig3-data3 [file Source data Figure 3a uncropped western blots 3.pdf › Figure 3-source data 2- PDF files containing originall western blots for Figure 3a,indicating the relevant bands and treatments./Source data Figure 3a uncropped western blots 3.pdf]

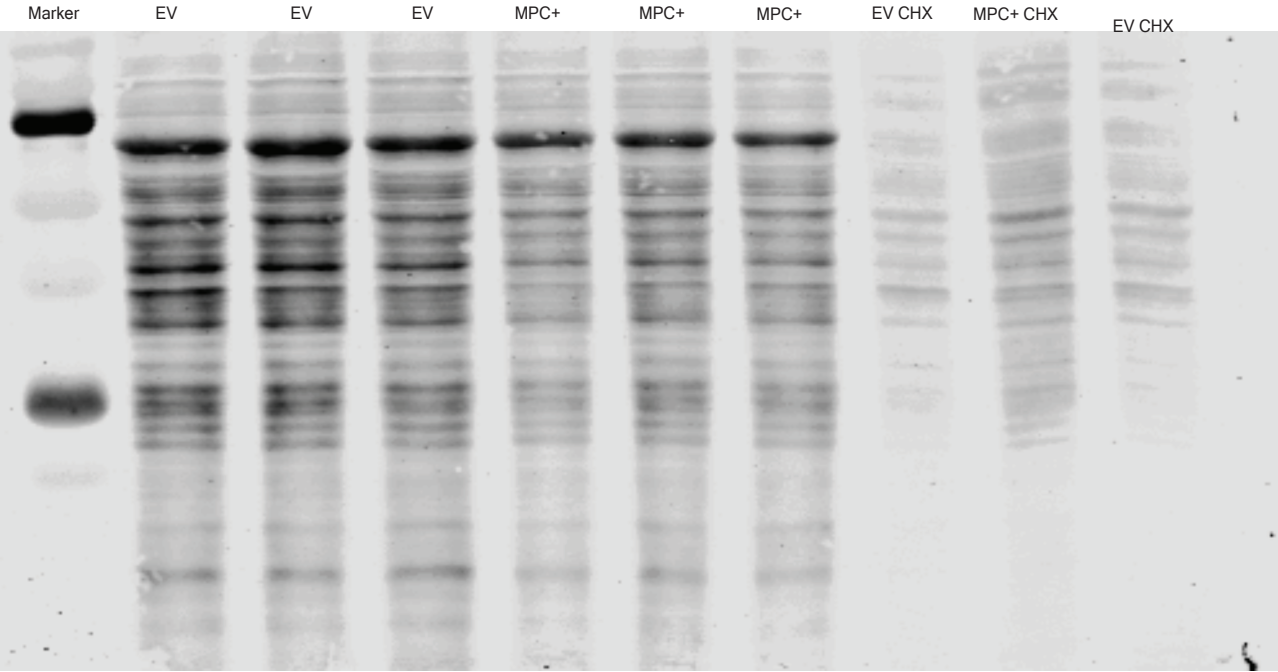

Supplement: fig3-data5 [file Figure 3-source data 1- PDF files containing originall western blots for Figure 3k,indicating the relevant bands and treatments 1.pdf › Figure 3-source data 1- PDF files containing originall western blots for Figure 3k,indicating the relevant bands and treatments./Figure 3-source data 1- PDF files containing originall western blots for Figure 3k,indicating the relevant bands and treatments 1.pdf]

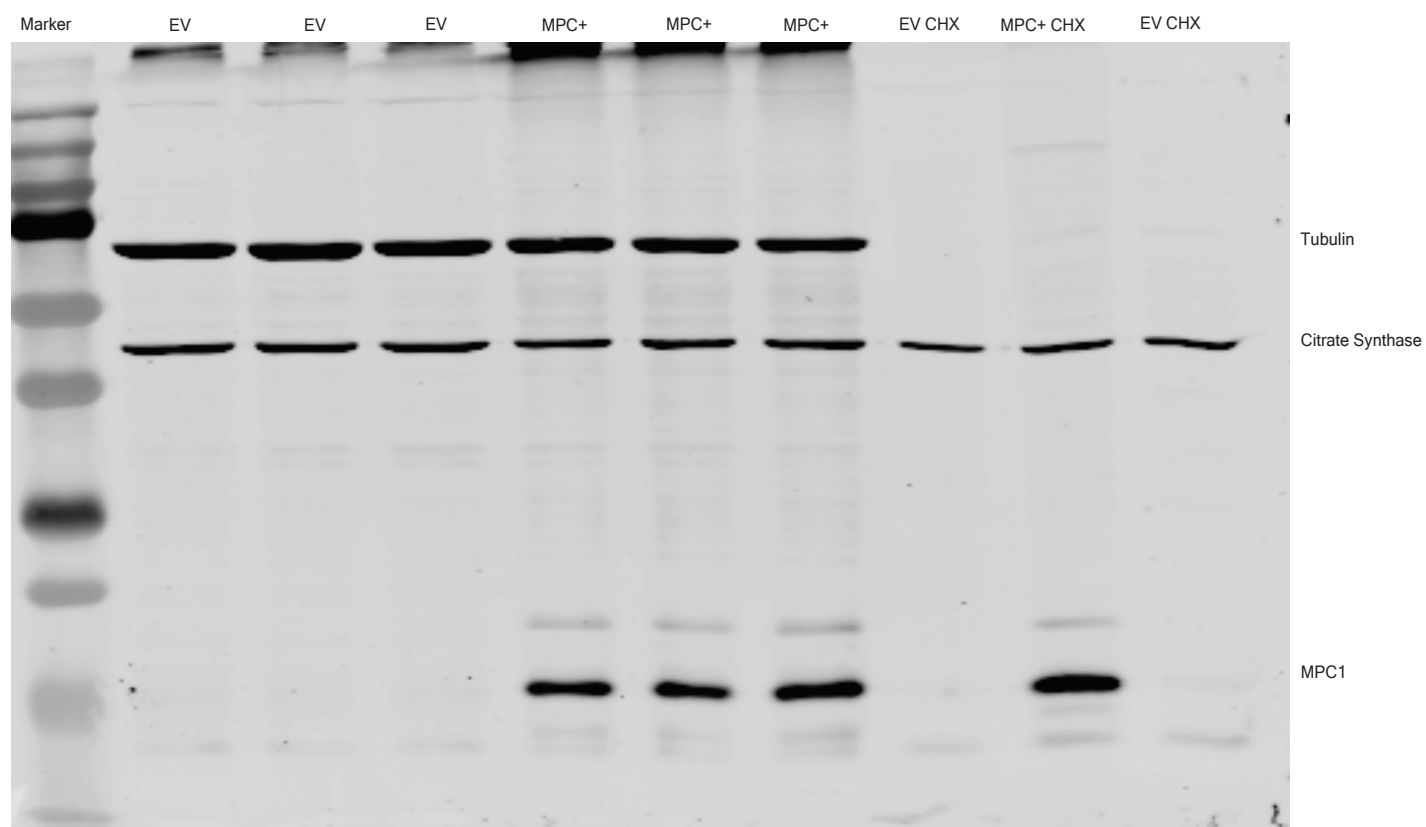

Supplement: fig3-data5 [file Figure 3-source data 1- PDF files containing originall western blots for Figure 3k,indicating the relevant bands and treatments 2.pdf › Figure 3-source data 1- PDF files containing originall western blots for Figure 3k,indicating the relevant bands and treatments./Figure 3-source data 1- PDF files containing originall western blots for Figure 3k,indicating the relevant bands and treatments 2.pdf]

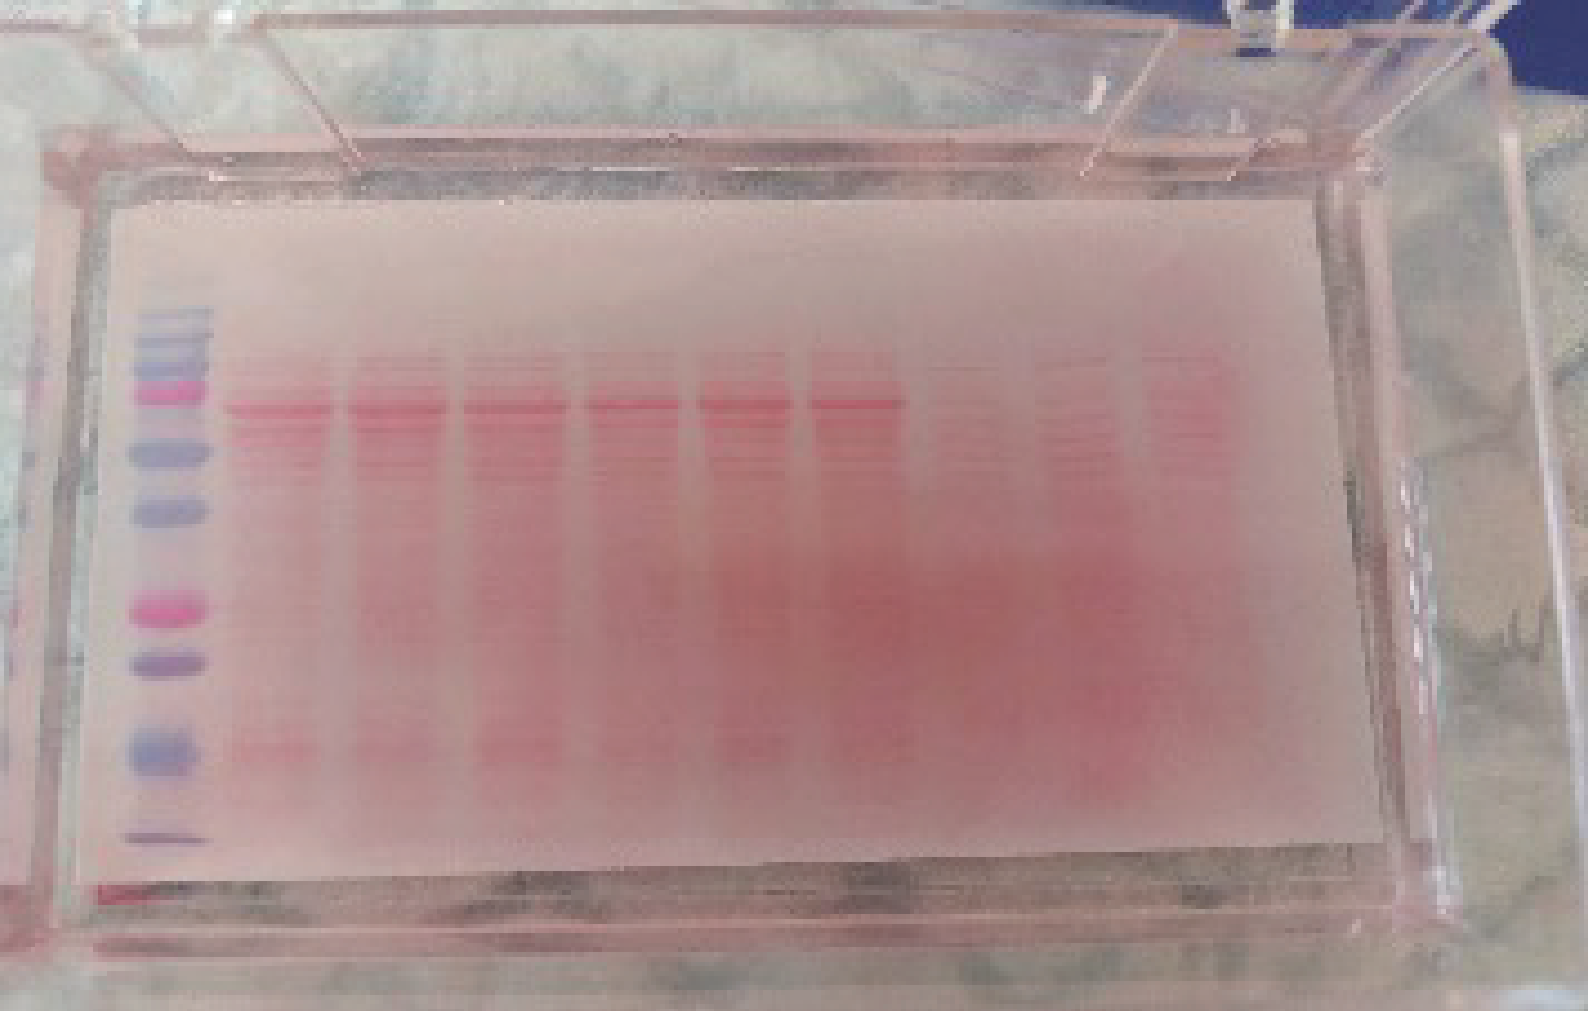

Supplement: fig3-data5 [file Figure 3-source data 1- PDF files containing originall western blots for Figure 3k,indicating the relevant bands and treatments 3.pdf › Figure 3-source data 1- PDF files containing originall western blots for Figure 3k,indicating the relevant bands and treatments./Figure 3-source data 1- PDF files containing originall western blots for Figure 3k,indicating the relevant bands and treatments 3.pdf]

| EV   |        |     |     | MPC+ |        |     |     | genotype  |
|------|--------|-----|-----|------|--------|-----|-----|-----------|
| DMSO | UK5099 | NMN | Asp | DMSO | UK5099 | NMN | Asp | Treatment |

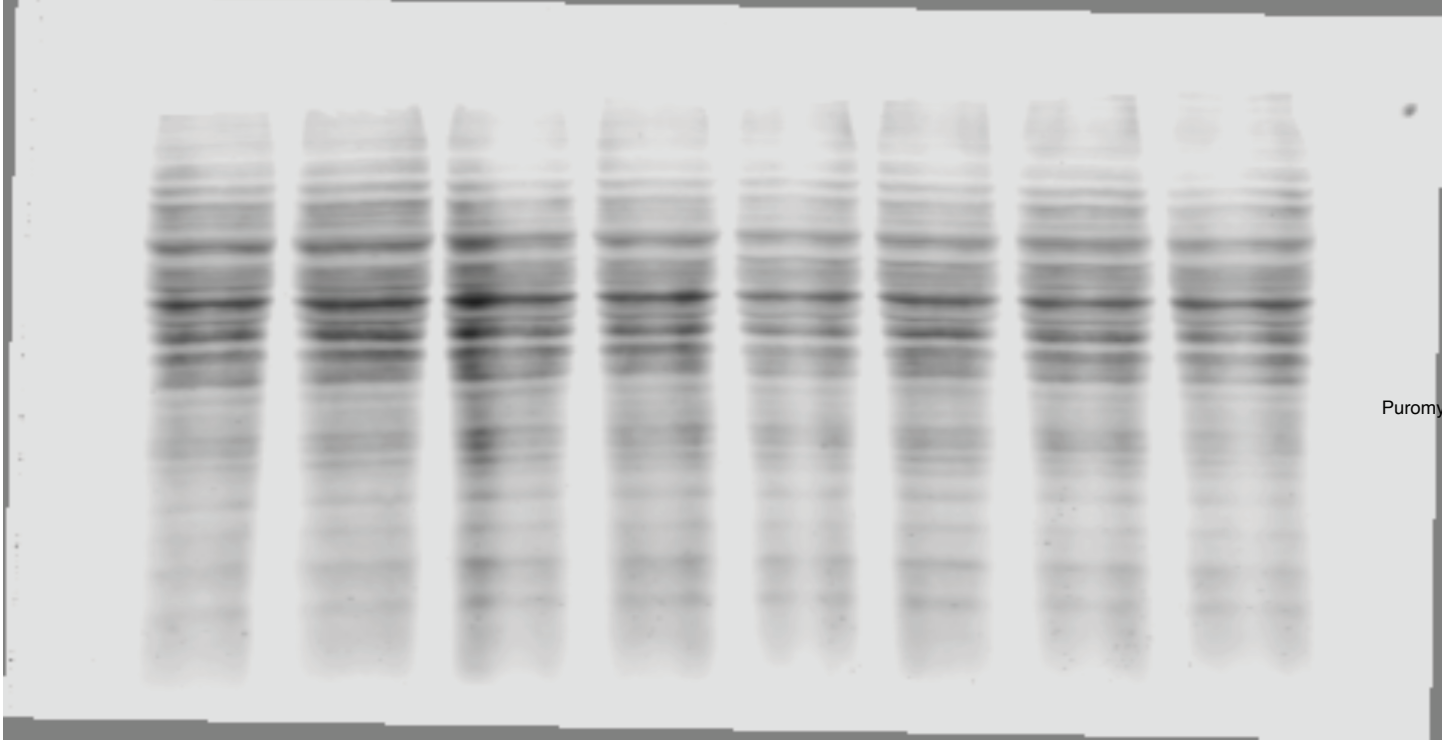

Supplement: fig6-data2 [file Figure 6-source data 1- PDF files containing originall western blots for Figure 6i,indicating the relevant bands and treatments 1.pdf › Figure 6-source data 1- PDF files containing originall western blots for Figure 6i,indicating the relevant bands and treatments./Figure 6-source data 1- PDF files containing originall western blots for Figure 6i,indicating the relevant bands and treatments 1.pdf]

| EV   |        |     |     | MPC+ |        |     |     | genotype  |
|------|--------|-----|-----|------|--------|-----|-----|-----------|
| DMSO | UK5099 | NMN | Asp | DMSO | UK5099 | NMN | Asp | Treatment |

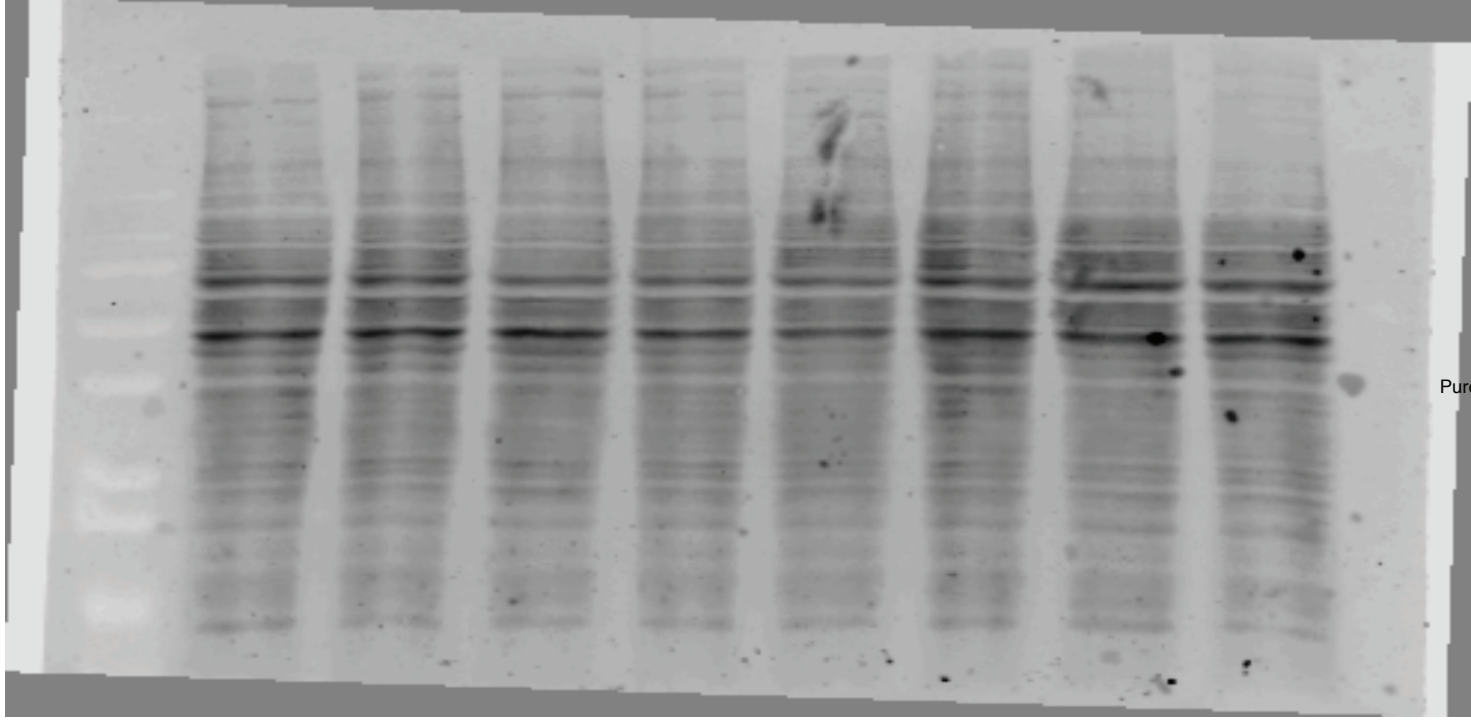

Puromycin

Supplement: fig6-data2 [file Figure 6-source data 1- PDF files containing originall western blots for Figure 6i,indicating the relevant bands and treatments 2.pdf › Figure 6-source data 1- PDF files containing originall western blots for Figure 6i,indicating the relevant bands and treatments./Figure 6-source data 1- PDF files containing originall western blots for Figure 6i,indicating the relevant bands and treatments 2.pdf]

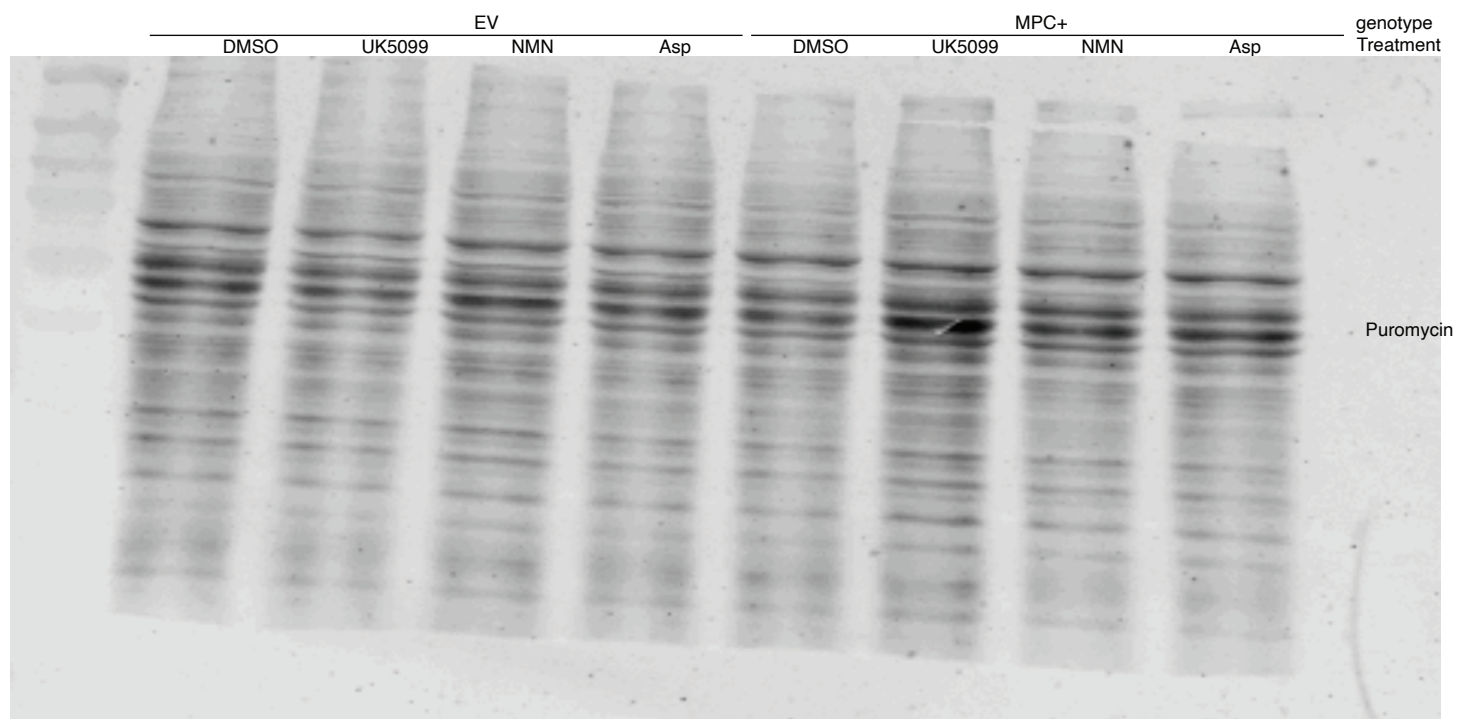

Supplement: fig6-data2 [file Figure 6-source data 1- PDF files containing originall western blots for Figure 6i,indicating the relevant bands and treatments 3.pdf › Figure 6-source data 1- PDF files containing originall western blots for Figure 6i,indicating the relevant bands and treatments./Figure 6-source data 1- PDF files containing originall western blots for Figure 6i,indicating the relevant bands and treatments 3.pdf]

| EV   |        |     |     | MPC+ |        |     |     | genotype  |
|------|--------|-----|-----|------|--------|-----|-----|-----------|
| DMSO | UK5099 | NMN | Asp | DMSO | UK5099 | NMN | Asp | Treatment |

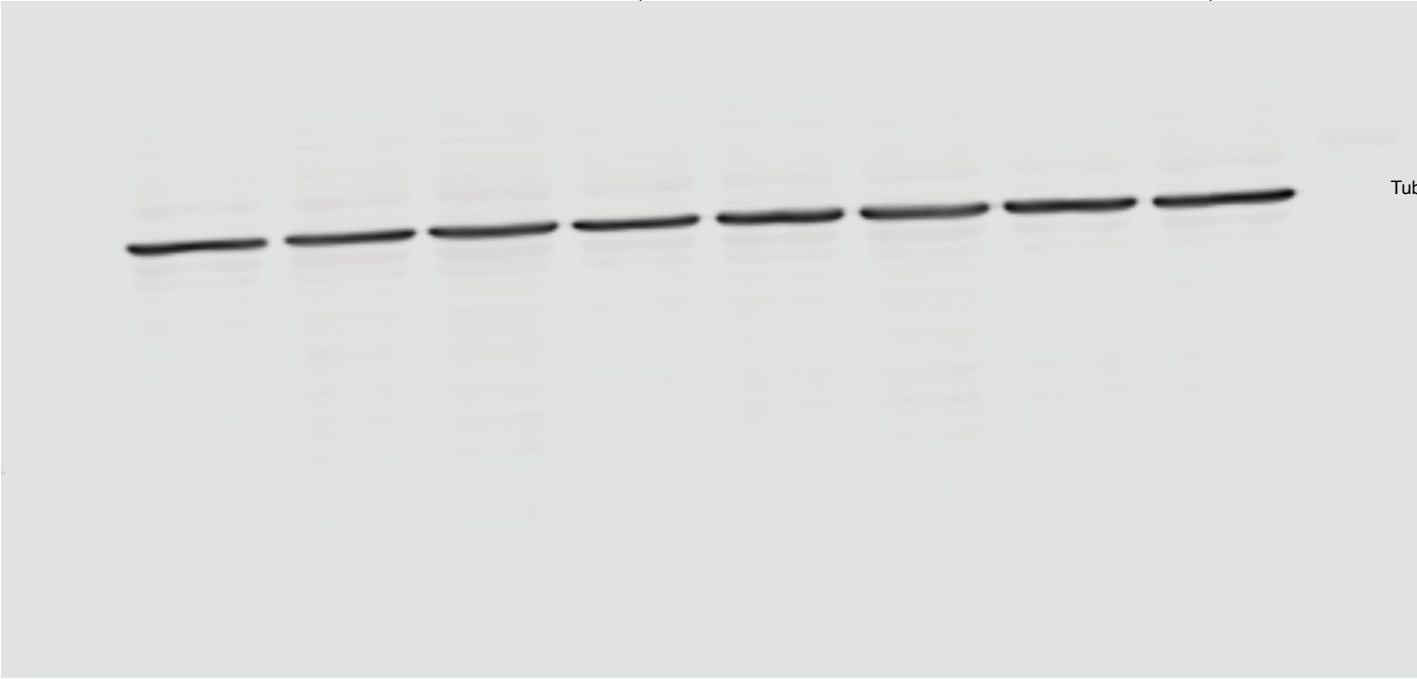

Supplement: fig6-data2 [file Figure 6-source data 1- PDF files containing originall western blots for Figure 6i,indicating the relevant bands and treatments 4.pdf › Figure 6-source data 1- PDF files containing originall western blots for Figure 6i,indicating the relevant bands and treatments./Figure 6-source data 1- PDF files containing originall western blots for Figure 6i,indicating the relevant bands and treatments 4.pdf]

| EV   |        |     |     | MPC+ |        |     |     | genotype  |
|------|--------|-----|-----|------|--------|-----|-----|-----------|
| DMSO | UK5099 | NMN | Asp | DMSO | UK5099 | NMN | Asp | Treatment |

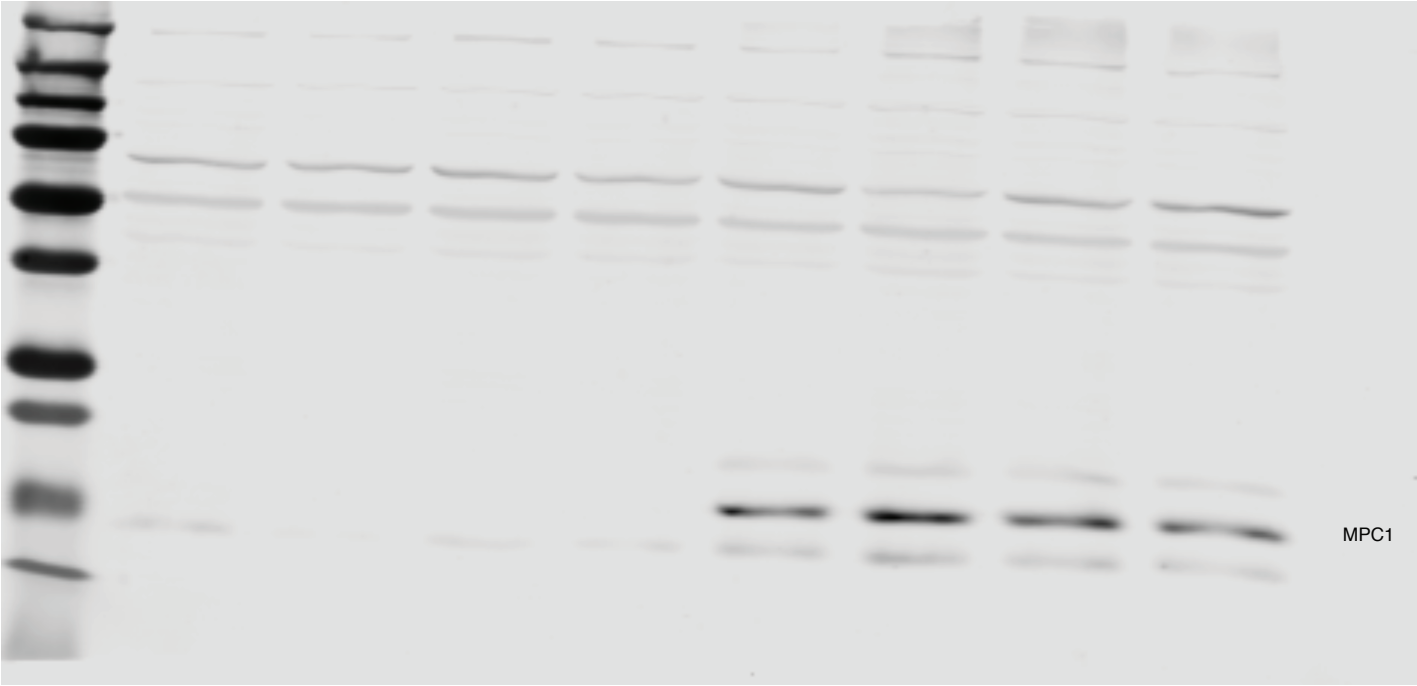

Supplement: fig6-data2 [file Figure 6-source data 1- PDF files containing originall western blots for Figure 6i,indicating the relevant bands and treatments 5.pdf › Figure 6-source data 1- PDF files containing originall western blots for Figure 6i,indicating the relevant bands and treatments./Figure 6-source data 1- PDF files containing originall western blots for Figure 6i,indicating the relevant bands and treatments 5.pdf]

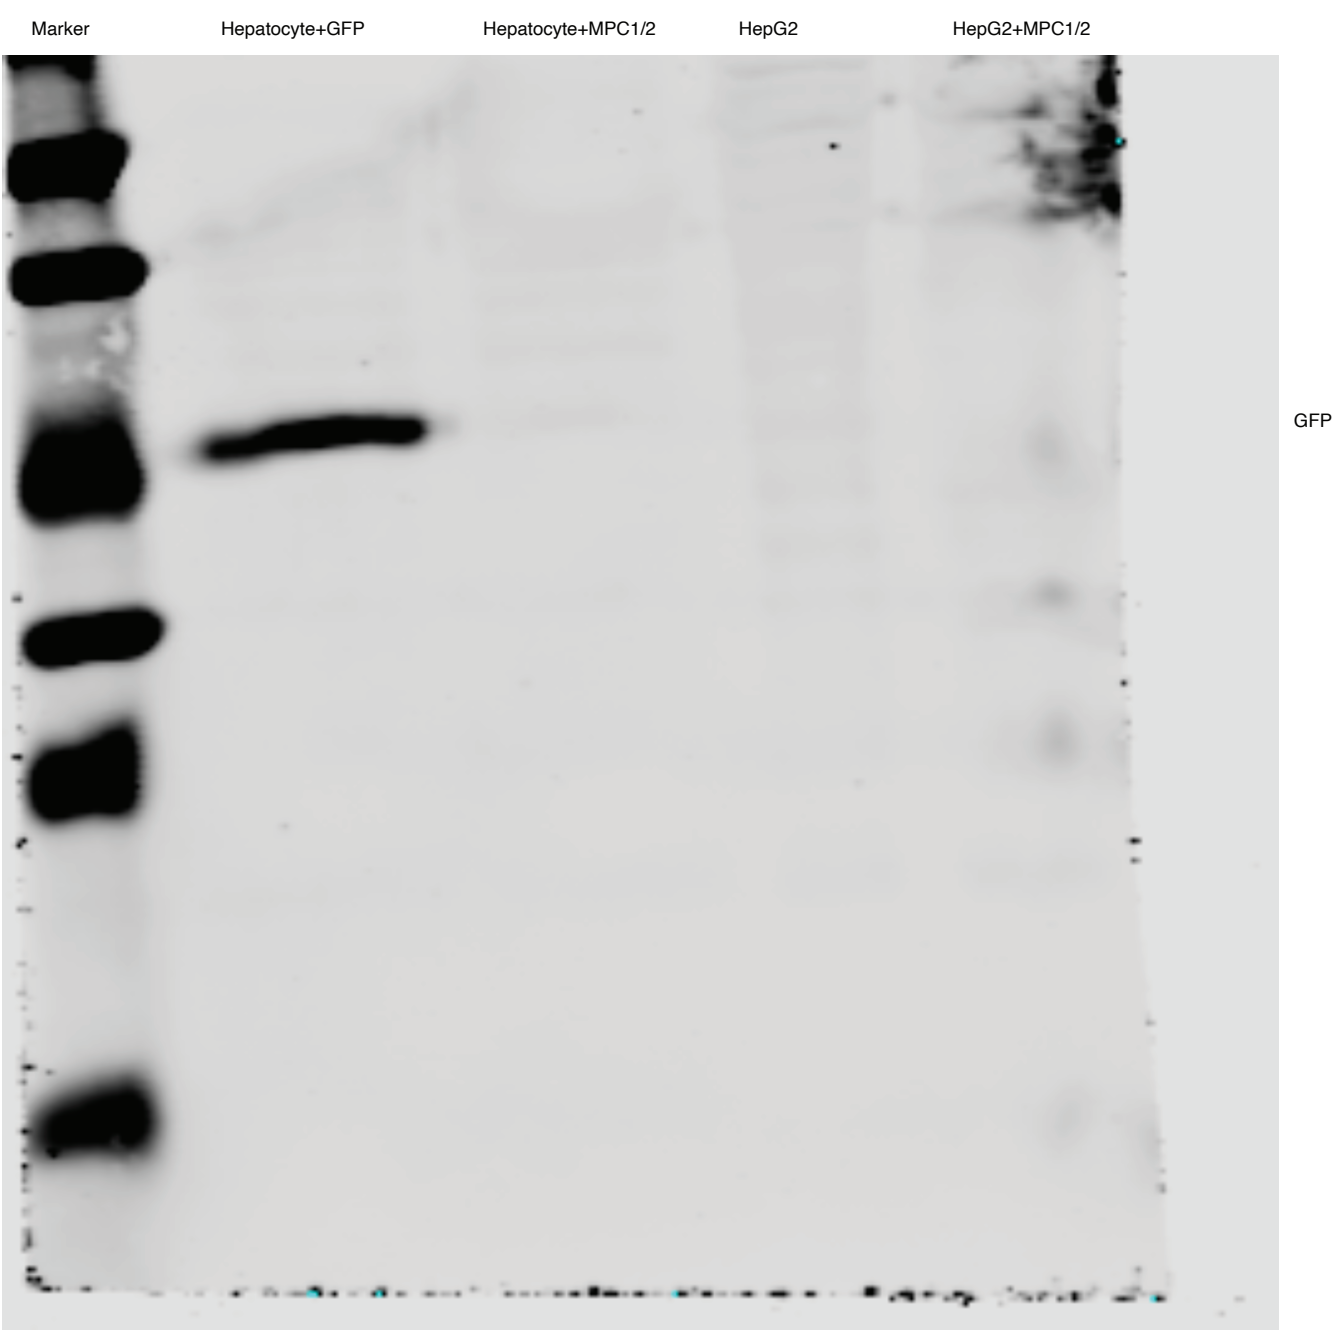

Supplement: fig7-data2 [file Figure 7-source data 1- PDF files containing originall western blots for Figure 7a,indicating the relevant bands and treatments 1..pdf › Figure 7-source data 1- PDF files containing originall western blots for Figure 7a,indicating the relevant bands and treatments./Figure 7-source data 1- PDF files containing originall western blots for Figure 7a,indicating the relevant bands and treatments 1..pdf]

Marker

Hepatocyte+GFP

Hepatocyte+MPC1/2

HepG2

HepG2+MPC1/2

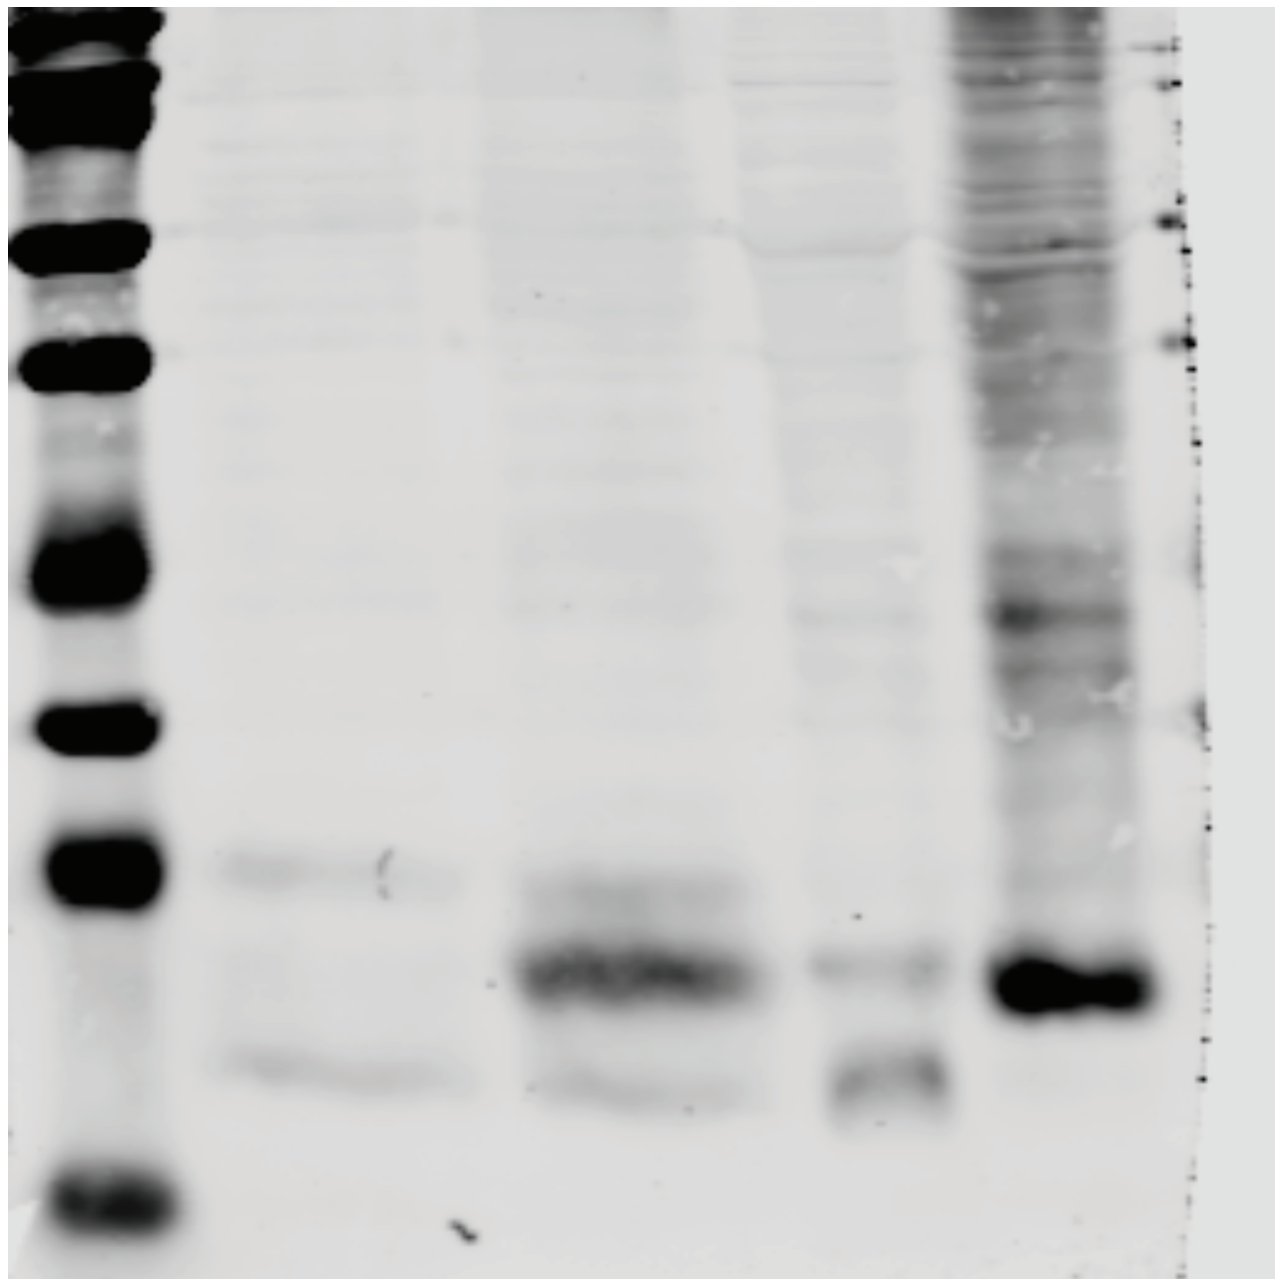

MPC1

Supplement: fig7-data2 [file Figure 7-source data 1- PDF files containing originall western blots for Figure 7a,indicating the relevant bands and treatments 2.pdf › Figure 7-source data 1- PDF files containing originall western blots for Figure 7a,indicating the relevant bands and treatments./Figure 7-source data 1- PDF files containing originall western blots for Figure 7a,indicating the relevant bands and treatments 2.pdf]

Marker      Hepatocyte+GFP      Hepatocyte+MPC1/2      HepG2      HepG2+MPC1/2

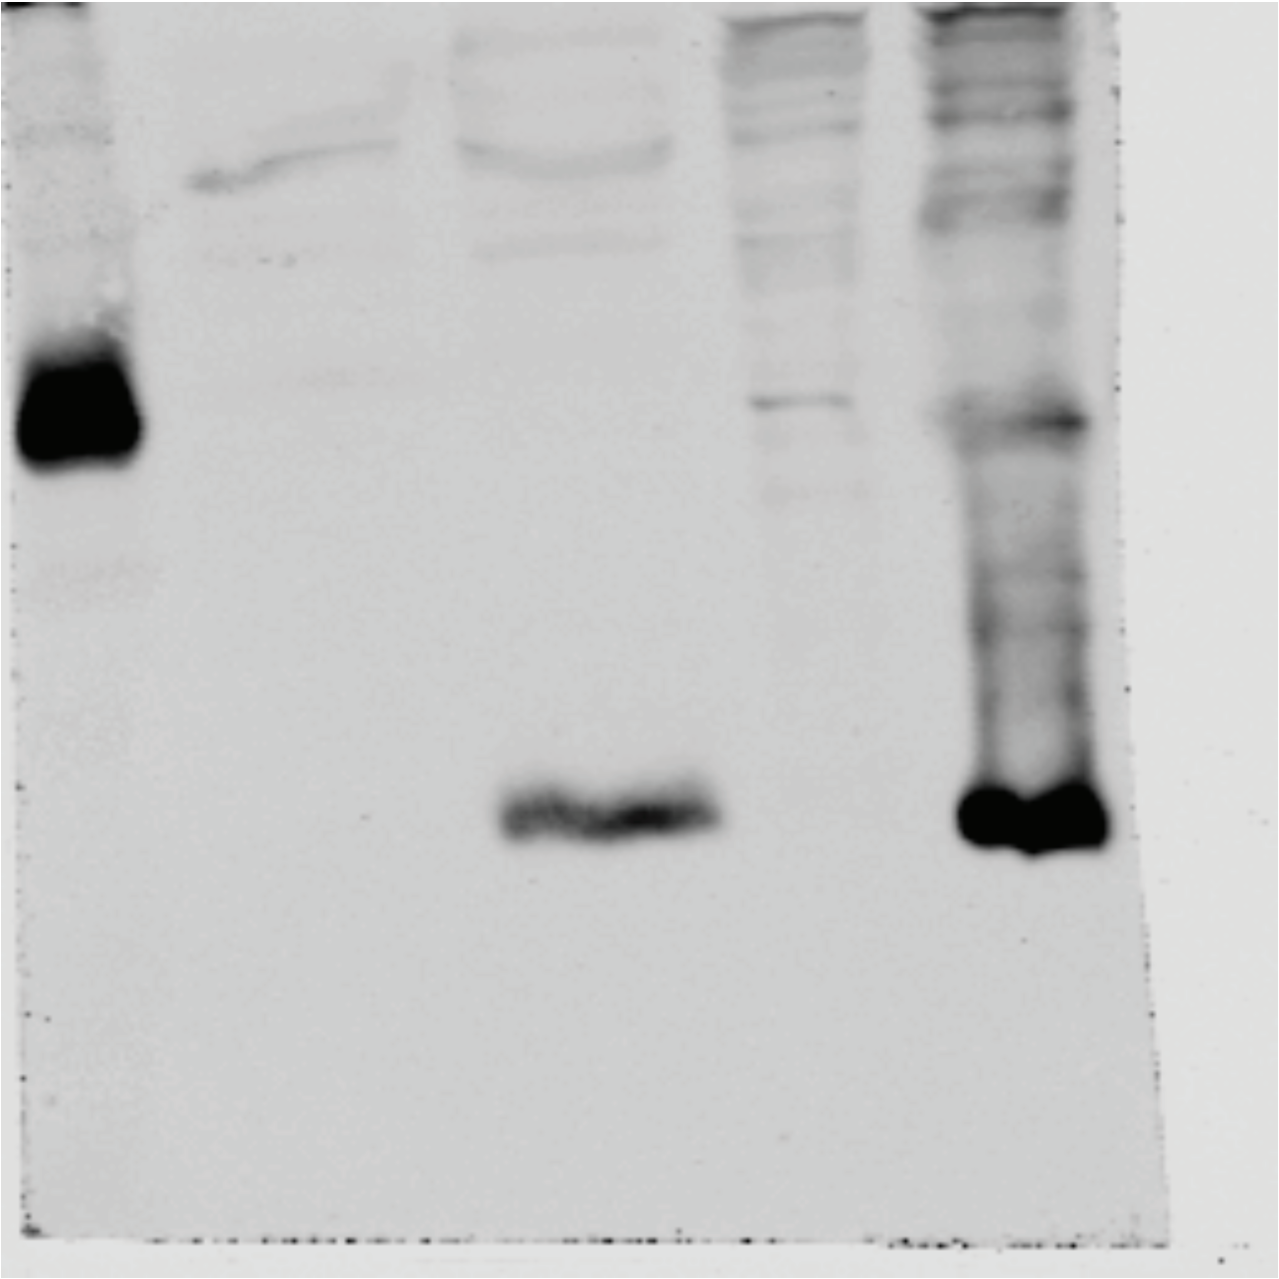

Flag

Supplement: fig7-data2 [file Figure 7-source data 1- PDF files containing originall western blots for Figure 7a,indicating the relevant bands and treatments 3.pdf › Figure 7-source data 1- PDF files containing originall western blots for Figure 7a,indicating the relevant bands and treatments./Figure 7-source data 1- PDF files containing originall western blots for Figure 7a,indicating the relevant bands and treatments 3.pdf]

Marker

Hepatocyte+GFP

Hepatocyte+MPC1/2

HepG2

HepG2+MPC1/2

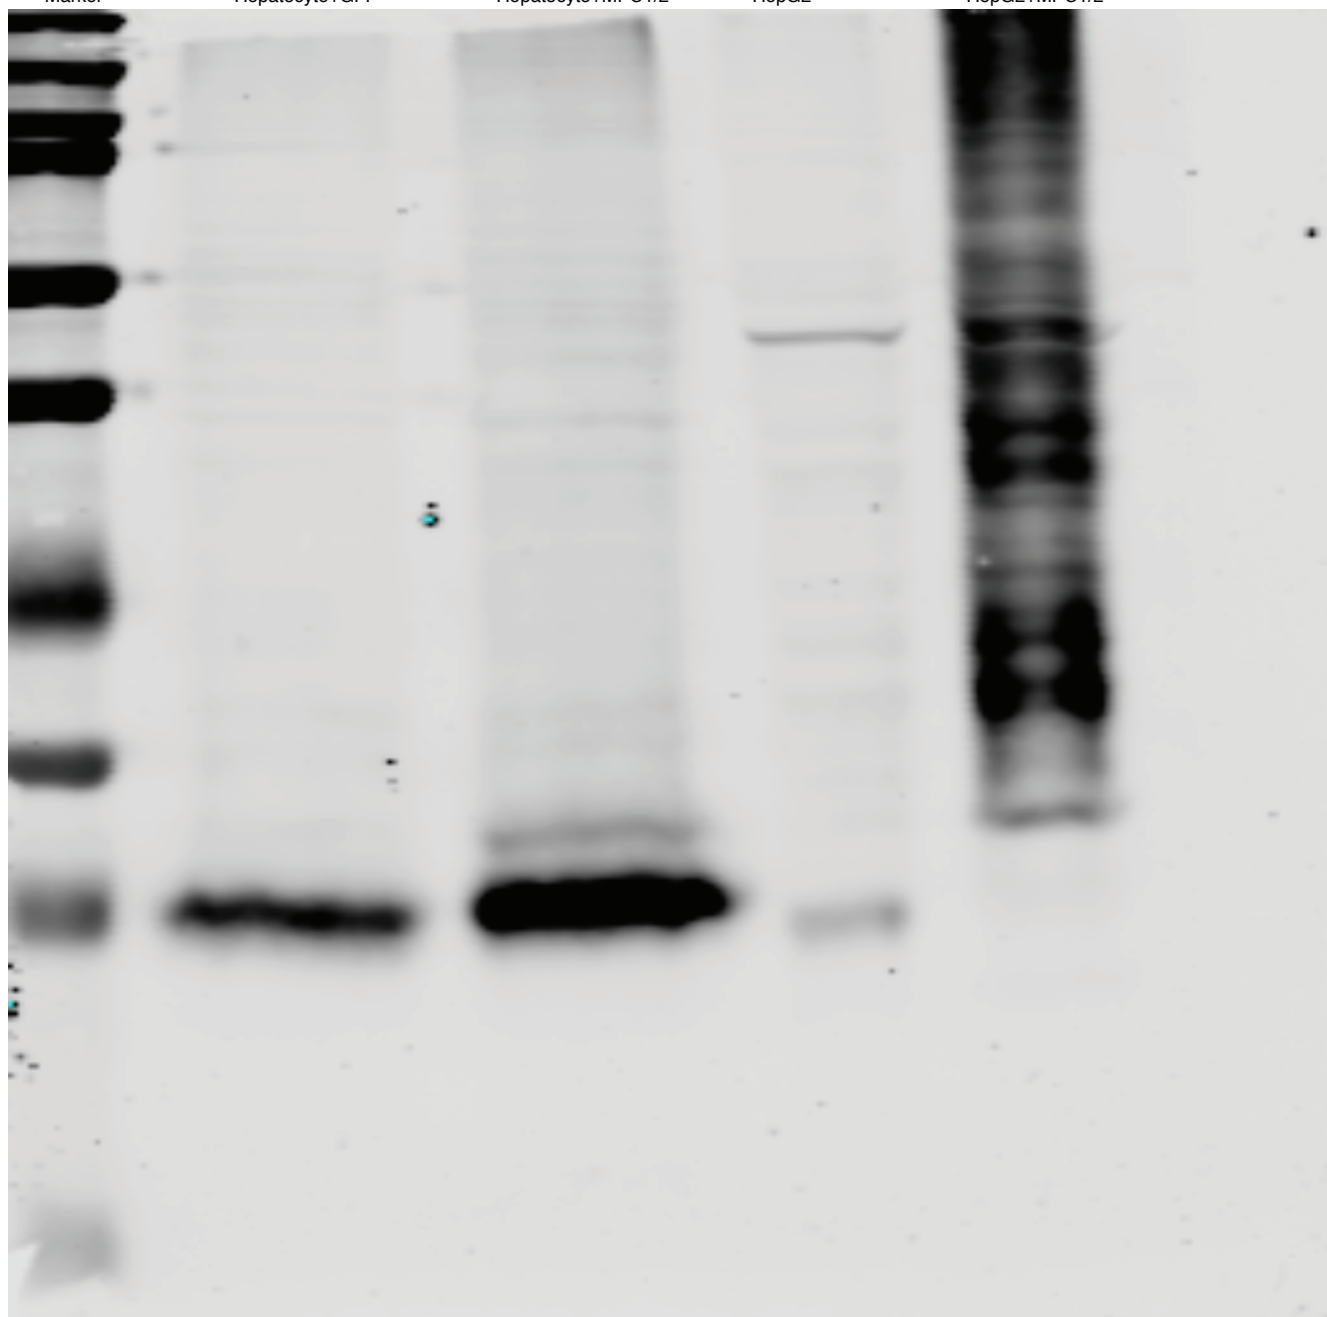

MPC2

Supplement: fig7-data2 [file Figure 7-source data 1- PDF files containing originall western blots for Figure 7a,indicating the relevant bands and treatments 4.pdf › Figure 7-source data 1- PDF files containing originall western blots for Figure 7a,indicating the relevant bands and treatments./Figure 7-source data 1- PDF files containing originall western blots for Figure 7a,indicating the relevant bands and treatments 4.pdf]

Marker

Hepatocyte+GFP

Hepatocyte+MPC1/2

HepG2

HepG2+MPC1/2

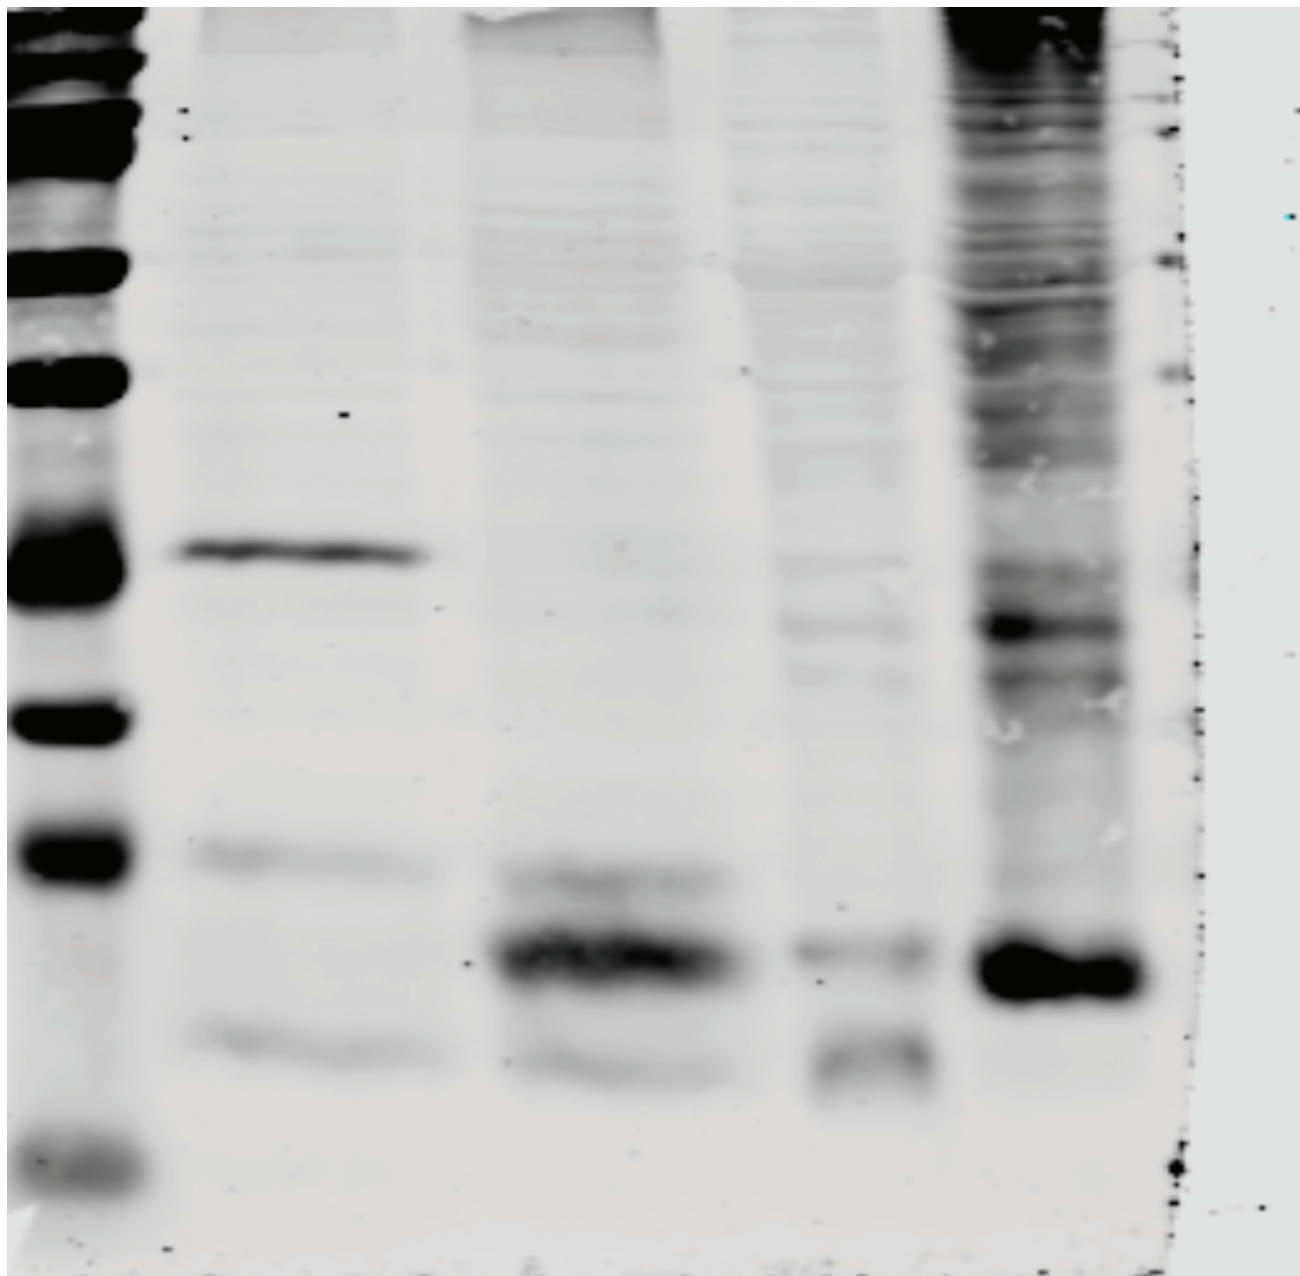

GFP

HA

Supplement: fig7-data2 [file Figure 7-source data 1- PDF files containing originall western blots for Figure 7a,indicating the relevant bands and treatments 5.pdf › Figure 7-source data 1- PDF files containing originall western blots for Figure 7a,indicating the relevant bands and treatments./Figure 7-source data 1- PDF files containing originall western blots for Figure 7a,indicating the relevant bands and treatments 5.pdf]

Marker

Hepatocyte+GFP

Hepatocyte+MPC1/2

HepG2

HepG2+MPC1/2

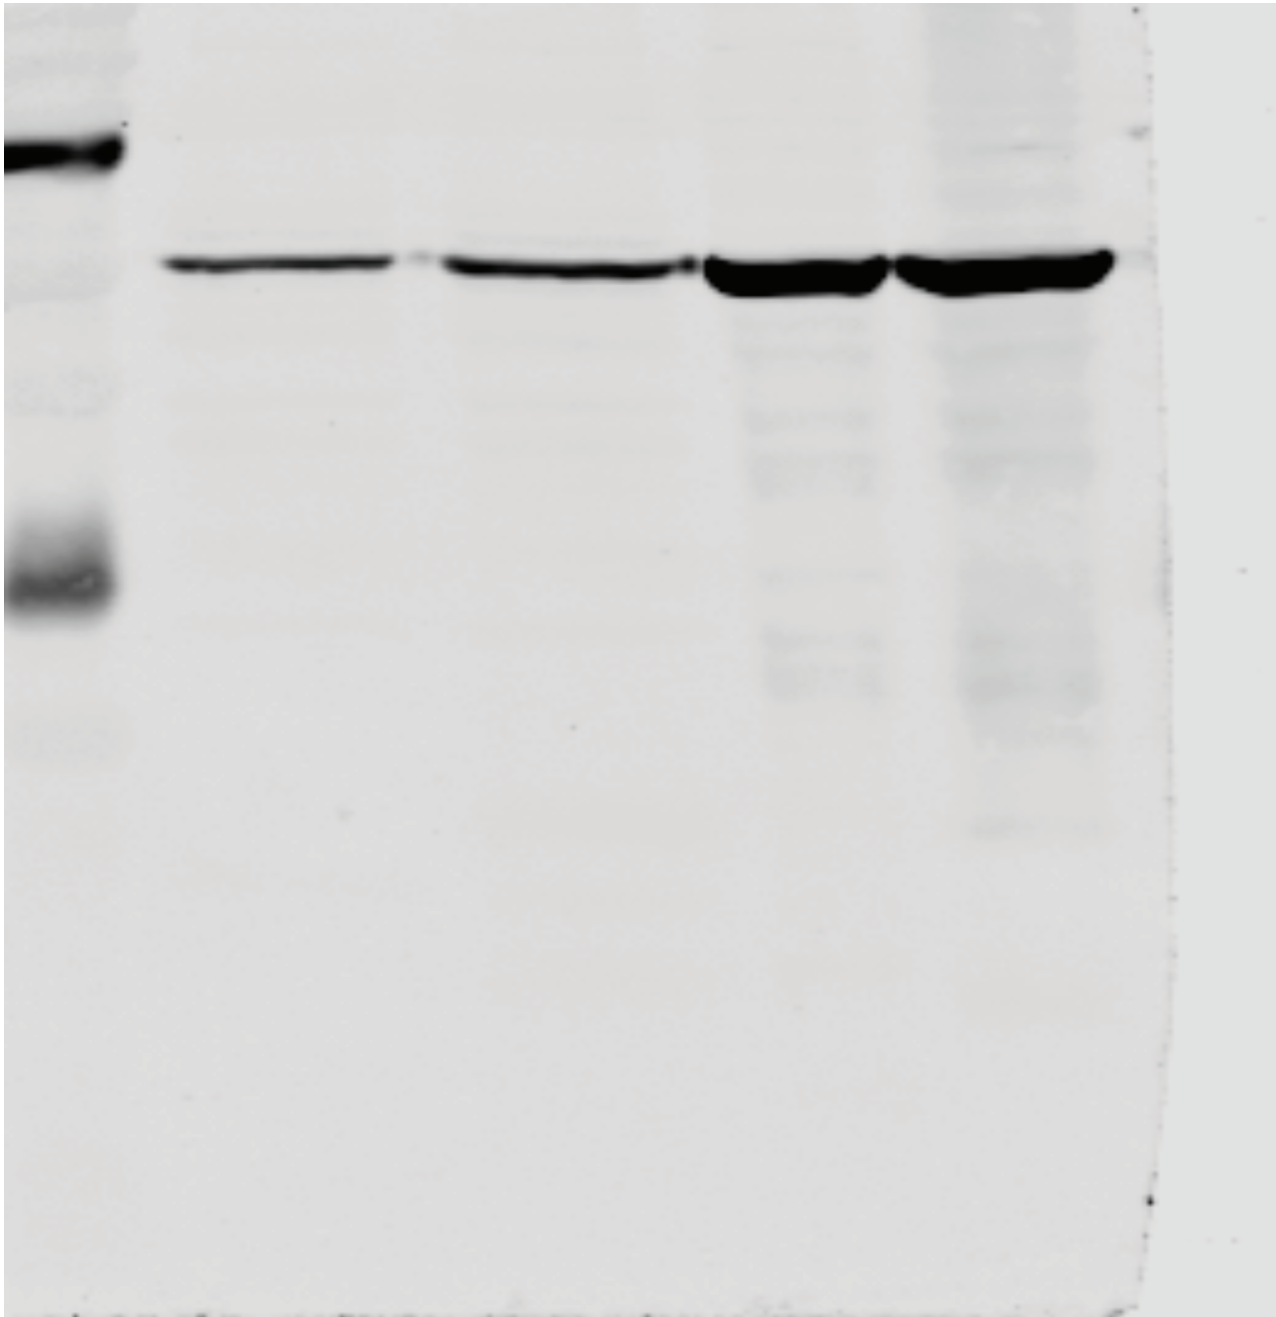

Tubulin

Supplement: fig7-data2 [file Figure 7-source data 1- PDF files containing originall western blots for Figure 7a,indicating the relevant bands and treatments 6.pdf › Figure 7-source data 1- PDF files containing originall western blots for Figure 7a,indicating the relevant bands and treatments./Figure 7-source data 1- PDF files containing originall western blots for Figure 7a,indicating the relevant bands and treatments 6.pdf]
